# Supplementary material for: Discovering the Protective Effects of Quercetin on Aflatoxin B1-Induced Toxicity in Bovine Foetal Hepatocyte-Derived Cells (BFH12)
Source: MDPI journal article supplement (doi:10.3390/toxins15090555), 2023-09-06
Supplement: s1 [file s1]

## Supplementary material

# Discovering the Protective Effects of Quercetin on Aflatoxin B1-Induced Toxicity in Bovine Foetal Hepatocyte-Derived Cells (BFH12)

**Marianna Pauletto <sup>1†</sup>, Mery Giantin <sup>1†</sup>, Roberta Tolosi <sup>1</sup>, Irene Bassan <sup>1‡</sup>, Anisa Bardhi <sup>2</sup>, Andrea Barbarossa <sup>2</sup>, Ludovica Montanucci <sup>3</sup>, Anna Zaghini <sup>2</sup> and Mauro Dacasto <sup>1</sup>**

<sup>1</sup> Department of Comparative Biomedicine and Food Science, University of Padua, Viale dell'Università 16, I-35020 Legnaro, Italy; mery.giantin@unipd.it (M.G.); roberta.tolosi@unipd.it (R.T.); irene.bassan2@gmail.com (I.B.); mauro.dacasto@unipd.it (M.D.)

<sup>2</sup> Department of Veterinary Medical Sciences, Alma Mater Studiorum—University of Bologna, Via Tolara di Sopra 50, Ozzano dell'Emilia, I-40064 Bologna, Italy; anisa.bardhi@unibo.it (A.B.); andrea.barbarossa@unibo.it (A.B.); anna.zaghini@unibo.it (A.Z.)

<sup>3</sup> Genomic Medicine Institute, Lerner Research Institute, Cleveland Clinic, 9500 Euclid Avenue, Cleveland, OH 44195, USA; montanl@ccf.org

\* Correspondence: marianna.pauletto@unipd.it; Tel.: +39-049-827-2935

† These authors contributed equally to this work.

‡ Current address: Chelab srl—Mérieux NutriSciences Italia, Via Fratta 25, I-31023 Resana, Italy.

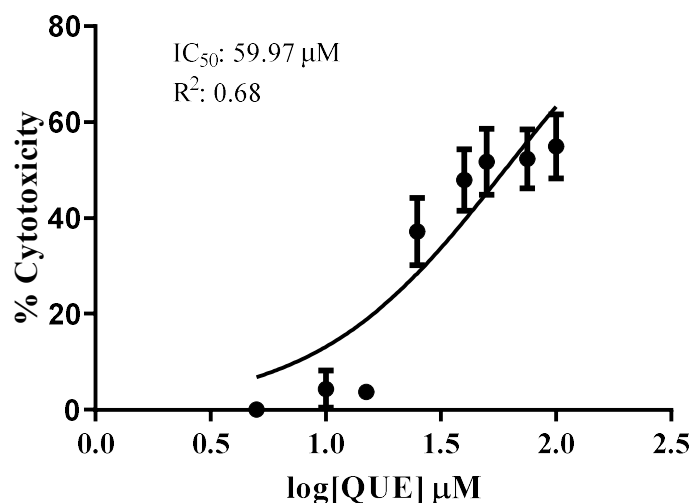

**Figure S1. Cytotoxicity.** Quercetin dose–response curve in BFH12 cells (64 h), based on three independent cell culture experiments, each one run in sextuplicate. Data are expressed in mean cytotoxicity rate  $\pm$  standard error of the mean (SEM).  $IC_{50}$  and  $R^2$  are also reported. QUE=quercetin

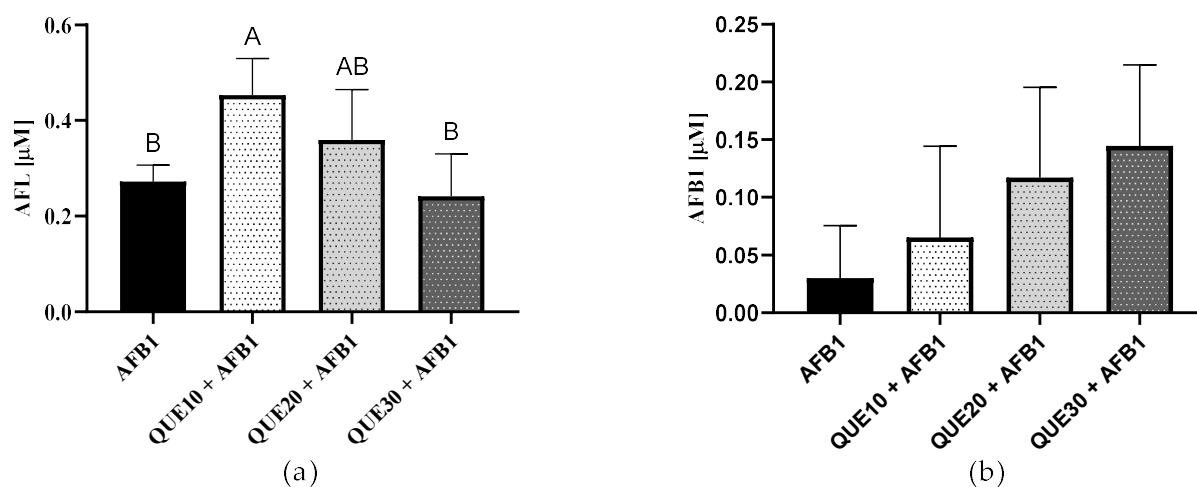

**Figure S2. Effects of QUE in AFB1 biotransformation.** Bars represent the amount ( $\mu M$ ) of either AFL detected in the cellular medium (a) or AFB1 detected in the cellular pellet (b) after 48 h of exposure to 3.6  $\mu M$  AFB1 alone or in combination with QUE increasing concentrations (10, 20, and 30  $\mu M$ ). Data are expressed as mean concentrations  $\pm$  standard deviations of four independent cell culture experiments. Different letters above error bars indicate significant differences ( $p \leq 0.05$ ) among groups (Tukey's post-hoc test). Graphs were obtained by means of GraphPad prism software. AFB1=aflatoxin B1; QUE=quercetin.

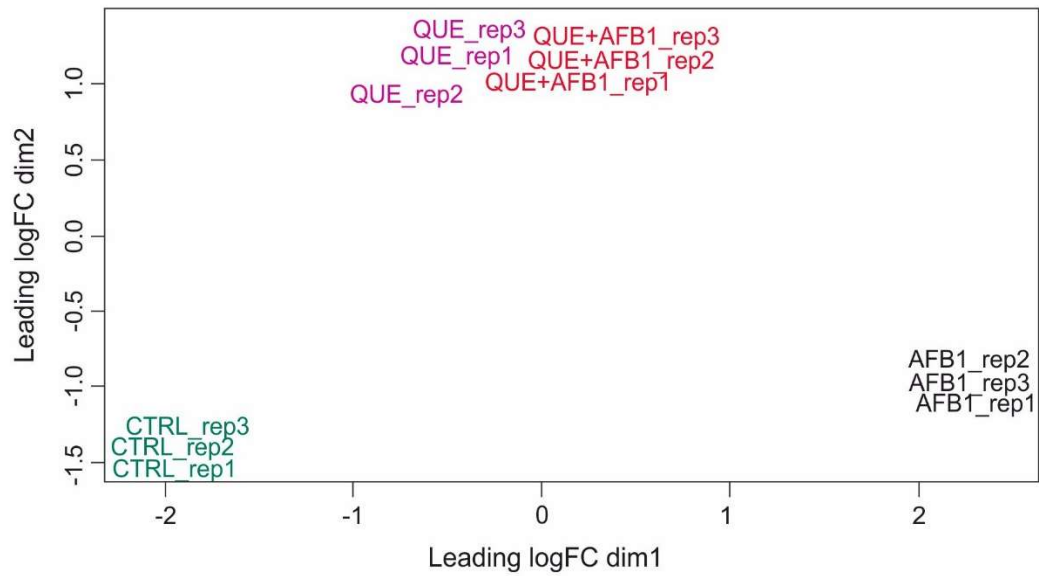

**Figure S3. MDS plot.** The plot shows distances between expression profiles of the twelve RNA-seq libraries evaluated in this study. Biological replicates are represented by rep1, rep2, and rep3 suffix. AFB1=aflatoxin B1; QUE=quercetin.

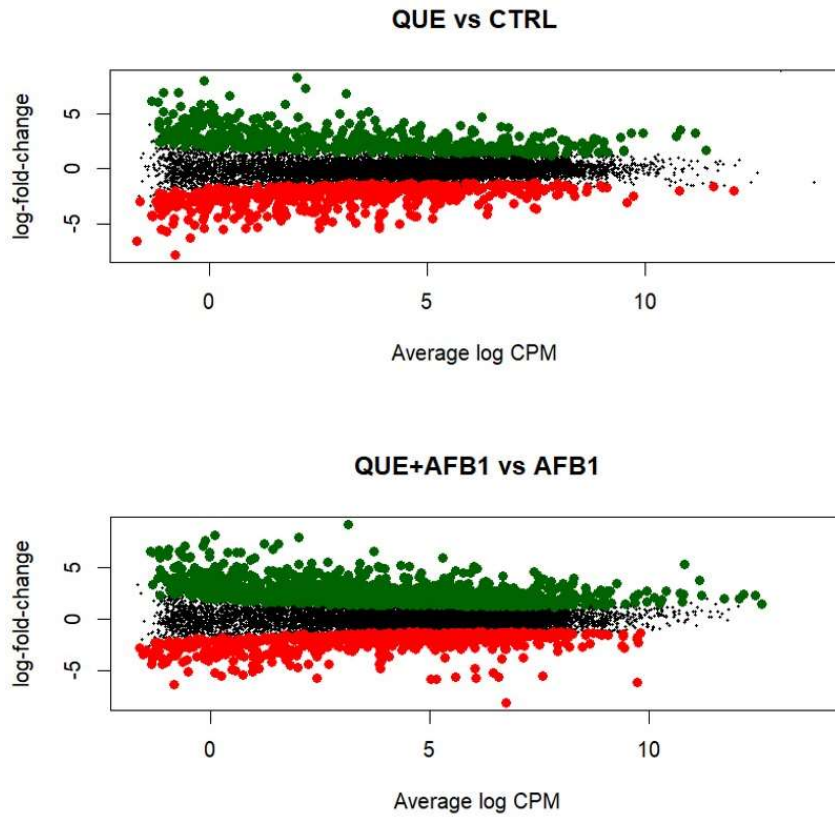

**Figure S4. MD plots.** Plots show the log-fold change and average abundance of each gene in the two comparisons ("QUE vs CTRL" and "QUE+AFB1 vs CTRL"). Genes with fold-changes significantly greater than 2 are highlighted in green (if up-regulated) or red (if down-regulated). CPM = Counts Per Million. AFB1=aflatoxin B1; QUE=quercetin.

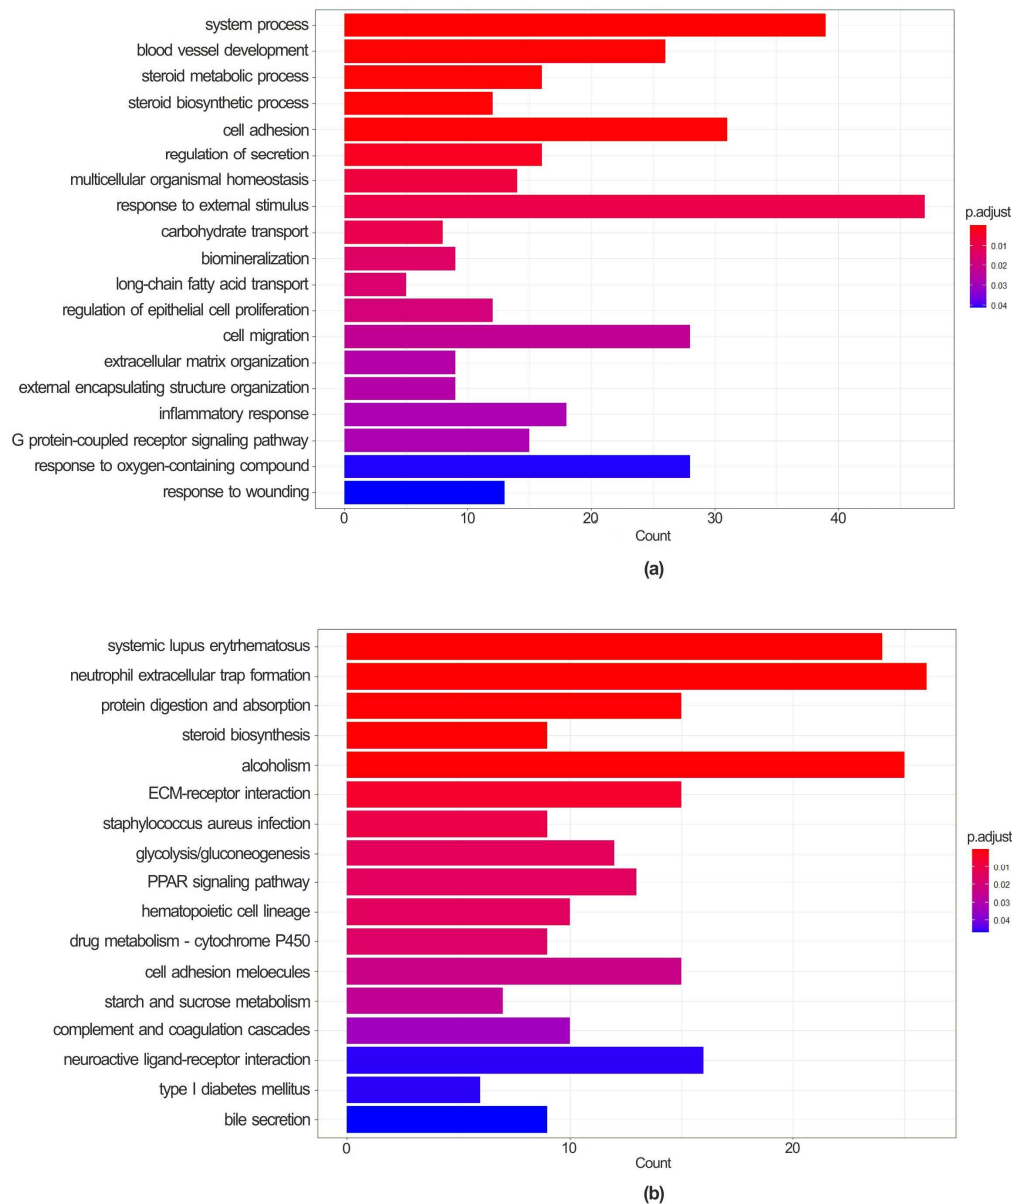

**Figure S5. Over-representation analysis: QUE vs CTRL.** Bar plots report the over-represented BP terms (a) and KEGG pathways (b) in the list of DEGs resulted from the pair-wise comparison “QUE vs CTRL”. Count = number of DEGs in each enriched term/pathway. The color gradient reflects the significance level of each term. P-values were adjusted using the Benjamini-Hochberg method.

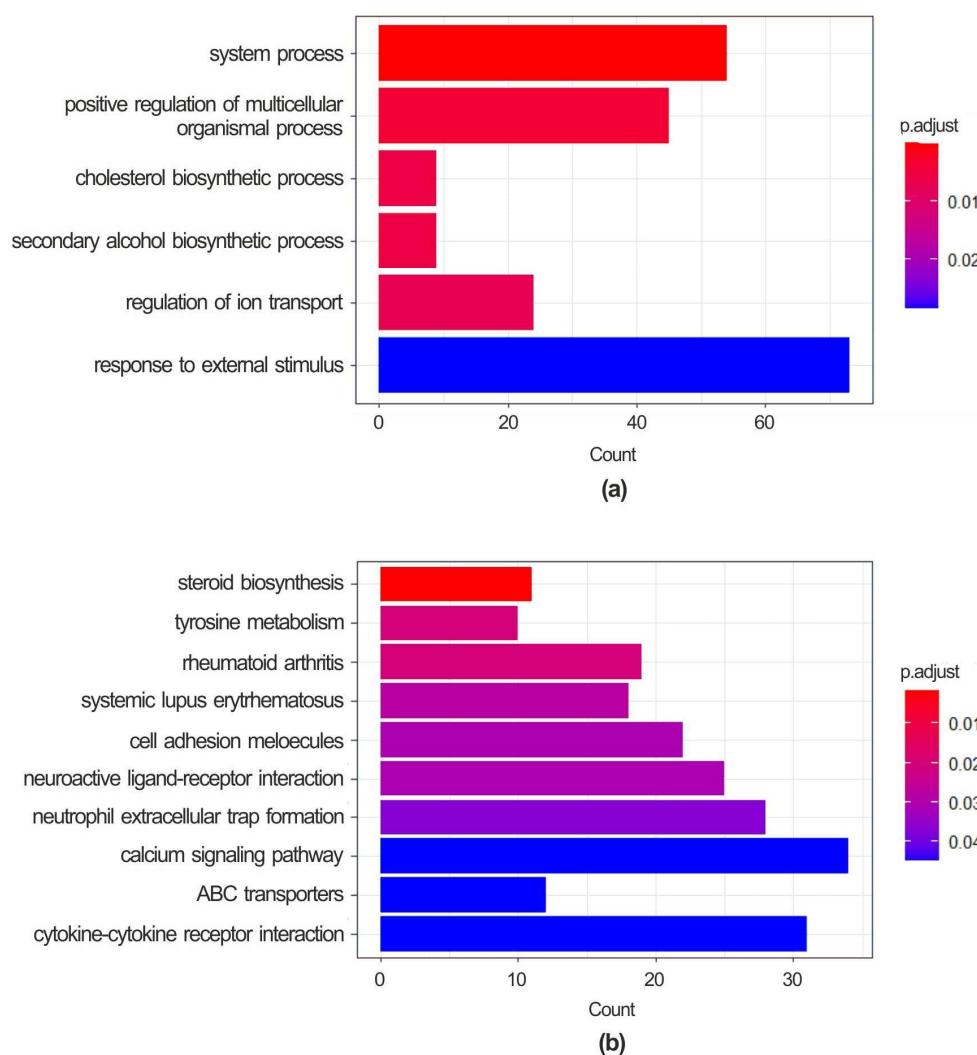

**Figure S6. Over-representation analysis: QUE+AFB1 vs AFB1.** Bar plots report the over-represented BP terms (a) and KEGG pathways (b) in the list of DEGs resulted from the pair-wise comparison “QUE+AFB1 vs AFB1”. Count = number of DEGs in each enriched term/pathway. The color gradient reflects the significance level of each term. P-values were adjusted using the Benjamini-Hochberg method.

| Gene    | QUE + AFB1<br>vs AFB1 |
|---------|-----------------------|
| CYP1A1  | ↑*                    |
| CYP1B1  | ↑                     |
| CYP3A28 | ↓                     |
| GSTA1   | ns                    |
| AHR     | ns                    |
| AHRR    | ↑ / nd                |
| ARNT    | ns                    |
| NRF     | ns                    |
| KEAP1   | ns                    |
| CAT     | ns                    |
| GPX1    | ns                    |
| SOD1    | ↑ / ns                |
| SOD2    | ↓                     |
| NQO1    | ↑                     |

**Figure S7. Concordance between qPCR and RNA-seq results.** The figure reports the observed gene expression differences in the comparison QUE + AFB1 vs AFB1. Green and red colours highlight when the two methods agreed or disagreed, respectively. ns: not significant; ne: not detected; ↑: upregulated; ↓: downregulated; \*by means of RNA-seq, this gene was induced with only marginal significance (i.e. FDR = 0.08).

**Table S1. Sequencing and mapping results.** The table reports the RNA-seq libraries sequenced, including for each of them: i) SRA accessions; ii) the number of raw reads obtained; iii) the number of reads after trimming and rRNAs removal; iv) the number of mapped reads (and the percentage of mapped reads).

| SRA accession | Sample ID  | Raw reads  | Reads after<br>trimming and<br>rRNAs removal | Reads mapping (%)   |
|---------------|------------|------------|----------------------------------------------|---------------------|
| SRR11586297   | PCB126_B   | 22,928,709 | 22,823,199                                   | 22,628,132 (99.15)  |
| SRR11586296   | PCB126_C   | 25,807,296 | 25,653,873                                   | 25,436,649 (99.15)  |
| SRR11586295   | PCB126_D   | 43,005,307 | 42,793,203                                   | 42,432,959 (99.16)  |
| SRR11586294   | AFB1_B     | 20,399,647 | 20,286,542                                   | 20,106,412 (99.11)  |
| SRR11586293   | AFB1_C     | 23,877,815 | 23,632,276                                   | 23,428,800 (99.14)  |
| SRR11586292   | AFB1_D     | 10,774,628 | 10,714,111                                   | 10,614,084 (99.07)  |
| SRR24958754   | QUE_B      | 25,116,232 | 24,972,157                                   | 24,723,237 (99.00)  |
| SRR24958753   | QUE_C      | 22,334,139 | 22,173,375                                   | 21,991,767 (99.18)  |
| SRR24958758   | QUE_D      | 24,530,040 | 24,401,397                                   | 24,193,093 (99.15)  |
| SRR24958757   | QUE+AFB1_B | 16,266,419 | 16,154,781                                   | 15,981,264 (98.193) |
| SRR24958756   | QUE+AFB1_C | 40,451,368 | 40,169,816                                   | 39,850,034 (99.20)  |
| SRR24958755   | QUE+AFB1_D | 21,003,875 | 20,887,979                                   | 20,701,925 (99.11)  |

AFB1: aflatoxin B1; ID: identity; PCB: polychlorinated biphenyls; QUE: quercetin
