# Supplementary material for: Discovering the Protective Effects of Quercetin on Aflatoxin B1-Induced Toxicity in Bovine Foetal Hepatocyte-Derived Cells (BFH12)
Source: Toxins (Basel). 2023 Sep 6;15(9):555. doi: 10.3390/toxins15090555 (PMC10534839; doi:10.3390/toxins15090555)
Supplement: Supplementary file 1 [file toxins-15-00555-s001.zip]

Archive with 4 entries (4 files):
- TableS2.xlsx
- TableS3.xlsx
- TableS4.xlsx
- toxins-2539258.supp.pdf
