# Supplementary material for: Discovering the Protective Effects of Quercetin on Aflatoxin B1-Induced Toxicity in Bovine Foetal Hepatocyte-Derived Cells (BFH12)
Source: Toxins (Basel). 2023 Sep 6;15(9):555. doi: 10.3390/toxins15090555 (PMC10534839; doi:10.3390/toxins15090555)
Supplement: Supplementary file 1 [file toxins-15-00555-s001.zip › TableS2.xlsx]

## Sheet: QUE vs CTRL
Table S2. Differential expression analysis. The table reports the EdgeR glmTreat output for the test performed (“QUE vs CTRL”). Ensembl gene ID, gene description, gene name, log2 fold change (logFC), mean log count per millions (logCPM), nominal p-value and false discovery rate (FDR) are reported for all the genes evaluated. Genes significantly (FDR ≤ 0.05; logFC ≥ 1) upregulated by QUE treatment…
Gene ID	Gene description	Gene name	logFC	logCPM	p-value	FDR
ENSBTAG00000034529	high mobility group AT-hook 1 [Source:VGNC Symbol;Acc:VGNC:29874]	HMGA1	3.34047	7.87746	1.67022e-10	1.10652e-06
ENSBTAG00000003313	TNF receptor superfamily member 9 [Source:VGNC Symbol;Acc:VGNC:36171]	TNFRSF9	5.13447	3.65656	1.27543e-10	1.10652e-06
ENSBTAG00000055207	stearoyl-CoA desaturase [Source:NCBI gene (formerly Entrezgene);Acc:280924]	SCD	3.22417	11.1567	3.40707e-10	1.12859e-06
ENSBTAG00000009617	solute carrier family 2 member 1 [Source:VGNC Symbol;Acc:VGNC:34796]	SLC2A1	4.72103	6.25323	2.89908e-10	1.12859e-06
ENSBTAG00000009997	anoctamin 1 [Source:VGNC Symbol;Acc:VGNC:50077]	ANO1	2.83333	6.82936	1.13725e-09	2.51142e-06
ENSBTAG00000005260	secreted phosphoprotein 1 [Source:VGNC Symbol;Acc:VGNC:35232]	SPP1	3.82054	6.70161	9.60848e-10	2.51142e-06
ENSBTAG00000015980	fatty acid synthase [Source:VGNC Symbol;Acc:VGNC:28871]	FASN	2.89746	10.7018	1.70298e-09	3.2235e-06
ENSBTAG00000021435	MAF bZIP transcription factor F [Source:VGNC Symbol;Acc:VGNC:31140]	MAFF	2.37088	6.86323	2.53304e-09	4.19535e-06
ENSBTAG00000006194	FOS like 1, AP-1 transcription factor subunit [Source:VGNC Symbol;Acc:VGNC:29075]	FOSL1	2.951	7.1092	3.78013e-09	4.30961e-06
ENSBTAG00000048511	#NA	#NA	3.50786	3.0544	3.79232e-09	4.30961e-06
ENSBTAG00000017461	solute carrier family 16 member 3 [Source:VGNC Symbol;Acc:VGNC:34689]	SLC16A3	3.89551	5.76217	3.90304e-09	4.30961e-06
ENSBTAG00000011677	H1.2 linker histone, cluster member [Source:VGNC Symbol;Acc:VGNC:83558]	H1-2	4.40003	3.80844	3.2e-09	4.30961e-06
ENSBTAG00000016819	fatty acid binding protein 3 [Source:VGNC Symbol;Acc:VGNC:28697]	FABP3	3.49824	6.02822	4.56087e-09	4.31653e-06
ENSBTAG00000004556	solute carrier family 2 member 3 [Source:NCBI gene (formerly Entrezgene);Acc:282358]	SLC2A3	3.19603	9.94657	6.77453e-09	5.61016e-06
ENSBTAG00000015505	fatty acid desaturase 2 [Source:VGNC Symbol;Acc:VGNC:28702]	FADS2	2.94355	7.47352	7.71568e-09	6.01369e-06
ENSBTAG00000032642	Glutathione S-transferase, alpha 3	GSTA3	8.32265	2.00123	1.14937e-08	8.46064e-06
ENSBTAG00000012314	low density lipoprotein receptor [Source:VGNC Symbol;Acc:VGNC:55214]	LDLR	3.24047	9.67916	1.39986e-08	9.76217e-06
ENSBTAG00000021739	natriuretic peptide B [Source:VGNC Symbol;Acc:VGNC:32211]	NPPB	4.84101	3.4939	1.84653e-08	1.16632e-05
ENSBTAG00000048916	lipase G, endothelial type [Source:NCBI gene (formerly Entrezgene);Acc:509808]	LIPG	3.76356	6.86564	2.02852e-08	1.22172e-05
ENSBTAG00000013095	forkhead box N1 [Source:VGNC Symbol;Acc:VGNC:29095]	FOXN1	2.98763	3.91182	2.36682e-08	1.3635e-05
ENSBTAG00000010030	EPH receptor A4 [Source:VGNC Symbol;Acc:VGNC:56106]	EPHA4	2.65799	6.71337	2.76672e-08	1.43005e-05
ENSBTAG00000021013	tubulin beta 4A class IVa [Source:VGNC Symbol;Acc:VGNC:36507]	TUBB4A	3.0339	5.45909	2.70641e-08	1.43005e-05
ENSBTAG00000021132	synaptopodin 2 like [Source:VGNC Symbol;Acc:VGNC:54495]	SYNPO2L	3.66632	3.43841	3.10911e-08	1.47128e-05
ENSBTAG00000000743	#NA	#NA	6.85401	3.14632	3.00074e-08	1.47128e-05
ENSBTAG00000018189	cystatin B (stefin B) [Source:NCBI gene (formerly Entrezgene);Acc:514170]	CSTB	2.34431	6.20405	4.55146e-08	1.92076e-05
ENSBTAG00000002922	GRB2 associated binding protein 2 [Source:NCBI gene (formerly Entrezgene);Acc:529346]	GAB2	2.48167	5.94361	4.75852e-08	1.92076e-05
ENSBTAG00000006546	glutathione S-transferase alpha 2 [Source:NCBI gene (formerly Entrezgene);Acc:281805]	GSTA2	3.01283	3.98168	4.78379e-08	1.92076e-05
ENSBTAG00000015716	endoplasmic reticulum oxidoreductase 1 alpha [Source:VGNC Symbol;Acc:VGNC:28594]	ERO1A	2.65421	8.07923	5.092e-08	1.94212e-05
ENSBTAG00000013303	acyl-CoA synthetase short chain family member 2 [Source:VGNC Symbol;Acc:VGNC:25571]	ACSS2	2.8579	7.60735	5.13012e-08	1.94212e-05
ENSBTAG00000007584	inositol polyphosphate-1-phosphatase [Source:VGNC Symbol;Acc:VGNC:30208]	INPP1	2.96045	3.44344	7.71647e-08	2.64597e-05
ENSBTAG00000046512	xin actin binding repeat containing 1 [Source:VGNC Symbol;Acc:VGNC:36985]	XIRP1	3.99576	3.48673	8.47974e-08	2.7404e-05
ENSBTAG00000021658	trafficking regulator and scaffold protein tamalin [Source:VGNC Symbol;Acc:VGNC:29628]	TAMALIN	2.53891	3.74846	1.08051e-07	3.19022e-05
ENSBTAG00000000585	lymphocyte antigen 6 family member G6C [Source:VGNC Symbol;Acc:VGNC:31090]	LY6G6C	3.4262	4.79508	1.08347e-07	3.19022e-05
ENSBTAG00000012646	phosphatidylinositol specific phospholipase C X domain containing 2 [Source:VGNC Symbol;Acc:VGNC:32993]	PLCXD2	2.92802	4.82698	1.15696e-07	3.21794e-05
ENSBTAG00000007732	cAMP regulated phosphoprotein 21 [Source:VGNC Symbol;Acc:VGNC:58588]	ARPP21	3.28063	6.08042	1.19003e-07	3.21794e-05
ENSBTAG00000001517	keratin 18 [Source:VGNC Symbol;Acc:VGNC:30719]	KRT18	2.81573	5.30948	1.36883e-07	3.55628e-05
ENSBTAG00000037673	glutathione S-transferase mu 1 [Source:NCBI gene (formerly Entrezgene);Acc:783879]	GSTM1	2.11003	3.70398	1.5467e-07	3.58253e-05
ENSBTAG00000013099	aldolase, fructose-bisphosphate C [Source:VGNC Symbol;Acc:VGNC:25823]	ALDOC	2.50525	5.24097	1.52117e-07	3.58253e-05
ENSBTAG00000031886	H2B clustered histone 15 [Source:VGNC Symbol;Acc:VGNC:83587]	H2BC15	2.59163	5.10137	1.50829e-07	3.58253e-05
ENSBTAG00000052382	H2B clustered histone 4 [Source:VGNC Symbol;Acc:VGNC:83556]	H2BC4	4.97736	2.98003	1.5682e-07	3.58253e-05
ENSBTAG00000019866	neuropilin 1 [Source:VGNC Symbol;Acc:VGNC:32266]	NRP1	2.46943	5.8068	1.75764e-07	3.85443e-05
ENSBTAG00000001592	insulin induced gene 1 [Source:VGNC Symbol;Acc:VGNC:30217]	INSIG1	2.91035	7.45403	1.79894e-07	3.85443e-05
ENSBTAG00000008428	uridine phosphorylase 1 [Source:VGNC Symbol;Acc:VGNC:36688]	UPP1	3.61266	3.85905	2.06629e-07	4.34577e-05
ENSBTAG00000013929	RRAD, Ras related glycolysis inhibitor and calcium channel regulator [Source:VGNC Symbol;Acc:VGNC:34158]	RRAD	4.09508	3.22265	2.13982e-07	4.43009e-05
ENSBTAG00000006132	DENN domain containing 3 [Source:VGNC Symbol;Acc:VGNC:27998]	DENND3	2.11318	6.4923	2.5524e-07	4.75479e-05
ENSBTAG00000006769	hydroxy-delta-5-steroid dehydrogenase, 3 beta- and steroid delta-isomerase 1 [Source:NCBI gene (formerly Entrezgene);Acc:281824]	HSD3B1	2.54363	3.94226	2.63741e-07	4.75479e-05
ENSBTAG00000013108	hexokinase 2 [Source:VGNC Symbol;Acc:VGNC:29865]	HK2	2.73843	6.73397	2.69139e-07	4.75479e-05
ENSBTAG00000017804	BCL2 interacting protein 3 [Source:VGNC Symbol;Acc:VGNC:26533]	BNIP3	3.2597	7.7623	2.52e-07	4.75479e-05
ENSBTAG00000009596	chromosome 8 C9orf43 homolog [Source:VGNC Symbol;Acc:VGNC:52741]	C8H9orf43	3.23035	3.0391	2.9098e-07	4.75986e-05
ENSBTAG00000012969	dickkopf WNT signaling pathway inhibitor 2 [Source:VGNC Symbol;Acc:VGNC:28080]	DKK2	3.55568	4.75728	2.8495e-07	4.75986e-05
ENSBTAG00000020049	#NA	#NA	4.63568	0.591894	3.231e-07	5.12253e-05
ENSBTAG00000051909	#NA	#NA	3.03745	1.98899	3.41659e-07	5.24263e-05
ENSBTAG00000014127	prostaglandin-endoperoxide synthase 2 [Source:VGNC Symbol;Acc:VGNC:33512]	PTGS2	2.81627	9.44635	3.91483e-07	5.66541e-05
ENSBTAG00000049861	BoWC1.1 [Source:NCBI gene (formerly Entrezgene);Acc:783109]	WC1	6.5997	0.459947	3.93372e-07	5.66541e-05
ENSBTAG00000011420	carbonic anhydrase 9 [Source:VGNC Symbol;Acc:VGNC:26659]	CA9	2.44706	7.37469	4.05427e-07	5.69848e-05
ENSBTAG00000049487	#NA	#NA	5.10645	0.681372	4.05225e-07	5.69848e-05
ENSBTAG00000010128	nucleosome assembly protein 1 like 5 [Source:VGNC Symbol;Acc:VGNC:31880]	NAP1L5	2.51732	4.76516	5.33683e-07	6.93264e-05
ENSBTAG00000001864	nuclear receptor subfamily 4 group A member 3 [Source:VGNC Symbol;Acc:VGNC:32247]	NR4A3	3.26238	5.4089	6.08177e-07	7.39297e-05
ENSBTAG00000017819	phosphomevalonate kinase [Source:VGNC Symbol;Acc:VGNC:33078]	PMVK	2.42801	4.61013	6.66837e-07	7.81911e-05
ENSBTAG00000007689	lipin 1 [Source:VGNC Symbol;Acc:VGNC:30966]	LPIN1	2.79751	5.46593	7.04267e-07	8.16922e-05
ENSBTAG00000007840	3-hydroxy-3-methylglutaryl-CoA reductase [Source:VGNC Symbol;Acc:VGNC:29879]	HMGCR	2.62142	8.90041	7.4727e-07	8.53563e-05
ENSBTAG00000000582	lymphocyte antigen 6 complex, locus G6E [Source:NCBI gene (formerly Entrezgene);Acc:512743]	LY6G6E	1.76037	6.13695	8.06514e-07	8.92909e-05
ENSBTAG00000008134	brain derived neurotrophic factor [Source:VGNC Symbol;Acc:VGNC:26461]	BDNF	2.3967	4.21511	8.08672e-07	8.92909e-05
ENSBTAG00000051719	#NA	#NA	2.97816	1.7286	8.08293e-07	8.92909e-05
ENSBTAG00000053073	#NA	#NA	4.82828	1.31528	8.8306e-07	9.60978e-05
ENSBTAG00000049048	#NA	#NA	4.32982	0.213094	9.24055e-07	9.95425e-05
ENSBTAG00000020700	chloride voltage-gated channel 6 [Source:VGNC Symbol;Acc:VGNC:27400]	CLCN6	2.14691	6.67646	9.67262e-07	0.000100915
ENSBTAG00000005339	vascular endothelial growth factor A [Source:VGNC Symbol;Acc:VGNC:55927]	VEGFA	2.045	8.39117	1.04346e-06	0.000106353
ENSBTAG00000016465	7-dehydrocholesterol reductase [Source:VGNC Symbol;Acc:VGNC:28034]	DHCR7	2.39371	8.55579	1.14791e-06	0.000111837
ENSBTAG00000025001	mitochondrial ribosomal protein L45 [Source:VGNC Symbol;Acc:VGNC:31640]	MRPL45	1.78034	6.83853	1.4724e-06	0.000132717
ENSBTAG00000012348	leucine rich repeat containing 71 [Source:VGNC Symbol;Acc:VGNC:31025]	LRRC71	2.3138	3.51754	1.54356e-06	0.000136348
ENSBTAG00000016014	nucleoporin 42 [Source:VGNC Symbol;Acc:VGNC:32368]	NUP42	1.85841	5.80637	1.78954e-06	0.000150289
ENSBTAG00000009863	basic helix-loop-helix family member e40 [Source:VGNC Symbol;Acc:VGNC:26486]	BHLHE40	2.21207	8.79671	1.79212e-06	0.000150289
ENSBTAG00000021336	kinesin family member 5A [Source:VGNC Symbol;Acc:VGNC:30605]	KIF5A	2.33083	2.4107	1.84023e-06	0.000152428
ENSBTAG00000055045	heat shock protein family B (small) member 7 [Source:VGNC Symbol;Acc:VGNC:49068]	HSPB7	3.50566	2.67381	1.85428e-06	0.000152604
ENSBTAG00000020116	MHC Class I JSP.1 [Source:NCBI gene (formerly Entrezgene);Acc:407173]	JSP.1	1.77487	5.2477	1.86918e-06	0.000152881
ENSBTAG00000040190	coiled-coil domain containing 88B [Source:VGNC Symbol;Acc:VGNC:26928]	CCDC88B	3.87318	4.84742	2.00853e-06	0.000160319
ENSBTAG00000013462	L1 cell adhesion molecule [Source:VGNC Symbol;Acc:VGNC:30760]	L1CAM	3.02782	4.42912	2.16328e-06	0.00016942
ENSBTAG00000004557	dehydrogenase/reductase 9 [Source:VGNC Symbol;Acc:VGNC:28046]	DHRS9	2.58464	5.46491	2.25302e-06	0.000172558
ENSBTAG00000010742	polycystin 2 like 1, transient receptor potential cation channel [Source:VGNC Symbol;Acc:VGNC:32936]	PKD2L1	2.89306	2.459	2.24043e-06	0.000172558
ENSBTAG00000012178	nuclear receptor subfamily 1 group D member 1 [Source:VGNC Symbol;Acc:VGNC:32228]	NR1D1	2.11444	3.99102	2.38753e-06	0.000178728
ENSBTAG00000016740	ATP citrate lyase [Source:VGNC Symbol;Acc:VGNC:25543]	ACLY	2.47852	9.04194	2.41868e-06	0.000180042
ENSBTAG00000001992	cytochrome P450, family 51, subfamily A, polypeptide 1 [Source:NCBI gene (formerly Entrezgene);Acc:505060]	CYP51A1	2.75357	8.82181	2.48893e-06	0.000183899
ENSBTAG00000055140	C-type lectin domain family 2, member B [Source:NCBI gene (formerly Entrezgene);Acc:100297496]	0	3.59198	4.34643	2.63773e-06	0.000192033
ENSBTAG00000019242	cholinergic receptor nicotinic beta 1 subunit [Source:VGNC Symbol;Acc:VGNC:27330]	CHRNB1	2.21553	4.58135	2.78748e-06	0.000197508
ENSBTAG00000024911	#NA	#NA	7.99184	-0.110972	2.77101e-06	0.000197508
ENSBTAG00000017509	myopalladin [Source:VGNC Symbol;Acc:VGNC:31843]	MYPN	4.09521	2.71022	2.81805e-06	0.000198613
ENSBTAG00000011839	3-hydroxy-3-methylglutaryl-CoA synthase 1 [Source:VGNC Symbol;Acc:VGNC:29880]	HMGCS1	3.54059	10.8173	2.85502e-06	0.000200154
ENSBTAG00000001078	sarcalumenin [Source:NCBI gene (formerly Entrezgene);Acc:513912]	SRL	3.39423	4.68012	2.90859e-06	0.000202836
ENSBTAG00000008366	SH3 and cysteine rich domain 2 [Source:VGNC Symbol;Acc:VGNC:35351]	STAC2	2.35955	3.27834	3.25196e-06	0.000215625
ENSBTAG00000023784	transmembrane protein 88B [Source:VGNC Symbol;Acc:VGNC:36121]	TMEM88B	2.7627	1.7069	3.40936e-06	0.000224674
ENSBTAG00000050417	apolipoprotein L3 [Source:NCBI gene (formerly Entrezgene);Acc:788334]	0	3.63373	0.836765	3.48068e-06	0.000227187
ENSBTAG00000021872	RAS guanyl releasing protein 1 [Source:VGNC Symbol;Acc:VGNC:33747]	RASGRP1	2.75591	2.35941	3.55422e-06	0.000230501
ENSBTAG00000025136	#NA	#NA	5.88334	1.75165	3.56624e-06	0.000230501
ENSBTAG00000054135	#NA	#NA	3.15111	2.64868	4.00488e-06	0.000251959
ENSBTAG00000001139	acetylcholinesterase (Cartwright blood group) [Source:NCBI gene (formerly Entrezgene);Acc:540446]	ACHE	3.46736	4.41687	4.07008e-06	0.00025438
ENSBTAG00000023026	serpin family B member 2-like [Source:NCBI gene (formerly Entrezgene);Acc:281376]	SERPINB2 like	3.25763	6.03202	4.15236e-06	0.000258304
ENSBTAG00000021145	mitogen-activated protein kinase kinase kinase kinase 1 [Source:VGNC Symbol;Acc:VGNC:31204]	MAP4K1	2.4056	2.31538	4.45351e-06	0.000275743
ENSBTAG00000007827	REST corepressor 2 [Source:VGNC Symbol;Acc:VGNC:33835]	RCOR2	2.71948	4.45104	4.66777e-06	0.000287665
ENSBTAG00000012931	phospholamban [Source:VGNC Symbol;Acc:VGNC:33038]	PLN	2.74097	3.8694	4.74516e-06	0.000288657
ENSBTAG00000000656	nuclear factor of activated T cells 1 [Source:VGNC Symbol;Acc:VGNC:32030]	NFATC1	2.02813	5.18336	4.82935e-06	0.000290859
ENSBTAG00000007036	solute carrier family 17 member 7 [Source:VGNC Symbol;Acc:VGNC:34702]	SLC17A7	2.73046	2.16209	4.98482e-06	0.000298864
ENSBTAG00000021818	adhesion G protein-coupled receptor E5 [Source:VGNC Symbol;Acc:VGNC:55196]	ADGRE5	1.79671	7.25568	5.1865e-06	0.000309242
ENSBTAG00000006999	#NA	#NA	4.48329	0.997418	5.2046e-06	0.000309242
ENSBTAG00000030674	adenylate kinase 4 [Source:VGNC Symbol;Acc:VGNC:25773]	AK4	2.15838	4.71401	5.57391e-06	0.000326789
ENSBTAG00000001618	alpha kinase 3 [Source:VGNC Symbol;Acc:VGNC:25849]	ALPK3	1.96763	5.44598	5.8754e-06	0.000338474
ENSBTAG00000054812	#NA	#NA	4.7642	1.42527	6.25227e-06	0.000354028
ENSBTAG00000054933	#NA	#NA	3.57825	0.277956	6.61076e-06	0.000370626
ENSBTAG00000050658	#NA	#NA	5.59364	0.0963605	6.60502e-06	0.000370626
ENSBTAG00000038715	#NA	#NA	5.88775	-0.195358	6.95581e-06	0.000384019
ENSBTAG00000048389	#NA	#NA	4.6084	-0.405845	7.32266e-06	0.000397645
ENSBTAG00000032787	nuclear RNA export factor 3 [Source:NCBI gene (formerly Entrezgene);Acc:785244]	0	3.39413	1.76583	7.75237e-06	0.000413423
ENSBTAG00000012432	farnesyl-diphosphate farnesyltransferase 1 [Source:VGNC Symbol;Acc:VGNC:56966]	FDFT1	1.8737	7.90767	7.91706e-06	0.000414629
ENSBTAG00000015715	#NA	#NA	4.09511	1.19933	7.90779e-06	0.000414629
ENSBTAG00000008143	serine/threonine kinase 17a [Source:VGNC Symbol;Acc:VGNC:53673]	STK17A	1.76719	6.41495	8.54696e-06	0.000440651
ENSBTAG00000005766	interleukin 4 induced 1 [Source:VGNC Symbol;Acc:VGNC:30162]	IL4I1	2.9818	1.55709	8.70984e-06	0.000442166
ENSBTAG00000019822	tubulin polymerization promoting protein family member 3 [Source:VGNC Symbol;Acc:VGNC:36260]	TPPP3	3.68931	3.4378	8.88337e-06	0.000449255
ENSBTAG00000006870	RasGEF domain family member 1A [Source:VGNC Symbol;Acc:VGNC:33743]	RASGEF1A	3.21106	2.73567	9.60576e-06	0.000479832
ENSBTAG00000054498	#NA	#NA	4.78006	-0.0417686	9.63286e-06	0.000479832
ENSBTAG00000053603	#NA	#NA	4.03198	0.0689249	9.83357e-06	0.000486174
ENSBTAG00000016944	adenosine A2a receptor [Source:VGNC Symbol;Acc:VGNC:25687]	ADORA2A	3.40329	1.31515	9.87427e-06	0.000486372
ENSBTAG00000013147	neurofilament heavy [Source:VGNC Symbol;Acc:VGNC:31985]	NEFH	2.12817	5.65493	1.01934e-05	0.000496554
ENSBTAG00000006859	#NA	#NA	4.98897	-0.0252893	1.02468e-05	0.000497324
ENSBTAG00000005498	squalene epoxidase [Source:VGNC Symbol;Acc:VGNC:35264]	SQLE	2.31	9.04649	1.03224e-05	0.000497352
ENSBTAG00000031503	NDUFA4 mitochondrial complex associated like 2 [Source:VGNC Symbol;Acc:VGNC:31948]	NDUFA4L2	3.21917	3.3996	1.10518e-05	0.000522985
ENSBTAG00000019993	#NA	#NA	5.80932	0.0278501	1.11524e-05	0.000525868
ENSBTAG00000004878	CaM kinase like vesicle associated [Source:VGNC Symbol;Acc:VGNC:26728]	CAMKV	2.6176	2.07619	1.12516e-05	0.000528665
ENSBTAG00000012737	G protein-coupled receptor 65 [Source:VGNC Symbol;Acc:VGNC:29596]	GPR65	2.70403	3.29772	1.13684e-05	0.000531424
ENSBTAG00000025398	ubiquitin D [Source:NCBI gene (formerly Entrezgene);Acc:504548]	0	3.14859	0.358762	1.13905e-05	0.000531424
ENSBTAG00000015311	protein tyrosine phosphatase receptor type R [Source:VGNC Symbol;Acc:VGNC:33557]	PTPRR	2.50252	5.93199	1.16218e-05	0.000538492
ENSBTAG00000019246	sterol-C5-desaturase [Source:VGNC Symbol;Acc:VGNC:34312]	SC5D	2.52915	8.18518	1.18342e-05	0.000546352
ENSBTAG00000005738	ATPase phospholipid transporting 8B1 [Source:VGNC Symbol;Acc:VGNC:26330]	ATP8B1	2.08278	6.07588	1.24392e-05	0.000568344
ENSBTAG00000023429	plastin 1 [Source:VGNC Symbol;Acc:VGNC:33051]	PLS1	2.0996	7.88224	1.30622e-05	0.000590695
ENSBTAG00000032996	prolyl 4-hydroxylase subunit alpha 1 [Source:VGNC Symbol;Acc:VGNC:32535]	P4HA1	2.16513	8.27611	1.35891e-05	0.00061036
ENSBTAG00000025748	#NA	#NA	7.3547	2.21292	1.36945e-05	0.000613012
ENSBTAG00000008951	alkaline phosphatase, biomineralization associated [Source:VGNC Symbol;Acc:VGNC:25850]	ALPL	2.90049	2.59038	1.41162e-05	0.000627652
ENSBTAG00000012451	major histocompatibility complex, class II, DM beta [Source:NCBI gene (formerly Entrezgene);Acc:282491]	BOLA-DMB	3.5744	2.13781	1.41776e-05	0.000628271
ENSBTAG00000012265	von Willebrand factor [Source:VGNC Symbol;Acc:VGNC:36860]	VWF	2.73486	3.70292	1.43028e-05	0.000631707
ENSBTAG00000004587	dual specificity phosphatase 6 [Source:VGNC Symbol;Acc:VGNC:28262]	DUSP6	1.72033	6.48731	1.46398e-05	0.000640764
ENSBTAG00000025826	solute carrier family 24 member 1 [Source:VGNC Symbol;Acc:VGNC:34736]	SLC24A1	2.62087	1.7171	1.45895e-05	0.000640764
ENSBTAG00000002631	sodium channel epithelial 1 subunit alpha [Source:VGNC Symbol;Acc:VGNC:49961]	SCNN1A	2.63537	2.90968	1.54172e-05	0.000669762
ENSBTAG00000039524	#NA	#NA	3.8594	2.23205	1.5993e-05	0.000692507
ENSBTAG00000012104	forkhead box A3 [Source:VGNC Symbol;Acc:VGNC:29079]	FOXA3	2.19063	2.59345	1.77653e-05	0.000749649
ENSBTAG00000037721	#NA	#NA	3.16058	0.594674	1.77522e-05	0.000749649
ENSBTAG00000005261	Fc fragment of IgG binding protein [Source:NCBI gene (formerly Entrezgene);Acc:534348]	0	3.31724	1.46016	1.88921e-05	0.000787897
ENSBTAG00000007502	creatine kinase, mitochondrial 1A [Source:NCBI gene (formerly Entrezgene);Acc:281692]	CKMT1A	2.53376	3.67991	1.92574e-05	0.000796983
ENSBTAG00000019975	interleukin 7 receptor [Source:VGNC Symbol;Acc:VGNC:30170]	IL7R	3.08984	3.59134	1.91887e-05	0.000796983
ENSBTAG00000000087	hydroxysteroid 17-beta dehydrogenase 12 [Source:VGNC Symbol;Acc:VGNC:54883]	HSD17B12	1.94715	6.86798	1.98683e-05	0.000815029
ENSBTAG00000021487	circadian associated repressor of transcription [Source:VGNC Symbol;Acc:VGNC:27358]	CIART	2.37196	4.56475	1.99793e-05	0.000817056
ENSBTAG00000012671	TNFAIP3 interacting protein 1 [Source:VGNC Symbol;Acc:VGNC:36180]	TNIP1	1.64752	7.89449	2.0929e-05	0.000849795
ENSBTAG00000021029	proline rich 5 like [Source:VGNC Symbol;Acc:VGNC:33401]	PRR5L	1.87813	3.88232	2.28862e-05	0.000902506
ENSBTAG00000003959	Rho GTPase activating protein 24 [Source:VGNC Symbol;Acc:VGNC:26082]	ARHGAP24	2.30031	7.36157	2.36247e-05	0.000926115
ENSBTAG00000039657	#NA	#NA	3.69487	1.02086	2.38179e-05	0.000928199
ENSBTAG00000002583	dynein axonemal light intermediate chain 1 [Source:VGNC Symbol;Acc:VGNC:28131]	DNALI1	2.56123	1.68435	2.44809e-05	0.000951236
ENSBTAG00000005845	mannose phosphate isomerase [Source:VGNC Symbol;Acc:VGNC:50218]	MPI	1.72697	5.82471	2.54968e-05	0.000984928
ENSBTAG00000049965	#NA	#NA	5.63265	-0.659874	2.57944e-05	0.000990656
ENSBTAG00000008172	egl-9 family hypoxia inducible factor 3 [Source:VGNC Symbol;Acc:VGNC:28367]	EGLN3	2.15119	3.33827	2.6677e-05	0.00101865
ENSBTAG00000039335	arrestin domain containing 2 [Source:VGNC Symbol;Acc:VGNC:26172]	ARRDC2	2.02991	4.91063	2.6857e-05	0.00102038
ENSBTAG00000006193	interleukin 1 receptor associated kinase 2 [Source:VGNC Symbol;Acc:VGNC:30266]	IRAK2	1.86855	3.88181	3.00735e-05	0.00113203
ENSBTAG00000004118	5'-aminolevulinate synthase 1 [Source:VGNC Symbol;Acc:VGNC:25803]	ALAS1	1.59249	6.71984	3.18783e-05	0.00118316
ENSBTAG00000007799	mitochondrial fission regulator 2 [Source:VGNC Symbol;Acc:VGNC:31728]	MTFR2	1.59994	6.35001	3.31592e-05	0.00122384
ENSBTAG00000018164	fibronectin type III domain containing 4 [Source:VGNC Symbol;Acc:VGNC:29064]	FNDC4	2.0745	3.3258	3.35728e-05	0.00123079
ENSBTAG00000050252	#NA	#NA	2.67937	1.41367	3.36772e-05	0.00123079
ENSBTAG00000049333	tumor necrosis factor alpha-induced protein 2-like [Source:NCBI gene (formerly Entrezgene);Acc:112443175]	0	3.34923	1.9594	3.62202e-05	0.00130768
ENSBTAG00000034712	RAB33A, member RAS oncogene family [Source:VGNC Symbol;Acc:VGNC:33642]	RAB33A	2.98476	1.2882	3.69014e-05	0.00132454
ENSBTAG00000051588	tumor necrosis factor receptor superfamily member 10A [Source:NCBI gene (formerly Entrezgene);Acc:784541]	0	1.72423	4.43234	3.72888e-05	0.00133174
ENSBTAG00000018986	acyl-CoA synthetase long chain family member 4 [Source:VGNC Symbol;Acc:VGNC:25566]	ACSL4	1.96762	7.63198	3.77916e-05	0.0013444
ENSBTAG00000003074	solute carrier family 16 member 6 [Source:VGNC Symbol;Acc:VGNC:34692]	SLC16A6	2.47458	4.12391	3.78847e-05	0.0013444
ENSBTAG00000001294	protein phosphatase 1 regulatory subunit 15A [Source:VGNC Symbol;Acc:VGNC:33228]	PPP1R15A	2.07501	5.88111	3.90151e-05	0.00137487
ENSBTAG00000049022	#NA	#NA	6.87817	-1.04808	3.92629e-05	0.00137777
ENSBTAG00000002341	ETS proto-oncogene 1, transcription factor [Source:VGNC Symbol;Acc:VGNC:28626]	ETS1	1.63493	7.22023	3.98404e-05	0.00139284
ENSBTAG00000015195	NPC intracellular cholesterol transporter 1 [Source:VGNC Symbol;Acc:VGNC:32194]	NPC1	1.6662	6.52276	4.00348e-05	0.00139595
ENSBTAG00000019213	cyclin and CBS domain divalent metal cation transport mediator 4 [Source:VGNC Symbol;Acc:VGNC:27513]	CNNM4	1.54893	6.11927	4.03927e-05	0.00140106
ENSBTAG00000007969	cell death inducing DFFA like effector c [Source:VGNC Symbol;Acc:VGNC:27365]	CIDEC	2.8267	1.43464	4.203e-05	0.00143901
ENSBTAG00000009349	#NA	#NA	4.002	-0.499856	4.33284e-05	0.00147584
ENSBTAG00000007336	#NA	#NA	3.32987	-0.702897	4.59141e-05	0.00155591
ENSBTAG00000053863	#NA	#NA	2.81578	0.108704	4.60662e-05	0.00155709
ENSBTAG00000014020	rhotekin 2 [Source:VGNC Symbol;Acc:VGNC:34198]	RTKN2	2.24845	5.35286	4.77415e-05	0.00159574
ENSBTAG00000002527	zinc finger SWIM-type containing 4 [Source:VGNC Symbol;Acc:VGNC:37384]	ZSWIM4	1.8847	5.69714	4.79977e-05	0.00159791
ENSBTAG00000008105	RNA binding motif protein 38 [Source:VGNC Symbol;Acc:VGNC:33798]	RBM38	1.92165	4.74051	5.04593e-05	0.00166315
ENSBTAG00000005504	tumor protein p53 inducible nuclear protein 2 [Source:VGNC Symbol;Acc:VGNC:36237]	TP53INP2	1.84662	5.35147	5.09214e-05	0.00167421
ENSBTAG00000052352	#NA	#NA	2.71111	-0.21434	5.16751e-05	0.00169479
ENSBTAG00000013921	#NA	#NA	2.911	0.00245799	5.26508e-05	0.00171406
ENSBTAG00000039050	purinergic receptor P2Y2 [Source:VGNC Symbol;Acc:VGNC:32528]	P2RY2	2.03799	5.42826	5.31625e-05	0.00172648
ENSBTAG00000010634	neuron derived neurotrophic factor [Source:VGNC Symbol;Acc:VGNC:31937]	NDNF	1.78828	4.73718	5.34835e-05	0.00173266
ENSBTAG00000055098	#NA	#NA	2.85163	0.683054	5.43386e-05	0.00175179
ENSBTAG00000051898	fibroblast growth factor 7 [Source:NCBI gene (formerly Entrezgene);Acc:616885]	FGF7	3.98012	0.246465	5.49534e-05	0.00176731
ENSBTAG00000024492	tyrosine-protein phosphatase non-receptor type 11 [Source:NCBI gene (formerly Entrezgene);Acc:526769]	0	4.19918	4.45689	5.55175e-05	0.00178113
ENSBTAG00000020269	#NA	#NA	3.15004	0.0301346	5.56759e-05	0.0017819
ENSBTAG00000001823	stanniocalcin 2 [Source:VGNC Symbol;Acc:VGNC:35378]	STC2	2.1861	5.32704	5.68204e-05	0.00180979
ENSBTAG00000007353	distal-less homeobox 4 [Source:VGNC Symbol;Acc:VGNC:28100]	DLX4	1.97776	4.44198	5.77959e-05	0.00183205
ENSBTAG00000018773	Rho family GTPase 1 [Source:VGNC Symbol;Acc:VGNC:34004]	RND1	1.88777	4.42632	6.07928e-05	0.00191331
ENSBTAG00000048508	inhibin subunit beta A [Source:NCBI gene (formerly Entrezgene);Acc:281867]	INHBA	2.24311	6.71018	6.22674e-05	0.00195046
ENSBTAG00000032193	regenerating family member 4 [Source:VGNC Symbol;Acc:VGNC:55669]	REG4	4.55033	1.11406	6.43925e-05	0.00199813
ENSBTAG00000054065	#NA	#NA	4.99996	0.09796	6.81828e-05	0.00209611
ENSBTAG00000003220	atypical chemokine receptor 1 [Source:VGNC Symbol;Acc:VGNC:58436]	ACKR1	2.36988	1.34143	7.11344e-05	0.00218179
ENSBTAG00000003068	methylsterol monooxygenase 1 [Source:VGNC Symbol;Acc:VGNC:31701]	MSMO1	2.11068	8.27035	7.48004e-05	0.00228365
ENSBTAG00000045901	claudin 6 [Source:VGNC Symbol;Acc:VGNC:27418]	CLDN6	3.89348	-0.163442	7.52201e-05	0.00228593
ENSBTAG00000007424	LIF interleukin 6 family cytokine [Source:VGNC Symbol;Acc:VGNC:30880]	LIF	2.1352	5.7582	7.58397e-05	0.00228901
ENSBTAG00000019437	schlafen family member 11 [Source:NCBI gene (formerly Entrezgene);Acc:521795]	SLFN11	2.48093	3.97847	7.76292e-05	0.0023377
ENSBTAG00000009903	patched 1 [Source:NCBI gene (formerly Entrezgene);Acc:520994]	PTCH1	1.96277	3.56318	7.99027e-05	0.00239773
ENSBTAG00000003923	G protein-coupled bile acid receptor 1 [Source:VGNC Symbol;Acc:VGNC:29521]	GPBAR1	3.34387	1.75384	8.01583e-05	0.00239773
ENSBTAG00000005386	#NA	#NA	3.04893	0.16724	8.08967e-05	0.00241415
ENSBTAG00000023179	tribbles pseudokinase 1 [Source:VGNC Symbol;Acc:VGNC:36308]	TRIB1	1.70012	6.52219	8.14437e-05	0.00242501
ENSBTAG00000014882	DNA methyltransferase 3 like [Source:NCBI gene (formerly Entrezgene);Acc:613785]	0	3.18106	0.132796	8.31215e-05	0.00246389
ENSBTAG00000021933	arachidonate 12-lipoxygenase, 12S type [Source:VGNC Symbol;Acc:VGNC:25841]	ALOX12	3.26621	1.14266	8.35342e-05	0.0024665
ENSBTAG00000015493	#NA	#NA	4.01437	1.56499	8.71109e-05	0.00255925
ENSBTAG00000032719	transferrin receptor [Source:VGNC Symbol;Acc:VGNC:35797]	TFRC	2.01738	8.67374	8.96423e-05	0.00261621
ENSBTAG00000019788	TEA domain transcription factor 4 [Source:VGNC Symbol;Acc:VGNC:35727]	TEAD4	1.45553	6.11699	9.19995e-05	0.00267323
ENSBTAG00000001950	retinol dehydrogenase 11 [Source:VGNC Symbol;Acc:VGNC:55139]	RDH11	1.55491	6.33944	9.39037e-05	0.00271665
ENSBTAG00000052841	TAFA chemokine like family member 3 [Source:NCBI gene (formerly Entrezgene);Acc:510868]	0	2.20035	1.99941	9.37597e-05	0.00271665
ENSBTAG00000032122	CD19 molecule [Source:VGNC Symbol;Acc:VGNC:27007]	CD19	2.02412	4.25836	9.61018e-05	0.00277418
ENSBTAG00000020355	Kruppel like factor 4 [Source:VGNC Symbol;Acc:VGNC:52790]	KLF4	1.67631	4.62027	9.75921e-05	0.00279591
ENSBTAG00000020209	tigger transposable element derived 7 [Source:VGNC Symbol;Acc:VGNC:54500]	TIGD7	2.3514	2.58284	9.74253e-05	0.00279591
ENSBTAG00000019741	complement C3a receptor 1 [Source:VGNC Symbol;Acc:VGNC:26639]	C3AR1	2.94286	0.564531	9.77087e-05	0.00279591
ENSBTAG00000010630	abhydrolase domain containing 18 [Source:VGNC Symbol;Acc:VGNC:25499]	ABHD18	1.86263	5.57557	0.000100643	0.00284941
ENSBTAG00000024509	transmembrane protein 52 [Source:VGNC Symbol;Acc:VGNC:59369]	TMEM52	2.41766	1.14592	0.000100504	0.00284941
ENSBTAG00000052516	cytidine deaminase [Source:NCBI gene (formerly Entrezgene);Acc:616377]	CDA	3.17958	3.33104	0.000101819	0.00287656
ENSBTAG00000039035	heat shock protein family A (Hsp70) member 6 [Source:VGNC Symbol;Acc:VGNC:55236]	HSPA6	4.70721	2.04079	0.000104347	0.00292923
ENSBTAG00000006121	#NA	#NA	4.43486	-0.10817	0.000108609	0.00304242
ENSBTAG00000053661	#NA	#NA	3.13391	1.20804	0.000112536	0.00313072
ENSBTAG00000014265	sterol regulatory element binding transcription factor 2 [Source:VGNC Symbol;Acc:VGNC:35275]	SREBF2	1.55751	9.06409	0.000114182	0.00315849
ENSBTAG00000012280	#NA	#NA	3.14886	0.088251	0.000115248	0.00318133
ENSBTAG00000048783	#NA	#NA	2.79077	3.47452	0.000115767	0.00318238
ENSBTAG00000037964	H2A.W histone [Source:VGNC Symbol;Acc:VGNC:83612]	H2AW	3.13123	1.42722	0.000116546	0.00319718
ENSBTAG00000000894	phosphoglycerate kinase 1 [Source:VGNC Symbol;Acc:VGNC:32789]	PGK1	1.6813	9.49747	0.000120319	0.00328996
ENSBTAG00000055250	#NA	#NA	4.49963	-0.608458	0.000120425	0.00328996
ENSBTAG00000001063	homeobox A4 [Source:VGNC Symbol;Acc:VGNC:29912]	HOXA4	2.27306	3.61611	0.000120771	0.00329262
ENSBTAG00000021752	DnaJ heat shock protein family (Hsp40) member B4 [Source:VGNC Symbol;Acc:VGNC:55166]	DNAJB4	1.77564	7.11985	0.000124764	0.00337372
ENSBTAG00000039302	angiopoietin like 6 [Source:VGNC Symbol;Acc:VGNC:25894]	ANGPTL6	2.03103	1.84944	0.000126167	0.00339758
ENSBTAG00000011140	family with sequence similarity 162 member A [Source:VGNC Symbol;Acc:VGNC:28744]	FAM162A	1.71357	6.35649	0.000127503	0.00341295
ENSBTAG00000007204	keratin 80 [Source:VGNC Symbol;Acc:VGNC:30742]	KRT80	1.86855	6.36432	0.000128083	0.00342157
ENSBTAG00000006851	#NA	#NA	5.03178	-0.253539	0.00013208	0.00350012
ENSBTAG00000004075	isopentenyl-diphosphate delta isomerase 1 [Source:NCBI gene (formerly Entrezgene);Acc:514293]	IDI1	2.27283	8.241	0.000138916	0.00365206
ENSBTAG00000037429	5-hydroxytryptamine receptor 1B [Source:VGNC Symbol;Acc:VGNC:29992]	HTR1B	2.1756	3.921	0.000144393	0.00378105
ENSBTAG00000008330	ring finger protein 19B [Source:VGNC Symbol;Acc:VGNC:34045]	RNF19B	1.54031	6.55997	0.000144777	0.00378361
ENSBTAG00000017263	MAX interactor 1, dimerization protein [Source:VGNC Symbol;Acc:VGNC:31773]	MXI1	1.95026	4.07071	0.000146039	0.00380908
ENSBTAG00000005700	mitogen-activated protein kinase kinase kinase 9 [Source:VGNC Symbol;Acc:VGNC:31203]	MAP3K9	1.63498	4.22192	0.000146683	0.00381837
ENSBTAG00000012817	jagged canonical Notch ligand 1 [Source:VGNC Symbol;Acc:VGNC:30361]	JAG1	1.76048	3.17008	0.000149614	0.00387942
ENSBTAG00000038486	putative UDP-GlcNAc:betaGal beta-1,3-N-acetylglucosaminyltransferase LOC100288842 [Source:NCBI gene (formerly Entrezgene);Acc:101904668]	B3GNT10	2.59037	1.29586	0.000153216	0.00395734
ENSBTAG00000052148	#NA	#NA	4.36904	0.231576	0.00015598	0.00401307
ENSBTAG00000013411	enolase 1 [Source:VGNC Symbol;Acc:VGNC:97268]	ENO1	1.68737	11.389	0.000168435	0.00426722
ENSBTAG00000017318	transmembrane protein 178A [Source:VGNC Symbol;Acc:VGNC:36003]	TMEM178A	2.4461	1.77929	0.00017559	0.00444001
ENSBTAG00000031871	NFKB activating protein like [Source:VGNC Symbol;Acc:VGNC:54230]	NKAPL	2.19475	4.4159	0.000178529	0.00450572
ENSBTAG00000039819	rabphilin 3A like (without C2 domains) [Source:NCBI gene (formerly Entrezgene);Acc:617294]	RPH3AL	1.97817	2.34629	0.000182247	0.00458212
ENSBTAG00000020755	selectin P [Source:VGNC Symbol;Acc:VGNC:34424]	SELP	3.59705	1.33833	0.000182085	0.00458212
ENSBTAG00000052443	#NA	#NA	1.70468	3.13857	0.000190114	0.00476184
ENSBTAG00000002069	MHC class I heavy chain [Source:NCBI gene (formerly Entrezgene);Acc:515712]	BOLA	1.53302	6.28418	0.000194766	0.00486914
ENSBTAG00000025099	ring finger protein 145 [Source:VGNC Symbol;Acc:VGNC:34028]	RNF145	1.42398	8.65441	0.000196447	0.00488507
ENSBTAG00000008816	tripartite motif containing 2 [Source:VGNC Symbol;Acc:VGNC:36318]	TRIM2	1.75608	5.67747	0.000200042	0.00495432
ENSBTAG00000054274	#NA	#NA	3.21984	0.937252	0.000202171	0.0049977
ENSBTAG00000010236	cell death inducing DFFA like effector b [Source:VGNC Symbol;Acc:VGNC:27364]	CIDEB	2.05187	2.58683	0.00020399	0.0050146
ENSBTAG00000054345	#NA	#NA	3.66738	-0.765558	0.000203351	0.0050146
ENSBTAG00000039355	mucosal vascular addressin cell adhesion molecule 1 [Source:VGNC Symbol;Acc:VGNC:31133]	MADCAM1	3.7835	0.70374	0.000207461	0.00506236
ENSBTAG00000011274	enolase 2 [Source:VGNC Symbol;Acc:VGNC:28497]	ENO2	2.4384	3.0569	0.000209429	0.00510099
ENSBTAG00000012046	JunB proto-oncogene, AP-1 transcription factor subunit [Source:VGNC Symbol;Acc:VGNC:30387]	JUNB	1.92151	7.4847	0.000210553	0.00511895
ENSBTAG00000010349	interleukin 1 alpha [Source:VGNC Symbol;Acc:VGNC:30130]	IL1A	3.10763	1.98792	0.000214117	0.00517709
ENSBTAG00000024381	mannosidase alpha class 1A member 1 [Source:VGNC Symbol;Acc:VGNC:31161]	MAN1A1	1.49072	7.61621	0.000227965	0.00542286
ENSBTAG00000010716	Fraser extracellular matrix complex subunit 1 [Source:VGNC Symbol;Acc:VGNC:59334]	FRAS1	1.96482	5.76175	0.000227835	0.00542286
ENSBTAG00000010644	carbohydrate sulfotransferase 11 [Source:VGNC Symbol;Acc:VGNC:27339]	CHST11	2.24541	0.802002	0.000228567	0.00542745
ENSBTAG00000046742	#NA	#NA	3.50166	-0.916071	0.000236807	0.00559112
ENSBTAG00000017322	#NA	#NA	6.07475	-1.17332	0.0002368	0.00559112
ENSBTAG00000004630	cartilage oligomeric matrix protein [Source:VGNC Symbol;Acc:VGNC:27590]	COMP	2.41045	1.79169	0.000244814	0.00572097
ENSBTAG00000053194	#NA	#NA	2.05525	0.991803	0.00024769	0.00574763
ENSBTAG00000050527	#NA	#NA	3.33958	4.13906	0.000247135	0.00574763
ENSBTAG00000003434	ceramide synthase 4 [Source:VGNC Symbol;Acc:VGNC:27226]	CERS4	5.07156	-0.227387	0.000249228	0.00577319
ENSBTAG00000008908	GDNF inducible zinc finger protein 1 [Source:VGNC Symbol;Acc:VGNC:29732]	GZF1	1.57968	5.64579	0.000251885	0.00581441
ENSBTAG00000052187	#NA	#NA	5.02069	-0.823142	0.000253297	0.00583684
ENSBTAG00000051116	chromosome 23 C6orf132 homolog [Source:VGNC Symbol;Acc:VGNC:53962]	C23H6orf132	2.3857	1.5207	0.000256796	0.00589093
ENSBTAG00000006861	chromosome 11 C2orf73 homolog [Source:VGNC Symbol;Acc:VGNC:52620]	C11H2orf73	3.46734	-0.509693	0.000256978	0.00589093
ENSBTAG00000004046	deltex E3 ubiquitin ligase 4 [Source:VGNC Symbol;Acc:VGNC:54867]	DTX4	1.85364	3.46856	0.000260162	0.00594462
ENSBTAG00000054382	#NA	#NA	2.60544	-0.678693	0.000260655	0.00594462
ENSBTAG00000053467	#NA	#NA	2.91382	-0.378621	0.000262038	0.00596565
ENSBTAG00000014944	#NA	#NA	2.98725	0.512289	0.000267657	0.0060727
ENSBTAG00000014390	myotubularin related protein 9-like [Source:NCBI gene (formerly Entrezgene);Acc:521746]	MTMR9	1.74305	2.3665	0.000268982	0.00609232
ENSBTAG00000010635	RAB3A, member RAS oncogene family [Source:VGNC Symbol;Acc:VGNC:33649]	RAB3A	1.81929	3.31706	0.000271517	0.00610225
ENSBTAG00000013888	forkhead box A1 [Source:VGNC Symbol;Acc:VGNC:29077]	FOXA1	1.85386	5.84425	0.000271118	0.00610225
ENSBTAG00000013556	unc-13 homolog D [Source:VGNC Symbol;Acc:VGNC:36666]	UNC13D	2.23624	5.97782	0.00027127	0.00610225
ENSBTAG00000051381	ring finger protein 227 [Source:NCBI gene (formerly Entrezgene);Acc:107131406]	RNF227	2.51634	0.978176	0.000272183	0.00610225
ENSBTAG00000038600	leucine rich repeat containing 15 [Source:VGNC Symbol;Acc:VGNC:31001]	LRRC15	2.83357	0.415402	0.000285238	0.00633067
ENSBTAG00000018299	phosphatidylinositol glycan anchor biosynthesis class H [Source:VGNC Symbol;Acc:VGNC:32869]	PIGH	1.68655	3.42086	0.00028604	0.00633784
ENSBTAG00000005042	synapsin I [Source:NCBI gene (formerly Entrezgene);Acc:281510]	SYN1	1.84277	3.95003	0.000303939	0.00667859
ENSBTAG00000045757	troponin C1, slow skeletal and cardiac type [Source:VGNC Symbol;Acc:VGNC:36189]	TNNC1	1.64046	3.9245	0.000305102	0.00668192
ENSBTAG00000023730	tubulin beta 3 class III [Source:NCBI gene (formerly Entrezgene);Acc:768070]	TUBB3	2.13935	4.49041	0.000305603	0.00668192
ENSBTAG00000047955	zinc finger protein 774 [Source:VGNC Symbol;Acc:VGNC:50169]	ZNF774	1.52672	3.21981	0.000326111	0.00706312
ENSBTAG00000052140	allograft inflammatory factor 1 like [Source:VGNC Symbol;Acc:VGNC:25760]	AIF1L	1.63302	7.11538	0.000326236	0.00706312
ENSBTAG00000019920	BICD family like cargo adaptor 2 [Source:VGNC Symbol;Acc:VGNC:26493]	BICDL2	1.84824	1.6085	0.000328007	0.00708988
ENSBTAG00000001687	#NA	#NA	6.92707	-0.716556	0.000330947	0.00714176
ENSBTAG00000005189	#NA	#NA	3.48587	-0.715056	0.000335301	0.00722397
ENSBTAG00000014969	cartilage intermediate layer protein 2 [Source:VGNC Symbol;Acc:VGNC:27367]	CILP2	2.34641	3.26029	0.000336911	0.00724687
ENSBTAG00000000744	dynactin subunit 6 [Source:VGNC Symbol;Acc:VGNC:27933]	DCTN6	1.46879	6.68951	0.000338782	0.00727529
ENSBTAG00000021841	chromodomain helicase DNA binding protein 7 [Source:VGNC Symbol;Acc:VGNC:27282]	CHD7	1.62333	5.28765	0.000350195	0.00743604
ENSBTAG00000015618	growth differentiation factor 15 [Source:VGNC Symbol;Acc:VGNC:29301]	GDF15	1.68689	7.18103	0.00036066	0.00763587
ENSBTAG00000046172	quinone oxidoreductase-like protein 2 [Source:NCBI gene (formerly Entrezgene);Acc:100299281]	0	1.68731	4.80098	0.000361713	0.00764385
ENSBTAG00000005667	#NA	#NA	2.56406	0.58414	0.000363898	0.00767778
ENSBTAG00000009457	#NA	#NA	3.16116	-0.867144	0.000375768	0.00786812
ENSBTAG00000014062	#NA	#NA	3.96254	-1.1485	0.000375888	0.00786812
ENSBTAG00000009405	transient receptor potential cation channel subfamily C member 4 [Source:VGNC Symbol;Acc:VGNC:36383]	TRPC4	1.81171	4.75781	0.00037891	0.00791169
ENSBTAG00000045588	bone marrow stromal antigen 2 [Source:NCBI gene (formerly Entrezgene);Acc:100298356]	0	1.91189	1.02073	0.000382798	0.00796243
ENSBTAG00000012518	protocadherin 1 [Source:VGNC Symbol;Acc:VGNC:32615]	PCDH1	1.67167	6.75985	0.000386104	0.00801862
ENSBTAG00000011981	MYB proto-oncogene like 1 [Source:VGNC Symbol;Acc:VGNC:31778]	MYBL1	1.59121	6.83455	0.000388805	0.00806207
ENSBTAG00000031778	H2B clustered histone 5 [Source:VGNC Symbol;Acc:VGNC:83560]	H2BC5	2.27846	3.18654	0.000400033	0.00826901
ENSBTAG00000010532	potassium channel tetramerization domain containing 11 [Source:VGNC Symbol;Acc:VGNC:30501]	KCTD11	1.37546	7.43647	0.000402552	0.00828231
ENSBTAG00000005034	calpain 5 [Source:VGNC Symbol;Acc:VGNC:26748]	CAPN5	1.53658	5.85573	0.000402478	0.00828231
ENSBTAG00000015313	CEA cell adhesion molecule 19 [Source:NCBI gene (formerly Entrezgene);Acc:511941]	CEACAM19	2.37742	2.08573	0.000401593	0.00828231
ENSBTAG00000018446	grancalcin [Source:VGNC Symbol;Acc:VGNC:29278]	GCA	2.08008	1.51319	0.000404407	0.00830758
ENSBTAG00000004222	spermidine/spermine N1-acetyltransferase family member 2 [Source:VGNC Symbol;Acc:VGNC:34297]	SAT2	1.91008	1.53518	0.000409315	0.00839539
ENSBTAG00000003199	solute carrier family 35 member C1 [Source:VGNC Symbol;Acc:VGNC:34827]	SLC35C1	1.81354	6.92863	0.000413213	0.00844918
ENSBTAG00000053558	notum, palmitoleoyl-protein carboxylesterase [Source:NCBI gene (formerly Entrezgene);Acc:525682]	NOTUM	1.85848	2.7261	0.00041289	0.00844918
ENSBTAG00000002144	adrenoceptor beta 2 [Source:VGNC Symbol;Acc:VGNC:25697]	ADRB2	2.77198	0.991364	0.000423666	0.00863626
ENSBTAG00000003948	farnesyl diphosphate synthase [Source:NCBI gene (formerly Entrezgene);Acc:281156]	FDPS	1.67068	7.24042	0.000425102	0.00865223
ENSBTAG00000046547	cell death inducing DFFA like effector a [Source:NCBI gene (formerly Entrezgene);Acc:527051]	CIDEA	2.64394	0.19417	0.000434189	0.00881011
ENSBTAG00000007273	transferrin [Source:NCBI gene (formerly Entrezgene);Acc:280705]	TF	1.62585	5.99677	0.000447032	0.00905684
ENSBTAG00000015246	#NA	#NA	4.30528	-1.15626	0.000449617	0.00909531
ENSBTAG00000010431	leucine rich adaptor protein 1 like [Source:VGNC Symbol;Acc:VGNC:31083]	LURAP1L	1.81836	2.91001	0.000459218	0.00923314
ENSBTAG00000012467	mannan binding lectin serine peptidase 1 [Source:VGNC Symbol;Acc:VGNC:31255]	MASP1	4.57314	-0.560498	0.00048257	0.0096296
ENSBTAG00000054195	glutathione peroxidase 1 [Source:NCBI gene (formerly Entrezgene);Acc:281209]	GPX1	1.51116	5.95146	0.000496016	0.0098534
ENSBTAG00000008220	chromosome 15 C11orf71 homolog [Source:VGNC Symbol;Acc:VGNC:54858]	C15H11orf71	2.24106	2.43894	0.000503899	0.00996517
ENSBTAG00000047996	#NA	#NA	5.16697	-1.05893	0.000508579	0.0100318
ENSBTAG00000024470	#NA	#NA	6.13613	-1.31241	0.000514065	0.0100909
ENSBTAG00000040067	homeodomain interacting protein kinase 4 [Source:VGNC Symbol;Acc:VGNC:29861]	HIPK4	2.05744	2.85902	0.000517239	0.0101382
ENSBTAG00000013702	zinc finger protein 296 [Source:VGNC Symbol;Acc:VGNC:37240]	ZNF296	2.28315	0.993273	0.000520985	0.0101815
ENSBTAG00000001032	glycogen phosphorylase, muscle associated [Source:VGNC Symbol;Acc:VGNC:33589]	PYGM	2.31925	-0.0961281	0.000549329	0.0105794
ENSBTAG00000045862	fermitin family member 3 [Source:NCBI gene (formerly Entrezgene);Acc:525159]	FERMT3	2.14525	2.34544	0.000552786	0.0105997
ENSBTAG00000014334	zinc finger FYVE-type containing 26 [Source:VGNC Symbol;Acc:VGNC:37176]	ZFYVE26	1.85757	7.40508	0.000555786	0.0106419
ENSBTAG00000001444	tenascin XB [Source:VGNC Symbol;Acc:VGNC:36211]	TNXB	1.69182	7.81028	0.00056238	0.0107526
ENSBTAG00000009844	cellular communication network factor 1 [Source:VGNC Symbol;Acc:VGNC:50270]	CCN1	1.708	9.04673	0.000566683	0.010811
ENSBTAG00000025233	CACN subunit beta associated regulatory protein [Source:VGNC Symbol;Acc:VGNC:26806]	CBARP	1.84735	3.81483	0.000583657	0.0111113
ENSBTAG00000009836	chromogranin A [Source:VGNC Symbol;Acc:VGNC:27289]	CHGA	3.29027	0.534098	0.000592598	0.0112492
ENSBTAG00000013031	transmembrane protein 62 [Source:VGNC Symbol;Acc:VGNC:36102]	TMEM62	1.52955	3.72168	0.000597152	0.0113155
ENSBTAG00000011818	#NA	#NA	4.07994	-0.347551	0.000616859	0.011643
ENSBTAG00000039958	glycogen synthase 1 [Source:VGNC Symbol;Acc:VGNC:29730]	GYS1	1.37825	7.23748	0.000627774	0.0118322
ENSBTAG00000011655	sterile alpha motif domain containing 10 [Source:VGNC Symbol;Acc:VGNC:34266]	SAMD10	2.29706	1.52381	0.000630554	0.0118508
ENSBTAG00000010484	LRRN4 C-terminal like [Source:VGNC Symbol;Acc:VGNC:31042]	LRRN4CL	1.5915	7.10229	0.000637634	0.0119504
ENSBTAG00000000507	nuclear receptor subfamily 4 group A member 1 [Source:VGNC Symbol;Acc:VGNC:32245]	NR4A1	2.03298	6.18388	0.000637657	0.0119504
ENSBTAG00000012991	prune homolog 2 with BCH domain [Source:VGNC Symbol;Acc:VGNC:33429]	PRUNE2	1.90463	3.73052	0.000657161	0.0122129
ENSBTAG00000010888	V-set immunoregulatory receptor [Source:VGNC Symbol;Acc:VGNC:50150]	VSIR	2.28035	4.07078	0.000664123	0.0123244
ENSBTAG00000052819	#NA	#NA	2.79351	-0.858017	0.000669721	0.012387
ENSBTAG00000049198	#NA	#NA	2.89725	-0.671822	0.000670303	0.012387
ENSBTAG00000026319	aspartate beta-hydroxylase domain containing 1 [Source:VGNC Symbol;Acc:VGNC:26220]	ASPHD1	3.76886	-0.695666	0.000669116	0.012387
ENSBTAG00000052510	C-C motif chemokine ligand 26 [Source:NCBI gene (formerly Entrezgene);Acc:508387]	CCL26	4.11517	0.440373	0.000671234	0.012387
ENSBTAG00000039319	cytochrome P450, family 4, subfamily F, polypeptide 2 [Source:NCBI gene (formerly Entrezgene);Acc:507615]	CYP4F2	2.12294	3.14128	0.000673696	0.0124151
ENSBTAG00000053667	#NA	#NA	4.4873	-0.103315	0.000676357	0.0124296
ENSBTAG00000000742	angiomotin like 2 [Source:VGNC Symbol;Acc:VGNC:25872]	AMOTL2	1.40401	8.18505	0.000681932	0.0125147
ENSBTAG00000010658	phosphofructokinase, liver type [Source:VGNC Symbol;Acc:VGNC:32773]	PFKL	1.76509	8.70509	0.000710521	0.0129683
ENSBTAG00000020457	transforming growth factor beta 1 [Source:VGNC Symbol;Acc:VGNC:35800]	TGFB1	1.40799	6.80364	0.000730371	0.0132567
ENSBTAG00000011437	salt inducible kinase 1 [Source:NCBI gene (formerly Entrezgene);Acc:100337254]	0	1.91606	7.8226	0.000733395	0.0132934
ENSBTAG00000006064	break repair meiotic recombinase recruitment factor 1 [Source:VGNC Symbol;Acc:VGNC:52729]	BRME1	2.05505	1.94024	0.000743233	0.0133802
ENSBTAG00000019303	MAF bZIP transcription factor K [Source:VGNC Symbol;Acc:VGNC:31142]	MAFK	1.62331	4.57878	0.000748032	0.0134261
ENSBTAG00000012456	HEPACAM family member 2 [Source:VGNC Symbol;Acc:VGNC:29811]	HEPACAM2	2.55475	-0.276621	0.00074882	0.0134261
ENSBTAG00000015347	Wnt family member 10B [Source:VGNC Symbol;Acc:VGNC:56232]	WNT10B	1.76546	3.04878	0.000751494	0.0134558
ENSBTAG00000010135	plasmanylethanolamine desaturase 1 [Source:VGNC Symbol;Acc:VGNC:57030]	PEDS1	1.33385	7.31885	0.000764184	0.0136646
ENSBTAG00000034985	pleckstrin homology like domain family A member 1 [Source:VGNC Symbol;Acc:VGNC:32835]	PHLDA1	2.09737	6.44404	0.000768113	0.0136977
ENSBTAG00000004208	pleckstrin homology and RhoGEF domain containing G6 [Source:VGNC Symbol;Acc:VGNC:33019]	PLEKHG6	1.75723	2.6512	0.000776856	0.0137612
ENSBTAG00000006973	#NA	#NA	2.83415	-0.633537	0.000797574	0.0140905
ENSBTAG00000018635	#NA	#NA	4.43267	-0.00408694	0.000801311	0.0141376
ENSBTAG00000013085	chymotrypsin-like elastase family, member 3B [Source:NCBI gene (formerly Entrezgene);Acc:281752]	CELA3B	2.34359	1.55381	0.000810239	0.0142383
ENSBTAG00000007897	proopiomelanocortin [Source:VGNC Symbol;Acc:VGNC:33155]	POMC	2.32382	1.75403	0.000817835	0.0143337
ENSBTAG00000049230	#NA	#NA	2.61975	-0.303766	0.000832252	0.0145288
ENSBTAG00000009867	#NA	#NA	5.25201	-0.374275	0.000831727	0.0145288
ENSBTAG00000053455	#NA	#NA	2.52688	-0.397666	0.000918442	0.0158662
ENSBTAG00000023198	serpin family B member 2 [Source:NCBI gene (formerly Entrezgene);Acc:505184]	SERPINB2	2.90215	0.692602	0.000923578	0.0159341
ENSBTAG00000005976	hydroxysteroid 17-beta dehydrogenase 7 [Source:VGNC Symbol;Acc:VGNC:29976]	HSD17B7	1.61626	5.44852	0.000927545	0.0159818
ENSBTAG00000005300	transmembrane protein 51 [Source:VGNC Symbol;Acc:VGNC:36094]	TMEM51	1.4648	5.66529	0.000943641	0.0162169
ENSBTAG00000002205	#NA	#NA	2.81359	-0.72101	0.000951001	0.0163222
ENSBTAG00000053804	#NA	#NA	2.51541	0.481117	0.000957197	0.0164073
ENSBTAG00000000483	hyaluronidase 1 [Source:NCBI gene (formerly Entrezgene);Acc:515397]	HYAL1	1.93053	5.00876	0.000974081	0.0166255
ENSBTAG00000010652	#NA	#NA	3.477	-0.549668	0.000972796	0.0166255
ENSBTAG00000004989	interferon regulatory factor 5 [Source:VGNC Symbol;Acc:VGNC:30276]	IRF5	1.71838	4.40651	0.000985511	0.0167625
ENSBTAG00000003305	#NA	#NA	4.65632	0.421174	0.000998105	0.016941
ENSBTAG00000001228	cell cycle exit and neuronal differentiation 1 [Source:VGNC Symbol;Acc:VGNC:27173]	CEND1	2.19835	1.10256	0.00102252	0.017264
ENSBTAG00000053295	#NA	#NA	2.40645	0.249949	0.0010213	0.017264
ENSBTAG00000020054	TNF receptor superfamily member 21 [Source:VGNC Symbol;Acc:VGNC:36166]	TNFRSF21	1.50845	9.13381	0.00103608	0.0174213
ENSBTAG00000008250	sprouty RTK signaling antagonist 4 [Source:VGNC Symbol;Acc:VGNC:35244]	SPRY4	2.04616	3.0188	0.00104348	0.0175235
ENSBTAG00000007916	forkhead box J1 [Source:VGNC Symbol;Acc:VGNC:29089]	FOXJ1	3.0785	0.187298	0.00107626	0.0180056
ENSBTAG00000048257	leukotriene-B(4) omega-hydroxylase 2-like [Source:NCBI gene (formerly Entrezgene);Acc:534967]	0	2.49206	3.42656	0.00109431	0.0182615
ENSBTAG00000008551	#NA	#NA	3.23823	0.0778801	0.00110176	0.0183627
ENSBTAG00000047827	renin binding protein [Source:VGNC Symbol;Acc:VGNC:33866]	RENBP	2.16391	2.37308	0.00110468	0.0183882
ENSBTAG00000017679	p21 (RAC1) activated kinase 5 [Source:NCBI gene (formerly Entrezgene);Acc:513432]	PAK5	3.41272	-0.573901	0.00110694	0.0184027
ENSBTAG00000018453	ankyrin repeat domain 37 [Source:VGNC Symbol;Acc:VGNC:25928]	ANKRD37	1.80913	1.91471	0.00116341	0.019269
ENSBTAG00000009281	SPRY domain containing 4 [Source:VGNC Symbol;Acc:VGNC:35246]	SPRYD4	1.43259	4.24908	0.00119677	0.0197228
ENSBTAG00000008683	lactate dehydrogenase A [Source:NCBI gene (formerly Entrezgene);Acc:281274]	LDHA	1.49953	7.90873	0.00122579	0.0200516
ENSBTAG00000011590	GLI pathogenesis related 1 [Source:VGNC Symbol;Acc:VGNC:29402]	GLIPR1	2.10045	1.66118	0.00127676	0.0207827
ENSBTAG00000021706	T-box transcription factor 3 [Source:VGNC Symbol;Acc:VGNC:53924]	TBX3	1.44059	5.27594	0.00132669	0.0214551
ENSBTAG00000046231	#NA	#NA	2.74148	-0.689891	0.00134315	0.0216506
ENSBTAG00000013557	endoplasmic reticulum aminopeptidase 1 [Source:VGNC Symbol;Acc:VGNC:28560]	ERAP1	1.57849	5.00881	0.00136742	0.0219883
ENSBTAG00000053561	megakaryocyte and platelet inhibitory receptor G6b [Source:NCBI gene (formerly Entrezgene);Acc:617577]	0	1.77913	2.06437	0.00140733	0.0225752
ENSBTAG00000000916	#NA	#NA	2.71295	-0.00814321	0.00141679	0.0226721
ENSBTAG00000050334	CD83 molecule [Source:NCBI gene (formerly Entrezgene);Acc:617034]	CD83	1.95707	0.602916	0.00144551	0.0231038
ENSBTAG00000050082	#NA	#NA	1.91936	1.81675	0.00146293	0.0233259
ENSBTAG00000014491	ATPase H+ transporting V1 subunit G2 [Source:VGNC Symbol;Acc:VGNC:57164]	ATP6V1G2	1.9531	0.70339	0.00146559	0.0233402
ENSBTAG00000051579	#NA	#NA	2.63174	-0.674728	0.0014795	0.0235334
ENSBTAG00000015979	#NA	#NA	4.71576	-0.259779	0.00148407	0.0235779
ENSBTAG00000019947	#NA	#NA	2.42407	-1.06764	0.00151838	0.0240078
ENSBTAG00000003300	milk fat globule EGF and factor V/VIII domain containing [Source:VGNC Symbol;Acc:VGNC:31426]	MFGE8	1.59092	8.56448	0.00153143	0.0241621
ENSBTAG00000010413	transmembrane protein 169 [Source:VGNC Symbol;Acc:VGNC:35994]	TMEM169	2.11278	1.84305	0.00155146	0.0244433
ENSBTAG00000004633	#NA	#NA	2.64511	-0.0383216	0.00156313	0.024598
ENSBTAG00000003449	#NA	#NA	2.64892	-0.949614	0.00156944	0.0246387
ENSBTAG00000048365	Wnt family member 7B [Source:NCBI gene (formerly Entrezgene);Acc:100337066]	WNT7B	1.698	4.63269	0.00158819	0.0248741
ENSBTAG00000022622	cytokine inducible SH2 containing protein [Source:VGNC Symbol;Acc:VGNC:27374]	CISH	2.35911	0.65512	0.00161816	0.0253137
ENSBTAG00000021735	polypeptide N-acetylgalactosaminyltransferase 14 [Source:VGNC Symbol;Acc:VGNC:29227]	GALNT14	4.29218	-0.957272	0.00162929	0.0254577
ENSBTAG00000005978	#NA	#NA	3.13967	-0.338281	0.00163279	0.0254823
ENSBTAG00000006125	polo like kinase 3 [Source:VGNC Symbol;Acc:VGNC:33035]	PLK3	1.46188	4.95219	0.00166529	0.0259284
ENSBTAG00000049289	#NA	#NA	4.41741	-0.164131	0.00167898	0.0261109
ENSBTAG00000051722	#NA	#NA	3.87223	0.459867	0.00169281	0.0262644
ENSBTAG00000013792	UBA like domain containing 2 [Source:VGNC Symbol;Acc:VGNC:36570]	UBALD2	1.50798	5.8974	0.00170448	0.0264145
ENSBTAG00000052734	poly(A) polymerase beta [Source:NCBI gene (formerly Entrezgene);Acc:100140898]	PAPOLB	1.47654	2.9124	0.00171756	0.026555
ENSBTAG00000012405	platelet endothelial aggregation receptor 1 [Source:VGNC Symbol;Acc:VGNC:32734]	PEAR1	1.4997	5.45997	0.00172002	0.0265621
ENSBTAG00000007659	coronin 2A [Source:VGNC Symbol;Acc:VGNC:27623]	CORO2A	1.38189	6.62581	0.00172602	0.0266193
ENSBTAG00000015293	neurexophilin 3 [Source:VGNC Symbol;Acc:VGNC:32382]	NXPH3	1.72576	4.18828	0.00177238	0.0272437
ENSBTAG00000023464	#NA	#NA	2.43284	1.54677	0.0017901	0.0274523
ENSBTAG00000008021	#NA	#NA	1.81497	0.137065	0.00179524	0.0274895
ENSBTAG00000017285	fibroblast growth factor 19 [Source:VGNC Symbol;Acc:VGNC:28975]	FGF19	1.92451	1.2113	0.00180533	0.0275772
ENSBTAG00000014191	quiescin sulfhydryl oxidase 1 [Source:VGNC Symbol;Acc:VGNC:33605]	QSOX1	1.56408	9.4978	0.00184167	0.0279841
ENSBTAG00000051503	EF-hand calcium binding domain 8 [Source:NCBI gene (formerly Entrezgene);Acc:107133056]	EFCAB8	2.48533	0.0459242	0.00184158	0.0279841
ENSBTAG00000051941	#NA	#NA	2.40866	-1.14572	0.00185601	0.0281691
ENSBTAG00000015164	solute carrier family 27 member 5 [Source:VGNC Symbol;Acc:VGNC:34789]	SLC27A5	2.03008	0.256191	0.00186587	0.0282546
ENSBTAG00000038549	phylloquinone omega-hydroxylase CYP4F2 [Source:NCBI gene (formerly Entrezgene);Acc:509506]	0	3.1502	2.29605	0.00189729	0.0286323
ENSBTAG00000011343	#NA	#NA	2.58841	-0.113628	0.00192631	0.0289712
ENSBTAG00000013141	actin related protein T3 [Source:VGNC Symbol;Acc:VGNC:25591]	ACTRT3	1.5257	2.36848	0.00196464	0.0294807
ENSBTAG00000027246	#NA	#NA	2.42921	-0.825332	0.00197835	0.0296193
ENSBTAG00000000970	#NA	#NA	2.52256	-0.179058	0.0019973	0.0298357
ENSBTAG00000014737	vascular endothelial growth factor C [Source:VGNC Symbol;Acc:VGNC:36785]	VEGFC	1.60924	5.27808	0.0020038	0.0298991
ENSBTAG00000021527	insulin like growth factor 1 receptor [Source:VGNC Symbol;Acc:VGNC:30077]	IGF1R	1.37251	7.68397	0.00206877	0.0306957
ENSBTAG00000010677	LIM and calponin homology domains 1 [Source:VGNC Symbol;Acc:VGNC:30887]	LIMCH1	1.59425	6.88364	0.00212724	0.0313177
ENSBTAG00000048049	#NA	#NA	2.20588	-0.296243	0.00216403	0.0317887
ENSBTAG00000017771	epsin 2 [Source:VGNC Symbol;Acc:VGNC:28547]	EPN2	1.4495	6.51499	0.00218545	0.0320678
ENSBTAG00000014705	hes family bHLH transcription factor 4 [Source:VGNC Symbol;Acc:VGNC:29821]	HES4	3.40178	-0.312365	0.00221702	0.0324951
ENSBTAG00000054422	#NA	#NA	2.86809	-0.384907	0.00223313	0.0326589
ENSBTAG00000052395	transmembrane protein 95 [Source:NCBI gene (formerly Entrezgene);Acc:614631]	TMEM95	2.47036	2.11417	0.00224027	0.0327272
ENSBTAG00000021846	cadherin EGF LAG seven-pass G-type receptor 3 [Source:VGNC Symbol;Acc:VGNC:27171]	CELSR3	1.88286	2.91208	0.00226741	0.0330872
ENSBTAG00000019855	mitogen-activated protein kinase kinase kinase 15 [Source:VGNC Symbol;Acc:VGNC:31193]	MAP3K15	1.49288	3.28554	0.00228602	0.0333221
ENSBTAG00000050776	#NA	#NA	2.38569	0.176658	0.0022972	0.0333748
ENSBTAG00000016936	MISP family member 3 [Source:VGNC Symbol;Acc:VGNC:55217]	MISP3	1.39432	4.20191	0.00230202	0.0334083
ENSBTAG00000000711	N-myc downstream regulated 1 [Source:VGNC Symbol;Acc:VGNC:53868]	NDRG1	1.43818	8.92717	0.00234816	0.0340033
ENSBTAG00000046989	mannosidase endo-alpha like [Source:VGNC Symbol;Acc:VGNC:31170]	MANEAL	2.52967	-0.0433366	0.00235892	0.034122
ENSBTAG00000009354	ecotropic viral integration site 2A [Source:NCBI gene (formerly Entrezgene);Acc:528920]	EVI2A	3.14377	-0.689108	0.00236162	0.0341238
ENSBTAG00000052204	#NA	#NA	1.46507	4.21849	0.00236775	0.0341751
ENSBTAG00000015369	MLLT11 transcription factor 7 cofactor [Source:VGNC Symbol;Acc:VGNC:31502]	MLLT11	1.53576	4.65862	0.00237445	0.0341973
ENSBTAG00000019910	syndecan binding protein [Source:VGNC Symbol;Acc:VGNC:34382]	SDCBP	1.30259	7.48346	0.00238596	0.0342885
ENSBTAG00000014269	scavenger receptor class B member 1 [Source:VGNC Symbol;Acc:VGNC:34324]	SCARB1	1.44777	7.52122	0.00238402	0.0342885
ENSBTAG00000049632	#NA	#NA	2.39065	-0.541047	0.00240838	0.0344611
ENSBTAG00000043979	H1.9 linker histone [Source:VGNC Symbol;Acc:VGNC:95388]	H1-9	2.01179	0.324275	0.00241761	0.0345196
ENSBTAG00000000095	CD274 molecule [Source:VGNC Symbol;Acc:VGNC:27019]	CD274	2.52809	0.935129	0.00244049	0.0348079
ENSBTAG00000016302	solute carrier family 25 member 27 [Source:VGNC Symbol;Acc:VGNC:34753]	SLC25A27	1.51133	2.91695	0.00247213	0.0352212
ENSBTAG00000018059	CD80 molecule [Source:VGNC Symbol;Acc:VGNC:27048]	CD80	3.02953	-0.698582	0.00249627	0.0355269
ENSBTAG00000014391	crumbs cell polarity complex component 2 [Source:VGNC Symbol;Acc:VGNC:27689]	CRB2	2.01786	7.42549	0.00255984	0.0363146
ENSBTAG00000009174	hydroxysteroid 17-beta dehydrogenase 14 [Source:VGNC Symbol;Acc:VGNC:29972]	HSD17B14	1.91283	0.731031	0.00262522	0.0371189
ENSBTAG00000005069	transmembrane 7 superfamily member 2 [Source:VGNC Symbol;Acc:VGNC:35910]	TM7SF2	1.91725	5.79754	0.00262774	0.0371189
ENSBTAG00000017864	#NA	#NA	3.73385	-1.15409	0.00266547	0.0375319
ENSBTAG00000009331	C3 and PZP like alpha-2-macroglobulin domain containing 8 [Source:VGNC Symbol;Acc:VGNC:27644]	CPAMD8	3.13004	-0.451942	0.00277269	0.0387943
ENSBTAG00000021609	adhesion G protein-coupled receptor F1 [Source:VGNC Symbol;Acc:VGNC:25661]	ADGRF1	2.19985	-0.176512	0.00279418	0.0389715
ENSBTAG00000054832	#NA	#NA	2.43714	-0.313788	0.00284404	0.039542
ENSBTAG00000014400	E2F transcription factor 2 [Source:VGNC Symbol;Acc:VGNC:54420]	E2F2	1.42702	5.41608	0.00285003	0.0395768
ENSBTAG00000009231	NAD(P) dependent steroid dehydrogenase-like [Source:VGNC Symbol;Acc:VGNC:56932]	NSDHL	1.6554	7.02094	0.00285543	0.0395768
ENSBTAG00000001764	neurocan [Source:VGNC Symbol;Acc:VGNC:31900]	NCAN	2.293	2.26812	0.0028555	0.0395768
ENSBTAG00000020737	SRY-box transcription factor 8 [Source:VGNC Symbol;Acc:VGNC:35151]	SOX8	1.69533	2.02143	0.00286051	0.0396047
ENSBTAG00000004951	#NA	#NA	2.33577	-0.829265	0.00298573	0.040911
ENSBTAG00000016765	chromosome 25 C7orf61 homolog [Source:NCBI gene (formerly Entrezgene);Acc:617958]	C7orf61	1.79428	0.778114	0.00300716	0.041162
ENSBTAG00000008185	reticulon 2 [Source:VGNC Symbol;Acc:VGNC:34204]	RTN2	1.3917	5.01727	0.00301836	0.0412301
ENSBTAG00000050174	#NA	#NA	2.70445	-0.774756	0.00302988	0.041345
ENSBTAG00000048740	#NA	#NA	1.86494	-0.0495102	0.00308146	0.0420055
ENSBTAG00000008401	6-phosphofructo-2-kinase/fructose-2,6-biphosphatase 3 [Source:VGNC Symbol;Acc:VGNC:32771]	PFKFB3	1.49908	6.23738	0.00312349	0.0424474
ENSBTAG00000006907	#NA	#NA	3.37564	-0.898039	0.00312068	0.0424474
ENSBTAG00000044726	7SK RNA [Source:RFAM;Acc:RF00100]	7SK	1.88988	0.87018	0.00313431	0.0425508
ENSBTAG00000000088	activated leukocyte cell adhesion molecule [Source:VGNC Symbol;Acc:VGNC:25805]	ALCAM	1.54518	7.05272	0.00315954	0.0428068
ENSBTAG00000013705	NFKB inhibitor epsilon [Source:VGNC Symbol;Acc:VGNC:32048]	NFKBIE	1.6368	5.44741	0.00315962	0.0428068
ENSBTAG00000001795	lon peptidase 1, mitochondrial [Source:VGNC Symbol;Acc:VGNC:30947]	LONP1	1.23397	7.8474	0.00316957	0.0428976
ENSBTAG00000005972	#NA	#NA	1.95749	0.213982	0.00321437	0.043283
ENSBTAG00000034519	uncharacterized LOC100126544 [Source:NCBI gene (formerly Entrezgene);Acc:100126544]	0	1.69795	3.94742	0.00330352	0.0443033
ENSBTAG00000004272	TLH29 protein precursor-like [Source:NCBI gene (formerly Entrezgene);Acc:617420]	ISG12(B)	2.12706	0.054715	0.00332476	0.0444425
ENSBTAG00000017602	transmembrane protein 45B [Source:VGNC Symbol;Acc:VGNC:36089]	TMEM45B	2.42977	1.4638	0.0033449	0.0446323
ENSBTAG00000001152	TLE family member 6, subcortical maternal complex member [Source:VGNC Symbol;Acc:VGNC:52895]	TLE6	1.71757	3.37592	0.00338482	0.0449125
ENSBTAG00000049855	#NA	#NA	2.72093	-0.640193	0.00338623	0.0449125
ENSBTAG00000051950	#NA	#NA	2.2136	-0.809853	0.0033923	0.0449479
ENSBTAG00000008779	arachidonate 15-lipoxygenase type B [Source:VGNC Symbol;Acc:VGNC:55769]	ALOX15B	2.99494	2.34749	0.00343924	0.0454336
ENSBTAG00000002505	G protein-coupled receptor 3 [Source:VGNC Symbol;Acc:VGNC:29581]	GPR3	2.32176	0.35601	0.00348661	0.0460136
ENSBTAG00000054953	#NA	#NA	1.62128	2.28207	0.00349607	0.0460585
ENSBTAG00000010279	dual specificity phosphatase 14 [Source:VGNC Symbol;Acc:VGNC:28252]	DUSP14	1.3519	5.76133	0.00350168	0.0460748
ENSBTAG00000014546	#NA	#NA	3.1573	-1.03165	0.00352504	0.046336
ENSBTAG00000007503	stereocilin [Source:VGNC Symbol;Acc:VGNC:55895]	STRC	3.67942	0.511459	0.00353159	0.0463762
ENSBTAG00000050742	#NA	#NA	1.65553	1.50228	0.00354603	0.0465196
ENSBTAG00000022294	fatty acid desaturase 1 [Source:VGNC Symbol;Acc:VGNC:28701]	FADS1	1.3936	7.79533	0.00364222	0.0475932
ENSBTAG00000037799	#NA	#NA	2.73021	-0.795905	0.00368256	0.0479312
ENSBTAG00000002827	acetyl-CoA acetyltransferase 2 [Source:VGNC Symbol;Acc:VGNC:25530]	ACAT2	1.67099	8.21972	0.00372018	0.0483733
ENSBTAG00000044304	#NA	#NA	1.99792	-0.563119	0.00379628	0.0492179
ENSBTAG00000046333	chromosome 6 C4orf54 homolog [Source:VGNC Symbol;Acc:VGNC:58594]	C6H4orf54	1.95142	1.55353	0.00383804	0.0496136
ENSBTAG00000010954	ADP-ribosyltransferase 3 (inactive) [Source:VGNC Symbol;Acc:VGNC:26180]	ART3	-3.65125	3.29467	4.27148e-09	4.31653e-06
ENSBTAG00000003880	elastin microfibril interfacer 2 [Source:VGNC Symbol;Acc:VGNC:28474]	EMILIN2	-3.33103	4.70572	6.22163e-09	5.49577e-06
ENSBTAG00000013760	collagen type IV alpha 6 chain [Source:VGNC Symbol;Acc:VGNC:27567]	COL4A6	-3.29965	6.18454	1.84851e-08	1.16632e-05
ENSBTAG00000034147	olfactomedin like 2B [Source:VGNC Symbol;Acc:VGNC:32423]	OLFML2B	-3.2205	5.2058	2.80614e-08	1.43005e-05
ENSBTAG00000009012	pentraxin 3 [Source:VGNC Symbol;Acc:VGNC:33566]	PTX3	-5.42471	3.90993	3.91091e-08	1.72732e-05
ENSBTAG00000015780	reticulocalbin 2 [Source:VGNC Symbol;Acc:VGNC:33832]	RCN2	-2.98278	4.75911	3.8836e-08	1.72732e-05
ENSBTAG00000010726	coagulation factor VIII [Source:VGNC Symbol;Acc:VGNC:28690]	F8	-3.71807	2.63721	6.32621e-08	2.3284e-05
ENSBTAG00000044033	EGF like repeats and discoidin domains 3 [Source:VGNC Symbol;Acc:VGNC:28326]	EDIL3	-4.39643	3.89204	7.71654e-08	2.64597e-05
ENSBTAG00000013369	collagen type XIV alpha 1 chain [Source:VGNC Symbol;Acc:VGNC:53851]	COL14A1	-2.71891	7.27683	7.78813e-08	2.64597e-05
ENSBTAG00000016221	angiomotin [Source:VGNC Symbol;Acc:VGNC:25870]	AMOT	-2.47403	5.75727	8.46894e-08	2.7404e-05
ENSBTAG00000009430	myosin VIIA and Rab interacting protein [Source:VGNC Symbol;Acc:VGNC:31846]	MYRIP	-5.39499	2.53419	8.80103e-08	2.77651e-05
ENSBTAG00000017369	MAM domain containing 2 [Source:VGNC Symbol;Acc:VGNC:31157]	MAMDC2	-3.19898	5.29556	1.04583e-07	3.19022e-05
ENSBTAG00000021969	kelch like family member 29 [Source:VGNC Symbol;Acc:VGNC:30656]	KLHL29	-2.4884	4.12052	1.12704e-07	3.21794e-05
ENSBTAG00000009747	ring finger protein, transmembrane 1 [Source:VGNC Symbol;Acc:VGNC:34074]	RNFT1	-2.27855	5.28717	1.16844e-07	3.21794e-05
ENSBTAG00000003165	ADAM metallopeptidase with thrombospondin type 1 motif 9 [Source:VGNC Symbol;Acc:VGNC:25630]	ADAMTS9	-4.1582	6.38172	1.30882e-07	3.46837e-05
ENSBTAG00000017183	PDZ and LIM domain 3 [Source:VGNC Symbol;Acc:VGNC:32709]	PDLIM3	-3.79335	1.72842	1.48306e-07	3.58253e-05
ENSBTAG00000048991	REC114 meiotic recombination protein [Source:NCBI gene (formerly Entrezgene);Acc:613762]	REC114	-3.72279	2.62322	1.44005e-07	3.58253e-05
ENSBTAG00000004269	serum/glucocorticoid regulated kinase 1 [Source:VGNC Symbol;Acc:VGNC:34541]	SGK1	-2.01756	5.7094	1.40707e-07	3.58253e-05
ENSBTAG00000013848	adhesion G protein-coupled receptor D1 [Source:VGNC Symbol;Acc:VGNC:53887]	ADGRD1	-2.33532	7.45749	1.61643e-07	3.63011e-05
ENSBTAG00000032515	phospholipase A2 receptor 1 [Source:VGNC Symbol;Acc:VGNC:32966]	PLA2R1	-3.33478	3.23085	1.80358e-07	3.85443e-05
ENSBTAG00000016514	carboxypeptidase E [Source:VGNC Symbol;Acc:VGNC:27648]	CPE	-3.56784	7.44017	2.30894e-07	4.64297e-05
ENSBTAG00000002979	phosphoinositide-3-kinase regulatory subunit 3 [Source:NCBI gene (formerly Entrezgene);Acc:286865]	PIK3R3	-3.42192	2.42056	2.31272e-07	4.64297e-05
ENSBTAG00000037649	vasoactive intestinal peptide receptor 2 [Source:VGNC Symbol;Acc:VGNC:36800]	VIPR2	-4.88568	3.3648	2.46202e-07	4.75479e-05
ENSBTAG00000005800	glutamate ionotropic receptor AMPA type subunit 1 [Source:VGNC Symbol;Acc:VGNC:29638]	GRIA1	-4.04228	3.57114	2.46825e-07	4.75479e-05
ENSBTAG00000031214	interferon regulatory factor 4 [Source:NCBI gene (formerly Entrezgene);Acc:618409]	0	-2.93402	1.34015	2.60849e-07	4.75479e-05
ENSBTAG00000020485	arrestin beta 1 [Source:VGNC Symbol;Acc:VGNC:26169]	ARRB1	-2.91942	3.97291	2.66976e-07	4.75479e-05
ENSBTAG00000014575	collagen type IV alpha 5 chain [Source:VGNC Symbol;Acc:VGNC:50084]	COL4A5	-2.42248	7.97457	2.60191e-07	4.75479e-05
ENSBTAG00000031575	vav guanine nucleotide exchange factor 3 [Source:VGNC Symbol;Acc:VGNC:36774]	VAV3	-3.57926	3.33117	2.90077e-07	4.75986e-05
ENSBTAG00000012514	podocan [Source:VGNC Symbol;Acc:VGNC:33101]	PODN	-2.92444	1.82237	2.84966e-07	4.75986e-05
ENSBTAG00000016847	ADP ribosylation factor like GTPase 4D [Source:VGNC Symbol;Acc:VGNC:26146]	ARL4D	-2.68402	5.47636	2.84029e-07	4.75986e-05
ENSBTAG00000020060	thioredoxin interacting protein [Source:VGNC Symbol;Acc:VGNC:36541]	TXNIP	-2.4929	7.50681	2.84275e-07	4.75986e-05
ENSBTAG00000002982	PITPNM family member 3 [Source:VGNC Symbol;Acc:VGNC:52807]	PITPNM3	-3.0246	2.82885	3.05311e-07	4.93337e-05
ENSBTAG00000003709	integrin subunit beta 8 [Source:VGNC Symbol;Acc:VGNC:30333]	ITGB8	-2.49236	3.52653	3.24749e-07	5.12253e-05
ENSBTAG00000001405	glucuronic acid epimerase [Source:VGNC Symbol;Acc:VGNC:29394]	GLCE	-1.96838	7.00678	3.29097e-07	5.13004e-05
ENSBTAG00000004562	CD207 molecule [Source:VGNC Symbol;Acc:VGNC:27011]	CD207	-3.39828	2.70755	3.44233e-07	5.24263e-05
ENSBTAG00000022255	androgen receptor [Source:VGNC Symbol;Acc:VGNC:26053]	AR	-2.54032	2.14333	3.70668e-07	5.58108e-05
ENSBTAG00000008635	sulfotransferase family, cytosolic, 1A, phenol-preferring, member 1 [Source:NCBI gene (formerly Entrezgene);Acc:282485]	SULT1A1	-2.50053	8.37369	3.77842e-07	5.62518e-05
ENSBTAG00000014543	plexin A4 [Source:VGNC Symbol;Acc:VGNC:33060]	PLXNA4	-3.93185	2.42922	3.8505e-07	5.66541e-05
ENSBTAG00000010464	MN1 proto-oncogene, transcriptional regulator [Source:VGNC Symbol;Acc:VGNC:31536]	MN1	-2.8337	3.66149	4.0857e-07	5.69848e-05
ENSBTAG00000050852	C-X-C motif chemokine ligand 9 [Source:NCBI gene (formerly Entrezgene);Acc:513990]	CXCL9	-4.57427	5.11543	4.55825e-07	6.17542e-05
ENSBTAG00000021835	prickle planar cell polarity protein 2 [Source:VGNC Symbol;Acc:VGNC:33316]	PRICKLE2	-3.7034	2.64232	4.51737e-07	6.17542e-05
ENSBTAG00000007450	complement C2 [Source:VGNC Symbol;Acc:VGNC:53959]	C2	-2.40905	5.07585	4.56748e-07	6.17542e-05
ENSBTAG00000008103	aldehyde dehydrogenase 1 family member A1 [Source:VGNC Symbol;Acc:VGNC:25808]	ALDH1A1	-3.61193	1.1928	4.73255e-07	6.27063e-05
ENSBTAG00000032481	death associated protein like 1 [Source:VGNC Symbol;Acc:VGNC:27879]	DAPL1	-3.26148	2.14719	4.70362e-07	6.27063e-05
ENSBTAG00000000828	calpain 6 [Source:VGNC Symbol;Acc:VGNC:26749]	CAPN6	-4.29033	1.77209	5.31218e-07	6.93264e-05
ENSBTAG00000002940	Wnt family member 16 [Source:VGNC Symbol;Acc:VGNC:36956]	WNT16	-5.06383	4.35343	5.43066e-07	6.98604e-05
ENSBTAG00000049946	#NA	#NA	-3.46946	0.608742	5.73273e-07	7.1713e-05
ENSBTAG00000011451	reticulon 1 [Source:VGNC Symbol;Acc:VGNC:34203]	RTN1	-2.7138	4.17905	5.73704e-07	7.1713e-05
ENSBTAG00000004178	acyl-CoA oxidase 2 [Source:VGNC Symbol;Acc:VGNC:25553]	ACOX2	-2.12455	5.75488	5.65904e-07	7.1713e-05
ENSBTAG00000052132	forkhead box Q1 [Source:NCBI gene (formerly Entrezgene);Acc:112443729]	FOXQ1	-4.21134	1.09189	5.92707e-07	7.33959e-05
ENSBTAG00000047330	fatty acid binding protein 5 [Source:NCBI gene (formerly Entrezgene);Acc:281760]	FABP5	-4.33281	4.76394	6.06566e-07	7.39297e-05
ENSBTAG00000004280	sushi repeat containing protein X-linked [Source:VGNC Symbol;Acc:VGNC:50570]	SRPX	-2.51495	3.14927	6.35607e-07	7.61596e-05
ENSBTAG00000040543	transmembrane protein 200A [Source:VGNC Symbol;Acc:VGNC:57364]	TMEM200A	-2.19321	5.60169	6.38017e-07	7.61596e-05
ENSBTAG00000010050	collagen type XVI alpha 1 chain [Source:VGNC Symbol;Acc:VGNC:27557]	COL16A1	-2.81489	6.29822	6.47355e-07	7.65844e-05
ENSBTAG00000022150	matrix remodeling associated 5 [Source:VGNC Symbol;Acc:VGNC:31774]	MXRA5	-3.64013	7.50701	7.09027e-07	8.16922e-05
ENSBTAG00000000781	huntingtin interacting protein 1 [Source:VGNC Symbol;Acc:VGNC:29857]	HIP1	-1.80424	5.46047	8.05223e-07	8.92909e-05
ENSBTAG00000006619	megakaryocyte-associated tyrosine kinase [Source:VGNC Symbol;Acc:VGNC:31263]	MATK	-3.15813	1.29524	8.84825e-07	9.60978e-05
ENSBTAG00000017549	KIT ligand [Source:VGNC Symbol;Acc:VGNC:30619]	KITLG	-2.14681	5.56359	9.40396e-07	0.000100486
ENSBTAG00000005668	solute carrier family 39 member 8 [Source:VGNC Symbol;Acc:VGNC:34868]	SLC39A8	-3.69703	2.70399	9.58185e-07	0.000100761
ENSBTAG00000010841	flavin containing dimethylaniline monoxygenase 5 [Source:VGNC Symbol;Acc:VGNC:29053]	FMO5	-2.35975	3.0363	9.51724e-07	0.000100761
ENSBTAG00000018650	hepatic and glial cell adhesion molecule [Source:VGNC Symbol;Acc:VGNC:29810]	HEPACAM	-3.71917	2.09376	9.80353e-07	0.000101482
ENSBTAG00000015793	RAB38, member RAS oncogene family [Source:VGNC Symbol;Acc:VGNC:33646]	RAB38	-2.95857	2.84118	1.0309e-06	0.000105887
ENSBTAG00000014713	retinoic acid receptor responder 1 [Source:VGNC Symbol;Acc:VGNC:33731]	RARRES1	-3.18663	6.9829	1.07217e-06	0.000107736
ENSBTAG00000018016	nuclear protein 1, transcriptional regulator [Source:VGNC Symbol;Acc:VGNC:32369]	NUPR1	-2.83622	5.27445	1.07329e-06	0.000107736
ENSBTAG00000048655	5'-nucleotidase ecto [Source:NCBI gene (formerly Entrezgene);Acc:281363]	NT5E	-4.37597	3.23606	1.09964e-06	0.000109117
ENSBTAG00000034693	synaptotagmin 1 [Source:VGNC Symbol;Acc:VGNC:35535]	SYT1	-3.64593	5.15988	1.10352e-06	0.000109117
ENSBTAG00000013909	BOC cell adhesion associated, oncogene regulated [Source:VGNC Symbol;Acc:VGNC:26536]	BOC	-2.57871	4.80547	1.13692e-06	0.000111587
ENSBTAG00000001725	C-X-C motif chemokine ligand 10 [Source:VGNC Symbol;Acc:VGNC:27846]	CXCL10	-4.15245	4.59815	1.18261e-06	0.000114377
ENSBTAG00000016484	ATPase phospholipid transporting 11C [Source:VGNC Symbol;Acc:VGNC:26275]	ATP11C	-2.88544	1.89499	1.20286e-06	0.000115492
ENSBTAG00000006720	gap junction protein alpha 5 [Source:VGNC Symbol;Acc:VGNC:29374]	GJA5	-4.38981	4.69805	1.22006e-06	0.000116301
ENSBTAG00000034827	platelet derived growth factor D [Source:VGNC Symbol;Acc:VGNC:32691]	PDGFD	-4.5292	0.576233	1.24317e-06	0.000117657
ENSBTAG00000006439	dedicator of cytokinesis 11 [Source:VGNC Symbol;Acc:VGNC:28156]	DOCK11	-3.09754	5.27244	1.29087e-06	0.000121305
ENSBTAG00000046324	C-type lectin domain family 2 member D11 [Source:NCBI gene (formerly Entrezgene);Acc:100297676]	0	-3.89907	2.17516	1.32684e-06	0.000123807
ENSBTAG00000032687	cystatin-9-like [Source:NCBI gene (formerly Entrezgene);Acc:505033]	0	-5.5397	0.332629	1.37665e-06	0.000127556
ENSBTAG00000011275	signal peptide, CUB domain and EGF like domain containing 1 [Source:VGNC Symbol;Acc:VGNC:34371]	SCUBE1	-5.38069	0.826357	1.43095e-06	0.000129863
ENSBTAG00000012409	periostin [Source:VGNC Symbol;Acc:VGNC:33171]	POSTN	-3.09402	9.57881	1.4255e-06	0.000129863
ENSBTAG00000006519	TNF receptor superfamily member 25 [Source:VGNC Symbol;Acc:VGNC:36167]	TNFRSF25	-2.75494	2.48874	1.41169e-06	0.000129863
ENSBTAG00000011932	proteoglycan 4 [Source:VGNC Symbol;Acc:VGNC:33314]	PRG4	-4.09316	3.92092	1.49391e-06	0.000132848
ENSBTAG00000014821	solute carrier family 7 member 7 [Source:VGNC Symbol;Acc:VGNC:34932]	SLC7A7	-3.37288	3.2723	1.48527e-06	0.000132848
ENSBTAG00000027181	laminin subunit alpha 3 [Source:VGNC Symbol;Acc:VGNC:30770]	LAMA3	-2.031	5.94652	1.57818e-06	0.000138482
ENSBTAG00000019612	ribonuclease A family member 4 [Source:VGNC Symbol;Acc:VGNC:33998]	RNASE4	-3.33482	4.5253	1.61654e-06	0.000140915
ENSBTAG00000051732	#NA	#NA	-5.1262	-0.326941	1.64818e-06	0.000142567
ENSBTAG00000008717	serpin family E member 2 [Source:VGNC Symbol;Acc:VGNC:56144]	SERPINE2	-2.07842	6.56916	1.65701e-06	0.000142567
ENSBTAG00000000706	ADAM metallopeptidase with thrombospondin type 1 motif 1 [Source:VGNC Symbol;Acc:VGNC:25614]	ADAMTS1	-2.29248	5.27393	1.68022e-06	0.000143632
ENSBTAG00000020989	sushi domain containing 4 [Source:VGNC Symbol;Acc:VGNC:35489]	SUSD4	-2.27806	4.87964	1.79129e-06	0.000150289
ENSBTAG00000037526	fatty acid binding protein 4, adipocyte [Source:NCBI gene (formerly Entrezgene);Acc:281759]	FABP4	-4.36891	1.33644	1.84064e-06	0.000152428
ENSBTAG00000005603	C-X-C motif chemokine ligand 11 [Source:VGNC Symbol;Acc:VGNC:27847]	CXCL11	-5.15593	3.90485	1.92144e-06	0.000156191
ENSBTAG00000005273	interleukin 1 receptor type 1 [Source:VGNC Symbol;Acc:VGNC:30131]	IL1R1	-2.17104	7.33118	1.93607e-06	0.00015642
ENSBTAG00000006676	fin bud initiation factor homolog [Source:VGNC Symbol;Acc:VGNC:56527]	FIBIN	-2.35577	5.72728	1.96878e-06	0.000158099
ENSBTAG00000005377	sclerostin domain containing 1 [Source:VGNC Symbol;Acc:VGNC:35136]	SOSTDC1	-4.41862	2.65813	2.03734e-06	0.000161645
ENSBTAG00000003601	zinc finger matrin-type 1 [Source:VGNC Symbol;Acc:VGNC:37190]	ZMAT1	-4.44304	0.19996	2.14707e-06	0.000169337
ENSBTAG00000021743	zinc finger protein 704 [Source:VGNC Symbol;Acc:VGNC:37335]	ZNF704	-3.86943	0.752099	2.1737e-06	0.00016942
ENSBTAG00000014272	methylmalonyl-CoA mutase [Source:VGNC Symbol;Acc:VGNC:31764]	MMUT	-2.57068	4.67938	2.21265e-06	0.000171448
ENSBTAG00000017901	layilin [Source:VGNC Symbol;Acc:VGNC:30803]	LAYN	-3.34755	2.48154	2.26895e-06	0.000172779
ENSBTAG00000017745	interleukin 6 signal transducer [Source:VGNC Symbol;Acc:VGNC:30168]	IL6ST	-2.52545	9.73273	2.33163e-06	0.000176538
ENSBTAG00000016267	serpin family G member 1 [Source:VGNC Symbol;Acc:VGNC:54891]	SERPING1	-3.00194	3.77703	2.35905e-06	0.000177599
ENSBTAG00000038195	CD302 molecule [Source:VGNC Symbol;Acc:VGNC:55333]	CD302	-2.30462	4.1343	2.49826e-06	0.000183899
ENSBTAG00000003595	family with sequence similarity 216 member B [Source:VGNC Symbol;Acc:VGNC:28796]	FAM216B	-5.29703	1.11639	2.57881e-06	0.00018878
ENSBTAG00000003791	lysophosphatidic acid receptor 3 [Source:VGNC Symbol;Acc:VGNC:30957]	LPAR3	-2.8507	5.66035	2.71435e-06	0.00019645
ENSBTAG00000019289	integrin subunit alpha 2 [Source:VGNC Symbol;Acc:VGNC:30313]	ITGA2	-2.69342	5.1444	2.72806e-06	0.00019645
ENSBTAG00000033248	cadherin 3 [Source:VGNC Symbol;Acc:VGNC:27103]	CDH3	-1.99948	3.74348	2.77709e-06	0.000197508
ENSBTAG00000016260	leucine rich repeat kinase 2 [Source:VGNC Symbol;Acc:VGNC:31038]	LRRK2	-2.51879	2.23624	2.9745e-06	0.000205272
ENSBTAG00000008204	carnosine N-methyltransferase 1 [Source:VGNC Symbol;Acc:VGNC:26771]	CARNMT1	-2.1473	4.03659	2.9609e-06	0.000205272
ENSBTAG00000019615	putative homeodomain transcription factor 1 [Source:VGNC Symbol;Acc:VGNC:32848]	PHTF1	-2.02971	3.65973	2.99368e-06	0.000205525
ENSBTAG00000025942	15-hydroxyprostaglandin dehydrogenase [Source:VGNC Symbol;Acc:VGNC:56973]	HPGD	-4.4429	1.03655	3.04656e-06	0.000208077
ENSBTAG00000023177	complement factor H [Source:NCBI gene (formerly Entrezgene);Acc:280816]	CFH	-4.78148	2.63799	3.17803e-06	0.000215498
ENSBTAG00000047648	synaptotagmin 2 [Source:VGNC Symbol;Acc:VGNC:35541]	SYT2	-3.77926	-0.0539281	3.18774e-06	0.000215498
ENSBTAG00000000925	glycosyltransferase 8 domain containing 2 [Source:VGNC Symbol;Acc:VGNC:29424]	GLT8D2	-7.81689	-0.785829	3.25471e-06	0.000215625
ENSBTAG00000015562	phospholipase B domain containing 1 [Source:VGNC Symbol;Acc:VGNC:32978]	PLBD1	-4.05287	3.99089	3.22828e-06	0.000215625
ENSBTAG00000013176	SPARC related modular calcium binding 2 [Source:VGNC Symbol;Acc:VGNC:35027]	SMOC2	-2.52905	5.20349	3.22342e-06	0.000215625
ENSBTAG00000020173	inositol polyphosphate-5-phosphatase D [Source:VGNC Symbol;Acc:VGNC:30212]	INPP5D	-2.53047	2.29762	3.42522e-06	0.000224674
ENSBTAG00000020243	sushi, von Willebrand factor type A, EGF and pentraxin domain containing 1 [Source:VGNC Symbol;Acc:VGNC:56985]	SVEP1	-3.11105	1.24355	3.69487e-06	0.000237656
ENSBTAG00000001085	FAM20A golgi associated secretory pathway pseudokinase [Source:VGNC Symbol;Acc:VGNC:28785]	FAM20A	-3.26292	3.5864	3.74748e-06	0.000239875
ENSBTAG00000014665	ADAM metallopeptidase with thrombospondin type 1 motif 2 [Source:VGNC Symbol;Acc:VGNC:25624]	ADAMTS2	-2.94832	2.69786	3.77296e-06	0.000240345
ENSBTAG00000020573	signal peptide, CUB domain and EGF like domain containing 2 [Source:VGNC Symbol;Acc:VGNC:34372]	SCUBE2	-2.52292	2.45223	3.81472e-06	0.000241842
ENSBTAG00000010082	collagen type XV alpha 1 chain [Source:VGNC Symbol;Acc:VGNC:27556]	COL15A1	-2.22023	3.56706	4.01232e-06	0.000251959
ENSBTAG00000008013	leucine rich repeat containing 2 [Source:VGNC Symbol;Acc:VGNC:59173]	LRRC2	-2.62282	2.52858	4.7053e-06	0.000288636
ENSBTAG00000017223	mesoderm specific transcript [Source:VGNC Symbol;Acc:VGNC:31393]	MEST	-3.15733	4.02439	4.77101e-06	0.000288657
ENSBTAG00000001662	EH domain containing 3 [Source:VGNC Symbol;Acc:VGNC:28373]	EHD3	-2.1699	4.91664	4.75802e-06	0.000288657
ENSBTAG00000004720	sulfatase 1 [Source:VGNC Symbol;Acc:VGNC:53880]	SULF1	-2.84619	5.50449	5.23073e-06	0.000309407
ENSBTAG00000009289	membrane spanning 4-domains A8 [Source:VGNC Symbol;Acc:VGNC:31687]	MS4A8	-1.9826	3.73319	5.53936e-06	0.000326207
ENSBTAG00000008100	golgin A7 family member B [Source:VGNC Symbol;Acc:VGNC:29488]	GOLGA7B	-3.41426	0.808846	5.70365e-06	0.000332923
ENSBTAG00000018465	potassium voltage-gated channel subfamily A member regulatory beta subunit 1 [Source:VGNC Symbol;Acc:VGNC:30427]	KCNAB1	-6.30278	-0.446959	5.77669e-06	0.000335707
ENSBTAG00000031358	dihydropyrimidine dehydrogenase [Source:VGNC Symbol;Acc:VGNC:28193]	DPYD	-2.41864	1.4976	5.83963e-06	0.000337883
ENSBTAG00000012371	carboxypeptidase D [Source:VGNC Symbol;Acc:VGNC:27647]	CPD	-2.13771	8.64331	6.00028e-06	0.000344172
ENSBTAG00000018137	alpha-2-macroglobulin [Source:VGNC Symbol;Acc:VGNC:55837]	A2M	-4.83946	2.53689	6.17001e-06	0.000352382
ENSBTAG00000004281	acyl-CoA synthetase short chain family member 1 [Source:VGNC Symbol;Acc:VGNC:25570]	ACSS1	-2.9941	1.93411	6.22017e-06	0.000353722
ENSBTAG00000009851	roundabout guidance receptor 1 [Source:VGNC Symbol;Acc:VGNC:34078]	ROBO1	-2.82934	4.53027	6.62931e-06	0.000370626
ENSBTAG00000014890	cytochrome P450, family 19, subfamily A, polypeptide 1 [Source:NCBI gene (formerly Entrezgene);Acc:281740]	CYP19A1	-5.02256	-0.823217	6.8619e-06	0.000380906
ENSBTAG00000011338	neuronal regeneration related protein [Source:NCBI gene (formerly Entrezgene);Acc:100125763]	NREP	-3.95678	2.34412	6.87068e-06	0.000380906
ENSBTAG00000003837	R-spondin 1 [Source:VGNC Symbol;Acc:VGNC:34188]	RSPO1	-4.68737	1.64374	6.98618e-06	0.000384095
ENSBTAG00000014567	myosin light chain kinase [Source:NCBI gene (formerly Entrezgene);Acc:338037]	MYLK	-2.99876	0.282167	7.05222e-06	0.000386124
ENSBTAG00000054218	insulin like growth factor binding protein 5 [Source:NCBI gene (formerly Entrezgene);Acc:404185]	IGFBP5	-3.83233	2.29085	7.25336e-06	0.000395502
ENSBTAG00000011824	osteoglycin [Source:VGNC Symbol;Acc:VGNC:32414]	OGN	-4.56736	0.898931	7.49043e-06	0.000405095
ENSBTAG00000016800	semaphorin 6D [Source:VGNC Symbol;Acc:VGNC:34444]	SEMA6D	-4.64145	-0.144249	7.61062e-06	0.000409921
ENSBTAG00000002576	gliomedin [Source:VGNC Symbol;Acc:VGNC:29396]	GLDN	-3.67889	2.9376	7.76978e-06	0.000413423
ENSBTAG00000020046	CXADR like membrane protein [Source:VGNC Symbol;Acc:VGNC:50091]	CLMP	-3.4043	2.09969	7.80043e-06	0.000413423
ENSBTAG00000021444	twist family bHLH transcription factor 2 [Source:VGNC Symbol;Acc:VGNC:36526]	TWIST2	-2.11262	3.5851	7.78603e-06	0.000413423
ENSBTAG00000024000	atonal bHLH transcription factor 8 [Source:VGNC Symbol;Acc:VGNC:26272]	ATOH8	-2.25652	4.62893	7.88835e-06	0.000414629
ENSBTAG00000047461	#NA	#NA	-4.34871	-0.110092	8.02946e-06	0.00041886
ENSBTAG00000007415	solute carrier family 7 member 8 [Source:VGNC Symbol;Acc:VGNC:34933]	SLC7A8	-2.42145	3.7905	8.12198e-06	0.000422025
ENSBTAG00000010472	TNF alpha induced protein 8 like 3 [Source:VGNC Symbol;Acc:VGNC:36160]	TNFAIP8L3	-2.54712	2.08651	8.49771e-06	0.000439823
ENSBTAG00000000494	phosphodiesterase 4D [Source:VGNC Symbol;Acc:VGNC:32677]	PDE4D	-2.20823	2.39325	8.58607e-06	0.000440951
ENSBTAG00000014863	glycophorin C [Source:VGNC Symbol;Acc:VGNC:49062]	GYPC	-2.41302	3.39433	8.61985e-06	0.000440977
ENSBTAG00000014560	H2.0 like homeobox [Source:VGNC Symbol;Acc:VGNC:50277]	HLX	-2.26557	4.78723	8.68741e-06	0.000442166
ENSBTAG00000002127	t-complex 11 like 2 [Source:VGNC Symbol;Acc:VGNC:35704]	TCP11L2	-2.61357	2.18858	9.25532e-06	0.000466285
ENSBTAG00000012295	NKD inhibitor of WNT signaling pathway 1 [Source:VGNC Symbol;Acc:VGNC:32093]	NKD1	-2.82932	3.01576	9.33461e-06	0.000468499
ENSBTAG00000011640	phospholipid phosphatase 3 [Source:VGNC Symbol;Acc:VGNC:33046]	PLPP3	-3.52717	1.54801	9.69456e-06	0.000481097
ENSBTAG00000014135	WD repeat domain 17 [Source:VGNC Symbol;Acc:VGNC:36884]	WDR17	-1.9913	5.46567	9.91139e-06	0.000486392
ENSBTAG00000047502	FKBP prolyl isomerase 5 [Source:VGNC Symbol;Acc:VGNC:29024]	FKBP5	-1.74472	9.12301	1.01284e-05	0.000495208
ENSBTAG00000017527	crystallin beta-gamma domain containing 1 [Source:VGNC Symbol;Acc:VGNC:27739]	CRYBG1	-2.28447	6.72572	1.03098e-05	0.000497352
ENSBTAG00000002974	flavin containing dimethylaniline monoxygenase 2 [Source:VGNC Symbol;Acc:VGNC:29050]	FMO2	-4.86527	2.82065	1.0428e-05	0.000500618
ENSBTAG00000006256	protein tyrosine phosphatase receptor type O [Source:VGNC Symbol;Acc:VGNC:33555]	PTPRO	-2.66088	3.23635	1.06321e-05	0.000508575
ENSBTAG00000030881	transmembrane protein 260 [Source:VGNC Symbol;Acc:VGNC:36069]	TMEM260	-2.32531	4.25399	1.06917e-05	0.000509585
ENSBTAG00000011836	osteomodulin [Source:VGNC Symbol;Acc:VGNC:32429]	OMD	-2.9337	2.85988	1.07467e-05	0.000510372
ENSBTAG00000002138	peptidyl arginine deiminase 1 [Source:VGNC Symbol;Acc:VGNC:32545]	PADI1	-4.27004	1.53754	1.16233e-05	0.000538492
ENSBTAG00000011644	thrombospondin type 1 domain containing 4 [Source:NCBI gene (formerly Entrezgene);Acc:540939]	THSD4	-2.06947	2.8027	1.23459e-05	0.000567998
ENSBTAG00000016277	mitochondrial amidoxime reducing component 2 [Source:VGNC Symbol;Acc:VGNC:97289]	MTARC2	-1.77069	3.73171	1.24202e-05	0.000568344
ENSBTAG00000019175	sine oculis binding protein homolog [Source:VGNC Symbol;Acc:VGNC:35118]	SOBP	-2.47202	1.72336	1.25395e-05	0.000570955
ENSBTAG00000033166	#NA	#NA	-4.14651	0.372267	1.28855e-05	0.000584702
ENSBTAG00000017448	EGF containing fibulin extracellular matrix protein 1 [Source:VGNC Symbol;Acc:VGNC:28348]	EFEMP1	-2.26241	7.35806	1.35186e-05	0.000609258
ENSBTAG00000048529	#NA	#NA	-3.65057	-0.109259	1.37932e-05	0.000615352
ENSBTAG00000021316	collagen type IV alpha 3 chain [Source:VGNC Symbol;Acc:VGNC:55339]	COL4A3	-1.81291	4.89444	1.4653e-05	0.000640764
ENSBTAG00000036183	F-box and WD repeat domain containing 8 [Source:VGNC Symbol;Acc:VGNC:58599]	FBXW8	-2.20181	4.76907	1.50559e-05	0.000656219
ENSBTAG00000013414	biliverdin reductase A [Source:VGNC Symbol;Acc:VGNC:26510]	BLVRA	-1.77426	5.31549	1.61166e-05	0.000695587
ENSBTAG00000019791	grainyhead like transcription factor 3 [Source:VGNC Symbol;Acc:VGNC:29636]	GRHL3	-1.99781	5.46503	1.62022e-05	0.000697012
ENSBTAG00000035706	myocardin [Source:VGNC Symbol;Acc:VGNC:31834]	MYOCD	-2.9123	0.817578	1.6709e-05	0.000715435
ENSBTAG00000008743	aldehyde dehydrogenase 2 family member [Source:NCBI gene (formerly Entrezgene);Acc:508629]	ALDH2	-1.92283	6.72511	1.67385e-05	0.000715435
ENSBTAG00000021272	ATP binding cassette subfamily G member 1 [Source:VGNC Symbol;Acc:VGNC:25483]	ABCG1	-2.64998	0.448165	1.68203e-05	0.00071662
ENSBTAG00000013004	inter-alpha-trypsin inhibitor heavy chain 5 [Source:VGNC Symbol;Acc:VGNC:30337]	ITIH5	-2.54569	6.42659	1.75059e-05	0.00074344
ENSBTAG00000019164	Rho related BTB domain containing 1 [Source:VGNC Symbol;Acc:VGNC:33945]	RHOBTB1	-2.24025	3.40902	1.78393e-05	0.000750384
ENSBTAG00000048939	#NA	#NA	-4.25085	-1.3184	1.86222e-05	0.000780834
ENSBTAG00000012312	receptor tyrosine kinase like orphan receptor 1 [Source:VGNC Symbol;Acc:VGNC:55673]	ROR1	-1.90366	3.78232	1.89095e-05	0.000787897
ENSBTAG00000045925	Cbp/p300 interacting transactivator with Glu/Asp rich carboxy-terminal domain 1 [Source:VGNC Symbol;Acc:VGNC:27376]	CITED1	-4.1792	0.689097	1.93081e-05	0.000796983
ENSBTAG00000047416	hephaestin [Source:VGNC Symbol;Acc:VGNC:29812]	HEPH	-1.81498	3.34606	1.96675e-05	0.0008093
ENSBTAG00000018281	glutathione peroxidase 7 [Source:VGNC Symbol;Acc:VGNC:29621]	GPX7	-2.26514	3.79537	2.04537e-05	0.000833883
ENSBTAG00000003977	solute carrier family 52 member 3 [Source:VGNC Symbol;Acc:VGNC:34902]	SLC52A3	-4.58326	-0.793426	2.09723e-05	0.000849795
ENSBTAG00000004555	LDL receptor related protein 2 [Source:VGNC Symbol;Acc:VGNC:30990]	LRP2	-2.56445	5.17278	2.11516e-05	0.000854446
ENSBTAG00000018041	acyl-CoA dehydrogenase short/branched chain [Source:VGNC Symbol;Acc:VGNC:50245]	ACADSB	-1.93415	4.10634	2.12299e-05	0.000855005
ENSBTAG00000016206	monoamine oxidase A [Source:VGNC Symbol;Acc:VGNC:31174]	MAOA	-2.03508	5.82982	2.13548e-05	0.000855728
ENSBTAG00000020936	nucleotide binding oligomerization domain containing 2 [Source:VGNC Symbol;Acc:VGNC:32151]	NOD2	-1.95062	3.25949	2.13771e-05	0.000855728
ENSBTAG00000012317	purine nucleoside phosphorylase [Source:NCBI gene (formerly Entrezgene);Acc:493724]	PNP	-1.65705	7.09408	2.15561e-05	0.000860295
ENSBTAG00000011732	post-GPI attachment to proteins phospholipase 3 [Source:VGNC Symbol;Acc:VGNC:32783]	PGAP3	-1.82589	4.47838	2.22968e-05	0.000887185
ENSBTAG00000011482	solute carrier family 43 member 2 [Source:VGNC Symbol;Acc:VGNC:34875]	SLC43A2	-2.34817	7.12566	2.24364e-05	0.000887529
ENSBTAG00000008575	cingulin like 1 [Source:VGNC Symbol;Acc:VGNC:27259]	CGNL1	-1.88308	4.48453	2.24394e-05	0.000887529
ENSBTAG00000006579	prolyl 4-hydroxylase subunit alpha 3 [Source:VGNC Symbol;Acc:VGNC:32537]	P4HA3	-2.95437	4.78892	2.34414e-05	0.000921658
ENSBTAG00000014940	potassium voltage-gated channel subfamily A regulatory beta subunit 3 [Source:VGNC Symbol;Acc:VGNC:30429]	KCNAB3	-2.46055	0.816182	2.37622e-05	0.000928199
ENSBTAG00000002430	collagen type XVII alpha 1 chain [Source:VGNC Symbol;Acc:VGNC:27558]	COL17A1	-2.18961	4.90817	2.46496e-05	0.000954993
ENSBTAG00000021971	synuclein alpha interacting protein [Source:VGNC Symbol;Acc:VGNC:35060]	SNCAIP	-3.82164	1.53888	2.5571e-05	0.000984928
ENSBTAG00000046803	growth arrest specific 1 [Source:VGNC Symbol;Acc:VGNC:29256]	GAS1	-3.60539	6.40748	2.63557e-05	0.00100929
ENSBTAG00000016208	transglutaminase 2 [Source:VGNC Symbol;Acc:VGNC:35810]	TGM2	-2.28365	8.01351	2.68764e-05	0.00102038
ENSBTAG00000033080	ribosomal protein L15 [Source:NCBI gene (formerly Entrezgene);Acc:507151]	RPL15	-1.49251	5.66389	2.8726e-05	0.00108749
ENSBTAG00000009835	calcium voltage-gated channel subunit alpha1 G [Source:VGNC Symbol;Acc:VGNC:26677]	CACNA1G	-2.38257	2.76753	2.91232e-05	0.00109938
ENSBTAG00000017466	hyperpolarization activated cyclic nucleotide gated potassium channel 4 [Source:VGNC Symbol;Acc:VGNC:29779]	HCN4	-2.01177	4.34126	3.11922e-05	0.00117081
ENSBTAG00000050392	family with sequence similarity 171 member B [Source:NCBI gene (formerly Entrezgene);Acc:614438]	FAM171B	-2.14733	1.90246	3.14984e-05	0.00117897
ENSBTAG00000021176	cysteine rich secretory protein LCCL domain containing 2 [Source:VGNC Symbol;Acc:VGNC:27715]	CRISPLD2	-1.71096	8.26474	3.16178e-05	0.0011801
ENSBTAG00000012820	syntaxin 3 [Source:VGNC Symbol;Acc:VGNC:35439]	STX3	-1.79502	4.33802	3.17902e-05	0.00118316
ENSBTAG00000000448	3-hydroxybutyrate dehydrogenase 1 [Source:VGNC Symbol;Acc:VGNC:26457]	BDH1	-2.10611	3.42337	3.30056e-05	0.00122158
ENSBTAG00000054750	#NA	#NA	-2.95861	1.93316	3.33071e-05	0.00122589
ENSBTAG00000049220	#NA	#NA	-5.44108	-0.111499	3.3719e-05	0.00123079
ENSBTAG00000004760	pancreatic polypeptide receptor 1 [Source:NCBI gene (formerly Entrezgene);Acc:505889]	PPYR1	-3.29375	1.57667	3.40555e-05	0.00123855
ENSBTAG00000014615	solute carrier family 26 member 2 [Source:VGNC Symbol;Acc:VGNC:34777]	SLC26A2	-1.71576	4.79355	3.41185e-05	0.00123855
ENSBTAG00000011266	zinc finger and BTB domain containing 16 [Source:VGNC Symbol;Acc:VGNC:37062]	ZBTB16	-1.90949	5.05805	3.60267e-05	0.00130425
ENSBTAG00000016729	potassium sodium-activated channel subfamily T member 2 [Source:VGNC Symbol;Acc:VGNC:30495]	KCNT2	-3.1245	0.367091	3.63988e-05	0.00131055
ENSBTAG00000051780	ribonuclease A family member 12 (inactive) [Source:NCBI gene (formerly Entrezgene);Acc:100297737]	RNASE12	-5.70162	-0.986282	3.69872e-05	0.00132454
ENSBTAG00000020843	proprotein convertase subtilisin/kexin type 1 [Source:VGNC Symbol;Acc:VGNC:32646]	PCSK1	-2.22782	2.23953	3.79477e-05	0.0013444
ENSBTAG00000021381	dishevelled associated activator of morphogenesis 2 [Source:VGNC Symbol;Acc:VGNC:27863]	DAAM2	-5.50879	-1.09038	3.84943e-05	0.00136013
ENSBTAG00000052031	#NA	#NA	-1.89294	3.54205	3.93056e-05	0.00137777
ENSBTAG00000046419	two pore channel 3 [Source:NCBI gene (formerly Entrezgene);Acc:100297753]	TPC3	-2.83777	2.41316	4.02861e-05	0.00140103
ENSBTAG00000016007	alcohol dehydrogenase 5 (class III), chi polypeptide [Source:NCBI gene (formerly Entrezgene);Acc:505515]	ADH5	-1.59026	5.56135	4.05848e-05	0.00140404
ENSBTAG00000016963	ADAM metallopeptidase with thrombospondin type 1 motif 6 [Source:VGNC Symbol;Acc:VGNC:25628]	ADAMTS6	-2.13458	3.43539	4.10723e-05	0.00141721
ENSBTAG00000003508	cilia and flagella associated protein 69 [Source:VGNC Symbol;Acc:VGNC:27249]	CFAP69	-2.6028	0.473374	4.16821e-05	0.00143451
ENSBTAG00000009654	lysophosphatidic acid receptor 1 [Source:VGNC Symbol;Acc:VGNC:30955]	LPAR1	-2.58909	1.8038	4.19972e-05	0.00143901
ENSBTAG00000052771	#NA	#NA	-2.16777	0.846318	4.3308e-05	0.00147584
ENSBTAG00000003929	PHD finger protein 10 [Source:VGNC Symbol;Acc:VGNC:32813]	PHF10	-1.60108	5.21353	4.54958e-05	0.00154569
ENSBTAG00000051164	WD repeat domain 35 [Source:NCBI gene (formerly Entrezgene);Acc:100337107]	WDR35	-1.70556	5.20203	4.69649e-05	0.00158342
ENSBTAG00000052796	uncharacterized LOC614914 [Source:NCBI gene (formerly Entrezgene);Acc:614914]	0	-4.29069	-1.29783	4.75901e-05	0.00159574
ENSBTAG00000022449	stearoyl-CoA desaturase 5 [Source:VGNC Symbol;Acc:VGNC:34328]	SCD5	-1.94512	3.24035	4.78119e-05	0.00159574
ENSBTAG00000016315	coactosin like F-actin binding protein 1 [Source:VGNC Symbol;Acc:VGNC:27626]	COTL1	-1.80375	7.7308	4.77862e-05	0.00159574
ENSBTAG00000006044	kelch like family member 5 [Source:VGNC Symbol;Acc:VGNC:30668]	KLHL5	-2.57407	3.07861	4.8971e-05	0.00162623
ENSBTAG00000053556	#NA	#NA	-1.75709	3.69979	4.97111e-05	0.00164668
ENSBTAG00000004732	spectrin beta, erythrocytic [Source:VGNC Symbol;Acc:VGNC:35252]	SPTB	-2.62916	0.712585	4.99004e-05	0.00164883
ENSBTAG00000014466	V-set domain containing T cell activation inhibitor 1 [Source:VGNC Symbol;Acc:VGNC:36848]	VTCN1	-7.88351	-0.767641	5.23624e-05	0.00170887
ENSBTAG00000009902	aldo-keto reductase family 1, member B1 (aldose reductase) [Source:NCBI gene (formerly Entrezgene);Acc:317748]	AKR1B1	-1.99221	6.14702	5.22562e-05	0.00170887
ENSBTAG00000000246	malic enzyme 3 [Source:VGNC Symbol;Acc:VGNC:31341]	ME3	-2.35084	0.91724	5.37823e-05	0.00173809
ENSBTAG00000001132	glycosyltransferase like domain containing 1 [Source:VGNC Symbol;Acc:VGNC:29690]	GTDC1	-2.6412	1.58481	5.66556e-05	0.00180888
ENSBTAG00000014670	brain expressed X-linked 5 [Source:VGNC Symbol;Acc:VGNC:50553]	BEX5	-2.23575	1.25914	5.75743e-05	0.0018294
ENSBTAG00000006491	amylo-alpha-1, 6-glucosidase, 4-alpha-glucanotransferase [Source:VGNC Symbol;Acc:VGNC:25729]	AGL	-1.77158	3.53857	5.89798e-05	0.00186511
ENSBTAG00000003619	SEC24 homolog D, COPII coat complex component [Source:VGNC Symbol;Acc:VGNC:34416]	SEC24D	-1.51296	7.0371	5.93726e-05	0.00187306
ENSBTAG00000053861	#NA	#NA	-2.25479	1.463	6.21938e-05	0.00195046
ENSBTAG00000048246	dipeptidyl peptidase 4 [Source:NCBI gene (formerly Entrezgene);Acc:281122]	DPP4	-3.99023	-0.408866	6.25177e-05	0.00195368
ENSBTAG00000015241	epoxide hydrolase 2 [Source:VGNC Symbol;Acc:VGNC:28542]	EPHX2	-3.39371	0.00237949	6.30457e-05	0.00196554
ENSBTAG00000012263	ArfGAP with SH3 domain, ankyrin repeat and PH domain 3 [Source:VGNC Symbol;Acc:VGNC:54406]	ASAP3	-2.12188	3.63086	6.34369e-05	0.0019731
ENSBTAG00000012074	MYB proto-oncogene, transcription factor [Source:VGNC Symbol;Acc:VGNC:31776]	MYB	-2.19157	3.43706	6.46697e-05	0.00200204
ENSBTAG00000018737	glomulin, FKBP associated protein [Source:VGNC Symbol;Acc:VGNC:29408]	GLMN	-1.7151	3.85566	6.77468e-05	0.00209241
ENSBTAG00000008709	protein O-glucosyltransferase 3 [Source:VGNC Symbol;Acc:VGNC:30518]	POGLUT3	-2.02328	3.00609	6.8096e-05	0.00209611
ENSBTAG00000052731	golgi associated kinase 1A [Source:NCBI gene (formerly Entrezgene);Acc:112443440]	GASK1A	-4.59885	-0.489163	7.46002e-05	0.0022828
ENSBTAG00000001335	growth hormone receptor [Source:VGNC Symbol;Acc:VGNC:50184]	GHR	-1.78238	4.46931	7.51207e-05	0.00228593
ENSBTAG00000013148	claudin 1 [Source:VGNC Symbol;Acc:VGNC:27402]	CLDN1	-1.88127	8.28498	7.54407e-05	0.00228739
ENSBTAG00000047635	maestro [Source:VGNC Symbol;Acc:VGNC:31608]	MRO	-3.27	-0.987162	7.58105e-05	0.00228901
ENSBTAG00000021741	ribosomal protein S6 kinase A2 [Source:VGNC Symbol;Acc:VGNC:34141]	RPS6KA2	-2.08314	3.21887	8.01658e-05	0.00239773
ENSBTAG00000004038	4-aminobutyrate aminotransferase [Source:VGNC Symbol;Acc:VGNC:25454]	ABAT	-1.86806	3.18975	8.24078e-05	0.00244821
ENSBTAG00000039190	solute carrier family 9 member A5 [Source:VGNC Symbol;Acc:VGNC:34944]	SLC9A5	-2.4894	3.96433	8.35818e-05	0.0024665
ENSBTAG00000010793	coiled-coil domain containing 80 [Source:VGNC Symbol;Acc:VGNC:26918]	CCDC80	-2.03737	7.36332	8.53391e-05	0.00251276
ENSBTAG00000010411	ADAM metallopeptidase with thrombospondin type 1 motif 8 [Source:VGNC Symbol;Acc:VGNC:25629]	ADAMTS8	-2.19132	1.62691	8.86425e-05	0.00259848
ENSBTAG00000008527	serine and arginine rich splicing factor 6 [Source:VGNC Symbol;Acc:VGNC:57028]	SRSF6	-1.53712	8.16018	8.91587e-05	0.00260784
ENSBTAG00000015235	hemicentin 1 [Source:VGNC Symbol;Acc:VGNC:29872]	HMCN1	-1.8318	6.25987	8.99219e-05	0.0026186
ENSBTAG00000012992	cadherin 6 [Source:VGNC Symbol;Acc:VGNC:27105]	CDH6	-3.40456	-0.51519	9.78628e-05	0.00279591
ENSBTAG00000016826	G protein-coupled receptor 176 [Source:VGNC Symbol;Acc:VGNC:29572]	GPR176	-2.61169	0.101603	9.79094e-05	0.00279591
ENSBTAG00000002910	enoyl-CoA hydratase domain containing 2 [Source:VGNC Symbol;Acc:VGNC:55168]	ECHDC2	-2.31446	3.61413	9.84656e-05	0.00280574
ENSBTAG00000013472	collagen type I alpha 2 chain [Source:VGNC Symbol;Acc:VGNC:27561]	COL1A2	-2.03068	12.0359	9.90427e-05	0.00281613
ENSBTAG00000007394	ribosomal protein L22 like 1 [Source:NCBI gene (formerly Entrezgene);Acc:614872]	RPL22L1	-1.7999	2.45767	0.000102779	0.0028975
ENSBTAG00000000170	glutathione S-transferase, theta 4 [Source:NCBI gene (formerly Entrezgene);Acc:506093]	GSTT4	-1.93813	4.18967	0.000103938	0.00292395
ENSBTAG00000016691	laccase domain containing 1 [Source:NCBI gene (formerly Entrezgene);Acc:537649]	LACC1	-1.6823	4.8822	0.000109472	0.00306013
ENSBTAG00000047213	G protein-coupled receptor associated sorting protein 1 [Source:NCBI gene (formerly Entrezgene);Acc:112441497]	0	-2.0818	1.74506	0.000112706	0.00313072
ENSBTAG00000004593	DNA topoisomerase II beta [Source:VGNC Symbol;Acc:VGNC:49158]	TOP2B	-1.96858	7.34209	0.000112542	0.00313072
ENSBTAG00000018563	secreted frizzled related protein 2 [Source:VGNC Symbol;Acc:VGNC:34521]	SFRP2	-1.98371	10.78	0.000114097	0.00315849
ENSBTAG00000025803	inhibitory synaptic factor 1 [Source:VGNC Symbol;Acc:VGNC:55116]	INSYN1	-2.50789	0.218828	0.000115693	0.00318238
ENSBTAG00000054075	#NA	#NA	-2.44702	0.501307	0.000121088	0.00329448
ENSBTAG00000027444	supervillin [Source:NCBI gene (formerly Entrezgene);Acc:281509]	SVIL	-2.29851	5.35997	0.00012386	0.00336301
ENSBTAG00000040277	H4 clustered histone 4 [Source:VGNC Symbol;Acc:VGNC:83562]	H4C4	-2.94276	-0.368201	0.000124541	0.00337372
ENSBTAG00000020590	frizzled class receptor 2 [Source:VGNC Symbol;Acc:VGNC:29167]	FZD2	-2.14107	4.35031	0.00012573	0.00339292
ENSBTAG00000020279	ALG9 alpha-1,2-mannosyltransferase [Source:NCBI gene (formerly Entrezgene);Acc:504346]	0	-1.54309	4.5868	0.000126672	0.00339758
ENSBTAG00000007870	FKBP prolyl isomerase 14 [Source:VGNC Symbol;Acc:VGNC:29019]	FKBP14	-1.4856	5.0359	0.000126539	0.00339758
ENSBTAG00000021940	coiled-coil domain containing 149 [Source:VGNC Symbol;Acc:VGNC:26855]	CCDC149	-2.45617	0.504271	0.000129345	0.00344834
ENSBTAG00000011810	angiopoietin like 2 [Source:VGNC Symbol;Acc:VGNC:25891]	ANGPTL2	-1.59268	7.52656	0.000130607	0.00347497
ENSBTAG00000000745	aquaporin 1 (Colton blood group) [Source:NCBI gene (formerly Entrezgene);Acc:282653]	AQP1	-2.3031	5.47141	0.000131891	0.00350012
ENSBTAG00000009086	lysyl oxidase like 1 [Source:VGNC Symbol;Acc:VGNC:30952]	LOXL1	-1.78065	8.35785	0.000132939	0.00351586
ENSBTAG00000052091	#NA	#NA	-3.84872	-1.00712	0.000135965	0.00358871
ENSBTAG00000019470	NIMA related kinase 6 [Source:VGNC Symbol;Acc:VGNC:31997]	NEK6	-1.77641	4.84276	0.000136677	0.00360034
ENSBTAG00000024081	extracellular matrix protein 2 [Source:VGNC Symbol;Acc:VGNC:28312]	ECM2	-2.15297	4.66634	0.000140488	0.00368608
ENSBTAG00000023289	solute carrier family 26 member 10 [Source:VGNC Symbol;Acc:VGNC:97312]	SLC26A10	-3.0546	1.67791	0.000147775	0.00383925
ENSBTAG00000003848	attractin [Source:VGNC Symbol;Acc:VGNC:26335]	ATRN	-1.71667	5.23432	0.000150272	0.00388886
ENSBTAG00000020665	GDNF family receptor alpha 2 [Source:VGNC Symbol;Acc:VGNC:29333]	GFRA2	-2.27811	2.84585	0.000154414	0.00398051
ENSBTAG00000008140	fibroblast activation protein alpha [Source:VGNC Symbol;Acc:VGNC:28862]	FAP	-4.06209	0.919109	0.00015656	0.0040202
ENSBTAG00000021483	olfactomedin like 1 [Source:VGNC Symbol;Acc:VGNC:32421]	OLFML1	-4.69963	0.924579	0.000157695	0.00403747
ENSBTAG00000024643	ventricular zone expressed PH domain containing 1 [Source:VGNC Symbol;Acc:VGNC:36787]	VEPH1	-2.67936	0.805803	0.000157842	0.00403747
ENSBTAG00000018399	myosin heavy chain 15 [Source:VGNC Symbol;Acc:VGNC:50161]	MYH15	-2.92088	0.842562	0.000159965	0.00408388
ENSBTAG00000039132	#NA	#NA	-2.37826	2.93022	0.000160716	0.00409516
ENSBTAG00000045902	EPH receptor B2 [Source:VGNC Symbol;Acc:VGNC:54424]	EPHB2	-1.60689	5.6203	0.000162063	0.00412155
ENSBTAG00000023600	apolipoprotein D [Source:VGNC Symbol;Acc:VGNC:26031]	APOD	-1.64329	4.2417	0.000163361	0.0041466
ENSBTAG00000005776	zinc finger protein 185 with LIM domain [Source:VGNC Symbol;Acc:VGNC:37219]	ZNF185	-2.90112	0.178354	0.000189617	0.00475838
ENSBTAG00000010689	neuregulin 2 [Source:VGNC Symbol;Acc:VGNC:55226]	NRG2	-4.23844	-1.08857	0.000196087	0.00488507
ENSBTAG00000012629	zinc finger protein 362 [Source:VGNC Symbol;Acc:VGNC:37258]	ZNF362	-1.79016	3.67205	0.000196509	0.00488507
ENSBTAG00000023377	SH3 domain binding protein 5 [Source:VGNC Symbol;Acc:VGNC:34568]	SH3BP5	-1.91504	3.08922	0.000196985	0.00488774
ENSBTAG00000018948	hypoxia inducible factor 3 subunit alpha [Source:VGNC Symbol;Acc:VGNC:29850]	HIF3A	-2.07923	4.24747	0.000203899	0.0050146
ENSBTAG00000018404	protein kinase cGMP-dependent 1 [Source:VGNC Symbol;Acc:VGNC:33340]	PRKG1	-2.15498	0.910903	0.000204887	0.00502733
ENSBTAG00000009226	signal peptide, CUB domain and EGF like domain containing 3 [Source:VGNC Symbol;Acc:VGNC:34373]	SCUBE3	-2.14116	2.47224	0.000206236	0.00505106
ENSBTAG00000001112	spermine oxidase [Source:VGNC Symbol;Acc:VGNC:35028]	SMOX	-1.72593	4.45281	0.000206982	0.00505998
ENSBTAG00000008380	integrin subunit alpha 11 [Source:VGNC Symbol;Acc:VGNC:30312]	ITGA11	-3.61947	-1.15764	0.000213096	0.00517128
ENSBTAG00000008733	MAGE family member D1 [Source:VGNC Symbol;Acc:VGNC:55062]	MAGED1	-1.61249	7.96291	0.000213504	0.00517171
ENSBTAG00000004034	sestrin 3 [Source:VGNC Symbol;Acc:VGNC:34490]	SESN3	-4.38904	-1.28976	0.000216091	0.00521357
ENSBTAG00000031572	intraflagellar transport 80 [Source:VGNC Symbol;Acc:VGNC:59338]	IFT80	-1.65947	4.31588	0.000216413	0.00521357
ENSBTAG00000009265	nuclear receptor subfamily 5 group A member 2 [Source:VGNC Symbol;Acc:VGNC:32249]	NR5A2	-1.90966	2.89182	0.000217012	0.00521854
ENSBTAG00000003498	FAT atypical cadherin 2 [Source:VGNC Symbol;Acc:VGNC:58375]	FAT2	-1.72568	3.37711	0.000221358	0.0053134
ENSBTAG00000013222	CD109 molecule [Source:VGNC Symbol;Acc:VGNC:27002]	CD109	-1.59694	8.13721	0.00022282	0.00533881
ENSBTAG00000018130	microtubule associated protein 2 [Source:VGNC Symbol;Acc:VGNC:31182]	MAP2	-2.30738	2.25902	0.0002238	0.00535261
ENSBTAG00000000672	OTU deubiquitinase with linear linkage specificity like [Source:VGNC Symbol;Acc:VGNC:28712]	OTULINL	-1.70701	5.44927	0.000225209	0.00537661
ENSBTAG00000019722	guanylate cyclase 2C [Source:VGNC Symbol;Acc:VGNC:29722]	GUCY2C	-2.44439	2.2962	0.000230404	0.00546127
ENSBTAG00000005431	LIM and cysteine rich domains 1 [Source:VGNC Symbol;Acc:VGNC:30926]	LMCD1	-2.0222	1.87563	0.000237148	0.00559112
ENSBTAG00000005785	dpy-19 like C-mannosyltransferase 1 [Source:VGNC Symbol;Acc:VGNC:28192]	DPY19L1	-1.72501	6.85441	0.000238239	0.00560688
ENSBTAG00000021263	cytochrome P450, family 4, subfamily V, polypeptide 2 [Source:NCBI gene (formerly Entrezgene);Acc:510156]	CYP4V2	-2.06458	1.55571	0.000239223	0.00562004
ENSBTAG00000019229	transmembrane protein 144 [Source:VGNC Symbol;Acc:VGNC:35976]	TMEM144	-2.19101	1.37821	0.000242314	0.00567256
ENSBTAG00000018123	fibulin 5 [Source:VGNC Symbol;Acc:VGNC:28883]	FBLN5	-2.16821	2.5594	0.000242292	0.00567256
ENSBTAG00000005238	NCK associated protein 5 [Source:VGNC Symbol;Acc:VGNC:56130]	NCKAP5	-3.43254	-0.906432	0.000245829	0.00573457
ENSBTAG00000007104	junctophilin 4 [Source:VGNC Symbol;Acc:VGNC:30383]	JPH4	-2.57396	0.87125	0.000247511	0.00574763
ENSBTAG00000017709	attractin like 1 [Source:VGNC Symbol;Acc:VGNC:55934]	ATRNL1	-3.70118	0.385586	0.000250536	0.00579338
ENSBTAG00000034338	HOATZ cilia and flagella associated protein [Source:VGNC Symbol;Acc:VGNC:54859]	HOATZ	-2.62209	-1.00784	0.000254656	0.00585796
ENSBTAG00000011986	phospholipid scramblase 4 [Source:VGNC Symbol;Acc:VGNC:33053]	PLSCR4	-1.82665	3.74383	0.000260666	0.00594462
ENSBTAG00000019366	RNA polymerase II subunit B [Source:VGNC Symbol;Acc:VGNC:33136]	POLR2B	-1.79433	6.92826	0.000266248	0.0060511
ENSBTAG00000017260	phosphodiesterase 3A [Source:VGNC Symbol;Acc:VGNC:54467]	PDE3A	-2.59508	2.4367	0.000269506	0.00609379
ENSBTAG00000011936	ATPase phospholipid transporting 8B4 (putative) [Source:NCBI gene (formerly Entrezgene);Acc:100137953]	ATP8B4	-2.99178	-0.84278	0.000272011	0.00610225
ENSBTAG00000003015	sestrin 1 [Source:VGNC Symbol;Acc:VGNC:34488]	SESN1	-1.79494	5.24886	0.00027451	0.00614401
ENSBTAG00000021469	cortactin binding protein 2 [Source:VGNC Symbol;Acc:VGNC:27822]	CTTNBP2	-3.21415	-1.20575	0.000278181	0.00621569
ENSBTAG00000009552	ATPase plasma membrane Ca2+ transporting 1 [Source:VGNC Symbol;Acc:VGNC:26293]	ATP2B1	-1.79322	7.62069	0.000282443	0.00630029
ENSBTAG00000025029	mannosidase alpha class 2A member 1 [Source:VGNC Symbol;Acc:VGNC:31164]	MAN2A1	-1.7607	6.2792	0.000283046	0.00630313
ENSBTAG00000002278	fibrillin 1 [Source:VGNC Symbol;Acc:VGNC:28885]	FBN1	-1.7238	8.68256	0.000283769	0.00630863
ENSBTAG00000044141	maestro heat like repeat family member 7 [Source:NCBI gene (formerly Entrezgene);Acc:522301]	MROH7	-1.9791	3.97692	0.00029331	0.00648807
ENSBTAG00000006177	zinc finger DHHC-type palmitoyltransferase 20 [Source:VGNC Symbol;Acc:VGNC:37136]	ZDHHC20	-1.5297	7.26737	0.000301885	0.00666662
ENSBTAG00000051499	#NA	#NA	-3.02291	0.0584063	0.000303641	0.00667859
ENSBTAG00000001514	ankyrin repeat and SOCS box containing 11 [Source:VGNC Symbol;Acc:VGNC:26188]	ASB11	-1.90763	3.51864	0.000303446	0.00667859
ENSBTAG00000017655	palmdelphin [Source:VGNC Symbol;Acc:VGNC:32560]	PALMD	-2.65772	1.37421	0.000305172	0.00668192
ENSBTAG00000017222	catenin delta 2 [Source:VGNC Symbol;Acc:VGNC:27806]	CTNND2	-2.63363	-0.312399	0.000306405	0.00668841
ENSBTAG00000019267	matrix metallopeptidase 2 [Source:VGNC Symbol;Acc:VGNC:31524]	MMP2	-1.70793	9.02543	0.000307291	0.00669672
ENSBTAG00000000737	Dmx like 2 [Source:VGNC Symbol;Acc:VGNC:55110]	DMXL2	-2.04119	3.95683	0.000320879	0.00698136
ENSBTAG00000019712	ST14 transmembrane serine protease matriptase [Source:NCBI gene (formerly Entrezgene);Acc:767617]	ST14	-1.84895	2.424	0.000321748	0.0069888
ENSBTAG00000032887	SPT3 homolog, SAGA and STAGA complex component [Source:VGNC Symbol;Acc:VGNC:35479]	SUPT3H	-1.79332	2.30656	0.000340738	0.00730546
ENSBTAG00000019349	solute carrier family 6 member 4 [Source:VGNC Symbol;Acc:VGNC:49971]	SLC6A4	-2.57326	-0.00391823	0.000342944	0.00734088
ENSBTAG00000032613	secretogranin V [Source:VGNC Symbol;Acc:VGNC:34334]	SCG5	-2.99568	-0.117647	0.000345535	0.00738441
ENSBTAG00000004650	zinc finger protein 516 [Source:VGNC Symbol;Acc:VGNC:37294]	ZNF516	-2.00927	2.57181	0.000346618	0.00739564
ENSBTAG00000030686	ribonucleoprotein, PTB binding 2 [Source:VGNC Symbol;Acc:VGNC:33766]	RAVER2	-2.64777	0.149028	0.000348793	0.00743009
ENSBTAG00000021632	methionine sulfoxide reductase A [Source:VGNC Symbol;Acc:VGNC:31705]	MSRA	-2.19837	0.988583	0.000349568	0.00743464
ENSBTAG00000010671	GLI family zinc finger 3 [Source:VGNC Symbol;Acc:VGNC:29401]	GLI3	-1.63615	7.0625	0.000360759	0.00763587
ENSBTAG00000009115	splA/ryanodine receptor domain and SOCS box containing 4 [Source:VGNC Symbol;Acc:VGNC:35249]	SPSB4	-3.43341	-0.753819	0.000370492	0.00780447
ENSBTAG00000011063	cathepsin O [Source:VGNC Symbol;Acc:VGNC:53898]	CTSO	-1.7361	1.42934	0.000372859	0.00784188
ENSBTAG00000005308	angiopoietin like 5 [Source:VGNC Symbol;Acc:VGNC:50062]	ANGPTL5	-3.75164	-1.03765	0.000375392	0.00786812
ENSBTAG00000010732	matrix metallopeptidase 23 [Source:VGNC Symbol;Acc:VGNC:53594]	MMP23	-1.82633	6.25293	0.0003792	0.00791169
ENSBTAG00000004231	glycoprotein M6A [Source:VGNC Symbol;Acc:VGNC:97275]	GPM6A	-1.70318	8.03951	0.000379761	0.00791169
ENSBTAG00000013499	LIM homeobox 9 [Source:VGNC Symbol;Acc:VGNC:30878]	LHX9	-1.86796	2.73537	0.000394424	0.00816581
ENSBTAG00000054686	CRACD like [Source:VGNC Symbol;Acc:VGNC:102819]	CRACDL	-1.67492	3.43809	0.000421834	0.00861217
ENSBTAG00000005711	neuronal vesicle trafficking associated 1 [Source:VGNC Symbol;Acc:VGNC:32276]	NSG1	-2.40876	0.430271	0.000426917	0.00867583
ENSBTAG00000047362	reticulocalbin 1 [Source:VGNC Symbol;Acc:VGNC:33831]	RCN1	-1.64471	7.8736	0.00045273	0.0091304
ENSBTAG00000016137	zinc finger protein 608 [Source:VGNC Symbol;Acc:VGNC:37311]	ZNF608	-1.58589	5.50777	0.000452403	0.0091304
ENSBTAG00000004041	ankyrin repeat domain 10 [Source:VGNC Symbol;Acc:VGNC:25909]	ANKRD10	-1.49257	5.10303	0.000455927	0.00918089
ENSBTAG00000038260	aldo-keto reductase family 1 member E2 [Source:VGNC Symbol;Acc:VGNC:57038]	AKR1E2	-2.68191	0.532133	0.000460631	0.00923353
ENSBTAG00000049422	TRAF interacting protein with forkhead associated domain [Source:NCBI gene (formerly Entrezgene);Acc:783855]	TIFA	-2.02681	0.449669	0.000460104	0.00923353
ENSBTAG00000010657	adhesion G protein-coupled receptor B2 [Source:VGNC Symbol;Acc:VGNC:25659]	ADGRB2	-2.07699	4.95962	0.000473499	0.00947713
ENSBTAG00000009839	glutathione S-transferase kappa 1 [Source:VGNC Symbol;Acc:VGNC:29685]	GSTK1	-1.61036	5.05185	0.000482436	0.0096296
ENSBTAG00000001721	glycogenin 1 [Source:VGNC Symbol;Acc:VGNC:29728]	GYG1	-1.60818	3.33015	0.000490687	0.00977685
ENSBTAG00000007644	G protein subunit gamma 7 [Source:VGNC Symbol;Acc:VGNC:29468]	GNG7	-1.69584	2.64012	0.000492976	0.0098077
ENSBTAG00000004432	chordin like 1 [Source:VGNC Symbol;Acc:VGNC:84868]	CHRDL1	-1.60688	4.32337	0.000497375	0.00986559
ENSBTAG00000052570	uncharacterized LOC511229 [Source:NCBI gene (formerly Entrezgene);Acc:511229]	0	-1.77922	4.12159	0.000502011	0.00994266
ENSBTAG00000018331	C-type lectin domain family 3 member B [Source:VGNC Symbol;Acc:VGNC:27429]	CLEC3B	-6.54761	-1.65575	0.000508784	0.0100318
ENSBTAG00000004099	coiled-coil domain containing 170 [Source:VGNC Symbol;Acc:VGNC:26867]	CCDC170	-2.6005	0.7476	0.000511655	0.0100734
ENSBTAG00000002764	IGF like family receptor 1 [Source:VGNC Symbol;Acc:VGNC:30091]	IGFLR1	-1.55783	3.26642	0.000512853	0.0100821
ENSBTAG00000004835	homeobox D3 [Source:VGNC Symbol;Acc:VGNC:29933]	HOXD3	-3.08126	-0.741848	0.000519317	0.0101639
ENSBTAG00000052055	serine protease 35 [Source:NCBI gene (formerly Entrezgene);Acc:614940]	PRSS35	-1.86029	1.95169	0.000524974	0.0102443
ENSBTAG00000021466	collagen type III alpha 1 chain [Source:VGNC Symbol;Acc:VGNC:27565]	COL3A1	-1.58088	11.5704	0.00053224	0.0103709
ENSBTAG00000018223	chitinase 3 like 1 [Source:VGNC Symbol;Acc:VGNC:55039]	CHI3L1	-3.65074	-0.219554	0.000533968	0.0103892
ENSBTAG00000024269	transforming growth factor beta receptor 3 [Source:VGNC Symbol;Acc:VGNC:49979]	TGFBR3	-1.64701	5.04851	0.000536223	0.0104026
ENSBTAG00000004517	TAR (HIV-1) RNA binding protein 1 [Source:NCBI gene (formerly Entrezgene);Acc:535018]	TARBP1	-1.57	4.96833	0.000535627	0.0104026
ENSBTAG00000006479	calpain 7 [Source:VGNC Symbol;Acc:VGNC:26750]	CAPN7	-1.60398	5.30451	0.0005402	0.0104644
ENSBTAG00000011976	cytochrome P450, family 4, subfamily B, polypeptide 1 [Source:NCBI gene (formerly Entrezgene);Acc:540149]	CYP4B1	-3.35963	-0.723932	0.000542824	0.0104999
ENSBTAG00000017245	COPI coat complex subunit gamma 2 [Source:VGNC Symbol;Acc:VGNC:27597]	COPG2	-1.57566	3.56793	0.000543966	0.0105066
ENSBTAG00000020233	coiled-coil domain containing 186 [Source:VGNC Symbol;Acc:VGNC:26881]	CCDC186	-2.2637	5.39198	0.000546751	0.0105451
ENSBTAG00000048996	#NA	#NA	-2.07597	0.906813	0.000551766	0.0105997
ENSBTAG00000020578	PR/SET domain 6 [Source:VGNC Symbol;Acc:VGNC:33298]	PRDM6	-1.79165	2.64525	0.000552325	0.0105997
ENSBTAG00000002626	Rho GTPase activating protein 6 [Source:VGNC Symbol;Acc:VGNC:26099]	ARHGAP6	-2.50118	0.647696	0.00056707	0.010811
ENSBTAG00000012525	ABO, alpha 1-3-N-acetylgalactosaminyltransferase and alpha 1-3-galactosyltransferase [Source:VGNC Symbol;Acc:VGNC:25510]	ABO	-2.50455	-0.325587	0.00059131	0.0112408
ENSBTAG00000019120	WD repeat and HMG-box DNA binding protein 1 [Source:VGNC Symbol;Acc:VGNC:36878]	WDHD1	-1.64664	6.07278	0.000597801	0.0113155
ENSBTAG00000011700	plasmolipin [Source:VGNC Symbol;Acc:VGNC:33037]	PLLP	-2.60142	0.535379	0.000605553	0.0114459
ENSBTAG00000006326	aldehyde dehydrogenase 1 family member L2 [Source:VGNC Symbol;Acc:VGNC:25812]	ALDH1L2	-1.73081	5.5902	0.000629377	0.0118455
ENSBTAG00000001100	interleukin 22 receptor subunit alpha 1 [Source:VGNC Symbol;Acc:VGNC:30144]	IL22RA1	-1.92054	2.3871	0.000642027	0.0119984
ENSBTAG00000022084	#NA	#NA	-1.52996	3.83654	0.000641213	0.0119984
ENSBTAG00000012966	secernin 3 [Source:VGNC Symbol;Acc:VGNC:34368]	SCRN3	-2.03359	1.5502	0.000649502	0.012121
ENSBTAG00000048591	thrombomodulin [Source:HGNC Symbol;Acc:HGNC:11784]	THBD	-2.74255	0.380299	0.000652544	0.0121606
ENSBTAG00000049288	#NA	#NA	-2.64555	-0.425672	0.000657194	0.0122129
ENSBTAG00000019365	beta-secretase 1 [Source:VGNC Symbol;Acc:VGNC:26400]	BACE1	-1.61021	3.54088	0.000675033	0.0124225
ENSBTAG00000016972	RAB11 family interacting protein 4 [Source:VGNC Symbol;Acc:VGNC:33619]	RAB11FIP4	-2.8415	-0.809787	0.000690359	0.0126518
ENSBTAG00000011245	plexin C1 [Source:VGNC Symbol;Acc:VGNC:33064]	PLXNC1	-3.70701	-1.0255	0.000691352	0.0126525
ENSBTAG00000032301	solute carrier family 26 member 7 [Source:VGNC Symbol;Acc:VGNC:34782]	SLC26A7	-3.11138	0.684195	0.000710562	0.0129683
ENSBTAG00000019093	amylase, alpha 2B (pancreatic) [Source:NCBI gene (formerly Entrezgene);Acc:505049]	AMY2B	-2.34631	-0.163357	0.000713523	0.0130044
ENSBTAG00000020636	synapsin III [Source:VGNC Symbol;Acc:VGNC:35516]	SYN3	-2.20061	0.814625	0.000715577	0.0130239
ENSBTAG00000001002	transcription factor 7 [Source:VGNC Symbol;Acc:VGNC:35695]	TCF7	-1.75826	2.64822	0.000716886	0.0130298
ENSBTAG00000051307	#NA	#NA	-2.21879	1.96007	0.000737024	0.0133409
ENSBTAG00000005313	EPH receptor B3 [Source:VGNC Symbol;Acc:VGNC:28539]	EPHB3	-1.80659	5.292	0.000738953	0.0133508
ENSBTAG00000019011	phosphoglucomutase 1 [Source:VGNC Symbol;Acc:VGNC:32793]	PGM1	-1.33626	5.91299	0.000739583	0.0133508
ENSBTAG00000032148	transmembrane protein 117 [Source:VGNC Symbol;Acc:VGNC:35954]	TMEM117	-1.75475	0.234792	0.00074162	0.0133693
ENSBTAG00000006282	POU class 2 homeobox associating factor 1 [Source:VGNC Symbol;Acc:VGNC:33173]	POU2AF1	-1.85502	2.23098	0.000744711	0.0133886
ENSBTAG00000016881	alanyl aminopeptidase, membrane [Source:VGNC Symbol;Acc:VGNC:25960]	ANPEP	-1.99373	2.37959	0.000765424	0.0136683
ENSBTAG00000050602	hyaluronan synthase 3 [Source:NCBI gene (formerly Entrezgene);Acc:286824]	HAS3	-1.88712	4.83215	0.000769136	0.0136977
ENSBTAG00000019903	receptor activity modifying protein 2 [Source:VGNC Symbol;Acc:VGNC:33707]	RAMP2	-1.45924	4.04988	0.000770634	0.0137059
ENSBTAG00000009156	calcium/calmodulin dependent protein kinase II inhibitor 1 [Source:VGNC Symbol;Acc:VGNC:26723]	CAMK2N1	-1.4335	5.03162	0.000773977	0.0137469
ENSBTAG00000020787	phosphoinositide-3-kinase regulatory subunit 4 [Source:VGNC Symbol;Acc:VGNC:32895]	PIK3R4	-1.35966	6.05448	0.000775796	0.0137608
ENSBTAG00000002689	NME/NM23 family member 7 [Source:VGNC Symbol;Acc:VGNC:32129]	NME7	-1.61151	3.0995	0.000783538	0.013861
ENSBTAG00000019194	shieldin complex subunit 2 [Source:VGNC Symbol;Acc:VGNC:28808]	SHLD2	-2.15019	1.8534	0.000803864	0.0141638
ENSBTAG00000001250	transcription factor AP-2 alpha [Source:VGNC Symbol;Acc:VGNC:35776]	TFAP2A	-1.35644	7.42502	0.000810102	0.0142383
ENSBTAG00000007652	raftlin family member 2 [Source:VGNC Symbol;Acc:VGNC:33892]	RFTN2	-2.36918	0.692171	0.00081527	0.0143077
ENSBTAG00000018546	LPS responsive beige-like anchor protein [Source:VGNC Symbol;Acc:VGNC:30972]	LRBA	-1.50392	4.89973	0.000826075	0.014459
ENSBTAG00000008228	BEN domain containing 6 [Source:VGNC Symbol;Acc:VGNC:26469]	BEND6	-2.78505	-1.13223	0.000837749	0.0146055
ENSBTAG00000040490	coiled-coil domain containing 3 [Source:NCBI gene (formerly Entrezgene);Acc:509875]	CCDC3	-2.03627	7.66475	0.000857702	0.0149337
ENSBTAG00000016512	tetratricopeptide repeat domain 21B [Source:VGNC Symbol;Acc:VGNC:36460]	TTC21B	-1.77209	4.70521	0.000870716	0.0151404
ENSBTAG00000016857	ADAM metallopeptidase with thrombospondin type 1 motif 15 [Source:VGNC Symbol;Acc:VGNC:25619]	ADAMTS15	-1.85792	5.92678	0.000878495	0.0152557
ENSBTAG00000009217	Wnt family member 10A [Source:VGNC Symbol;Acc:VGNC:36954]	WNT10A	-2.29853	0.718739	0.000906027	0.0157132
ENSBTAG00000017662	eukaryotic elongation factor 2 kinase [Source:VGNC Symbol;Acc:VGNC:28336]	EEF2K	-1.32371	7.50722	0.000910736	0.0157742
ENSBTAG00000011589	cell division cycle 14B [Source:VGNC Symbol;Acc:VGNC:56939]	CDC14B	-1.49438	6.44184	0.00091409	0.0158116
ENSBTAG00000003192	TBC1 domain family member 16 [Source:VGNC Symbol;Acc:VGNC:35630]	TBC1D16	-1.88214	2.4404	0.000943271	0.0162169
ENSBTAG00000006694	C-X-C motif chemokine ligand 14 [Source:VGNC Symbol;Acc:VGNC:27850]	CXCL14	-3.20648	-0.0945885	0.0009681	0.0165728
ENSBTAG00000046699	signal transducer and activator of transcription 4 [Source:NCBI gene (formerly Entrezgene);Acc:515988]	STAT4	-2.14022	0.121927	0.000974942	0.0166255
ENSBTAG00000011397	unc-13 homolog B [Source:VGNC Symbol;Acc:VGNC:56987]	UNC13B	-1.58287	4.03817	0.000978631	0.0166669
ENSBTAG00000021756	zinc finger DHHC-type palmitoyltransferase 17 [Source:VGNC Symbol;Acc:VGNC:37132]	ZDHHC17	-1.49021	3.50747	0.00099856	0.016941
ENSBTAG00000053463	serine rich and transmembrane domain containing 2 [Source:NCBI gene (formerly Entrezgene);Acc:104970532]	SERTM2	-2.16589	3.09692	0.00101289	0.0171622
ENSBTAG00000012673	cyclin dependent kinase 18 [Source:VGNC Symbol;Acc:VGNC:27121]	CDK18	-1.64839	2.13579	0.00102281	0.017264
ENSBTAG00000038384	keratin 5 [Source:VGNC Symbol;Acc:VGNC:50405]	KRT5	-1.80983	1.68847	0.00102531	0.0172841
ENSBTAG00000014803	carboxypeptidase Z [Source:VGNC Symbol;Acc:VGNC:27683]	CPZ	-1.67895	2.12479	0.00103131	0.0173632
ENSBTAG00000004585	coiled-coil domain containing 30 [Source:VGNC Symbol;Acc:VGNC:26891]	CCDC30	-2.22515	1.57488	0.00104995	0.0176099
ENSBTAG00000032092	cadherin 11 [Source:VGNC Symbol;Acc:VGNC:27092]	CDH11	-1.55468	8.96041	0.00106242	0.0177965
ENSBTAG00000046155	regucalcin [Source:VGNC Symbol;Acc:VGNC:33907]	RGN	-3.04595	-0.251935	0.00109397	0.0182615
ENSBTAG00000010397	UDP-GlcNAc:betaGal beta-1,3-N-acetylglucosaminyltransferase 5 [Source:VGNC Symbol;Acc:VGNC:26381]	B3GNT5	-1.70651	1.95365	0.00111148	0.0184551
ENSBTAG00000000182	serine peptidase inhibitor, Kunitz type 2 [Source:VGNC Symbol;Acc:VGNC:49973]	SPINT2	-1.52952	5.46798	0.00114938	0.0190605
ENSBTAG00000020584	intraflagellar transport 81 [Source:VGNC Symbol;Acc:VGNC:30073]	IFT81	-1.80453	4.38689	0.00116962	0.0193476
ENSBTAG00000018861	chromosome 5 C12orf56 homolog [Source:VGNC Symbol;Acc:VGNC:49163]	C5H12orf56	-2.55055	-0.365685	0.00118046	0.0195026
ENSBTAG00000013070	ELL associated factor 2 [Source:VGNC Symbol;Acc:VGNC:28295]	EAF2	-1.81908	2.57118	0.00118592	0.0195685
ENSBTAG00000005615	carcinoembryonic antigen related cell adhesion molecule 1 [Source:NCBI gene (formerly Entrezgene);Acc:404118]	CEACAM1	-1.75826	3.81594	0.00119948	0.0197429
ENSBTAG00000049663	protein phosphatase 4 regulatory subunit 4 [Source:NCBI gene (formerly Entrezgene);Acc:537521]	0	-2.29367	0.503683	0.00120161	0.0197535
ENSBTAG00000009573	chromosome 15 C11orf49 homolog [Source:VGNC Symbol;Acc:VGNC:54857]	C15H11orf49	-2.05584	2.78168	0.00120709	0.019819
ENSBTAG00000052669	cystin 1 [Source:NCBI gene (formerly Entrezgene);Acc:100848673]	CYS1	-2.03777	0.475006	0.00121954	0.0199987
ENSBTAG00000008079	nuclear receptor binding protein 2 [Source:VGNC Symbol;Acc:VGNC:32256]	NRBP2	-1.74487	5.99883	0.00122178	0.0200106
ENSBTAG00000047287	mitochondrial amidoxime reducing component 1 [Source:VGNC Symbol;Acc:VGNC:31235]	MTARC1	-2.20544	0.0212784	0.00123411	0.0201626
ENSBTAG00000016362	POU class 6 homeobox 1 [Source:VGNC Symbol;Acc:VGNC:33180]	POU6F1	-2.16991	-0.121972	0.00126405	0.0206227
ENSBTAG00000053910	chromosome 19 C17orf58 homolog [Source:NCBI gene (formerly Entrezgene);Acc:100301295]	0	-1.58978	1.63874	0.00126538	0.0206227
ENSBTAG00000020707	adhesion G protein-coupled receptor G6 [Source:VGNC Symbol;Acc:VGNC:25669]	ADGRG6	-1.68748	6.01868	0.00128533	0.0208965
ENSBTAG00000007890	SEC14 like lipid binding 5 [Source:VGNC Symbol;Acc:VGNC:34405]	SEC14L5	-2.32516	0.0168086	0.00131374	0.0213322
ENSBTAG00000016813	SH3 domain containing 19 [Source:VGNC Symbol;Acc:VGNC:34570]	SH3D19	-1.45098	6.81744	0.00131569	0.0213377
ENSBTAG00000010986	potassium voltage-gated channel subfamily Q member 1 [Source:NCBI gene (formerly Entrezgene);Acc:784876]	KCNQ1	-1.88461	2.6001	0.00132268	0.0214248
ENSBTAG00000052054	#NA	#NA	-2.69238	1.11765	0.00132779	0.0214551
ENSBTAG00000006716	prostaglandin-endoperoxide synthase 1 [Source:VGNC Symbol;Acc:VGNC:33511]	PTGS1	-2.29833	-0.336929	0.00133872	0.0216055
ENSBTAG00000044125	transmembrane protein 56 [Source:NCBI gene (formerly Entrezgene);Acc:614522]	TLCD4	-1.53967	2.99057	0.00135549	0.0218229
ENSBTAG00000051324	#NA	#NA	-3.27297	-0.565837	0.0013855	0.022252
ENSBTAG00000047376	peptidylprolyl cis/trans isomerase, NIMA-interacting 4 [Source:VGNC Symbol;Acc:VGNC:32903]	PIN4	-1.55764	3.39786	0.00141356	0.0226478
ENSBTAG00000009390	MINDY lysine 48 deubiquitinase 4 [Source:VGNC Symbol;Acc:VGNC:53652]	MINDY4	-1.44878	3.32168	0.00145859	0.0232848
ENSBTAG00000019373	caprin family member 2 [Source:VGNC Symbol;Acc:VGNC:26752]	CAPRIN2	-1.76119	4.22867	0.001489	0.0236279
ENSBTAG00000000505	kynurenine aminotransferase 3 [Source:VGNC Symbol;Acc:VGNC:30758]	KYAT3	-1.41407	4.60774	0.00149382	0.0236759
ENSBTAG00000053662	#NA	#NA	-2.5526	0.446306	0.00149952	0.0237379
ENSBTAG00000010254	mitogen-activated protein kinase kinase kinase 6 [Source:VGNC Symbol;Acc:VGNC:31199]	MAP3K6	-1.60139	5.33775	0.00153178	0.0241621
ENSBTAG00000018862	eukaryotic translation initiation factor 4E family member 3 [Source:VGNC Symbol;Acc:VGNC:28411]	EIF4E3	-2.01839	1.88627	0.0015676	0.0246387
ENSBTAG00000047482	proline rich transmembrane protein 4 [Source:VGNC Symbol;Acc:VGNC:33411]	PRRT4	-2.04858	3.44019	0.0015845	0.0248458
ENSBTAG00000004849	immunoglobulin superfamily member 3 [Source:VGNC Symbol;Acc:VGNC:30094]	IGSF3	-1.64098	1.39241	0.00164788	0.0256876
ENSBTAG00000009111	leucine rich repeat neuronal 2 [Source:HGNC Symbol;Acc:HGNC:16914]	LRRN2	-1.97284	2.12566	0.00168547	0.0261811
ENSBTAG00000011680	papilin, proteoglycan like sulfated glycoprotein [Source:VGNC Symbol;Acc:VGNC:32571]	PAPLN	-2.31996	1.58984	0.00171397	0.0265305
ENSBTAG00000009061	fatty acyl-CoA reductase 1 [Source:VGNC Symbol;Acc:VGNC:28863]	FAR1	-1.49961	5.91092	0.00172775	0.0266193
ENSBTAG00000043036	#NA	#NA	-2.37718	0.590461	0.00173277	0.0266657
ENSBTAG00000007778	transient receptor potential cation channel subfamily M member 3 [Source:VGNC Symbol;Acc:VGNC:55085]	TRPM3	-1.96712	1.86785	0.00177708	0.0272842
ENSBTAG00000038706	metallothionein 1E [Source:NCBI gene (formerly Entrezgene);Acc:768319]	MT1E	-2.69194	0.204054	0.00179667	0.0274895
ENSBTAG00000005372	DLG associated protein 1 [Source:VGNC Symbol;Acc:VGNC:28088]	DLGAP1	-3.04428	-1.06913	0.00180657	0.0275772
ENSBTAG00000001446	ABRA C-terminal like [Source:VGNC Symbol;Acc:VGNC:25513]	ABRACL	-1.4791	3.14895	0.00181486	0.0276719
ENSBTAG00000008583	phosphatase domain containing paladin 1 [Source:VGNC Symbol;Acc:VGNC:50088]	PALD1	-2.13696	0.552172	0.00183483	0.0279443
ENSBTAG00000014069	pyruvate dehydrogenase kinase 4 [Source:VGNC Symbol;Acc:VGNC:32706]	PDK4	-3.26203	-0.795055	0.0018581	0.0281691
ENSBTAG00000016784	dynein axonemal heavy chain 7 [Source:VGNC Symbol;Acc:VGNC:50052]	DNAH7	-2.99212	-1.21798	0.00188126	0.0284551
ENSBTAG00000054331	collectin subfamily member 10 [Source:NCBI gene (formerly Entrezgene);Acc:512030]	COLEC10	-2.31363	-1.05986	0.00188411	0.0284657
ENSBTAG00000050113	#NA	#NA	-2.72482	-0.809114	0.00190108	0.0286568
ENSBTAG00000018156	keratinocyte associated protein 3 [Source:VGNC Symbol;Acc:VGNC:30752]	KRTCAP3	-2.13118	0.670529	0.00190839	0.0287343
ENSBTAG00000038662	gap junction protein beta 6 [Source:VGNC Symbol;Acc:VGNC:29381]	GJB6	-2.39087	1.05261	0.00195327	0.0293433
ENSBTAG00000008032	actin related protein 3B [Source:NCBI gene (formerly Entrezgene);Acc:616404]	0	-1.38407	4.68728	0.00197524	0.0296062
ENSBTAG00000009206	forkhead box S1 [Source:VGNC Symbol;Acc:VGNC:29108]	FOXS1	-1.79687	1.95467	0.00198822	0.0297335
ENSBTAG00000016928	PDZ domain containing 7 [Source:NCBI gene (formerly Entrezgene);Acc:511930]	0	-1.89455	1.34733	0.00203895	0.0303893
ENSBTAG00000032591	collagen triple helix repeat containing 1 [Source:VGNC Symbol;Acc:VGNC:27796]	CTHRC1	-1.56471	4.6065	0.00204336	0.0304208
ENSBTAG00000037899	delta like non-canonical Notch ligand 1 [Source:VGNC Symbol;Acc:VGNC:28092]	DLK1	-3.62048	-1.14142	0.00205574	0.0305707
ENSBTAG00000050436	small regulatory polypeptide of amino acid response [Source:NCBI gene (formerly Entrezgene);Acc:112441516]	SPAAR	-2.45243	-1.02876	0.00206189	0.0306279
ENSBTAG00000015238	desmocollin 3 [Source:VGNC Symbol;Acc:VGNC:28214]	DSC3	-1.71448	5.47732	0.00208154	0.0308506
ENSBTAG00000005367	VRK serine/threonine kinase 3 [Source:VGNC Symbol;Acc:VGNC:36836]	VRK3	-1.44256	3.22065	0.00208387	0.0308506
ENSBTAG00000039834	#NA	#NA	-2.92496	-0.0725066	0.00209351	0.0309588
ENSBTAG00000039340	sodium voltage-gated channel beta subunit 4 [Source:VGNC Symbol;Acc:VGNC:34351]	SCN4B	-1.82781	1.90542	0.00209656	0.0309669
ENSBTAG00000002996	shroom family member 4 [Source:VGNC Symbol;Acc:VGNC:34610]	SHROOM4	-1.55139	3.86327	0.00209874	0.0309669
ENSBTAG00000050434	#NA	#NA	-2.57177	-0.757977	0.00211866	0.0312261
ENSBTAG00000018181	coiled-coil domain containing 8 [Source:VGNC Symbol;Acc:VGNC:26917]	CCDC8	-1.53267	4.4415	0.00214519	0.031547
ENSBTAG00000046328	Xg glycoprotein [Source:VGNC Symbol;Acc:VGNC:56960]	XG	-1.36234	6.64029	0.00222627	0.0325946
ENSBTAG00000015856	cilia and flagella associated protein 126 [Source:VGNC Symbol;Acc:VGNC:27237]	CFAP126	-1.71106	1.64376	0.00229117	0.0333562
ENSBTAG00000017592	glycerol-3-phosphate acyltransferase 3 [Source:VGNC Symbol;Acc:VGNC:29513]	GPAT3	-1.34516	3.72353	0.00229339	0.0333562
ENSBTAG00000001640	erythrocyte membrane protein band 4.1 like 1 [Source:VGNC Symbol;Acc:VGNC:28520]	EPB41L1	-1.38046	5.88371	0.0023063	0.0334338
ENSBTAG00000026977	protein tyrosine phosphatase receptor type Q [Source:VGNC Symbol;Acc:VGNC:33556]	PTPRQ	-2.57295	-0.620785	0.00237036	0.0341754
ENSBTAG00000047545	retrotransposon Gag like 5 [Source:VGNC Symbol;Acc:VGNC:34200]	RTL5	-1.45972	4.53472	0.00239209	0.0343394
ENSBTAG00000007888	EFR3 homolog B [Source:VGNC Symbol;Acc:VGNC:28362]	EFR3B	-2.33568	-0.836588	0.00239847	0.0343936
ENSBTAG00000045885	bta-mir-3064 [Source:miRBase;Acc:MI0031503]	bta-mir-3064	-1.82404	0.177856	0.0024061	0.0344611
ENSBTAG00000044158	low density lipoprotein receptor class A domain containing 3 [Source:VGNC Symbol;Acc:VGNC:30828]	LDLRAD3	-1.7507	1.69687	0.00241768	0.0345196
ENSBTAG00000024545	dachsous cadherin-related 2 [Source:NCBI gene (formerly Entrezgene);Acc:539323]	DCHS2	-2.99463	-1.58916	0.00254864	0.0362334
ENSBTAG00000013165	ectonucleotide pyrophosphatase/phosphodiesterase 2 [Source:VGNC Symbol;Acc:VGNC:28505]	ENPP2	-1.71752	3.09419	0.00255753	0.0363146
ENSBTAG00000019497	immunoglobulin like domain containing receptor 2 [Source:VGNC Symbol;Acc:VGNC:30174]	ILDR2	-1.91752	1.69765	0.00256453	0.0363423
ENSBTAG00000015834	Rho guanine nucleotide exchange factor 4 [Source:VGNC Symbol;Acc:VGNC:55325]	ARHGEF4	-1.65418	1.1116	0.00261513	0.0370197
ENSBTAG00000002348	solute carrier family 4 member 4 [Source:VGNC Symbol;Acc:VGNC:34894]	SLC4A4	-1.7691	4.31194	0.00265186	0.0374198
ENSBTAG00000013337	dihydrodiol dehydrogenase [Source:VGNC Symbol;Acc:VGNC:28036]	DHDH	-1.52248	3.11067	0.0026566	0.0374468
ENSBTAG00000043572	#NA	#NA	-2.54665	0.694089	0.00270527	0.0380518
ENSBTAG00000019663	2,4-dienoyl-CoA reductase 1 [Source:VGNC Symbol;Acc:VGNC:27982]	DECR1	-1.68829	2.78015	0.00271456	0.038142
ENSBTAG00000049439	#NA	#NA	-2.24787	1.1685	0.00274826	0.0385339
ENSBTAG00000006241	mannosidase alpha class 2B member 1 [Source:NCBI gene (formerly Entrezgene);Acc:282272]	MAN2B1	-1.48126	7.38246	0.00274699	0.0385339
ENSBTAG00000011823	calsyntenin 1 [Source:VGNC Symbol;Acc:VGNC:27466]	CLSTN1	-1.30709	7.99864	0.00275851	0.0386366
ENSBTAG00000014878	cytochrome c oxidase subunit 7A1 [Source:VGNC Symbol;Acc:VGNC:27639]	COX7A1	-1.93512	0.365171	0.00279198	0.0389715
ENSBTAG00000019402	cilia and flagella associated protein 100 [Source:VGNC Symbol;Acc:VGNC:27236]	CFAP100	-1.75203	3.50106	0.00279255	0.0389715
ENSBTAG00000007829	cysteine sulfinic acid decarboxylase [Source:VGNC Symbol;Acc:VGNC:27749]	CSAD	-1.5511	4.51995	0.00281574	0.0392309
ENSBTAG00000017867	yippee like 1 [Source:VGNC Symbol;Acc:VGNC:37034]	YPEL1	-1.50114	2.66448	0.00282649	0.0393393
ENSBTAG00000012693	polycystin 1 like 2 [Source:NCBI gene (formerly Entrezgene);Acc:101905746]	0	-2.21947	0.629932	0.00287491	0.0397626
ENSBTAG00000050581	keratin 13 [Source:NCBI gene (formerly Entrezgene);Acc:100296555]	0	-2.35401	-0.61291	0.00288144	0.0398114
ENSBTAG00000009786	scinderin [Source:VGNC Symbol;Acc:VGNC:34339]	SCIN	-1.69805	3.76029	0.00288558	0.039827
ENSBTAG00000032427	formin homology 2 domain containing 1 [Source:VGNC Symbol;Acc:VGNC:29003]	FHOD1	-1.55973	6.91759	0.00291662	0.0402135
ENSBTAG00000009078	MIA SH3 domain containing [Source:NCBI gene (formerly Entrezgene);Acc:280857]	MIA	-2.25501	-0.187752	0.00294298	0.0405347
ENSBTAG00000006086	matrix metallopeptidase 28 [Source:VGNC Symbol;Acc:VGNC:31528]	MMP28	-1.67131	5.3111	0.00294999	0.0405891
ENSBTAG00000017866	CD36 molecule [Source:NCBI gene (formerly Entrezgene);Acc:281052]	CD36	-2.14572	-0.251602	0.00296283	0.0406813
ENSBTAG00000019877	dedicator of cytokinesis 7 [Source:VGNC Symbol;Acc:VGNC:28161]	DOCK7	-1.52626	6.54287	0.00296192	0.0406813
ENSBTAG00000006013	5'-nucleotidase domain containing 3 [Source:VGNC Symbol;Acc:VGNC:32296]	NT5DC3	-1.37137	3.20679	0.00298001	0.0408749
ENSBTAG00000027425	coiled-coil domain containing 190 [Source:VGNC Symbol;Acc:VGNC:26883]	CCDC190	-1.77101	2.86907	0.0030172	0.0412301
ENSBTAG00000007352	potassium voltage-gated channel subfamily C member 4 [Source:VGNC Symbol;Acc:VGNC:30433]	KCNC4	-1.48183	2.62051	0.00309847	0.042194
ENSBTAG00000002148	RAB3D, member RAS oncogene family [Source:VGNC Symbol;Acc:VGNC:33652]	RAB3D	-1.39325	5.16579	0.00318355	0.043043
ENSBTAG00000009125	aldehyde dehydrogenase 1 family member A3 [Source:VGNC Symbol;Acc:VGNC:59168]	ALDH1A3	-1.53129	6.12874	0.00318683	0.0430433
ENSBTAG00000053826	#NA	#NA	-1.63207	2.49084	0.00320452	0.0431942
ENSBTAG00000006862	Meis homeobox 3 [Source:VGNC Symbol;Acc:VGNC:52205]	MEIS3	-1.46026	5.11991	0.00320194	0.0431942
ENSBTAG00000051039	#NA	#NA	-1.89259	0.583784	0.00322617	0.0433978
ENSBTAG00000005250	biglycan [Source:VGNC Symbol;Acc:VGNC:26481]	BGN	-1.72203	4.11376	0.0032348	0.0434697
ENSBTAG00000031178	solute carrier family 9 member A9 [Source:VGNC Symbol;Acc:VGNC:34947]	SLC9A9	-1.76026	-0.0302267	0.00328053	0.0440395
ENSBTAG00000009230	fibulin 7 [Source:VGNC Symbol;Acc:VGNC:28884]	FBLN7	-1.9526	0.820987	0.00330755	0.0443124
ENSBTAG00000000240	A-kinase anchoring protein 7 [Source:VGNC Symbol;Acc:VGNC:25788]	AKAP7	-1.56245	1.80677	0.00331661	0.044389
ENSBTAG00000047073	#NA	#NA	-2.38031	0.310458	0.00332732	0.0444425
ENSBTAG00000015607	endoplasmic reticulum metallopeptidase 1 [Source:VGNC Symbol;Acc:VGNC:28592]	ERMP1	-1.29037	4.63838	0.00334921	0.0446449
ENSBTAG00000049129	#NA	#NA	-2.03236	-0.054826	0.00337534	0.0449125
ENSBTAG00000024801	RAN binding protein 17 [Source:VGNC Symbol;Acc:VGNC:57359]	RANBP17	-1.66264	1.59075	0.00338534	0.0449125
ENSBTAG00000002329	ArfGAP with SH3 domain, ankyrin repeat and PH domain 2 [Source:VGNC Symbol;Acc:VGNC:26185]	ASAP2	-1.59933	3.32403	0.00337773	0.0449125
ENSBTAG00000043559	NADH dehydrogenase subunit 4L [Source:NCBI gene (formerly Entrezgene);Acc:3283885]	ND4L	-1.52736	7.15194	0.00342104	0.0452835
ENSBTAG00000004757	latent transforming growth factor beta binding protein 4 [Source:VGNC Symbol;Acc:VGNC:31074]	LTBP4	-1.52812	8.19251	0.00343244	0.045389
ENSBTAG00000018810	thrombospondin 2 [Source:VGNC Symbol;Acc:VGNC:35829]	THBS2	-2.09771	0.119081	0.00349697	0.0460585
ENSBTAG00000014286	intraflagellar transport 88 [Source:VGNC Symbol;Acc:VGNC:30074]	IFT88	-1.6773	4.21591	0.00358085	0.0469301
ENSBTAG00000017397	zinc finger protein 423 [Source:VGNC Symbol;Acc:VGNC:37273]	ZNF423	-2.16826	-1.15579	0.00360636	0.0472176
ENSBTAG00000019708	acyl-CoA synthetase long chain family member 6 [Source:VGNC Symbol;Acc:VGNC:55153]	ACSL6	-1.41898	5.23227	0.00364178	0.0475932
ENSBTAG00000017746	slit guidance ligand 3 [Source:VGNC Symbol;Acc:VGNC:34961]	SLIT3	-1.67238	4.98673	0.00365953	0.0477722
ENSBTAG00000004987	nucleoporin 210 like [Source:VGNC Symbol;Acc:VGNC:32357]	NUP210L	-2.02567	-0.774101	0.00367019	0.0478643
ENSBTAG00000018347	interleukin 33 [Source:VGNC Symbol;Acc:VGNC:30155]	IL33	-1.95038	2.84738	0.00367547	0.047886
ENSBTAG00000004903	keratin 15 [Source:VGNC Symbol;Acc:VGNC:50396]	KRT15	-1.6663	5.22107	0.0037257	0.0483976
ENSBTAG00000013905	structural maintenance of chromosomes 3 [Source:VGNC Symbol;Acc:VGNC:35000]	SMC3	-1.88764	7.51963	0.00377764	0.0490242
ENSBTAG00000008465	1-aminocyclopropane-1-carboxylate synthase homolog (inactive) [Source:NCBI gene (formerly Entrezgene);Acc:505649]	ACCS	-1.67032	2.78867	0.0038046	0.0492775
ENSBTAG00000017284	rhomboid like 1 [Source:VGNC Symbol;Acc:VGNC:33935]	RHBDL1	-2.06526	5.17148	0.0038181	0.0494041
ENSBTAG00000000275	poly(ADP-ribose) polymerase family member 11 [Source:VGNC Symbol;Acc:VGNC:49073]	PARP11	-1.49203	3.60091	0.00384656	0.0496753
ENSBTAG00000015052	prospero homeobox 2 [Source:VGNC Symbol;Acc:VGNC:33370]	PROX2	-2.4972	-1.02118	0.00386441	0.0498573
ENSBTAG00000000517	ankyrin repeat domain 29 [Source:VGNC Symbol;Acc:VGNC:25921]	ANKRD29	-1.46915	3.67363	0.00387478	0.0499424
ENSBTAG00000002296	stimulator of interferon response cGAMP interactor 1 [Source:VGNC Symbol;Acc:VGNC:35997]	STING1	-1.49893	1.52722	0.00389481	0.0501518
ENSBTAG00000002504	iron responsive element binding protein 2 [Source:VGNC Symbol;Acc:VGNC:30269]	IREB2	-1.531	5.77668	0.00390067	0.0501785
ENSBTAG00000054434	#NA	#NA	-2.39887	-0.206446	0.00390954	0.0502439
ENSBTAG00000015893	epsin 3 [Source:VGNC Symbol;Acc:VGNC:28548]	EPN3	1.88016	0.318325	0.0039322	0.0504862
ENSBTAG00000049881	#NA	#NA	3.59866	-0.843611	0.00393646	0.0504919
ENSBTAG00000015178	enoyl-CoA delta isomerase 2 [Source:VGNC Symbol;Acc:VGNC:28310]	ECI2	-1.56187	2.70558	0.00397557	0.0508949
ENSBTAG00000020266	solute carrier family 19 member 2 [Source:VGNC Symbol;Acc:VGNC:34710]	SLC19A2	1.3451	3.77731	0.00397359	0.0508949
ENSBTAG00000043549	#NA	#NA	-2.07521	-0.0938453	0.00399112	0.0509955
ENSBTAG00000006884	poly(A) binding protein nuclear 1 [Source:VGNC Symbol;Acc:VGNC:53575]	PABPN1	-1.38699	5.98265	0.00398887	0.0509955
ENSBTAG00000034138	beta-hexosaminidase subunit beta [Source:NCBI gene (formerly Entrezgene);Acc:786974]	0	-1.81573	0.864801	0.00399508	0.0509969
ENSBTAG00000025496	sorbitol dehydrogenase [Source:VGNC Symbol;Acc:VGNC:35131]	SORD	-1.48506	4.01111	0.00400124	0.0510263
ENSBTAG00000005062	#NA	#NA	4.10221	-1.18477	0.00401036	0.0510935
ENSBTAG00000011316	zinc finger CCCH-type containing 12A [Source:VGNC Symbol;Acc:VGNC:37097]	ZC3H12A	1.70872	5.11518	0.00404232	0.0514512
ENSBTAG00000010462	roundabout guidance receptor 2 [Source:VGNC Symbol;Acc:VGNC:34079]	ROBO2	-1.76798	3.99013	0.00404967	0.0514953
ENSBTAG00000006320	dihydrolipoamide branched chain transacylase E2 [Source:VGNC Symbol;Acc:VGNC:27896]	DBT	-1.51775	3.89521	0.00405454	0.0515078
ENSBTAG00000048264	fibronectin leucine rich transmembrane protein 1 [Source:VGNC Symbol;Acc:VGNC:29038]	FLRT1	-3.0425	-1.0824	0.0040666	0.0515129
ENSBTAG00000000598	cystatin C [Source:NCBI gene (formerly Entrezgene);Acc:281102]	CST3	-1.4637	7.56833	0.00406421	0.0515129
ENSBTAG00000050122	#NA	#NA	1.80879	1.54888	0.00406021	0.0515129
ENSBTAG00000003018	follistatin like 3 [Source:VGNC Symbol;Acc:VGNC:29136]	FSTL3	1.79255	8.78232	0.00407072	0.0515158
ENSBTAG00000015549	protocadherin 18 [Source:VGNC Symbol;Acc:VGNC:32619]	PCDH18	-1.93882	2.29481	0.00408438	0.0516393
ENSBTAG00000018010	ATP binding cassette subfamily A member 4 [Source:VGNC Symbol;Acc:VGNC:25458]	ABCA4	-1.52062	2.91444	0.00409635	0.0517413
ENSBTAG00000021699	RAR related orphan receptor B [Source:VGNC Symbol;Acc:VGNC:34089]	RORB	-2.98956	-1.18427	0.0041084	0.0517948
ENSBTAG00000021310	collagen type IV alpha 4 chain [Source:VGNC Symbol;Acc:VGNC:50083]	COL4A4	-1.39787	4.81273	0.00410473	0.0517948
ENSBTAG00000024814	beta-1,4-N-acetyl-galactosaminyltransferase 4 [Source:VGNC Symbol;Acc:VGNC:54409]	B4GALNT4	-1.88296	2.06725	0.00412515	0.0519072
ENSBTAG00000053525	#NA	#NA	3.17802	-0.544358	0.00412424	0.0519072
ENSBTAG00000050233	proline rich and Gla domain 1 [Source:NCBI gene (formerly Entrezgene);Acc:785916]	PRRG1	-1.56122	3.75618	0.00413122	0.0519343
ENSBTAG00000006073	podocan like 1 [Source:VGNC Symbol;Acc:VGNC:33102]	PODNL1	-1.9386	2.14592	0.00413604	0.0519455
ENSBTAG00000032774	adipogenesis regulatory factor [Source:VGNC Symbol;Acc:VGNC:25680]	ADIRF	-1.49695	7.39	0.00418153	0.0524671
ENSBTAG00000020829	protein tyrosine phosphatase receptor type K [Source:VGNC Symbol;Acc:VGNC:33552]	PTPRK	-1.73357	4.14699	0.00424376	0.0531975
ENSBTAG00000008817	laminin subunit alpha 4 [Source:VGNC Symbol;Acc:VGNC:52792]	LAMA4	-3.54673	-0.979993	0.00427222	0.0535036
ENSBTAG00000004613	chondroitin sulfate N-acetylgalactosaminyltransferase 1 [Source:VGNC Symbol;Acc:VGNC:27759]	CSGALNACT1	-1.73218	0.28446	0.00429087	0.0536865
ENSBTAG00000015968	acyl-CoA synthetase family member 3 [Source:VGNC Symbol;Acc:VGNC:25563]	ACSF3	-1.77508	0.949092	0.0043042	0.0538025
ENSBTAG00000003747	prostaglandin reductase 2 [Source:NCBI gene (formerly Entrezgene);Acc:506263]	PTGR2	-1.30822	5.17751	0.00431821	0.0538759
ENSBTAG00000009443	#NA	#NA	2.53303	-0.171324	0.00431415	0.0538759
ENSBTAG00000000902	O-linked N-acetylglucosamine (GlcNAc) transferase [Source:NCBI gene (formerly Entrezgene);Acc:532053]	OGT	-1.48411	6.45989	0.00434736	0.0541377
ENSBTAG00000012774	RAB7B, member RAS oncogene family [Source:VGNC Symbol;Acc:VGNC:33661]	RAB7B	-1.41561	4.31895	0.004345	0.0541377
ENSBTAG00000017271	microtubule associated serine/threonine kinase like [Source:VGNC Symbol;Acc:VGNC:31260]	MASTL	1.44696	6.2275	0.00438949	0.054611
ENSBTAG00000017104	mucin 1, cell surface associated [Source:VGNC Symbol;Acc:VGNC:59186]	MUC1	1.76806	2.31927	0.00440269	0.0547239
ENSBTAG00000020979	nerve growth factor receptor [Source:VGNC Symbol;Acc:VGNC:32062]	NGFR	2.81468	-0.627255	0.004421	0.0548999
ENSBTAG00000021957	latent transforming growth factor beta binding protein 2 [Source:VGNC Symbol;Acc:VGNC:31072]	LTBP2	-1.29958	8.75632	0.00445474	0.0552672
ENSBTAG00000010244	chloride intracellular channel 5 [Source:NCBI gene (formerly Entrezgene);Acc:281696]	CLIC5	1.53813	4.52873	0.00448399	0.055578
ENSBTAG00000010637	arylsulfatase G [Source:VGNC Symbol;Acc:VGNC:55034]	ARSG	-1.46202	4.55479	0.00458589	0.0567666
ENSBTAG00000008607	AT-rich interaction domain 3A [Source:VGNC Symbol;Acc:VGNC:26126]	ARID3A	1.33721	4.87431	0.00458846	0.0567666
ENSBTAG00000000244	#NA	#NA	1.97771	0.038395	0.00460909	0.0569686
ENSBTAG00000052297	#NA	#NA	1.53113	1.71081	0.00462438	0.0571045
ENSBTAG00000018936	lanosterol synthase [Source:VGNC Symbol;Acc:VGNC:31065]	LSS	1.53344	7.21321	0.00467407	0.0576643
ENSBTAG00000002742	mutS homolog 2 [Source:VGNC Symbol;Acc:VGNC:31693]	MSH2	-1.28103	6.14372	0.00469348	0.0578499
ENSBTAG00000033699	cholinergic receptor muscarinic 4 [Source:VGNC Symbol;Acc:VGNC:54862]	CHRM4	1.95323	1.31118	0.00474818	0.0584656
ENSBTAG00000003794	G protein subunit alpha o1 [Source:VGNC Symbol;Acc:VGNC:57047]	GNAO1	2.10174	0.422096	0.00475226	0.0584656
ENSBTAG00000006043	#NA	#NA	2.47184	-0.723111	0.0047737	0.0586749
ENSBTAG00000010164	espin like [Source:VGNC Symbol;Acc:VGNC:28604]	ESPNL	-1.82169	2.94826	0.00478921	0.0587777
ENSBTAG00000019382	protein kinase domain containing, cytoplasmic [Source:VGNC Symbol;Acc:VGNC:32938]	PKDCC	-1.67848	5.69177	0.00479094	0.0587777
ENSBTAG00000004662	solute carrier family 16 member 12 [Source:VGNC Symbol;Acc:VGNC:34686]	SLC16A12	-1.49986	4.11669	0.00481994	0.0590788
ENSBTAG00000004902	integrator complex subunit 8 [Source:VGNC Symbol;Acc:VGNC:55054]	INTS8	-1.36175	6.41679	0.004851	0.0594046
ENSBTAG00000014151	RCSD domain containing 1 [Source:VGNC Symbol;Acc:VGNC:33837]	RCSD1	-1.31343	6.00369	0.00486346	0.0595021
ENSBTAG00000048546	#NA	#NA	-2.18175	-0.99536	0.00486808	0.0595038
ENSBTAG00000018300	TNF receptor superfamily member 19 [Source:VGNC Symbol;Acc:VGNC:53840]	TNFRSF19	-1.39544	4.62789	0.00487277	0.0595061
ENSBTAG00000039242	zinc finger protein 10 [Source:VGNC Symbol;Acc:VGNC:52850]	ZNF10	1.75961	2.01317	0.00490971	0.0599021
ENSBTAG00000005145	pseudopodium enriched atypical kinase 1 [Source:VGNC Symbol;Acc:VGNC:32733]	PEAK1	1.56535	6.63357	0.00492886	0.0600804
ENSBTAG00000021576	leiomodin 1 [Source:VGNC Symbol;Acc:VGNC:30938]	LMOD1	-1.52208	4.16365	0.00495471	0.06034
ENSBTAG00000000161	#NA	#NA	2.50438	-0.587791	0.00496934	0.0604626
ENSBTAG00000016455	cache domain containing 1 [Source:VGNC Symbol;Acc:VGNC:26671]	CACHD1	-1.48137	5.19149	0.00497615	0.0604899
ENSBTAG00000014806	ATPase sarcoplasmic/endoplasmic reticulum Ca2+ transporting 3 [Source:VGNC Symbol;Acc:VGNC:26292]	ATP2A3	1.46835	3.31966	0.00498805	0.060579
ENSBTAG00000043168	#NA	#NA	1.86299	-0.00409574	0.00500747	0.0607036
ENSBTAG00000019980	diacylglycerol kinase iota [Source:VGNC Symbol;Acc:VGNC:28030]	DGKI	1.90003	0.339444	0.0050065	0.0607036
ENSBTAG00000008182	FosB proto-oncogene, AP-1 transcription factor subunit [Source:VGNC Symbol;Acc:VGNC:29074]	FOSB	1.82618	1.81767	0.0050588	0.0612698
ENSBTAG00000012380	hexokinase 1 [Source:VGNC Symbol;Acc:VGNC:29864]	HK1	1.28013	8.66905	0.0051462	0.0622713
ENSBTAG00000012338	fumarylacetoacetate hydrolase [Source:VGNC Symbol;Acc:VGNC:28707]	FAH	-1.47517	3.70698	0.00521223	0.0629553
ENSBTAG00000002836	TATA-box binding protein associated factor 3 [Source:VGNC Symbol;Acc:VGNC:35574]	TAF3	1.37591	5.69991	0.0052119	0.0629553
ENSBTAG00000027809	RAB GTPase activating protein 1-like [Source:NCBI gene (formerly Entrezgene);Acc:527428]	RABGAP1L	1.46445	2.93381	0.0052176	0.0629629
ENSBTAG00000011487	pleckstrin homology domain containing S1 [Source:VGNC Symbol;Acc:VGNC:33027]	PLEKHS1	3.01137	-0.847012	0.00525136	0.0633126
ENSBTAG00000050763	2-phosphoxylose phosphatase 1 [Source:VGNC Symbol;Acc:VGNC:52811]	PXYLP1	-1.37638	4.06412	0.00526225	0.0633862
ENSBTAG00000004150	neuregulin 1 [Source:VGNC Symbol;Acc:VGNC:32261]	NRG1	1.60799	3.13275	0.00527835	0.0635224
ENSBTAG00000022819	one cut homeobox 2 [Source:VGNC Symbol;Acc:VGNC:56369]	ONECUT2	2.04426	1.46644	0.00528397	0.0635323
ENSBTAG00000002317	pleiotrophin [Source:VGNC Symbol;Acc:VGNC:33521]	PTN	-1.51534	6.27032	0.00530536	0.0637317
ENSBTAG00000004004	cold shock domain containing C2 [Source:VGNC Symbol;Acc:VGNC:27750]	CSDC2	1.82733	4.18602	0.00538475	0.0646268
ENSBTAG00000020802	dynein axonemal heavy chain 12 [Source:NCBI gene (formerly Entrezgene);Acc:100847355]	DNAH12	-1.82724	1.51884	0.00541337	0.0648527
ENSBTAG00000006686	nephronectin [Source:VGNC Symbol;Acc:VGNC:32209]	NPNT	-1.42862	4.48433	0.00540964	0.0648527
ENSBTAG00000019687	nicotinamide riboside kinase 1 [Source:VGNC Symbol;Acc:VGNC:32135]	NMRK1	-1.39834	3.52031	0.00542322	0.064912
ENSBTAG00000002600	EF-hand calcium binding domain 7 [Source:VGNC Symbol;Acc:VGNC:28347]	EFCAB7	-1.44967	3.11107	0.00546254	0.0652648
ENSBTAG00000007053	zinc finger homeobox 2 [Source:VGNC Symbol;Acc:VGNC:37156]	ZFHX2	1.36876	3.6156	0.00546184	0.0652648
ENSBTAG00000004165	citramalyl-CoA lyase [Source:VGNC Symbol;Acc:VGNC:27475]	CLYBL	-1.55605	2.84418	0.00547674	0.0653755
ENSBTAG00000043959	platelet derived growth factor C [Source:VGNC Symbol;Acc:VGNC:53915]	PDGFC	-1.53146	5.48315	0.00548237	0.0653838
ENSBTAG00000019630	ral guanine nucleotide dissociation stimulator like 1 [Source:VGNC Symbol;Acc:VGNC:33903]	RGL1	-1.46131	2.40368	0.00551774	0.0657465
ENSBTAG00000046900	gamma-glutamyltransferase 1 [Source:NCBI gene (formerly Entrezgene);Acc:615582]	GGT1	-1.75675	2.98661	0.00557532	0.0663729
ENSBTAG00000000181	sushi domain containing 3 [Source:VGNC Symbol;Acc:VGNC:35488]	SUSD3	-1.4158	3.52546	0.00560764	0.0666977
ENSBTAG00000052904	mex-3 RNA binding family member B [Source:NCBI gene (formerly Entrezgene);Acc:539904]	MEX3B	-1.68121	1.97378	0.00561695	0.0667485
ENSBTAG00000014015	phospholipase A2 group VI [Source:VGNC Symbol;Acc:VGNC:32964]	PLA2G6	-1.51823	2.46268	0.00564716	0.0670474
ENSBTAG00000012096	branched chain keto acid dehydrogenase E1 subunit beta [Source:VGNC Symbol;Acc:VGNC:97245]	BCKDHB	-1.40077	3.64922	0.00565759	0.0671111
ENSBTAG00000009337	PNMA family member 8A [Source:VGNC Symbol;Acc:VGNC:33085]	PNMA8A	-1.8383	-0.383588	0.00567288	0.0672323
ENSBTAG00000017824	interferon regulatory factor 8 [Source:VGNC Symbol;Acc:VGNC:30279]	IRF8	2.00618	0.268732	0.0056879	0.0673501
ENSBTAG00000017936	ferric chelate reductase 1 like [Source:VGNC Symbol;Acc:VGNC:29119]	FRRS1L	-1.72114	0.901843	0.00580656	0.0686937
ENSBTAG00000007065	trafficking protein particle complex 6A [Source:VGNC Symbol;Acc:VGNC:36292]	TRAPPC6A	-1.57156	2.7974	0.00581938	0.0687839
ENSBTAG00000038415	#NA	#NA	2.67634	-1.03011	0.00583494	0.0689063
ENSBTAG00000014693	transmembrane protein 88 [Source:VGNC Symbol;Acc:VGNC:36120]	TMEM88	1.53573	3.351	0.00585415	0.0690102
ENSBTAG00000052247	tubulin polymerization promoting protein [Source:NCBI gene (formerly Entrezgene);Acc:280968]	TPPP	1.58407	4.61425	0.00585179	0.0690102
ENSBTAG00000016305	ATPase 13A4 [Source:VGNC Symbol;Acc:VGNC:26280]	ATP13A4	-2.05369	-0.595498	0.0058871	0.069337
ENSBTAG00000045086	7SK RNA [Source:RFAM;Acc:RF00100]	7SK	-1.91706	-0.727033	0.00595366	0.0700586
ENSBTAG00000044065	phosphatidylinositol transfer protein cytoplasmic 1 [Source:NCBI gene (formerly Entrezgene);Acc:782067]	0	-1.6675	2.70819	0.00596834	0.0701691
ENSBTAG00000008126	nephrocystin 4 [Source:VGNC Symbol;Acc:VGNC:32203]	NPHP4	-1.33372	4.08783	0.00597554	0.0701914
ENSBTAG00000044046	sarcoglycan delta [Source:VGNC Symbol;Acc:VGNC:34537]	SGCD	-2.0665	-0.64934	0.00600834	0.0705141
ENSBTAG00000006901	nipsnap homolog 3A [Source:NCBI gene (formerly Entrezgene);Acc:534363]	NIPSNAP3A	-1.45445	3.66879	0.0060237	0.0706319
ENSBTAG00000044192	MAF bZIP transcription factor [Source:VGNC Symbol;Acc:VGNC:57051]	MAF	-1.48792	5.92541	0.00603278	0.0706758
ENSBTAG00000008550	GTPase, IMAP family member 7 [Source:NCBI gene (formerly Entrezgene);Acc:100125415]	GIMAP7	2.08492	3.91761	0.00609235	0.0713107
ENSBTAG00000010366	hypocretin receptor 1 [Source:VGNC Symbol;Acc:VGNC:29781]	HCRTR1	-1.59816	2.4973	0.00612828	0.0716679
ENSBTAG00000053007	inositol-trisphosphate 3-kinase B [Source:NCBI gene (formerly Entrezgene);Acc:540877]	ITPKB	-1.4055	4.28967	0.00615382	0.0719031
ENSBTAG00000004226	sex hormone binding globulin [Source:VGNC Symbol;Acc:VGNC:34589]	SHBG	2.24	0.415816	0.00619502	0.0723207
ENSBTAG00000051059	#NA	#NA	2.47822	1.28553	0.00620987	0.0724303
ENSBTAG00000011987	ergosterol biosynthesis 28 homolog [Source:VGNC Symbol;Acc:VGNC:55113]	ERG28	1.32165	4.47925	0.00621814	0.0724629
ENSBTAG00000051567	cyclin dependent kinase inhibitor 2B [Source:NCBI gene (formerly Entrezgene);Acc:527124]	CDKN2B	1.76083	4.63953	0.00627196	0.0730259
ENSBTAG00000009332	#NA	#NA	3.14228	-0.942163	0.00628493	0.0731127
ENSBTAG00000031590	slingshot protein phosphatase 3 [Source:VGNC Symbol;Acc:VGNC:35314]	SSH3	-1.40671	6.25919	0.00631447	0.0733919
ENSBTAG00000003496	androgen induced 1 [Source:VGNC Symbol;Acc:VGNC:25764]	AIG1	-2.33012	-0.486522	0.00638601	0.074148
ENSBTAG00000004406	musashi RNA binding protein 2 [Source:NCBI gene (formerly Entrezgene);Acc:505542]	MSI2	-1.52669	2.75229	0.00639071	0.074148
ENSBTAG00000020139	ribosomal protein L7 [Source:NCBI gene (formerly Entrezgene);Acc:514966]	RPL7	-1.79131	0.301768	0.00645681	0.0748493
ENSBTAG00000005150	high mobility group box 3 [Source:NCBI gene (formerly Entrezgene);Acc:613729]	HMGB3	-1.53145	2.20798	0.00649324	0.0752058
ENSBTAG00000003669	basonuclin 2 [Source:VGNC Symbol;Acc:VGNC:56936]	BNC2	-1.39213	4.64877	0.00654387	0.075726
ENSBTAG00000053791	#NA	#NA	2.02094	-0.588988	0.00656018	0.0758485
ENSBTAG00000012384	transcription factor EB [Source:VGNC Symbol;Acc:VGNC:35788]	TFEB	1.42704	4.15047	0.00656593	0.0758488
ENSBTAG00000014099	YTH domain containing 2 [Source:VGNC Symbol;Acc:VGNC:37040]	YTHDC2	-1.50663	4.08535	0.00661428	0.0762744
ENSBTAG00000018467	basal body orientation factor 1 [Source:VGNC Symbol;Acc:VGNC:26431]	BBOF1	2.40957	-0.166277	0.00661156	0.0762744
ENSBTAG00000006607	cyclin G1 [Source:VGNC Symbol;Acc:VGNC:26969]	CCNG1	-1.35411	6.62871	0.0066378	0.076479
ENSBTAG00000008419	#NA	#NA	1.8156	-0.333224	0.00665644	0.0766271
ENSBTAG00000021515	zinc finger DHHC-type palmitoyltransferase 19 [Source:VGNC Symbol;Acc:VGNC:37134]	ZDHHC19	2.08699	0.201731	0.00668895	0.0769346
ENSBTAG00000000983	ATP binding cassette subfamily C member 8 [Source:VGNC Symbol;Acc:VGNC:25475]	ABCC8	-3.33995	-1.33649	0.00676432	0.0776665
ENSBTAG00000001151	amyloid beta precursor like protein 1 [Source:VGNC Symbol;Acc:VGNC:26019]	APLP1	1.43795	5.61066	0.00675871	0.0776665
ENSBTAG00000046755	#NA	#NA	-1.86076	-0.217043	0.00679115	0.0778397
ENSBTAG00000026326	sialophorin [Source:VGNC Symbol;Acc:VGNC:35224]	SPN	2.73955	-0.465452	0.00678613	0.0778397
ENSBTAG00000016246	dual oxidase 1 [Source:VGNC Symbol;Acc:VGNC:28241]	DUOX1	-2.07773	-0.874503	0.00681801	0.0780801
ENSBTAG00000018469	aldehyde dehydrogenase 6 family member A1 [Source:VGNC Symbol;Acc:VGNC:25817]	ALDH6A1	-1.26327	5.28001	0.00687229	0.0786337
ENSBTAG00000020839	multiple EGF like domains 6 [Source:VGNC Symbol;Acc:VGNC:58605]	MEGF6	-1.54206	1.23309	0.0069074	0.0789672
ENSBTAG00000017571	pleckstrin homology domain containing A5 [Source:VGNC Symbol;Acc:VGNC:33007]	PLEKHA5	-1.47127	3.66472	0.00693284	0.0791898
ENSBTAG00000012228	semaphorin 4A [Source:VGNC Symbol;Acc:VGNC:34433]	SEMA4A	2.22352	2.84342	0.00697361	0.0795869
ENSBTAG00000014714	tubulin gamma complex associated protein 5 [Source:VGNC Symbol;Acc:VGNC:36515]	TUBGCP5	-1.41824	4.66318	0.00706526	0.0805634
ENSBTAG00000050454	#NA	#NA	-2.10006	-0.627608	0.00708428	0.0807109
ENSBTAG00000003531	#NA	#NA	1.90066	0.235628	0.00715649	0.0814635
ENSBTAG00000021959	cell division cycle 20B [Source:VGNC Symbol;Acc:VGNC:27061]	CDC20B	2.08351	0.880949	0.00716512	0.0814917
ENSBTAG00000000958	zinc finger SWIM-type containing 3 [Source:VGNC Symbol;Acc:VGNC:37383]	ZSWIM3	1.4823	1.79902	0.00722458	0.0820975
ENSBTAG00000045808	interleukin 17 receptor E like [Source:VGNC Symbol;Acc:VGNC:56210]	IL17REL	2.20211	0.0350967	0.00725077	0.0823246
ENSBTAG00000003152	putative ISG12(a) protein [Source:NCBI gene (formerly Entrezgene);Acc:507138]	IFI27	-2.27794	-0.665606	0.00729539	0.0827602
ENSBTAG00000026247	PKHD1 like 1 [Source:NCBI gene (formerly Entrezgene);Acc:100336824]	PKHD1L1	-1.918	0.928659	0.00731019	0.0828483
ENSBTAG00000014048	shieldin complex subunit 1 [Source:VGNC Symbol;Acc:VGNC:49170]	SHLD1	-1.79617	0.574629	0.00731566	0.0828483
ENSBTAG00000015290	BAR/IMD domain containing adaptor protein 2 like 2 [Source:VGNC Symbol;Acc:VGNC:26414]	BAIAP2L2	-2.41967	-1.00841	0.00735022	0.0831686
ENSBTAG00000007494	SWI/SNF related, matrix associated, actin dependent regulator of chromatin, subfamily a, member 2 [Source:VGNC Symbol;Acc:VGNC:34986]	SMARCA2	-1.42222	8.21303	0.00752454	0.0850684
ENSBTAG00000011124	#NA	#NA	2.5847	-1.08566	0.00761991	0.0860732
ENSBTAG00000005915	Scm like with four mbt domains 2 [Source:VGNC Symbol;Acc:VGNC:34516]	SFMBT2	-2.40115	-1.27503	0.00766333	0.0864899
ENSBTAG00000012290	sodium channel epithelial 1 subunit beta [Source:VGNC Symbol;Acc:VGNC:34356]	SCNN1B	-1.53042	4.92898	0.00767556	0.0865542
ENSBTAG00000026139	armadillo repeat containing X-linked 1 [Source:VGNC Symbol;Acc:VGNC:50546]	ARMCX1	-1.91735	-0.319283	0.00768983	0.0866413
ENSBTAG00000047709	#NA	#NA	2.95284	-1.14122	0.00770453	0.0867332
ENSBTAG00000051191	#NA	#NA	-1.71527	7.08262	0.00773114	0.086738
ENSBTAG00000020074	NTPase KAP family P-loop domain containing 1 [Source:VGNC Symbol;Acc:VGNC:32096]	NKPD1	-1.58989	0.965114	0.00772031	0.086738
ENSBTAG00000011209	synaptotagmin 11 [Source:VGNC Symbol;Acc:VGNC:35537]	SYT11	1.25618	5.95657	0.00772287	0.086738
ENSBTAG00000008121	R-spondin 3 [Source:NCBI gene (formerly Entrezgene);Acc:534650]	RSPO3	1.56803	4.51262	0.007729	0.086738
ENSBTAG00000009965	enoyl-CoA delta isomerase 1 [Source:VGNC Symbol;Acc:VGNC:28309]	ECI1	1.6356	5.09387	0.00777409	0.0871461
ENSBTAG00000017946	family with sequence similarity 25 member A [Source:NCBI gene (formerly Entrezgene);Acc:781772]	0	-1.56258	2.44298	0.0078343	0.0877468
ENSBTAG00000020538	HECT and RLD domain containing E3 ubiquitin protein ligase 5 [Source:VGNC Symbol;Acc:VGNC:29814]	HERC5	1.3448	3.98144	0.00784914	0.0878388
ENSBTAG00000007428	cyclin dependent kinase like 5 [Source:VGNC Symbol;Acc:VGNC:56922]	CDKL5	-2.05074	-1.18221	0.00789604	0.088289
ENSBTAG00000020826	cysteine rich hydrophobic domain 1 [Source:VGNC Symbol;Acc:VGNC:27292]	CHIC1	-1.65444	-0.0887074	0.00792035	0.0884862
ENSBTAG00000017268	protein interacting with cyclin A1 [Source:VGNC Symbol;Acc:VGNC:33358]	PROCA1	1.49629	2.88993	0.00794412	0.088677
ENSBTAG00000015904	#NA	#NA	3.85845	-0.948868	0.00806056	0.089901
ENSBTAG00000013227	snail family transcriptional repressor 2 [Source:VGNC Symbol;Acc:VGNC:35048]	SNAI2	-1.41153	5.74989	0.00810827	0.0903571
ENSBTAG00000016211	glutaryl-CoA dehydrogenase [Source:VGNC Symbol;Acc:VGNC:29282]	GCDH	-1.28364	4.4042	0.00813069	0.0905308
ENSBTAG00000009109	CAS1 domain containing 1 [Source:VGNC Symbol;Acc:VGNC:26775]	CASD1	-1.38082	3.57024	0.0081908	0.0911235
ENSBTAG00000050754	#NA	#NA	2.39306	-0.887506	0.00823164	0.091501
ENSBTAG00000008063	peroxisome proliferator activated receptor alpha [Source:VGNC Symbol;Acc:VGNC:33181]	PPARA	-1.36875	3.03805	0.00827442	0.0918995
ENSBTAG00000019097	contactin associated protein 1 [Source:VGNC Symbol;Acc:VGNC:27540]	CNTNAP1	-1.35105	5.16647	0.00829272	0.0920256
ENSBTAG00000005850	delta like non-canonical Notch ligand 2 [Source:VGNC Symbol;Acc:VGNC:28093]	DLK2	-1.60104	1.974	0.00831477	0.092193
ENSBTAG00000045711	cysteine rich tail 1 [Source:VGNC Symbol;Acc:VGNC:50272]	CYSRT1	2.10887	2.34065	0.00834312	0.09243
ENSBTAG00000012854	gasdermin B [Source:VGNC Symbol;Acc:VGNC:29673]	GSDMB	-1.73204	2.61792	0.00839835	0.0929642
ENSBTAG00000037533	complement component 4A [Source:NCBI gene (formerly Entrezgene);Acc:280678]	C4A	-1.76955	1.68227	0.00845632	0.0934497
ENSBTAG00000050149	#NA	#NA	1.88316	-0.0346281	0.00845149	0.0934497
ENSBTAG00000001093	kelch like family member 23 [Source:VGNC Symbol;Acc:VGNC:56126]	KLHL23	-1.50015	3.33555	0.0084714	0.0935384
ENSBTAG00000011871	B and T lymphocyte associated [Source:VGNC Symbol;Acc:VGNC:26602]	BTLA	5.09085	-1.08532	0.00853448	0.0941564
ENSBTAG00000048416	SPEM family member 2 [Source:NCBI gene (formerly Entrezgene);Acc:112442631]	SPEM2	2.70936	-0.971899	0.00859207	0.0947129
ENSBTAG00000053347	#NA	#NA	1.71092	1.53555	0.00861674	0.0949059
ENSBTAG00000002908	G protein subunit gamma 4 [Source:VGNC Symbol;Acc:VGNC:29467]	GNG4	-1.92836	-0.79627	0.0086639	0.0953461
ENSBTAG00000046407	nyctalopin [Source:VGNC Symbol;Acc:VGNC:32388]	NYX	-2.02496	-1.02361	0.00867803	0.0954223
ENSBTAG00000019716	C-X-C motif chemokine ligand 8 [Source:VGNC Symbol;Acc:VGNC:27853]	CXCL8	1.87072	6.45703	0.00872491	0.0958583
ENSBTAG00000019054	epithelial stromal interaction 1 [Source:VGNC Symbol;Acc:VGNC:28557]	EPSTI1	-1.74611	3.05561	0.00876507	0.0961789
ENSBTAG00000020374	thrombospondin type 1 domain containing 1 [Source:VGNC Symbol;Acc:VGNC:35849]	THSD1	1.50312	6.32993	0.00876862	0.0961789
ENSBTAG00000050992	cornichon family AMPA receptor auxiliary protein 2 [Source:NCBI gene (formerly Entrezgene);Acc:618106]	CNIH2	-1.66767	1.31245	0.00878258	0.0962525
ENSBTAG00000000078	GLI pathogenesis related 2 [Source:VGNC Symbol;Acc:VGNC:29405]	GLIPR2	-1.37439	6.06966	0.00883121	0.0967054
ENSBTAG00000004484	centrosomal protein 83 [Source:VGNC Symbol;Acc:VGNC:27215]	CEP83	-1.52333	4.67522	0.00887095	0.0970604
ENSBTAG00000012848	protein tyrosine phosphatase receptor type U [Source:VGNC Symbol;Acc:VGNC:33559]	PTPRU	-1.7834	3.69717	0.00889311	0.0972225
ENSBTAG00000006939	FYVE, RhoGEF and PH domain containing 3 [Source:VGNC Symbol;Acc:VGNC:28966]	FGD3	1.73617	0.550593	0.00890466	0.0972685
ENSBTAG00000011659	phosphatidylinositol glycan anchor biosynthesis class Z [Source:VGNC Symbol;Acc:VGNC:32882]	PIGZ	1.63423	2.30476	0.00898938	0.0981131
ENSBTAG00000039195	NHS actin remodeling regulator [Source:VGNC Symbol;Acc:VGNC:32071]	NHS	-2.03418	-1.11989	0.00902236	0.0983541
ENSBTAG00000037452	purine nucleoside phosphorylase [Source:NCBI gene (formerly Entrezgene);Acc:790312]	0	-1.40281	5.67714	0.0090263	0.0983541
ENSBTAG00000015209	MAX dimerization protein 4 [Source:VGNC Symbol;Acc:VGNC:31772]	MXD4	-1.53467	5.09514	0.00905015	0.0985328
ENSBTAG00000018833	SV2 related protein [Source:VGNC Symbol;Acc:VGNC:35498]	SVOP	-2.43585	-0.666633	0.00913183	0.0993405
ENSBTAG00000000987	otogelin [Source:VGNC Symbol;Acc:VGNC:32485]	OTOG	1.78203	3.98788	0.00915794	0.0995428
ENSBTAG00000000015	FAD dependent oxidoreductase domain containing 2 [Source:VGNC Symbol;Acc:VGNC:29107]	FOXRED2	1.33919	4.68447	0.00923122	0.100257
ENSBTAG00000053919	putative protein T-ENOL [Source:NCBI gene (formerly Entrezgene);Acc:112444288]	0	1.42548	2.35022	0.00929022	0.100815
ENSBTAG00000011411	#NA	#NA	2.37293	-1.00318	0.00932135	0.10107
ENSBTAG00000018920	tripartite motif containing 47 [Source:VGNC Symbol;Acc:VGNC:36339]	TRIM47	1.36248	4.31661	0.00937297	0.101547
ENSBTAG00000047078	neurotrophin 4 [Source:VGNC Symbol;Acc:VGNC:32300]	NTF4	-1.58229	0.382018	0.00944289	0.102221
ENSBTAG00000004078	potassium voltage-gated channel subfamily H member 2 [Source:VGNC Symbol;Acc:VGNC:96697]	KCNH2	1.37642	4.55096	0.00962902	0.104151
ENSBTAG00000003749	potassium calcium-activated channel subfamily M regulatory beta subunit 4 [Source:VGNC Symbol;Acc:VGNC:30482]	KCNMB4	-1.82238	-0.394542	0.00969163	0.104742
ENSBTAG00000000042	pyrroline-5-carboxylate reductase 1 [Source:VGNC Symbol;Acc:VGNC:33586]	PYCR1	-1.5227	6.26006	0.00973974	0.105177
ENSBTAG00000005244	RAS like family 11 member A [Source:VGNC Symbol;Acc:VGNC:33754]	RASL11A	-1.70966	1.58709	0.00978085	0.105534
ENSBTAG00000002737	WAP, follistatin/kazal, immunoglobulin, kunitz and netrin domain containing 1 [Source:VGNC Symbol;Acc:VGNC:36935]	WFIKKN1	2.17504	0.998225	0.00982241	0.105897
ENSBTAG00000015012	peptidyl-tRNA hydrolase domain containing 1 [Source:VGNC Symbol;Acc:VGNC:33563]	PTRHD1	-1.42695	3.11555	0.00987725	0.106401
ENSBTAG00000005466	chromosome 8 C8orf58 homolog [Source:NCBI gene (formerly Entrezgene);Acc:101902190]	0	1.78306	0.476763	0.00990738	0.106605
ENSBTAG00000015926	#NA	#NA	1.9692	-0.387794	0.00991225	0.106605
ENSBTAG00000016048	carnitine palmitoyltransferase 1B [Source:VGNC Symbol;Acc:VGNC:27677]	CPT1B	-1.90021	1.84079	0.0099384	0.106698
ENSBTAG00000006262	LIM zinc finger domain containing 2 [Source:VGNC Symbol;Acc:VGNC:30891]	LIMS2	1.35434	5.67304	0.00994502	0.106698
ENSBTAG00000021751	#NA	#NA	2.02877	-0.744405	0.00993182	0.106698
ENSBTAG00000000082	potassium inwardly rectifying channel subfamily J member 14 [Source:VGNC Symbol;Acc:VGNC:30457]	KCNJ14	2.57646	-0.56565	0.00997981	0.106984
ENSBTAG00000003809	phospholipase C delta 4 [Source:VGNC Symbol;Acc:VGNC:32986]	PLCD4	-2.1092	-0.330699	0.0100033	0.107149
ENSBTAG00000019168	paired like homeobox 2A [Source:VGNC Symbol;Acc:VGNC:32844]	PHOX2A	1.71342	1.47828	0.0100183	0.107224
ENSBTAG00000020061	#NA	#NA	2.16356	-0.42673	0.0100294	0.107256
ENSBTAG00000016094	solute carrier family 36 member 1 [Source:VGNC Symbol;Acc:VGNC:34838]	SLC36A1	1.29303	4.51064	0.0100579	0.107474
ENSBTAG00000050478	#NA	#NA	-2.11531	-0.764524	0.010092	0.107659
ENSBTAG00000021422	PDZ domain containing 4 [Source:VGNC Symbol;Acc:VGNC:32727]	PDZD4	-1.99638	-0.120463	0.0101077	0.107659
ENSBTAG00000008102	cartilage acidic protein 1 [Source:VGNC Symbol;Acc:VGNC:27725]	CRTAC1	-1.46629	3.99437	0.0100885	0.107659
ENSBTAG00000031544	DNA damage inducible transcript 3 [Source:VGNC Symbol;Acc:VGNC:27947]	DDIT3	1.37889	5.82392	0.0101007	0.107659
ENSBTAG00000010935	EMAP like 4 [Source:VGNC Symbol;Acc:VGNC:28478]	EML4	-1.50684	6.2281	0.0101694	0.108229
ENSBTAG00000007816	#NA	#NA	-1.43683	2.48843	0.0102018	0.108486
ENSBTAG00000014064	fibroblast growth factor receptor 2 [Source:VGNC Symbol;Acc:VGNC:28987]	FGFR2	-1.24673	5.2917	0.0102122	0.10851
ENSBTAG00000001246	ATPase Na+/K+ transporting subunit alpha 1 [Source:VGNC Symbol;Acc:VGNC:26282]	ATP1A1	-1.22886	9.53938	0.0102561	0.108889
ENSBTAG00000004899	actin binding LIM protein 1 [Source:VGNC Symbol;Acc:VGNC:55931]	ABLIM1	-1.28136	4.028	0.010276	0.109013
ENSBTAG00000039708	apical junction component 1 homolog [Source:VGNC Symbol;Acc:VGNC:49537]	AJM1	2.07038	2.85111	0.0103153	0.109342
ENSBTAG00000013391	ANKH inorganic pyrophosphate transport regulator [Source:VGNC Symbol;Acc:VGNC:25901]	ANKH	-1.25563	6.91536	0.0103676	0.109809
ENSBTAG00000009190	solute carrier family 2 member 4 [Source:VGNC Symbol;Acc:VGNC:34801]	SLC2A4	1.85452	1.55555	0.0103836	0.10989
ENSBTAG00000019748	transcription activation suppressor [Source:VGNC Symbol;Acc:VGNC:28783]	TASOR	-1.383	7.81797	0.0104281	0.110273
ENSBTAG00000020589	ectonucleoside triphosphate diphosphohydrolase 1 [Source:VGNC Symbol;Acc:VGNC:97269]	ENTPD1	-1.79488	0.961781	0.0104683	0.11061
ENSBTAG00000010978	prospero homeobox 1 [Source:VGNC Symbol;Acc:VGNC:33369]	PROX1	2.14408	0.604145	0.0105167	0.111033
ENSBTAG00000002115	chromosome 13 C20orf96 homolog [Source:VGNC Symbol;Acc:VGNC:49173]	C13H20orf96	-1.43068	1.5433	0.0105674	0.111396
ENSBTAG00000012012	cytochrome b5 type A [Source:VGNC Symbol;Acc:VGNC:50260]	CYB5A	-1.31397	6.5084	0.0105679	0.111396
ENSBTAG00000021158	SATB homeobox 1 [Source:VGNC Symbol;Acc:VGNC:34298]	SATB1	-1.43835	1.38832	0.010612	0.111772
ENSBTAG00000001244	plasminogen activator, tissue type [Source:VGNC Symbol;Acc:VGNC:32974]	PLAT	-1.43541	9.06745	0.010644	0.11202
ENSBTAG00000020616	diacylglycerol kinase delta [Source:VGNC Symbol;Acc:VGNC:28026]	DGKD	1.25338	6.58022	0.0106945	0.112462
ENSBTAG00000017536	membrane palmitoylated protein 3 [Source:VGNC Symbol;Acc:VGNC:55850]	MPP3	1.9351	0.413173	0.0107149	0.112587
ENSBTAG00000007681	dihydrofolate reductase [Source:NCBI gene (formerly Entrezgene);Acc:508809]	DHFR	-1.31447	5.95485	0.0107797	0.113178
ENSBTAG00000049074	#NA	#NA	2.15283	-0.514588	0.0108045	0.113349
ENSBTAG00000033679	holocarboxylase synthetase [Source:VGNC Symbol;Acc:VGNC:50274]	HLCS	-1.29227	2.98141	0.0108416	0.1136
ENSBTAG00000018198	#NA	#NA	2.2222	-0.63011	0.0108456	0.1136
ENSBTAG00000018321	polyamine oxidase [Source:VGNC Symbol;Acc:VGNC:32570]	PAOX	-1.6153	4.70806	0.0108933	0.11392
ENSBTAG00000002065	transcription factor AP-2 gamma [Source:VGNC Symbol;Acc:VGNC:35778]	TFAP2C	3.00354	-0.73116	0.0108885	0.11392
ENSBTAG00000012954	ES cell expressed Ras [Source:VGNC Symbol;Acc:VGNC:28562]	ERAS	-1.6511	1.28243	0.0109303	0.114216
ENSBTAG00000018206	NIPA like domain containing 2 [Source:VGNC Symbol;Acc:VGNC:32082]	NIPAL2	-1.45387	3.00276	0.0109463	0.114224
ENSBTAG00000003955	#NA	#NA	2.19923	-0.574171	0.0109483	0.114224
ENSBTAG00000050801	#NA	#NA	-1.59851	1.0115	0.0109797	0.114462
ENSBTAG00000001607	transmembrane protein 41B [Source:VGNC Symbol;Acc:VGNC:36086]	TMEM41B	1.22041	7.21739	0.0110933	0.115555
ENSBTAG00000012855	lipoprotein lipase [Source:VGNC Symbol;Acc:VGNC:30969]	LPL	1.62337	3.52632	0.0111298	0.115845
ENSBTAG00000006080	microtubule associated serine/threonine kinase 1 [Source:VGNC Symbol;Acc:VGNC:31257]	MAST1	1.65218	2.98051	0.0112588	0.117095
ENSBTAG00000012434	ecto-NOX disulfide-thiol exchanger 1 [Source:VGNC Symbol;Acc:VGNC:28502]	ENOX1	-1.47795	4.28074	0.0113918	0.118107
ENSBTAG00000021829	GM2 ganglioside activator [Source:VGNC Symbol;Acc:VGNC:29431]	GM2A	-1.46544	1.87574	0.0113706	0.118107
ENSBTAG00000020895	lysyl oxidase like 4 [Source:VGNC Symbol;Acc:VGNC:55958]	LOXL4	1.70417	1.29346	0.0113771	0.118107
ENSBTAG00000053135	#NA	#NA	1.82732	-0.236839	0.0113834	0.118107
ENSBTAG00000015106	desmoplakin [Source:VGNC Symbol;Acc:VGNC:28225]	DSP	-1.2306	9.1266	0.0114779	0.118907
ENSBTAG00000048086	#NA	#NA	2.40965	-1.31972	0.0115057	0.119102
ENSBTAG00000047299	DiGeorge syndrome critical region gene 6 like [Source:NCBI gene (formerly Entrezgene);Acc:100126445]	DGCR6L	-1.35372	5.45867	0.0115514	0.119388
ENSBTAG00000016721	#NA	#NA	2.74491	-0.927892	0.0115455	0.119388
ENSBTAG00000021999	carnitine palmitoyltransferase 1A [Source:VGNC Symbol;Acc:VGNC:27676]	CPT1A	-1.50247	6.66691	0.0115965	0.119761
ENSBTAG00000004597	Pim-2 proto-oncogene, serine/threonine kinase [Source:VGNC Symbol;Acc:VGNC:32900]	PIM2	1.42664	3.14408	0.0117873	0.121637
ENSBTAG00000006560	VANGL planar cell polarity protein 2 [Source:VGNC Symbol;Acc:VGNC:36762]	VANGL2	-1.62039	1.42535	0.0118355	0.12204
ENSBTAG00000052472	#NA	#NA	-1.30235	3.0464	0.0118493	0.122087
ENSBTAG00000001301	leucine rich repeat containing 32 [Source:VGNC Symbol;Acc:VGNC:54884]	LRRC32	-1.82123	-0.254239	0.011862	0.122122
ENSBTAG00000001102	serpin family B member 10 [Source:VGNC Symbol;Acc:VGNC:56372]	SERPINB10	1.73785	4.94828	0.0118749	0.122161
ENSBTAG00000019049	apoptosis associated tyrosine kinase [Source:VGNC Symbol;Acc:VGNC:25453]	AATK	-2.22052	-0.854836	0.0118977	0.122205
ENSBTAG00000049285	TNF receptor superfamily member 17 [Source:NCBI gene (formerly Entrezgene);Acc:784268]	TNFRSF17	-1.9356	-1.11063	0.0118954	0.122205
ENSBTAG00000039974	somatostatin receptor 5 [Source:VGNC Symbol;Acc:VGNC:35328]	SSTR5	-2.12556	-0.876623	0.0119197	0.122336
ENSBTAG00000004510	sarcosine dehydrogenase [Source:VGNC Symbol;Acc:VGNC:34289]	SARDH	-1.74449	5.75807	0.0119329	0.122377
ENSBTAG00000010731	cyclin dependent kinase inhibitor 2D [Source:VGNC Symbol;Acc:VGNC:27147]	CDKN2D	1.42239	3.33776	0.0120709	0.123696
ENSBTAG00000054057	neuregulin 1 [Source:NCBI gene (formerly Entrezgene);Acc:281361]	NRG1	1.53342	2.38513	0.0120883	0.123778
ENSBTAG00000044023	cyclin dependent kinase 6 [Source:VGNC Symbol;Acc:VGNC:27133]	CDK6	1.38764	3.28571	0.0122302	0.125039
ENSBTAG00000054465	#NA	#NA	2.15303	-0.733439	0.0122253	0.125039
ENSBTAG00000043568	NADH dehydrogenase subunit 3 [Source:NCBI gene (formerly Entrezgene);Acc:3283884]	ND3	-1.65179	8.82882	0.0122496	0.125141
ENSBTAG00000015596	solute carrier organic anion transporter family member 2B1 [Source:VGNC Symbol;Acc:VGNC:34952]	SLCO2B1	-1.63603	2.57823	0.0122702	0.125158
ENSBTAG00000051245	SRY-box transcription factor 4 [Source:VGNC Symbol;Acc:VGNC:54491]	SOX4	-1.48573	4.59715	0.0122696	0.125158
ENSBTAG00000010060	solute carrier family 43 member 3 [Source:VGNC Symbol;Acc:VGNC:54892]	SLC43A3	-1.32711	5.16572	0.0123146	0.125514
ENSBTAG00000015810	chromosome 15 open reading frame, human C11orf34 [Source:NCBI gene (formerly Entrezgene);Acc:505518]	C15H11orf34	-1.38446	4.60491	0.0123384	0.12566
ENSBTAG00000007741	cytokine receptor like factor 1 [Source:VGNC Symbol;Acc:VGNC:27717]	CRLF1	-1.45237	2.02608	0.0123509	0.125691
ENSBTAG00000006434	synaptopodin 2 [Source:VGNC Symbol;Acc:VGNC:35531]	SYNPO2	-1.45209	5.3321	0.0124641	0.126746
ENSBTAG00000012058	GDP-mannose 4,6-dehydratase [Source:VGNC Symbol;Acc:VGNC:55901]	GMDS	-1.39974	3.33786	0.0126241	0.128248
ENSBTAG00000014982	chromosome 7 C19orf71 homolog [Source:NCBI gene (formerly Entrezgene);Acc:768023]	C7H19orf71	1.81952	-0.251802	0.0126312	0.128248
ENSBTAG00000021103	solute carrier family 35 member F5 [Source:VGNC Symbol;Acc:VGNC:34835]	SLC35F5	-1.20605	4.98782	0.0126708	0.128551
ENSBTAG00000011374	#NA	#NA	3.1539	-0.726918	0.012749	0.129246
ENSBTAG00000020689	protein phosphatase 1 regulatory subunit 13 like [Source:VGNC Symbol;Acc:VGNC:33225]	PPP1R13L	1.55371	6.44753	0.0127929	0.129592
ENSBTAG00000020887	calcium voltage-gated channel subunit alpha1 E [Source:VGNC Symbol;Acc:VGNC:26675]	CACNA1E	-1.92866	-0.786248	0.01288	0.130375
ENSBTAG00000005293	cell division cycle 25C [Source:VGNC Symbol;Acc:VGNC:27064]	CDC25C	1.2743	5.08249	0.0129574	0.131058
ENSBTAG00000031548	#NA	#NA	2.13871	-0.052399	0.012992	0.131307
ENSBTAG00000020676	matrix metallopeptidase 9 [Source:VGNC Symbol;Acc:VGNC:31531]	MMP9	3.06094	-0.551526	0.0130082	0.131371
ENSBTAG00000032567	complement C1q like 4 [Source:NCBI gene (formerly Entrezgene);Acc:112446679]	C1QL4	1.89388	2.11967	0.0130339	0.13153
ENSBTAG00000039671	#NA	#NA	-2.3632	-0.617494	0.0130883	0.131978
ENSBTAG00000001835	gap junction protein alpha 1 [Source:VGNC Symbol;Acc:VGNC:29370]	GJA1	-1.28512	8.21812	0.0131145	0.132094
ENSBTAG00000002508	G protein subunit gamma 3 [Source:VGNC Symbol;Acc:VGNC:29466]	GNG3	1.45973	1.62146	0.0131197	0.132094
ENSBTAG00000014601	sarcoglycan beta [Source:VGNC Symbol;Acc:VGNC:34536]	SGCB	-1.35193	5.90966	0.0131602	0.132401
ENSBTAG00000025146	#NA	#NA	1.73536	1.41237	0.0132231	0.132933
ENSBTAG00000004876	RAB, member of RAS oncogene family like 2B [Source:NCBI gene (formerly Entrezgene);Acc:515671]	RABL2B	-1.22682	5.97182	0.013278	0.133384
ENSBTAG00000047772	F-box protein 48 [Source:VGNC Symbol;Acc:VGNC:58598]	FBXO48	1.80182	1.33811	0.0133029	0.133533
ENSBTAG00000008373	integrin subunit alpha 10 [Source:VGNC Symbol;Acc:VGNC:30311]	ITGA10	-1.35703	3.7336	0.0133198	0.133601
ENSBTAG00000012805	tetraspanin 13 [Source:VGNC Symbol;Acc:VGNC:36428]	TSPAN13	1.30375	6.55293	0.0133523	0.133826
ENSBTAG00000043565	#NA	#NA	-2.08108	0.0357683	0.0133922	0.134125
ENSBTAG00000005714	actin alpha cardiac muscle 1 [Source:VGNC Symbol;Acc:VGNC:25574]	ACTC1	1.44252	1.14414	0.0134391	0.134493
ENSBTAG00000011456	5'-nucleotidase, cytosolic IIIB [Source:VGNC Symbol;Acc:VGNC:32293]	NT5C3B	-1.42531	5.50687	0.0134698	0.134495
ENSBTAG00000017239	gamma-aminobutyric acid type B receptor subunit 1 [Source:VGNC Symbol;Acc:VGNC:29187]	GABBR1	-1.30267	5.15487	0.0134645	0.134495
ENSBTAG00000014249	influenza virus NS1A binding protein [Source:NCBI gene (formerly Entrezgene);Acc:514940]	IVNS1ABP	-1.28518	7.43723	0.0134552	0.134495
ENSBTAG00000026309	zinc fingers and homeoboxes 2 [Source:VGNC Symbol;Acc:VGNC:37183]	ZHX2	-1.46147	1.75598	0.0135427	0.135121
ENSBTAG00000018543	#NA	#NA	3.69771	-1.16383	0.0135685	0.135276
ENSBTAG00000039337	docosahexaenoic acid omega-hydroxylase CYP4F3 [Source:NCBI gene (formerly Entrezgene);Acc:100295883]	0	1.71271	1.2592	0.0136882	0.136368
ENSBTAG00000011597	PDS5 cohesin associated factor B [Source:VGNC Symbol;Acc:VGNC:32718]	PDS5B	-1.53497	5.98644	0.0137521	0.136901
ENSBTAG00000018071	tropomodulin 4 [Source:VGNC Symbol;Acc:VGNC:36137]	TMOD4	-1.76948	-0.0772856	0.0137749	0.136984
ENSBTAG00000014465	serpin family E member 1 [Source:VGNC Symbol;Acc:VGNC:34476]	SERPINE1	-1.41562	9.72149	0.0137811	0.136984
ENSBTAG00000014402	GTPase, IMAP family member 8 [Source:VGNC Symbol;Acc:VGNC:29357]	GIMAP8	1.49977	5.20254	0.0138103	0.137171
ENSBTAG00000010913	sulfiredoxin 1 [Source:VGNC Symbol;Acc:VGNC:35304]	SRXN1	1.67459	4.12449	0.0139215	0.138172
ENSBTAG00000053343	#NA	#NA	3.97134	-1.37428	0.0139725	0.138575
ENSBTAG00000021923	desmoglein 2 [Source:VGNC Symbol;Acc:VGNC:28221]	DSG2	-1.39914	8.31082	0.0140862	0.139517
ENSBTAG00000012106	aarF domain containing kinase 1 [Source:VGNC Symbol;Acc:VGNC:25639]	ADCK1	-1.33581	2.47158	0.0140886	0.139517
ENSBTAG00000045994	adrenoceptor alpha 2C [Source:NCBI gene (formerly Entrezgene);Acc:407139]	ADRA2C	2.53289	-0.630905	0.014106	0.139585
ENSBTAG00000053202	#NA	#NA	2.24215	-0.720219	0.0141416	0.139833
ENSBTAG00000001231	cadherin related family member 1 [Source:VGNC Symbol;Acc:VGNC:27108]	CDHR1	1.6826	2.5318	0.0142482	0.140782
ENSBTAG00000000436	TNF alpha induced protein 3 [Source:VGNC Symbol;Acc:VGNC:36155]	TNFAIP3	1.36397	4.85945	0.0143657	0.141837
ENSBTAG00000006747	latent transforming growth factor beta binding protein 3 [Source:VGNC Symbol;Acc:VGNC:31073]	LTBP3	-1.31381	7.00887	0.0144427	0.142492
ENSBTAG00000048908	#NA	#NA	-1.38079	1.88148	0.0145205	0.14294
ENSBTAG00000013745	integrin subunit alpha 5 [Source:VGNC Symbol;Acc:VGNC:30317]	ITGA5	1.31129	8.68684	0.0145153	0.14294
ENSBTAG00000008384	#NA	#NA	2.46312	-1.19395	0.0145022	0.14294
ENSBTAG00000016663	phosphatidylinositol glycan anchor biosynthesis class N [Source:VGNC Symbol;Acc:VGNC:32873]	PIGN	-1.35744	4.85027	0.0145754	0.143373
ENSBTAG00000052956	#NA	#NA	-1.42231	3.54783	0.0146095	0.143602
ENSBTAG00000021326	C-C motif chemokine ligand 20 [Source:VGNC Symbol;Acc:VGNC:26947]	CCL20	3.88602	0.494661	0.0146772	0.144161
ENSBTAG00000012397	deoxycytidine kinase [Source:VGNC Symbol;Acc:VGNC:27914]	DCK	1.53107	6.35815	0.0147952	0.145212
ENSBTAG00000006589	CF transmembrane conductance regulator [Source:VGNC Symbol;Acc:VGNC:50053]	CFTR	-1.56036	0.422329	0.014828	0.145426
ENSBTAG00000040329	#NA	#NA	2.16991	-1.05853	0.0149249	0.146268
ENSBTAG00000020028	retinol binding protein 1 [Source:VGNC Symbol;Acc:VGNC:33812]	RBP1	-1.65187	2.95741	0.0149457	0.146364
ENSBTAG00000019478	N-acylethanolamine acid amidase [Source:VGNC Symbol;Acc:VGNC:31854]	NAAA	-1.46174	2.59305	0.0149942	0.146731
ENSBTAG00000005305	neurotensin [Source:VGNC Symbol;Acc:VGNC:32311]	NTS	1.36694	7.16394	0.0150065	0.146743
ENSBTAG00000016723	growth factor independent 1 transcriptional repressor [Source:VGNC Symbol;Acc:VGNC:29325]	GFI1	2.64213	-0.944811	0.0150217	0.146783
ENSBTAG00000047997	phosphoribosyl pyrophosphate synthetase 2 [Source:VGNC Symbol;Acc:VGNC:56950]	PRPS2	-1.22986	4.14201	0.015145	0.147879
ENSBTAG00000054469	solute carrier family 25 member 53 [Source:NCBI gene (formerly Entrezgene);Acc:786529]	SLC25A53	-1.62244	0.0260829	0.0152	0.148307
ENSBTAG00000000995	terminal nucleotidyltransferase 5A [Source:VGNC Symbol;Acc:VGNC:28815]	TENT5A	-1.41068	2.38298	0.0152858	0.149034
ENSBTAG00000008993	integrator complex subunit 6 like [Source:NCBI gene (formerly Entrezgene);Acc:540312]	0	-1.84737	-0.406559	0.0153498	0.149547
ENSBTAG00000016432	phosphatidylethanolamine N-methyltransferase [Source:VGNC Symbol;Acc:VGNC:32745]	PEMT	-1.49704	1.26584	0.0153905	0.149724
ENSBTAG00000004840	complement C1s [Source:VGNC Symbol;Acc:VGNC:26630]	C1S	-1.38856	5.23289	0.0153841	0.149724
ENSBTAG00000004542	#NA	#NA	2.21081	-0.613049	0.015428	0.149979
ENSBTAG00000007417	growth differentiation factor 11 [Source:VGNC Symbol;Acc:VGNC:29300]	GDF11	1.37286	2.64375	0.0154701	0.150278
ENSBTAG00000002464	phospholipase C eta 2 [Source:VGNC Symbol;Acc:VGNC:32991]	PLCH2	-1.64872	5.35932	0.015531	0.15073
ENSBTAG00000048468	#NA	#NA	1.86235	-0.206972	0.0155394	0.15073
ENSBTAG00000004855	peroxiredoxin 6 [Source:VGNC Symbol;Acc:VGNC:33304]	PRDX6	-1.28992	8.45947	0.0156378	0.151491
ENSBTAG00000052791	JunD proto-oncogene, AP-1 transcription factor subunit [Source:NCBI gene (formerly Entrezgene);Acc:517192]	JUND	1.32632	7.55579	0.0156408	0.151491
ENSBTAG00000048481	#NA	#NA	1.79517	-0.621661	0.0157428	0.152368
ENSBTAG00000013832	tRNA isopentenyltransferase 1 [Source:VGNC Symbol;Acc:VGNC:36363]	TRIT1	1.19529	5.58047	0.0158248	0.152959
ENSBTAG00000012059	mevalonate diphosphate decarboxylase [Source:VGNC Symbol;Acc:VGNC:31767]	MVD	1.60283	6.07872	0.0158269	0.152959
ENSBTAG00000009945	BRICHOS domain containing 5 [Source:VGNC Symbol;Acc:VGNC:26566]	BRICD5	-1.74651	0.532105	0.0158888	0.153445
ENSBTAG00000001647	pleckstrin homology domain containing J1 [Source:VGNC Symbol;Acc:VGNC:33023]	PLEKHJ1	-1.53397	4.48914	0.0160294	0.154593
ENSBTAG00000003111	ATM serine/threonine kinase [Source:VGNC Symbol;Acc:VGNC:26268]	ATM	-1.42341	5.60976	0.016031	0.154593
ENSBTAG00000010136	cytidine monophosphate N-acetylneuraminic acid synthetase [Source:VGNC Symbol;Acc:VGNC:27476]	CMAS	-1.40159	5.19363	0.0162084	0.155968
ENSBTAG00000018528	ubiquitin specific peptidase 45 [Source:VGNC Symbol;Acc:VGNC:52846]	USP45	1.30348	4.41034	0.0162089	0.155968
ENSBTAG00000053905	#NA	#NA	1.63066	0.895535	0.0161977	0.155968
ENSBTAG00000004256	ornithine decarboxylase 1 [Source:NCBI gene (formerly Entrezgene);Acc:281365]	ODC1	1.23963	7.76934	0.0163897	0.157593
ENSBTAG00000008084	zinc finger protein 382 [Source:VGNC Symbol;Acc:VGNC:37261]	ZNF382	1.57368	2.47156	0.0165066	0.158602
ENSBTAG00000032477	HECT domain E3 ubiquitin protein ligase 1 [Source:VGNC Symbol;Acc:VGNC:29800]	HECTD1	-1.3399	7.96298	0.01656	0.159
ENSBTAG00000010238	leukotriene B4 receptor [Source:VGNC Symbol;Acc:VGNC:31069]	LTB4R	1.75975	4.12913	0.0165983	0.159253
ENSBTAG00000003781	MPL proto-oncogene, thrombopoietin receptor [Source:VGNC Symbol;Acc:VGNC:31578]	MPL	1.62763	1.57207	0.0166147	0.159295
ENSBTAG00000011283	recombination signal binding protein for immunoglobulin kappa J region like [Source:VGNC Symbol;Acc:VGNC:57020]	RBPJL	-1.71096	-0.428934	0.0166427	0.159342
ENSBTAG00000007646	phosphatidylinositol glycan anchor biosynthesis class A [Source:VGNC Symbol;Acc:VGNC:32867]	PIGA	-1.36591	3.75453	0.0166437	0.159342
ENSBTAG00000004135	lemur tyrosine kinase 2 [Source:VGNC Symbol;Acc:VGNC:30941]	LMTK2	1.28052	7.83096	0.0167085	0.159847
ENSBTAG00000016109	dehydrogenase/reductase 12 [Source:VGNC Symbol;Acc:VGNC:28041]	DHRS12	-1.34527	1.97255	0.0167779	0.160395
ENSBTAG00000015375	SH2 domain containing 3C [Source:VGNC Symbol;Acc:VGNC:34559]	SH2D3C	1.58159	0.90455	0.0169671	0.162016
ENSBTAG00000011738	transferrin receptor 2 [Source:VGNC Symbol;Acc:VGNC:35796]	TFR2	1.74836	0.629946	0.016972	0.162016
ENSBTAG00000012357	vacuolar protein sorting 13 homolog B [Source:NCBI gene (formerly Entrezgene);Acc:512656]	VPS13B	-1.26136	5.56295	0.0170782	0.162913
ENSBTAG00000049111	#NA	#NA	-1.6489	-0.869118	0.0170911	0.162918
ENSBTAG00000011337	#NA	#NA	1.92851	-0.875668	0.0171217	0.163093
ENSBTAG00000007554	interferon alpha inducible protein 6 [Source:VGNC Symbol;Acc:VGNC:30047]	IFI6	1.44644	2.65689	0.0172733	0.164419
ENSBTAG00000007708	neuroligin 3 [Source:VGNC Symbol;Acc:VGNC:32110]	NLGN3	-1.69146	2.87648	0.0174371	0.165859
ENSBTAG00000019350	solute carrier family 25 member 21 [Source:VGNC Symbol;Acc:VGNC:34749]	SLC25A21	-1.51624	0.309422	0.0176052	0.167338
ENSBTAG00000038735	luteinizing hormone beta polypeptide [Source:NCBI gene (formerly Entrezgene);Acc:280839]	LHB	-1.6896	0.190133	0.017814	0.169201
ENSBTAG00000015026	ABL proto-oncogene 2, non-receptor tyrosine kinase [Source:VGNC Symbol;Acc:VGNC:50227]	ABL2	1.25737	6.03873	0.0178332	0.169262
ENSBTAG00000011733	GIPC PDZ domain containing family member 2 [Source:VGNC Symbol;Acc:VGNC:29366]	GIPC2	1.62797	1.38552	0.0178843	0.169626
ENSBTAG00000016805	sphingomyelin synthase 2 [Source:VGNC Symbol;Acc:VGNC:34544]	SGMS2	1.41542	4.52048	0.0178992	0.169646
ENSBTAG00000047613	HtrA serine peptidase 3 [Source:VGNC Symbol;Acc:VGNC:59337]	HTRA3	1.42778	6.15235	0.017944	0.169948
ENSBTAG00000031001	multiple EGF like domains 8 [Source:VGNC Symbol;Acc:VGNC:31376]	MEGF8	-1.45172	6.30732	0.0179682	0.170056
ENSBTAG00000005215	interleukin 10 receptor subunit alpha [Source:VGNC Symbol;Acc:VGNC:30107]	IL10RA	1.79076	0.478422	0.018121	0.17138
ENSBTAG00000018966	phospholipase C epsilon 1 [Source:VGNC Symbol;Acc:VGNC:32987]	PLCE1	-1.47516	2.5886	0.0183207	0.173145
ENSBTAG00000017094	serine hydroxymethyltransferase 1 [Source:VGNC Symbol;Acc:VGNC:34603]	SHMT1	-1.47906	1.69337	0.0183686	0.173474
ENSBTAG00000024663	ladinin 1 [Source:VGNC Symbol;Acc:VGNC:30766]	LAD1	1.54338	1.6375	0.0184963	0.174555
ENSBTAG00000017040	lymphocyte antigen 6 family member E [Source:VGNC Symbol;Acc:VGNC:31089]	LY6E	-1.45798	4.10916	0.0185554	0.174989
ENSBTAG00000021338	out at first homolog [Source:VGNC Symbol;Acc:VGNC:32389]	OAF	-1.57352	2.74165	0.0185758	0.175056
ENSBTAG00000031012	phosphatidylinositol glycan anchor biosynthesis class K [Source:VGNC Symbol;Acc:VGNC:32870]	PIGK	-1.23948	4.57592	0.0186043	0.1752
ENSBTAG00000021377	S100 calcium binding protein A14 [Source:VGNC Symbol;Acc:VGNC:34240]	S100A14	1.46207	6.16458	0.0186722	0.175715
ENSBTAG00000017069	golgi associated kinase 1B [Source:VGNC Symbol;Acc:VGNC:53900]	GASK1B	-1.71853	2.10871	0.0188032	0.176822
ENSBTAG00000046744	paralemmin 3 [Source:VGNC Symbol;Acc:VGNC:32559]	PALM3	1.3823	5.78701	0.018886	0.177475
ENSBTAG00000021687	jade family PHD finger 2 [Source:VGNC Symbol;Acc:VGNC:30359]	JADE2	-1.42908	5.01177	0.0189322	0.177783
ENSBTAG00000027916	MALT1 paracaspase [Source:VGNC Symbol;Acc:VGNC:31156]	MALT1	-1.32396	4.23435	0.018976	0.178068
ENSBTAG00000015576	neuronal PAS domain protein 1 [Source:VGNC Symbol;Acc:VGNC:32189]	NPAS1	1.60855	1.05002	0.0190214	0.178368
ENSBTAG00000033423	ephrin A3 [Source:NCBI gene (formerly Entrezgene);Acc:540776]	EFNA3	1.48448	1.05577	0.0190629	0.17863
ENSBTAG00000050772	#NA	#NA	-1.30586	2.27498	0.0191932	0.179725
ENSBTAG00000003994	insulin like growth factor binding protein 3 [Source:VGNC Symbol;Acc:VGNC:30085]	IGFBP3	-1.54119	5.33338	0.0192688	0.180177
ENSBTAG00000018745	centrosomal protein 290 [Source:VGNC Symbol;Acc:VGNC:27201]	CEP290	-1.51623	3.37961	0.0192596	0.180177
ENSBTAG00000047412	TNF superfamily member 18 [Source:VGNC Symbol;Acc:VGNC:36175]	TNFSF18	-1.56875	-0.594981	0.0193437	0.180751
ENSBTAG00000010166	CD99 molecule [Source:NCBI gene (formerly Entrezgene);Acc:104976701]	MIC2	1.49053	1.75454	0.0193964	0.181115
ENSBTAG00000050057	#NA	#NA	2.44916	-0.62545	0.0194124	0.181137
ENSBTAG00000002104	rhophilin Rho GTPase binding protein 1 [Source:VGNC Symbol;Acc:VGNC:33956]	RHPN1	-1.62426	1.70684	0.019485	0.181687
ENSBTAG00000012259	pyridoxamine 5'-phosphate oxidase [Source:VGNC Symbol;Acc:VGNC:33096]	PNPO	-1.20585	5.3838	0.0196288	0.182826
ENSBTAG00000014835	secreted protein acidic and cysteine rich [Source:VGNC Symbol;Acc:VGNC:35171]	SPARC	-1.19732	12.4173	0.0196349	0.182826
ENSBTAG00000001219	#NA	#NA	1.3103	2.76441	0.0198583	0.184777
ENSBTAG00000001597	phosphatidylinositol transfer protein membrane associated 2 [Source:VGNC Symbol;Acc:VGNC:32922]	PITPNM2	1.30983	4.87574	0.0198745	0.184798
ENSBTAG00000016574	regulator of G protein signaling 11 [Source:VGNC Symbol;Acc:VGNC:33912]	RGS11	-1.61459	3.12181	0.019971	0.185565
ENSBTAG00000015912	dermokine [Source:VGNC Symbol;Acc:VGNC:28107]	DMKN	-1.79755	-0.139734	0.0201378	0.186984
ENSBTAG00000017249	somatomedin B and thrombospondin type 1 domain containing [Source:VGNC Symbol;Acc:VGNC:34311]	SBSPON	1.34504	3.37149	0.0201831	0.187273
ENSBTAG00000012215	copine 7 [Source:VGNC Symbol;Acc:VGNC:27663]	CPNE7	-1.42323	2.20493	0.0205273	0.190067
ENSBTAG00000009575	TBC1 domain family member 32 [Source:VGNC Symbol;Acc:VGNC:35643]	TBC1D32	-1.38373	2.03441	0.0205128	0.190067
ENSBTAG00000020373	CFAP20 domain containing [Source:NCBI gene (formerly Entrezgene);Acc:534800]	CFAP20DC	1.77507	1.14202	0.020524	0.190067
ENSBTAG00000043951	inositol monophosphatase 2 [Source:VGNC Symbol;Acc:VGNC:30185]	IMPA2	1.72189	1.88512	0.0205703	0.190333
ENSBTAG00000003708	Sec23 homolog A, COPII coat complex component [Source:VGNC Symbol;Acc:VGNC:34410]	SEC23A	-1.19844	6.87983	0.0206677	0.190996
ENSBTAG00000032548	syntabulin [Source:VGNC Symbol;Acc:VGNC:35503]	SYBU	1.60011	0.0424679	0.0206708	0.190996
ENSBTAG00000048999	tripartite motif containing 6 [Source:NCBI gene (formerly Entrezgene);Acc:514492]	TRIM6	1.34352	3.19148	0.0207223	0.191339
ENSBTAG00000050182	#NA	#NA	2.43049	-0.555675	0.020908	0.19286
ENSBTAG00000048650	#NA	#NA	3.48792	0.636622	0.0209162	0.19286
ENSBTAG00000000175	NEDD4 binding protein 2 [Source:VGNC Symbol;Acc:VGNC:53766]	N4BP2	-1.40929	4.75161	0.0209851	0.19336
ENSBTAG00000047680	interferon regulatory factor 7 [Source:VGNC Symbol;Acc:VGNC:30278]	IRF7	1.42078	4.62464	0.0210755	0.194058
ENSBTAG00000021813	alpha-methylacyl-CoA racemase [Source:VGNC Symbol;Acc:VGNC:25856]	AMACR	1.2989	2.84693	0.0210975	0.194126
ENSBTAG00000014920	semaphorin 3E [Source:VGNC Symbol;Acc:VGNC:34430]	SEMA3E	1.50079	3.37341	0.021261	0.195495
ENSBTAG00000016541	calcium/calmodulin dependent protein kinase IG [Source:VGNC Symbol;Acc:VGNC:26720]	CAMK1G	-1.59705	1.85034	0.0216539	0.19897
ENSBTAG00000011500	calsequestrin 2 [Source:VGNC Symbol;Acc:VGNC:26787]	CASQ2	1.71429	0.139519	0.0216974	0.199231
ENSBTAG00000002070	#NA	#NA	1.87461	-0.689816	0.0217232	0.19933
ENSBTAG00000016836	pyruvate dehydrogenase kinase 1 [Source:VGNC Symbol;Acc:VGNC:32703]	PDK1	1.43997	5.91486	0.021881	0.200639
ENSBTAG00000000120	ubiquitin specific peptidase 43 [Source:VGNC Symbol;Acc:VGNC:36730]	USP43	1.35439	4.14938	0.0220403	0.20196
ENSBTAG00000006595	chromosome 25 C16orf71 homolog [Source:NCBI gene (formerly Entrezgene);Acc:618674]	C25H16orf71	-1.65282	2.12296	0.0220797	0.202181
ENSBTAG00000052404	#NA	#NA	1.65278	2.2953	0.0221531	0.202713
ENSBTAG00000004622	double zinc ribbon and ankyrin repeat domains 1 [Source:VGNC Symbol;Acc:VGNC:28283]	DZANK1	-1.67157	0.151278	0.0222294	0.20327
ENSBTAG00000014381	#NA	#NA	1.87504	-0.838239	0.0222774	0.203569
ENSBTAG00000009826	glycerol-3-phosphate dehydrogenase 1 like [Source:VGNC Symbol;Acc:VGNC:29530]	GPD1L	-1.20203	5.1014	0.0224058	0.204602
ENSBTAG00000032869	ribonuclease A family member 10 (inactive) [Source:NCBI gene (formerly Entrezgene);Acc:100140137]	RNASE10	-2.38499	-1.15312	0.0225407	0.205692
ENSBTAG00000000357	PEAK1 related, kinase-activating pseudokinase 1 [Source:NCBI gene (formerly Entrezgene);Acc:533821]	PRAG1	1.30566	7.2802	0.0226321	0.206384
ENSBTAG00000016328	splicing factor proline and glutamine rich [Source:VGNC Symbol;Acc:VGNC:34518]	SFPQ	-1.29082	7.86353	0.0226825	0.206701
ENSBTAG00000030973	tubulin, alpha 3d [Source:NCBI gene (formerly Entrezgene);Acc:535605]	TUBA1D	1.51929	1.68043	0.0227673	0.207331
ENSBTAG00000048345	#NA	#NA	-1.29536	3.29307	0.0227955	0.207446
ENSBTAG00000004409	isovaleryl-CoA dehydrogenase [Source:VGNC Symbol;Acc:VGNC:50203]	IVD	-1.25512	5.83312	0.0230261	0.2094
ENSBTAG00000011689	leukocyte receptor cluster member 8 [Source:VGNC Symbol;Acc:VGNC:30839]	LENG8	-1.37076	8.08298	0.0231261	0.210165
ENSBTAG00000031950	RAB3A interacting protein [Source:VGNC Symbol;Acc:VGNC:56227]	RAB3IP	1.61601	0.573704	0.0231803	0.210513
ENSBTAG00000019024	JAZF zinc finger 1 [Source:VGNC Symbol;Acc:VGNC:30372]	JAZF1	-1.67221	-0.312594	0.0232306	0.210826
ENSBTAG00000033510	myelin protein zero like 2 [Source:VGNC Symbol;Acc:VGNC:31593]	MPZL2	-1.27158	2.81917	0.0232892	0.211212
ENSBTAG00000029828	#NA	#NA	-1.50759	1.09185	0.0233097	0.211254
ENSBTAG00000021177	ADAM metallopeptidase with thrombospondin type 1 motif 14 [Source:VGNC Symbol;Acc:VGNC:25618]	ADAMTS14	-1.75559	-0.328624	0.0233394	0.211379
ENSBTAG00000049049	#NA	#NA	1.51213	-0.482801	0.0234594	0.21232
ENSBTAG00000019577	atypical chemokine receptor 4 [Source:VGNC Symbol;Acc:VGNC:25542]	ACKR4	-1.74838	0.0761634	0.0237751	0.214884
ENSBTAG00000002362	apolipoprotein L domain containing 1 [Source:VGNC Symbol;Acc:VGNC:26033]	APOLD1	1.44752	1.66319	0.0237715	0.214884
ENSBTAG00000051814	#NA	#NA	1.73754	-0.0780686	0.023935	0.216182
ENSBTAG00000017797	lymphocyte antigen 75 [Source:NCBI gene (formerly Entrezgene);Acc:407236]	LY75	-1.79131	-0.640751	0.0240162	0.216767
ENSBTAG00000001165	apoptosis inducing factor mitochondria associated 2 [Source:VGNC Symbol;Acc:VGNC:25762]	AIFM2	1.20277	5.58252	0.0240999	0.217375
ENSBTAG00000047675	sialic acid-binding Ig-like lectin 5 [Source:NCBI gene (formerly Entrezgene);Acc:618268]	0	-1.95539	0.862208	0.0241802	0.21795
ENSBTAG00000001668	Wnt family member 7A [Source:VGNC Symbol;Acc:VGNC:36963]	WNT7A	1.66591	1.24068	0.024238	0.218323
ENSBTAG00000000076	reversion inducing cysteine rich protein with kazal motifs [Source:VGNC Symbol;Acc:VGNC:33847]	RECK	-1.19029	5.95277	0.0243516	0.218988
ENSBTAG00000008634	WW domain binding protein 2 [Source:VGNC Symbol;Acc:VGNC:36872]	WBP2	1.18674	7.34772	0.0243413	0.218988
ENSBTAG00000000836	keratin 8 [Source:VGNC Symbol;Acc:VGNC:50407]	KRT8	1.30837	10.2906	0.0243614	0.218988
ENSBTAG00000016676	phosphotriesterase related [Source:VGNC Symbol;Acc:VGNC:33497]	PTER	-1.46065	1.51419	0.0245321	0.220373
ENSBTAG00000001911	protocadherin 11 X-linked [Source:NCBI gene (formerly Entrezgene);Acc:538674]	0	-1.38964	2.26224	0.0245625	0.220497
ENSBTAG00000013670	solute carrier family 46 member 2 [Source:VGNC Symbol;Acc:VGNC:34885]	SLC46A2	4.34193	-0.501892	0.0245893	0.220587
ENSBTAG00000009400	FAST kinase domains 3 [Source:VGNC Symbol;Acc:VGNC:28875]	FASTKD3	1.28737	4.08488	0.0246079	0.220605
ENSBTAG00000016170	potassium inwardly rectifying channel subfamily J member 11 [Source:VGNC Symbol;Acc:VGNC:30455]	KCNJ11	1.76122	0.0836283	0.0248216	0.222371
ENSBTAG00000000580	lymphocyte antigen 6 family member G6F [Source:NCBI gene (formerly Entrezgene);Acc:539920]	LY6G6F	2.63482	-0.749887	0.0248455	0.222434
ENSBTAG00000019919	#NA	#NA	-1.72119	-0.648979	0.0249801	0.223489
ENSBTAG00000017738	EMI domain containing 1 [Source:VGNC Symbol;Acc:VGNC:28472]	EMID1	-1.53471	2.84692	0.0250091	0.223597
ENSBTAG00000025124	zinc finger protein 300 [Source:VGNC Symbol;Acc:VGNC:49995]	ZNF300	1.61403	0.0823559	0.0250358	0.223685
ENSBTAG00000007884	sterol regulatory element binding transcription factor 1 [Source:VGNC Symbol;Acc:VGNC:35274]	SREBF1	1.40424	7.655	0.0250727	0.223864
ENSBTAG00000048053	#NA	#NA	1.65673	-0.377893	0.0251572	0.224466
ENSBTAG00000018569	cullin 4B [Source:VGNC Symbol;Acc:VGNC:27833]	CUL4B	-1.21961	5.78214	0.0252149	0.224679
ENSBTAG00000001113	NADH:ubiquinone oxidoreductase complex assembly factor 7 [Source:VGNC Symbol;Acc:VGNC:31959]	NDUFAF7	1.17604	4.32626	0.0252124	0.224679
ENSBTAG00000000202	solute carrier family 25 member 19 [Source:VGNC Symbol;Acc:VGNC:34747]	SLC25A19	1.2592	4.21407	0.0255694	0.227685
ENSBTAG00000000535	pecanex 2 [Source:VGNC Symbol;Acc:VGNC:32639]	PCNX2	-1.33819	1.92462	0.0256935	0.228636
ENSBTAG00000015073	CDP-L-ribitol pyrophosphorylase A [Source:VGNC Symbol;Acc:VGNC:30303]	CRPPA	-1.39175	1.90966	0.0257695	0.229158
ENSBTAG00000037986	PNMA family member 2 [Source:VGNC Symbol;Acc:VGNC:33084]	PNMA2	-1.65943	0.283024	0.0259001	0.230165
ENSBTAG00000013205	interleukin 1 receptor accessory protein [Source:VGNC Symbol;Acc:VGNC:30133]	IL1RAP	-1.21821	5.34523	0.0259526	0.230477
ENSBTAG00000002490	choline phosphotransferase 1 [Source:VGNC Symbol;Acc:VGNC:27314]	CHPT1	-1.34802	2.11739	0.0259721	0.230496
ENSBTAG00000005951	HIC ZBTB transcriptional repressor 2 [Source:VGNC Symbol;Acc:VGNC:29846]	HIC2	1.68274	2.75297	0.0260788	0.231288
ENSBTAG00000001163	macroH2A.2 histone [Source:VGNC Symbol;Acc:VGNC:55987]	MACROH2A2	-1.44116	1.38053	0.0261956	0.232168
ENSBTAG00000001068	zinc finger CW-type and PWWP domain containing 1 [Source:VGNC Symbol;Acc:VGNC:37125]	ZCWPW1	1.34721	4.34871	0.0262351	0.232363
ENSBTAG00000015460	tumor protein p63 [Source:VGNC Symbol;Acc:VGNC:36240]	TP63	-1.42031	5.56674	0.0262953	0.232741
ENSBTAG00000031287	transmembrane protein 158 [Source:VGNC Symbol;Acc:VGNC:99741]	TMEM158	1.23915	5.29319	0.0263758	0.233297
ENSBTAG00000032905	regulator of microtubule dynamics 2 [Source:VGNC Symbol;Acc:VGNC:33992]	RMDN2	-1.26	2.5644	0.0265833	0.234951
ENSBTAG00000015511	fatty acid desaturase 3 [Source:VGNC Symbol;Acc:VGNC:28703]	FADS3	1.21482	7.12711	0.0265982	0.234951
ENSBTAG00000018487	cilia and flagella associated protein 45 [Source:VGNC Symbol;Acc:VGNC:27244]	CFAP45	1.98547	0.0387472	0.0267031	0.23572
ENSBTAG00000017103	mitogen-activated protein kinase kinase kinase 13 [Source:VGNC Symbol;Acc:VGNC:31191]	MAP3K13	1.41624	3.68272	0.0270396	0.238531
ENSBTAG00000006161	MET proto-oncogene, receptor tyrosine kinase [Source:VGNC Symbol;Acc:VGNC:31394]	MET	1.20446	8.31027	0.0270974	0.238883
ENSBTAG00000007239	TNF alpha induced protein 6 [Source:VGNC Symbol;Acc:VGNC:36156]	TNFAIP6	-1.80776	-0.220167	0.0271344	0.23905
ENSBTAG00000015085	chloride intracellular channel 3 [Source:VGNC Symbol;Acc:VGNC:27441]	CLIC3	1.68993	3.26705	0.0273557	0.240804
ENSBTAG00000008546	#NA	#NA	1.70221	-0.230572	0.0273699	0.240804
ENSBTAG00000054461	#NA	#NA	1.93094	0.384627	0.0273988	0.240899
ENSBTAG00000018509	ethanolamine kinase 2 [Source:VGNC Symbol;Acc:VGNC:28625]	ETNK2	-1.51427	1.91473	0.0274786	0.24144
ENSBTAG00000020648	sec1 family domain containing 2 [Source:VGNC Symbol;Acc:VGNC:34331]	SCFD2	-1.29113	3.59651	0.0275237	0.241676
ENSBTAG00000003569	DAZ interacting zinc finger protein 1 [Source:VGNC Symbol;Acc:VGNC:28284]	DZIP1	-1.20099	6.87013	0.0276411	0.242546
ENSBTAG00000049599	family with sequence similarity 163 member A [Source:NCBI gene (formerly Entrezgene);Acc:613476]	FAM163A	-1.4067	2.59979	0.0277133	0.242858
ENSBTAG00000018398	#NA	#NA	2.92966	-1.11728	0.0277064	0.242858
ENSBTAG00000019125	solute carrier family 1 member 1 [Source:VGNC Symbol;Acc:VGNC:34711]	SLC1A1	1.29432	6.23052	0.0277955	0.243417
ENSBTAG00000006801	transmembrane protein 106A [Source:VGNC Symbol;Acc:VGNC:35944]	TMEM106A	-1.31625	4.88686	0.0278807	0.244003
ENSBTAG00000012071	asialoglycoprotein receptor 1 [Source:VGNC Symbol;Acc:VGNC:26209]	ASGR1	2.24734	-0.100597	0.0279401	0.244361
ENSBTAG00000012184	PTTG1 regulator of sister chromatid separation, securin [Source:NCBI gene (formerly Entrezgene);Acc:508043]	PTTG1	1.34928	5.25456	0.0279744	0.244499
ENSBTAG00000015974	FLVCR heme transporter 1 [Source:VGNC Symbol;Acc:VGNC:82540]	FLVCR1	-1.17333	4.54079	0.0280154	0.244697
ENSBTAG00000013579	store-operated calcium entry associated regulatory factor [Source:VGNC Symbol;Acc:VGNC:34288]	SARAF	1.18923	7.65723	0.0280792	0.245091
ENSBTAG00000011623	vacuole membrane protein 1 [Source:VGNC Symbol;Acc:VGNC:36806]	VMP1	1.49361	7.36031	0.0285606	0.24913
ENSBTAG00000054196	#NA	#NA	1.93937	0.124426	0.0285947	0.249263
ENSBTAG00000039992	tubulin alpha 1c [Source:NCBI gene (formerly Entrezgene);Acc:504244]	TUBA1C	-1.37151	1.63448	0.0287157	0.249989
ENSBTAG00000001092	phosphatase, orphan 2 [Source:VGNC Symbol;Acc:VGNC:32843]	PHOSPHO2	-1.24809	1.90822	0.0287097	0.249989
ENSBTAG00000052725	bta-mir-11997 [Source:miRBase;Acc:MI0038377]	bta-mir-11997	-1.41461	0.227444	0.0288171	0.250707
ENSBTAG00000006784	phospholipase A2, group IVB (cytosolic) [Source:NCBI gene (formerly Entrezgene);Acc:505485]	PLA2G4B	-1.46703	3.12597	0.0288518	0.250844
ENSBTAG00000005848	protogenin [Source:VGNC Symbol;Acc:VGNC:55137]	PRTG	-1.49658	-0.35121	0.0289709	0.251617
ENSBTAG00000043556	cytochrome c oxidase subunit II [Source:NCBI gene (formerly Entrezgene);Acc:3283880]	COX2	-1.49403	10.5525	0.0289787	0.251617
ENSBTAG00000039425	keratin 6A [Source:NCBI gene (formerly Entrezgene);Acc:614456]	KRT6A	1.43095	4.62087	0.0289993	0.251632
ENSBTAG00000054514	#NA	#NA	-1.5813	2.12242	0.0292229	0.253405
ENSBTAG00000044381	#NA	#NA	1.88823	-1.00706	0.0292508	0.253482
ENSBTAG00000043558	NADH dehydrogenase subunit 1 [Source:NCBI gene (formerly Entrezgene);Acc:3283877]	ND1	-1.55097	11.0436	0.0293308	0.254009
ENSBTAG00000000815	EPH receptor A2 [Source:VGNC Symbol;Acc:VGNC:28534]	EPHA2	1.27638	8.75546	0.0293822	0.254287
ENSBTAG00000038173	H2B clustered histone 12 [Source:VGNC Symbol;Acc:VGNC:83582]	H2BC12	1.70598	-0.267764	0.0294482	0.254692
ENSBTAG00000039968	phosphatidylinositol-4,5-bisphosphate 4-phosphatase 2 [Source:VGNC Symbol;Acc:VGNC:32910]	PIP4P2	-1.77026	-0.173369	0.0295534	0.255435
ENSBTAG00000016732	dynein axonemal intermediate chain 2 [Source:VGNC Symbol;Acc:VGNC:28130]	DNAI2	1.74688	1.27311	0.0296311	0.25594
ENSBTAG00000010344	solute carrier family 16 member 14 [Source:VGNC Symbol;Acc:VGNC:34688]	SLC16A14	-1.69891	-0.263366	0.0298026	0.257254
ENSBTAG00000032187	zinc finger protein 697 [Source:VGNC Symbol;Acc:VGNC:37331]	ZNF697	1.21858	3.91028	0.029938	0.258254
ENSBTAG00000010096	solute carrier family 5 member 2 [Source:VGNC Symbol;Acc:VGNC:34906]	SLC5A2	-1.43436	0.00876115	0.02999	0.258534
ENSBTAG00000019453	prostaglandin E synthase [Source:VGNC Symbol;Acc:VGNC:33505]	PTGES	1.28219	5.66438	0.030052	0.2589
ENSBTAG00000015702	paired like homeodomain 3 [Source:VGNC Symbol;Acc:VGNC:32926]	PITX3	2.00294	-0.5802	0.0301177	0.259298
ENSBTAG00000000399	#NA	#NA	1.85074	-1.21422	0.0301883	0.259737
ENSBTAG00000008022	prostaglandin F2 receptor inhibitor [Source:VGNC Symbol;Acc:VGNC:33508]	PTGFRN	-1.21305	6.74443	0.0303039	0.260393
ENSBTAG00000007981	G protein-coupled receptor kinase 5 [Source:VGNC Symbol;Acc:VGNC:29656]	GRK5	-1.15852	7.56077	0.0303035	0.260393
ENSBTAG00000001146	HIVEP zinc finger 2 [Source:VGNC Symbol;Acc:VGNC:96543]	HIVEP2	1.2962	6.47587	0.0303732	0.260667
ENSBTAG00000005146	#NA	#NA	1.58244	3.47823	0.030375	0.260667
ENSBTAG00000016165	keratin 7 [Source:VGNC Symbol;Acc:VGNC:30734]	KRT7	1.33974	5.58425	0.0304553	0.261187
ENSBTAG00000007156	ArfGAP with GTPase domain, ankyrin repeat and PH domain 2 [Source:VGNC Symbol;Acc:VGNC:25720]	AGAP2	-1.33859	3.32531	0.0304931	0.261341
ENSBTAG00000050993	#NA	#NA	1.98477	0.874143	0.0307071	0.263005
ENSBTAG00000004921	#NA	#NA	-1.43252	0.470476	0.0308037	0.263662
ENSBTAG00000053714	#NA	#NA	-1.40466	1.32497	0.0308897	0.264057
ENSBTAG00000001600	defective in cullin neddylation 1 domain containing 4 [Source:VGNC Symbol;Acc:VGNC:53698]	DCUN1D4	-1.2093	3.91186	0.0308709	0.264057
ENSBTAG00000021570	#NA	#NA	1.89255	-0.483443	0.0312091	0.266615
ENSBTAG00000044197	EDAR associated death domain [Source:VGNC Symbol;Acc:VGNC:28319]	EDARADD	-1.5776	0.340159	0.0313124	0.267166
ENSBTAG00000010353	ATPase copper transporting beta [Source:VGNC Symbol;Acc:VGNC:26328]	ATP7B	1.24231	4.68532	0.0313139	0.267166
ENSBTAG00000019554	fructose-bisphosphatase 2 [Source:VGNC Symbol;Acc:VGNC:28888]	FBP2	2.16653	-0.548909	0.0315319	0.268853
ENSBTAG00000051146	#NA	#NA	-1.31006	3.18915	0.0316393	0.269076
ENSBTAG00000010496	stromal antigen 3 [Source:VGNC Symbol;Acc:VGNC:97313]	STAG3	1.42731	0.983572	0.0316278	0.269076
ENSBTAG00000008376	spermatid-specific manchette-related protein 1 [Source:NCBI gene (formerly Entrezgene);Acc:540767]	SMRP1	1.46232	4.32077	0.0316366	0.269076
ENSBTAG00000018077	#NA	#NA	1.48889	-0.409857	0.0316127	0.269076
ENSBTAG00000011734	ankyrin repeat domain 1 [Source:VGNC Symbol;Acc:VGNC:25908]	ANKRD1	1.48714	8.30419	0.0317206	0.269595
ENSBTAG00000007802	BCL2 associated transcription factor 1 [Source:VGNC Symbol;Acc:VGNC:26451]	BCLAF1	1.32241	9.23754	0.031756	0.269723
ENSBTAG00000011311	coiled-coil domain containing 12 [Source:VGNC Symbol;Acc:VGNC:26838]	CCDC12	-1.28312	3.14774	0.0318679	0.270271
ENSBTAG00000010444	erb-b2 receptor tyrosine kinase 3 [Source:VGNC Symbol;Acc:VGNC:28564]	ERBB3	-1.21974	3.06579	0.031848	0.270271
ENSBTAG00000008301	WNK lysine deficient protein kinase 2 [Source:VGNC Symbol;Acc:VGNC:36950]	WNK2	1.20815	6.92231	0.0318818	0.270271
ENSBTAG00000054330	tubulin, beta 2B class IIb [Source:NCBI gene (formerly Entrezgene);Acc:281555]	TUBB2B	1.26914	5.32457	0.0319932	0.271042
ENSBTAG00000015405	dachsous cadherin-related 1 [Source:VGNC Symbol;Acc:VGNC:27913]	DCHS1	-1.30991	2.74495	0.032067	0.271494
ENSBTAG00000005717	gap junction protein beta 5 [Source:VGNC Symbol;Acc:VGNC:29380]	GJB5	-1.6733	-0.759918	0.0321315	0.271866
ENSBTAG00000007808	ANTXR cell adhesion molecule 1 [Source:VGNC Symbol;Acc:VGNC:25961]	ANTXR1	-1.2825	5.68687	0.0321908	0.272194
ENSBTAG00000003751	MET transcriptional regulator MACC1 [Source:VGNC Symbol;Acc:VGNC:53651]	MACC1	-1.42742	5.00323	0.032435	0.274084
ENSBTAG00000009846	methylenetetrahydrofolate dehydrogenase (NADP+ dependent) 1 like [Source:VGNC Symbol;Acc:VGNC:53798]	MTHFD1L	1.21917	6.76946	0.0328909	0.27776
ENSBTAG00000011527	5', 3'-nucleotidase, cytosolic [Source:VGNC Symbol;Acc:VGNC:32289]	NT5C	-1.18326	6.4243	0.033058	0.278993
ENSBTAG00000006991	#NA	#NA	2.32568	-1.1602	0.0331392	0.2795
ENSBTAG00000018938	cell death inducing p53 target 1 [Source:VGNC Symbol;Acc:VGNC:27113]	CDIP1	1.35656	6.19222	0.03319	0.27975
ENSBTAG00000015373	arylacetamide deacetylase like 3 [Source:VGNC Symbol;Acc:VGNC:25439]	AADACL3	-1.47744	-0.788048	0.033238	0.279977
ENSBTAG00000012351	aryl hydrocarbon receptor nuclear translocator 2 [Source:NCBI gene (formerly Entrezgene);Acc:533445]	ARNT2	-1.67782	-0.78767	0.0332724	0.280089
ENSBTAG00000004586	UDP-N-acetylglucosamine transferase subunit ALG13 homolog [Source:NCBI gene (formerly Entrezgene);Acc:107132045]	0	-1.26659	2.9155	0.0333144	0.280264
ENSBTAG00000007657	scavenger receptor class A member 3 [Source:VGNC Symbol;Acc:VGNC:34322]	SCARA3	-1.37643	3.82623	0.0335226	0.281836
ENSBTAG00000020893	matrilin 3 [Source:VGNC Symbol;Acc:VGNC:59347]	MATN3	1.4178	0.933434	0.0336504	0.282731
ENSBTAG00000019146	oxysterol binding protein 2 [Source:VGNC Symbol;Acc:VGNC:32457]	OSBP2	1.80748	-1.07649	0.0337613	0.283484
ENSBTAG00000027357	fibroblast growth factor 22 [Source:VGNC Symbol;Acc:VGNC:52233]	FGF22	1.2535	1.90407	0.0337935	0.283574
ENSBTAG00000002309	chondroitin sulfate proteoglycan 5 [Source:VGNC Symbol;Acc:VGNC:27770]	CSPG5	1.35432	3.79444	0.0338833	0.284148
ENSBTAG00000008564	nicotinamide N-methyltransferase [Source:NCBI gene (formerly Entrezgene);Acc:511161]	0	-1.7971	-0.484834	0.0340327	0.28522
ENSBTAG00000003958	transmembrane protein 220 [Source:VGNC Symbol;Acc:VGNC:36042]	TMEM220	-1.27294	2.66647	0.0340917	0.285534
ENSBTAG00000002661	immunoglobulin superfamily containing leucine rich repeat 2 [Source:VGNC Symbol;Acc:VGNC:30299]	ISLR2	1.7227	0.153558	0.0343487	0.287505
ENSBTAG00000001765	#NA	#NA	2.17563	-0.364984	0.0344616	0.288268
ENSBTAG00000002951	CD244 molecule [Source:VGNC Symbol;Acc:VGNC:27015]	CD244	1.72404	-0.160932	0.0344876	0.288303
ENSBTAG00000002999	anaphase promoting complex subunit 15 [Source:VGNC Symbol;Acc:VGNC:25882]	ANAPC15	-1.26121	3.08658	0.0346468	0.289452
ENSBTAG00000002695	myosin IH [Source:VGNC Symbol;Acc:VGNC:31823]	MYO1H	-1.49436	2.49109	0.0346854	0.289592
ENSBTAG00000049641	ecto-NOX disulfide-thiol exchanger 2 [Source:NCBI gene (formerly Entrezgene);Acc:100848511]	ENOX2	-1.2745	1.71273	0.0347407	0.289871
ENSBTAG00000008827	SPARC (osteonectin), cwcv and kazal like domains proteoglycan 2 [Source:VGNC Symbol;Acc:VGNC:35226]	SPOCK2	-1.26284	3.07881	0.035071	0.292442
ENSBTAG00000011349	cadherin 24 [Source:VGNC Symbol;Acc:VGNC:27101]	CDH24	-1.36429	7.4938	0.0352007	0.293339
ENSBTAG00000014401	sorbin and SH3 domain containing 3 [Source:VGNC Symbol;Acc:VGNC:35129]	SORBS3	-1.20234	7.1915	0.0354478	0.295213
ENSBTAG00000016588	post-glycosylphosphatidylinositol attachment to proteins 6 [Source:VGNC Symbol;Acc:VGNC:36123]	PGAP6	1.18644	5.14383	0.0355668	0.296017
ENSBTAG00000014515	replication factor C subunit 1 [Source:NCBI gene (formerly Entrezgene);Acc:514842]	RFC1	-1.47222	6.33886	0.0357831	0.297208
ENSBTAG00000055014	SH3 domain binding glutamate rich protein like 2 [Source:NCBI gene (formerly Entrezgene);Acc:785404]	SH3BGRL2	-1.41276	0.570555	0.0357782	0.297208
ENSBTAG00000018026	LanC like 2 [Source:VGNC Symbol;Acc:VGNC:30784]	LANCL2	-1.20142	5.1135	0.0357995	0.297208
ENSBTAG00000006273	sulfotransferase family 4A member 1 [Source:VGNC Symbol;Acc:VGNC:35469]	SULT4A1	1.35044	2.83864	0.0357933	0.297208
ENSBTAG00000018436	ubiquitin conjugating enzyme E2 J1 [Source:VGNC Symbol;Acc:VGNC:36585]	UBE2J1	1.19808	5.95492	0.0359763	0.298302
ENSBTAG00000018422	receptor interacting serine/threonine kinase 3 [Source:VGNC Symbol;Acc:VGNC:52818]	RIPK3	2.10905	1.59275	0.0359577	0.298302
ENSBTAG00000003265	adducin 3 [Source:VGNC Symbol;Acc:VGNC:25655]	ADD3	-1.35047	6.18161	0.0360058	0.29836
ENSBTAG00000004735	cyclin E1 [Source:VGNC Symbol;Acc:VGNC:26966]	CCNE1	-1.25246	3.12898	0.0361947	0.299551
ENSBTAG00000004509	SLX4 structure-specific endonuclease subunit [Source:VGNC Symbol;Acc:VGNC:34973]	SLX4	1.14023	6.72009	0.036187	0.299551
ENSBTAG00000050837	DEAF1 transcription factor [Source:NCBI gene (formerly Entrezgene);Acc:509260]	DEAF1	1.25867	5.60752	0.036242	0.299741
ENSBTAG00000020273	YOD1 deubiquitinase [Source:VGNC Symbol;Acc:VGNC:37033]	YOD1	1.41791	3.37375	0.036263	0.299741
ENSBTAG00000027625	secreted frizzled related protein 1 [Source:VGNC Symbol;Acc:VGNC:34520]	SFRP1	-1.88439	-0.388825	0.0365539	0.300458
ENSBTAG00000043049	#NA	#NA	-1.73175	-1.02116	0.0364226	0.300458
ENSBTAG00000002194	myocardial zonula adherens protein [Source:VGNC Symbol;Acc:VGNC:55127]	MYZAP	-1.59992	-0.142462	0.0364457	0.300458
ENSBTAG00000015885	PTPRF interacting protein alpha 4 [Source:VGNC Symbol;Acc:VGNC:33192]	PPFIA4	-1.28126	4.49634	0.0365235	0.300458
ENSBTAG00000018638	coiled-coil and C2 domain containing 2A [Source:VGNC Symbol;Acc:VGNC:26826]	CC2D2A	-1.25629	3.78978	0.0363956	0.300458
ENSBTAG00000002792	fucosyltransferase 11 [Source:VGNC Symbol;Acc:VGNC:29149]	FUT11	1.19752	4.98246	0.0364225	0.300458
ENSBTAG00000015717	hes related family bHLH transcription factor with YRPW motif 1 [Source:VGNC Symbol;Acc:VGNC:29828]	HEY1	1.26494	3.32421	0.036481	0.300458
ENSBTAG00000026156	vestigial like family member 3 [Source:VGNC Symbol;Acc:VGNC:36792]	VGLL3	1.38207	5.78221	0.0364892	0.300458
ENSBTAG00000054309	#NA	#NA	1.79913	-0.216978	0.0365477	0.300458
ENSBTAG00000008248	dystrophin [Source:NCBI gene (formerly Entrezgene);Acc:537655]	0	-1.31563	4.31566	0.0367435	0.30183
ENSBTAG00000020178	arylsulfatase family member K [Source:VGNC Symbol;Acc:VGNC:26179]	ARSK	-1.80927	-0.949968	0.036967	0.303478
ENSBTAG00000043578	iodothyronine deiodinase 3 [Source:NCBI gene (formerly Entrezgene);Acc:494549]	DIO3	2.53177	-1.12768	0.0371308	0.304634
ENSBTAG00000032544	sperm associated antigen 1 [Source:VGNC Symbol;Acc:VGNC:35164]	SPAG1	-1.54806	-0.145778	0.0371985	0.304851
ENSBTAG00000025130	HIC ZBTB transcriptional repressor 1 [Source:VGNC Symbol;Acc:VGNC:29845]	HIC1	1.55925	3.43881	0.0372097	0.304851
ENSBTAG00000019123	#NA	#NA	1.77211	-0.719775	0.0372263	0.304851
ENSBTAG00000019948	actin filament associated protein 1 like 1 [Source:VGNC Symbol;Acc:VGNC:25707]	AFAP1L1	-1.6611	0.666108	0.0372735	0.305049
ENSBTAG00000002526	3-hydroxybutyrate dehydrogenase 2 [Source:VGNC Symbol;Acc:VGNC:26458]	BDH2	-1.19246	4.77251	0.0373725	0.30567
ENSBTAG00000004261	spondin 2 [Source:VGNC Symbol;Acc:VGNC:35228]	SPON2	1.56503	0.242776	0.0376038	0.307373
ENSBTAG00000048515	#NA	#NA	-1.94759	-0.337018	0.0377201	0.308102
ENSBTAG00000015413	RAS p21 protein activator 2 [Source:VGNC Symbol;Acc:VGNC:33736]	RASA2	1.31872	5.5806	0.0377396	0.308102
ENSBTAG00000000442	retinol binding protein 4 [Source:VGNC Symbol;Acc:VGNC:33815]	RBP4	-1.21937	6.98017	0.0378254	0.308612
ENSBTAG00000013278	MAGI family member, X-linked [Source:VGNC Symbol;Acc:VGNC:56927]	MAGIX	1.19564	4.0704	0.0380392	0.310166
ENSBTAG00000017162	serine/threonine kinase 39 [Source:VGNC Symbol;Acc:VGNC:56152]	STK39	-1.45159	2.04781	0.038134	0.310586
ENSBTAG00000006609	ERBB receptor feedback inhibitor 1 [Source:VGNC Symbol;Acc:VGNC:28598]	ERRFI1	1.17277	7.98762	0.0381927	0.310586
ENSBTAG00000002571	programmed cell death 2 like [Source:VGNC Symbol;Acc:VGNC:52218]	PDCD2L	1.2364	3.33085	0.0382079	0.310586
ENSBTAG00000012697	phosphoglycerate mutase 1 [Source:VGNC Symbol;Acc:VGNC:55961]	PGAM1	1.24304	8.42603	0.0382071	0.310586
ENSBTAG00000017719	A-kinase anchoring protein 6 [Source:VGNC Symbol;Acc:VGNC:25787]	AKAP6	1.47341	3.97405	0.0382033	0.310586
ENSBTAG00000006335	signal transducer and activator of transcription 6 [Source:VGNC Symbol;Acc:VGNC:35374]	STAT6	1.15022	7.72353	0.0382403	0.310658
ENSBTAG00000044092	IQ motif containing K [Source:VGNC Symbol;Acc:VGNC:58601]	IQCK	-1.35218	2.13153	0.0383664	0.311301
ENSBTAG00000017132	tetratricopeptide repeat domain 22 [Source:VGNC Symbol;Acc:VGNC:50116]	TTC22	1.43186	1.32329	0.038346	0.311301
ENSBTAG00000008556	POU class 2 homeobox 2 [Source:VGNC Symbol;Acc:VGNC:59358]	POU2F2	1.55048	0.169213	0.0384472	0.311766
ENSBTAG00000003326	NLR family apoptosis inhibitory protein [Source:VGNC Symbol;Acc:VGNC:31873]	NAIP	1.57945	-0.52256	0.0389473	0.315628
ENSBTAG00000018520	sodium voltage-gated channel alpha subunit 1 [Source:VGNC Symbol;Acc:VGNC:34345]	SCN1A	-1.36598	2.00535	0.039063	0.316372
ENSBTAG00000000900	leucine rich repeat containing 8 VRAC subunit C [Source:VGNC Symbol;Acc:VGNC:31031]	LRRC8C	1.17749	5.87808	0.0391067	0.316532
ENSBTAG00000051443	#NA	#NA	1.39778	-0.103021	0.0391576	0.316751
ENSBTAG00000024715	protein tyrosine phosphatase receptor type J [Source:NCBI gene (formerly Entrezgene);Acc:508150]	PTPRJ	1.17445	6.63278	0.039227	0.317119
ENSBTAG00000008313	Kruppel like factor 15 [Source:VGNC Symbol;Acc:VGNC:30629]	KLF15	-1.59412	1.54486	0.0394955	0.318901
ENSBTAG00000019887	dihydroorotate dehydrogenase (quinone) [Source:NCBI gene (formerly Entrezgene);Acc:533873]	DHODH	1.30506	4.45105	0.0394896	0.318901
ENSBTAG00000002488	lactate dehydrogenase C [Source:VGNC Symbol;Acc:VGNC:56270]	LDHC	-1.78905	-0.739123	0.0395829	0.319411
ENSBTAG00000013960	phosphoserine aminotransferase 1 [Source:VGNC Symbol;Acc:VGNC:55075]	PSAT1	-1.24896	6.05883	0.0397319	0.320029
ENSBTAG00000051982	matrix remodeling associated 7 [Source:NCBI gene (formerly Entrezgene);Acc:617087]	0	-1.1719	5.0374	0.0397112	0.320029
ENSBTAG00000032068	#NA	#NA	2.8138	-0.341736	0.0396969	0.320029
ENSBTAG00000038042	C-X-C motif chemokine receptor 2 [Source:NCBI gene (formerly Entrezgene);Acc:782719]	CXCR2	2.0595	-0.977054	0.0398892	0.321101
ENSBTAG00000005828	MER proto-oncogene, tyrosine kinase [Source:VGNC Symbol;Acc:VGNC:31391]	MERTK	-1.31111	2.61933	0.0400319	0.322054
ENSBTAG00000052504	Kruppel like factor 2 [Source:NCBI gene (formerly Entrezgene);Acc:520939]	KLF2	1.34947	2.4722	0.0400609	0.322092
ENSBTAG00000049001	#NA	#NA	-1.53018	-0.174553	0.0402226	0.323
ENSBTAG00000017037	protein kinase N1 [Source:VGNC Symbol;Acc:VGNC:32945]	PKN1	1.25728	7.07587	0.0402164	0.323
ENSBTAG00000011173	family with sequence similarity 189 member A2 [Source:VGNC Symbol;Acc:VGNC:54429]	FAM189A2	-1.57611	-0.409611	0.0402673	0.323163
ENSBTAG00000044015	RNA binding motif protein 12 [Source:VGNC Symbol;Acc:VGNC:33785]	RBM12	-1.20928	5.16442	0.0403845	0.323907
ENSBTAG00000012088	fibulin 1 [Source:VGNC Symbol;Acc:VGNC:28881]	FBLN1	-1.17857	6.92507	0.040426	0.324044
ENSBTAG00000020471	sterile alpha motif domain containing 15 [Source:VGNC Symbol;Acc:VGNC:34270]	SAMD15	1.53709	1.29892	0.0404507	0.324046
ENSBTAG00000050503	#NA	#NA	1.7983	-1.14747	0.0407567	0.3263
ENSBTAG00000049416	RAB20, member RAS oncogene family [Source:NCBI gene (formerly Entrezgene);Acc:615760]	RAB20	-1.39993	2.54912	0.0407825	0.326309
ENSBTAG00000021318	secretory carrier membrane protein 5 [Source:VGNC Symbol;Acc:VGNC:34319]	SCAMP5	1.35061	0.477257	0.0408118	0.326347
ENSBTAG00000000146	FERM, ARH/RhoGEF and pleckstrin domain protein 1 [Source:VGNC Symbol;Acc:VGNC:28865]	FARP1	-1.22013	4.49545	0.0408834	0.326684
ENSBTAG00000006396	glucose-6-phosphate isomerase [Source:VGNC Symbol;Acc:VGNC:29534]	GPI	1.14959	9.25467	0.0409034	0.326684
ENSBTAG00000042180	#NA	#NA	-1.58054	-0.796842	0.0410138	0.327024
ENSBTAG00000002313	inositol 1,4,5-trisphosphate receptor type 2 [Source:VGNC Symbol;Acc:VGNC:30347]	ITPR2	-1.29627	3.64929	0.0410199	0.327024
ENSBTAG00000035995	TNF alpha induced protein 2 [Source:VGNC Symbol;Acc:VGNC:53955]	TNFAIP2	1.44178	2.37642	0.0410061	0.327024
ENSBTAG00000021023	zinc finger MYM-type containing 4 [Source:VGNC Symbol;Acc:VGNC:37200]	ZMYM4	-1.26509	4.91648	0.0412422	0.328598
ENSBTAG00000004901	phosphatidylinositol-4-phosphate 3-kinase catalytic subunit type 2 alpha [Source:NCBI gene (formerly Entrezgene);Acc:537790]	PIK3C2A	-1.26015	5.64229	0.0413171	0.328998
ENSBTAG00000029897	#NA	#NA	1.85759	-1.01578	0.0413637	0.329171
ENSBTAG00000031595	#NA	#NA	1.42624	-0.558794	0.0413947	0.329219
ENSBTAG00000013308	RNA binding motif protein X-linked [Source:VGNC Symbol;Acc:VGNC:56951]	RBMX	-1.15277	6.12788	0.0414266	0.329275
ENSBTAG00000001598	microtubule associated protein 7 [Source:VGNC Symbol;Acc:VGNC:31210]	MAP7	-1.33704	2.03473	0.0416155	0.330578
ENSBTAG00000016685	flavin containing dimethylaniline monoxygenase 4 [Source:VGNC Symbol;Acc:VGNC:29052]	FMO4	-1.36212	1.70814	0.041669	0.330751
ENSBTAG00000019568	intraflagellar transport 74 [Source:VGNC Symbol;Acc:VGNC:30072]	IFT74	-1.34344	4.25389	0.0416871	0.330751
ENSBTAG00000015638	interleukin 20 receptor subunit alpha [Source:VGNC Symbol;Acc:VGNC:30139]	IL20RA	-1.57919	-0.626775	0.0417925	0.331388
ENSBTAG00000024947	testicular cell adhesion molecule 1 [Source:NCBI gene (formerly Entrezgene);Acc:616168]	TCAM1	1.17467	4.38824	0.0418508	0.331653
ENSBTAG00000053163	#NA	#NA	-1.91154	-0.897911	0.0419952	0.332598
ENSBTAG00000043560	cytochrome c oxidase subunit III [Source:NCBI gene (formerly Entrezgene);Acc:3283883]	COX3	-1.49369	11.8037	0.0421196	0.333384
ENSBTAG00000026768	#NA	#NA	1.81315	-0.48785	0.0421961	0.33379
ENSBTAG00000000791	calcyon neuron specific vesicular protein [Source:VGNC Symbol;Acc:VGNC:26718]	CALY	-1.41894	-0.1857	0.0423332	0.334674
ENSBTAG00000007149	NYN domain and retroviral integrase containing [Source:VGNC Symbol;Acc:VGNC:32387]	NYNRIN	-1.28936	4.44805	0.0424858	0.335681
ENSBTAG00000011483	scavenger receptor class F member 1 [Source:VGNC Symbol;Acc:VGNC:34326]	SCARF1	-1.60071	1.0484	0.0426068	0.336436
ENSBTAG00000008113	odd-skipped related transcription factor 1 [Source:VGNC Symbol;Acc:VGNC:32476]	OSR1	-1.18407	5.40121	0.0426456	0.336542
ENSBTAG00000048010	nudix hydrolase 14 [Source:VGNC Symbol;Acc:VGNC:32328]	NUDT14	-1.48771	2.15771	0.0427365	0.337058
ENSBTAG00000009412	sialic acid acetylesterase [Source:VGNC Symbol;Acc:VGNC:34613]	SIAE	1.22416	3.60233	0.0427785	0.337189
ENSBTAG00000012311	calcium voltage-gated channel auxiliary subunit gamma 5 [Source:VGNC Symbol;Acc:VGNC:26690]	CACNG5	-1.47039	1.18782	0.0429271	0.338159
ENSBTAG00000009841	carnosine dipeptidase 2 [Source:VGNC Symbol;Acc:VGNC:27494]	CNDP2	-1.14431	5.41272	0.0432093	0.339887
ENSBTAG00000000817	synaptojanin 2 [Source:VGNC Symbol;Acc:VGNC:35528]	SYNJ2	1.17072	5.92605	0.0432098	0.339887
ENSBTAG00000021766	heparin binding EGF like growth factor [Source:VGNC Symbol;Acc:VGNC:29765]	HBEGF	1.20584	3.61577	0.0432234	0.339887
ENSBTAG00000019698	#NA	#NA	1.73433	-0.644485	0.0434038	0.341104
ENSBTAG00000004879	forkhead box O4 [Source:VGNC Symbol;Acc:VGNC:29100]	FOXO4	-1.28282	5.18261	0.0437035	0.342848
ENSBTAG00000018105	activin A receptor type 2B [Source:VGNC Symbol;Acc:VGNC:25596]	ACVR2B	1.30991	2.74091	0.0436912	0.342848
ENSBTAG00000050620	#NA	#NA	1.55763	0.518358	0.0436595	0.342848
ENSBTAG00000033299	#NA	#NA	2.00425	-0.792074	0.0437772	0.343224
ENSBTAG00000053696	#NA	#NA	-1.42766	0.479681	0.0438388	0.343504
ENSBTAG00000007214	elongation factor for RNA polymerase II 2 [Source:VGNC Symbol;Acc:VGNC:28436]	ELL2	1.23575	6.70232	0.0441863	0.345817
ENSBTAG00000012223	TNF superfamily member 14 [Source:VGNC Symbol;Acc:VGNC:36173]	TNFSF14	2.52963	-1.27276	0.0441709	0.345817
ENSBTAG00000006608	gamma-glutamyltransferase 5 [Source:VGNC Symbol;Acc:VGNC:29344]	GGT5	-1.43793	3.95349	0.044473	0.347822
ENSBTAG00000013009	aurora kinase A [Source:VGNC Symbol;Acc:VGNC:26349]	AURKA	1.23096	6.43946	0.044495	0.347822
ENSBTAG00000016467	solute carrier family 22 member 17 [Source:VGNC Symbol;Acc:VGNC:34725]	SLC22A17	-1.34659	5.08811	0.044544	0.348
ENSBTAG00000053289	#NA	#NA	1.29817	3.77217	0.0445934	0.348181
ENSBTAG00000015097	calcium channel flower domain containing 1 [Source:VGNC Symbol;Acc:VGNC:26670]	CACFD1	-1.43595	4.71243	0.0448893	0.349667
ENSBTAG00000005295	solute carrier family 35 member E1 [Source:VGNC Symbol;Acc:VGNC:34830]	SLC35E1	1.21461	5.87289	0.0448212	0.349667
ENSBTAG00000040208	THAP domain containing 10 [Source:NCBI gene (formerly Entrezgene);Acc:785266]	THAP10	1.65576	-0.43391	0.0448385	0.349667
ENSBTAG00000053422	#NA	#NA	1.84039	-1.02666	0.0448823	0.349667
ENSBTAG00000021199	cytochrome c oxidase assembly factor 8 [Source:VGNC Symbol;Acc:VGNC:26037]	COA8	1.31341	4.87526	0.044921	0.349708
ENSBTAG00000008997	endoglin [Source:VGNC Symbol;Acc:VGNC:102821]	ENG	1.34325	3.65377	0.0450187	0.350263
ENSBTAG00000003763	myosin VC [Source:VGNC Symbol;Acc:VGNC:31828]	MYO5C	-1.32095	2.60118	0.0451262	0.350894
ENSBTAG00000019498	integrin subunit alpha 3 [Source:VGNC Symbol;Acc:VGNC:30315]	ITGA3	1.17872	9.20821	0.0457574	0.355592
ENSBTAG00000017280	complement C3 [Source:VGNC Symbol;Acc:VGNC:26638]	C3	-1.20689	9.66924	0.0459001	0.356358
ENSBTAG00000017826	selenocysteine lyase [Source:VGNC Symbol;Acc:VGNC:55677]	SCLY	-1.20485	4.15865	0.0459365	0.356358
ENSBTAG00000000400	keratin 85 [Source:VGNC Symbol;Acc:VGNC:50410]	KRT85	1.36332	2.50034	0.0459274	0.356358
ENSBTAG00000013065	homeostatic iron regulator [Source:VGNC Symbol;Acc:VGNC:29831]	HFE	-1.21347	3.06827	0.0460587	0.357097
ENSBTAG00000003212	neuronatin [Source:VGNC Symbol;Acc:VGNC:32142]	NNAT	-1.39862	3.74986	0.0465818	0.360941
ENSBTAG00000053911	#NA	#NA	-1.34681	4.5109	0.0468865	0.36309
ENSBTAG00000045767	linker for activation of T cells family member 2 [Source:VGNC Symbol;Acc:VGNC:30799]	LAT2	1.58535	-0.543025	0.0470191	0.363903
ENSBTAG00000043575	#NA	#NA	-1.73856	-0.377482	0.0471367	0.364601
ENSBTAG00000015690	perilipin 4 [Source:VGNC Symbol;Acc:VGNC:55299]	PLIN4	-1.38984	1.72422	0.0472077	0.364937
ENSBTAG00000047083	four-jointed box kinase 1 [Source:VGNC Symbol;Acc:VGNC:54869]	FJX1	-1.4865	4.361	0.0474502	0.366597
ENSBTAG00000009218	anillin actin binding protein [Source:VGNC Symbol;Acc:VGNC:25950]	ANLN	1.26264	9.47346	0.0475721	0.367325
ENSBTAG00000019343	MyoD family inhibitor [Source:VGNC Symbol;Acc:VGNC:31329]	MDFI	-1.25987	4.06494	0.0476092	0.367398
ENSBTAG00000016381	RRAD and GEM like GTPase 2 [Source:VGNC Symbol;Acc:VGNC:33864]	REM2	1.63207	1.11306	0.0477279	0.367885
ENSBTAG00000038442	WD repeat domain 87 [Source:VGNC Symbol;Acc:VGNC:52260]	WDR87	1.68753	1.11745	0.0477009	0.367885
ENSBTAG00000007075	major histocompatibility complex, class I, A-like [Source:NCBI gene (formerly Entrezgene);Acc:616942]	0	1.24603	3.69541	0.0480811	0.370393
ENSBTAG00000021899	phosphodiesterase 9A [Source:VGNC Symbol;Acc:VGNC:32688]	PDE9A	-1.37548	2.12256	0.0484011	0.372641
ENSBTAG00000050332	#NA	#NA	1.37532	-0.024228	0.0485868	0.373853
ENSBTAG00000017500	potassium two pore domain channel subfamily K member 12 [Source:VGNC Symbol;Acc:VGNC:30467]	KCNK12	-1.50951	2.53617	0.0486429	0.374067
ENSBTAG00000013455	speckle type BTB/POZ protein like [Source:VGNC Symbol;Acc:VGNC:35230]	SPOPL	-1.18918	4.88764	0.0489948	0.376555
ENSBTAG00000052632	TGFB induced factor homeobox 2 [Source:NCBI gene (formerly Entrezgene);Acc:535632]	TGIF2	1.23072	4.08732	0.0490386	0.376674
ENSBTAG00000044073	CD248 molecule [Source:VGNC Symbol;Acc:VGNC:27017]	CD248	-1.31846	3.41213	0.0492998	0.378345
ENSBTAG00000019181	BAR/IMD domain containing adaptor protein 2 like 1 [Source:VGNC Symbol;Acc:VGNC:26413]	BAIAP2L1	-1.28199	3.69195	0.0493134	0.378345
ENSBTAG00000047801	cysteine rich with EGF like domains 2 [Source:VGNC Symbol;Acc:VGNC:27705]	CRELD2	-1.25115	4.77232	0.0494683	0.379314
ENSBTAG00000037819	SFT2 domain containing 2 [Source:VGNC Symbol;Acc:VGNC:34525]	SFT2D2	-1.18767	4.61839	0.0495334	0.379594
ENSBTAG00000003221	activating transcription factor 7 interacting protein [Source:VGNC Symbol;Acc:VGNC:26246]	ATF7IP	1.27502	7.12976	0.0496195	0.380033
ENSBTAG00000014031	toll like receptor 6 [Source:VGNC Symbol;Acc:VGNC:50030]	TLR6	-1.30737	0.255781	0.0497898	0.381118
ENSBTAG00000004383	formin binding protein 1 like [Source:VGNC Symbol;Acc:VGNC:29060]	FNBP1L	-1.27614	6.17834	0.0500237	0.382687
ENSBTAG00000048401	#NA	#NA	-1.38591	0.957266	0.0500944	0.383007
ENSBTAG00000010360	leucine rich repeats and immunoglobulin like domains 1 [Source:VGNC Symbol;Acc:VGNC:30982]	LRIG1	-1.2217	2.59783	0.0502699	0.384127
ENSBTAG00000021048	adrenomedullin [Source:VGNC Symbol;Acc:VGNC:25681]	ADM	1.21478	4.00835	0.0503374	0.384421
ENSBTAG00000016438	telomere repeat binding bouquet formation protein 1 [Source:VGNC Symbol;Acc:VGNC:35748]	TERB1	-1.92002	-0.901256	0.0503709	0.384456
ENSBTAG00000008772	structural maintenance of chromosomes 2 [Source:VGNC Symbol;Acc:VGNC:34999]	SMC2	-1.34059	7.3303	0.0507067	0.386795
ENSBTAG00000010989	phosphoinositide-3-kinase regulatory subunit 1 [Source:VGNC Symbol;Acc:VGNC:32894]	PIK3R1	-1.26928	6.44009	0.0508253	0.387477
ENSBTAG00000008462	family with sequence similarity 43 member A [Source:VGNC Symbol;Acc:VGNC:28813]	FAM43A	-1.3596	3.81531	0.0509507	0.38821
ENSBTAG00000015609	phosphatidylinositol-3,4,5-trisphosphate dependent Rac exchange factor 1 [Source:VGNC Symbol;Acc:VGNC:57017]	PREX1	-1.67413	-0.533949	0.0511323	0.389156
ENSBTAG00000018731	putative protein FAM172B [Source:NCBI gene (formerly Entrezgene);Acc:524181]	0	-1.3357	0.884857	0.0511336	0.389156
ENSBTAG00000000804	MOB kinase activator 3B [Source:VGNC Symbol;Acc:VGNC:31545]	MOB3B	-1.50061	-0.308246	0.0512177	0.389572
ENSBTAG00000008350	kelch like family member 21 [Source:VGNC Symbol;Acc:VGNC:30650]	KLHL21	1.25165	5.84756	0.0512564	0.389643
ENSBTAG00000019277	potassium voltage-gated channel subfamily H member 3 [Source:VGNC Symbol;Acc:VGNC:30445]	KCNH3	-1.45086	1.8584	0.0514503	0.390893
ENSBTAG00000017393	L3MBTL histone methyl-lysine binding protein 3 [Source:VGNC Symbol;Acc:VGNC:50640]	L3MBTL3	-1.25284	5.87667	0.0515501	0.391427
ENSBTAG00000039341	zinc finger protein 525 [Source:NCBI gene (formerly Entrezgene);Acc:100296121]	0	1.23597	2.75446	0.0515949	0.391542
ENSBTAG00000010967	ciliary associated calcium binding coiled-coil 1 [Source:VGNC Symbol;Acc:VGNC:54529]	CABCOCO1	-1.2923	0.220081	0.051631	0.391592
ENSBTAG00000032558	tetratricopeptide repeat domain 7A [Source:VGNC Symbol;Acc:VGNC:36480]	TTC7A	-1.26473	4.81711	0.0518488	0.392603
ENSBTAG00000052744	chromosome 18 C16orf74 homolog [Source:NCBI gene (formerly Entrezgene);Acc:613483]	0	1.30687	3.89743	0.0518123	0.392603
ENSBTAG00000021928	divergent protein kinase domain 1B [Source:VGNC Symbol;Acc:VGNC:28825]	DIPK1B	1.46434	1.59257	0.0518532	0.392603
ENSBTAG00000016688	#NA	#NA	1.37415	1.1075	0.0519538	0.39314
ENSBTAG00000032372	histone H3 associated protein kinase [Source:VGNC Symbol;Acc:VGNC:55834]	HASPIN	1.12547	5.47392	0.0520323	0.393509
ENSBTAG00000047600	ROS proto-oncogene 1, receptor tyrosine kinase [Source:VGNC Symbol;Acc:VGNC:34091]	ROS1	-1.261	1.96476	0.0521444	0.394116
ENSBTAG00000015304	annexin A9 [Source:VGNC Symbol;Acc:VGNC:25970]	ANXA9	-1.23462	1.48298	0.0521929	0.394116
ENSBTAG00000007490	sulfatase 2 [Source:VGNC Symbol;Acc:VGNC:35466]	SULF2	-1.14778	7.18368	0.0522018	0.394116
ENSBTAG00000009427	protein phosphatase, Mg2+/Mn2+ dependent 1D [Source:VGNC Symbol;Acc:VGNC:33210]	PPM1D	1.18413	6.25208	0.0522647	0.394142
ENSBTAG00000052665	cytochrome P450, subfamily IIIA, polypeptide 4 [Source:NCBI gene (formerly Entrezgene);Acc:507988]	CYP3A4	1.27516	3.90686	0.0522485	0.394142
ENSBTAG00000034033	LHFPL tetraspan subfamily member 6 [Source:VGNC Symbol;Acc:VGNC:30869]	LHFPL6	-1.27844	4.1981	0.0524336	0.394741
ENSBTAG00000018993	integrin subunit beta 7 [Source:VGNC Symbol;Acc:VGNC:30332]	ITGB7	-1.26209	1.56241	0.0524253	0.394741
ENSBTAG00000054839	tigger transposable element-derived protein 1-like [Source:NCBI gene (formerly Entrezgene);Acc:101903385]	0	1.41912	2.61621	0.0524055	0.394741
ENSBTAG00000009788	acyl-CoA thioesterase 2 [Source:NCBI gene (formerly Entrezgene);Acc:785383]	0	-1.57764	-0.736557	0.0524899	0.394941
ENSBTAG00000013755	integrin subunit beta 5 [Source:VGNC Symbol;Acc:VGNC:30330]	ITGB5	-1.1629	5.67774	0.052664	0.395801
ENSBTAG00000049851	phorbol-12-myristate-13-acetate-induced protein 1 [Source:NCBI gene (formerly Entrezgene);Acc:100296226]	0	1.26892	1.72152	0.0526601	0.395801
ENSBTAG00000014642	nicotinate phosphoribosyltransferase [Source:VGNC Symbol;Acc:VGNC:31885]	NAPRT	-1.58012	-0.317219	0.0527271	0.396051
ENSBTAG00000013613	small integral membrane protein 7 [Source:VGNC Symbol;Acc:VGNC:52884]	SMIM7	-1.17965	4.87108	0.0529034	0.396794
ENSBTAG00000051341	frizzled class receptor 9 [Source:HGNC Symbol;Acc:HGNC:4047]	FZD9	1.57549	1.15615	0.0529159	0.396794
ENSBTAG00000048660	#NA	#NA	1.84274	-0.985481	0.0528615	0.396794
ENSBTAG00000002717	internexin neuronal intermediate filament protein alpha [Source:VGNC Symbol;Acc:VGNC:30191]	INA	1.2358	2.01722	0.0534415	0.400509
ENSBTAG00000048296	collectrin, amino acid transport regulator [Source:NCBI gene (formerly Entrezgene);Acc:513188]	CLTRN	-1.31149	3.07572	0.0535452	0.401059
ENSBTAG00000055247	#NA	#NA	-1.52599	0.670357	0.0537176	0.402123
ENSBTAG00000020267	Wnt family member 9A [Source:VGNC Symbol;Acc:VGNC:36966]	WNT9A	1.36884	2.3658	0.0537918	0.402451
ENSBTAG00000006307	hydroxysteroid 17-beta dehydrogenase 11 [Source:VGNC Symbol;Acc:VGNC:29970]	HSD17B11	-1.26003	1.70586	0.0539257	0.403225
ENSBTAG00000020892	interleukin 2 receptor subunit alpha [Source:VGNC Symbol;Acc:VGNC:56188]	IL2RA	1.70256	-0.296215	0.0541234	0.404476
ENSBTAG00000035064	chromosome 4 C7orf57 homolog [Source:NCBI gene (formerly Entrezgene);Acc:614195]	C4H7orf57	-1.24375	4.36211	0.0542231	0.404992
ENSBTAG00000014818	myosin light chain kinase 3 [Source:VGNC Symbol;Acc:VGNC:31807]	MYLK3	-1.27745	2.14242	0.0545687	0.407344
ENSBTAG00000015952	ArfGAP with dual PH domains 1 [Source:VGNC Symbol;Acc:VGNC:25633]	ADAP1	1.17162	4.5675	0.0546758	0.407914
ENSBTAG00000003338	leucine rich repeat and coiled-coil centrosomal protein 1 [Source:VGNC Symbol;Acc:VGNC:52802]	LRRCC1	-1.3695	5.57443	0.0547678	0.40837
ENSBTAG00000019596	G protein-coupled receptor class C group 5 member B [Source:VGNC Symbol;Acc:VGNC:29607]	GPRC5B	1.37032	4.84191	0.0549948	0.409832
ENSBTAG00000006017	nuclear factor kappa B subunit 2 [Source:VGNC Symbol;Acc:VGNC:32044]	NFKB2	1.24327	7.73706	0.0551741	0.410937
ENSBTAG00000054989	#NA	#NA	1.43804	0.61642	0.055285	0.411531
ENSBTAG00000033160	family with sequence similarity 114 member A1 [Source:VGNC Symbol;Acc:VGNC:53713]	FAM114A1	-1.24262	5.03483	0.0554859	0.412795
ENSBTAG00000006864	complement C4-like [Source:NCBI gene (formerly Entrezgene);Acc:107131209]	0	-1.33718	0.0171346	0.0557233	0.414329
ENSBTAG00000002881	adaptor related protein complex 4 subunit mu 1 [Source:VGNC Symbol;Acc:VGNC:25993]	AP4M1	-1.27036	5.15201	0.0557772	0.414497
ENSBTAG00000003491	solute carrier family 25 member 23 [Source:VGNC Symbol;Acc:VGNC:55309]	SLC25A23	-1.14773	4.47236	0.0558617	0.414892
ENSBTAG00000050733	ATPase H+ transporting accessory protein 1 like [Source:NCBI gene (formerly Entrezgene);Acc:510390]	ATP6AP1L	1.30866	1.40667	0.0560621	0.416147
ENSBTAG00000007665	natriuretic peptide receptor 3 [Source:NCBI gene (formerly Entrezgene);Acc:281358]	NPR3	-1.30162	8.64477	0.0562461	0.416813
ENSBTAG00000020541	phosphatidylinositol glycan anchor biosynthesis class Y [Source:NCBI gene (formerly Entrezgene);Acc:514374]	PYURF	1.16876	6.32762	0.0562448	0.416813
ENSBTAG00000019658	ankyrin repeat and SOCS box containing 16 [Source:VGNC Symbol;Acc:VGNC:26193]	ASB16	1.50743	0.483405	0.0562338	0.416813
ENSBTAG00000047301	#NA	#NA	1.48008	0.306999	0.0562893	0.416899
ENSBTAG00000049604	#NA	#NA	-1.47458	0.438836	0.0563552	0.417116
ENSBTAG00000019689	#NA	#NA	-1.29762	0.526367	0.0563815	0.417116
ENSBTAG00000018774	#NA	#NA	1.18253	6.53152	0.0564319	0.417256
ENSBTAG00000015801	ephrin B1 [Source:VGNC Symbol;Acc:VGNC:28359]	EFNB1	-1.27316	6.48371	0.056472	0.41732
ENSBTAG00000004471	ST3 beta-galactoside alpha-2,3-sialyltransferase 6 [Source:VGNC Symbol;Acc:VGNC:35335]	ST3GAL6	2.92267	-0.697264	0.0567761	0.419333
ENSBTAG00000014650	nuclear factor of activated T cells 2 interacting protein [Source:VGNC Symbol;Acc:VGNC:32032]	NFATC2IP	1.12973	6.13989	0.0569394	0.420305
ENSBTAG00000030168	MIF4G domain containing [Source:VGNC Symbol;Acc:VGNC:31472]	MIF4GD	1.15917	5.09114	0.0570986	0.421245
ENSBTAG00000021980	Ras association domain family member 8 [Source:VGNC Symbol;Acc:VGNC:33764]	RASSF8	1.24397	5.37559	0.0571934	0.42171
ENSBTAG00000005715	fucose mutarotase [Source:VGNC Symbol;Acc:VGNC:29145]	FUOM	-1.33214	4.26906	0.057308	0.422085
ENSBTAG00000048125	ectonucleoside triphosphate diphosphohydrolase 2 [Source:VGNC Symbol;Acc:VGNC:28509]	ENTPD2	1.32662	1.27976	0.0572857	0.422085
ENSBTAG00000043584	ATP synthase F0 subunit 6 [Source:NCBI gene (formerly Entrezgene);Acc:3283882]	ATP6	-1.48134	11.0986	0.0574222	0.422691
ENSBTAG00000017685	junction plakoglobin [Source:VGNC Symbol;Acc:VGNC:30388]	JUP	1.19416	8.63059	0.057527	0.423227
ENSBTAG00000050387	#NA	#NA	1.31167	0.968079	0.0576008	0.423535
ENSBTAG00000049341	SERTA domain containing 2 [Source:NCBI gene (formerly Entrezgene);Acc:786476]	SERTAD2	1.222	7.02917	0.0577405	0.424327
ENSBTAG00000005413	NLR family CARD domain containing 5 [Source:VGNC Symbol;Acc:VGNC:32114]	NLRC5	1.49804	0.0912904	0.0578788	0.425108
ENSBTAG00000001060	C-X-C motif chemokine receptor 4 [Source:VGNC Symbol;Acc:VGNC:27856]	CXCR4	1.35459	0.398052	0.0580447	0.42609
ENSBTAG00000012302	reticulon 4 receptor like 1 [Source:VGNC Symbol;Acc:VGNC:34207]	RTN4RL1	-1.33728	0.625573	0.0581033	0.426284
ENSBTAG00000022293	citrate synthase lysine methyltransferase [Source:VGNC Symbol;Acc:VGNC:31402]	CSKMT	-1.2371	3.11934	0.0583659	0.427973
ENSBTAG00000051090	Kruppel like factor 13 [Source:NCBI gene (formerly Entrezgene);Acc:789710]	KLF13	-1.23806	3.60311	0.0584144	0.428092
ENSBTAG00000052803	protein phosphatase 2 regulatory subunit B''beta [Source:NCBI gene (formerly Entrezgene);Acc:100298789]	0	1.16567	5.24721	0.0586279	0.429419
ENSBTAG00000018314	mediator complex subunit 11 [Source:VGNC Symbol;Acc:VGNC:31348]	MED11	-1.17377	2.76425	0.058687	0.429614
ENSBTAG00000009211	ubiquitin conjugating enzyme E2 S [Source:VGNC Symbol;Acc:VGNC:36595]	UBE2S	1.25227	7.13148	0.0588286	0.430414
ENSBTAG00000004862	TUB bipartite transcription factor [Source:VGNC Symbol;Acc:VGNC:36503]	TUB	-1.20741	2.96467	0.0588762	0.430524
ENSBTAG00000010802	potassium two pore domain channel subfamily K member 7 [Source:VGNC Symbol;Acc:VGNC:30477]	KCNK7	-1.41441	1.15803	0.0590213	0.431347
ENSBTAG00000009290	FAM161 centrosomal protein A [Source:VGNC Symbol;Acc:VGNC:28742]	FAM161A	-1.25216	1.17237	0.0594333	0.434118
ENSBTAG00000006138	semaphorin 3C [Source:VGNC Symbol;Acc:VGNC:34428]	SEMA3C	1.18981	5.08289	0.0594856	0.434261
ENSBTAG00000031217	myosin light chain 6B [Source:VGNC Symbol;Acc:VGNC:31803]	MYL6B	1.20332	4.14937	0.0596097	0.434928
ENSBTAG00000030198	transmembrane protein 232 [Source:VGNC Symbol;Acc:VGNC:36046]	TMEM232	-1.52234	-0.796697	0.0597624	0.435802
ENSBTAG00000019942	poly(A) binding protein cytoplasmic 5 [Source:VGNC Symbol;Acc:VGNC:53658]	PABPC5	-1.24625	1.53546	0.0599399	0.436855
ENSBTAG00000018238	ankyrin repeat and BTB domain containing 1 [Source:VGNC Symbol;Acc:VGNC:25515]	ABTB1	-1.40044	5.97634	0.060022	0.437214
ENSBTAG00000039954	COPI coat complex subunit zeta 2 [Source:VGNC Symbol;Acc:VGNC:27608]	COPZ2	-1.20128	5.08117	0.0602983	0.438503
ENSBTAG00000052846	#NA	#NA	1.25559	1.88588	0.0602496	0.438503
ENSBTAG00000000496	#NA	#NA	1.4873	-0.0583868	0.0602966	0.438503
ENSBTAG00000015027	#NA	#NA	-1.45376	-0.14616	0.0603445	0.438598
ENSBTAG00000019517	elastin [Source:NCBI gene (formerly Entrezgene);Acc:280781]	ELN	1.211	2.43368	0.060401	0.438768
ENSBTAG00000054964	#NA	#NA	1.28038	1.64189	0.0607536	0.441088
ENSBTAG00000014382	KN motif and ankyrin repeat domains 4 [Source:VGNC Symbol;Acc:VGNC:55243]	KANK4	-1.26708	4.81065	0.0609097	0.441979
ENSBTAG00000006060	doublecortin domain containing 1 [Source:NCBI gene (formerly Entrezgene);Acc:616832]	DCDC1	-1.63302	-1.12464	0.0611118	0.443203
ENSBTAG00000010485	mitofusin 1 [Source:VGNC Symbol;Acc:VGNC:31427]	MFN1	-1.19747	5.92134	0.0618878	0.448585
ENSBTAG00000051385	#NA	#NA	-1.28812	1.22152	0.0621461	0.449719
ENSBTAG00000006048	dephospho-CoA kinase domain containing [Source:VGNC Symbol;Acc:VGNC:50119]	DCAKD	-1.15423	4.1282	0.0621229	0.449719
ENSBTAG00000054520	mitochondrial matrix import factor 23 [Source:NCBI gene (formerly Entrezgene);Acc:508149]	MIX23	1.25301	5.99621	0.0620815	0.449719
ENSBTAG00000022489	E3 ubiquitin-protein ligase RNF213 [Source:NCBI gene (formerly Entrezgene);Acc:509283]	0	-1.20902	4.21955	0.0623043	0.450357
ENSBTAG00000039571	proline and serine rich 2 [Source:VGNC Symbol;Acc:VGNC:33368]	PROSER2	-1.1717	5.44995	0.0623362	0.450357
ENSBTAG00000012191	WW and C2 domain containing 2 [Source:VGNC Symbol;Acc:VGNC:36975]	WWC2	1.1002	9.01694	0.0623252	0.450357
ENSBTAG00000030322	kelch domain containing 7A [Source:VGNC Symbol;Acc:VGNC:30637]	KLHDC7A	-1.4184	4.15772	0.0625841	0.451901
ENSBTAG00000054548	H2A clustered histone 12 [Source:VGNC Symbol;Acc:VGNC:83580]	H2AC12	1.53754	-0.594427	0.0628109	0.453293
ENSBTAG00000009391	ADP-ribosylarginine hydrolase [Source:VGNC Symbol;Acc:VGNC:25690]	ADPRH	1.16238	3.64838	0.0629953	0.454375
ENSBTAG00000009046	T-box transcription factor 6 [Source:VGNC Symbol;Acc:VGNC:35672]	TBX6	1.27098	1.04641	0.0631147	0.454989
ENSBTAG00000049042	#NA	#NA	-1.42604	0.31866	0.0631955	0.455323
ENSBTAG00000030338	gap junction protein alpha 9 [Source:VGNC Symbol;Acc:VGNC:55195]	GJA9	1.46304	-0.222958	0.0633788	0.456396
ENSBTAG00000031267	serpin family B member 9 [Source:VGNC Symbol;Acc:VGNC:54235]	SERPINB9	1.13963	5.20653	0.0637193	0.458599
ENSBTAG00000008142	interferon induced with helicase C domain 1 [Source:VGNC Symbol;Acc:VGNC:30048]	IFIH1	-1.42586	0.255422	0.0638773	0.459487
ENSBTAG00000009942	phospholipase C like 2 [Source:VGNC Symbol;Acc:VGNC:32992]	PLCL2	-1.33788	1.69576	0.0639667	0.459744
ENSBTAG00000038180	sodium voltage-gated channel alpha subunit 2 [Source:VGNC Symbol;Acc:VGNC:34347]	SCN2A	-1.32442	0.261338	0.0640172	0.459744
ENSBTAG00000053845	ras GTPase-activating protein 3-like [Source:NCBI gene (formerly Entrezgene);Acc:112449111]	0	-1.26641	0.290097	0.0639965	0.459744
ENSBTAG00000000621	cation channel sperm associated auxiliary subunit gamma [Source:VGNC Symbol;Acc:VGNC:26798]	CATSPERG	-1.22233	5.32667	0.0640721	0.459889
ENSBTAG00000000062	RAS like family 12 [Source:VGNC Symbol;Acc:VGNC:33756]	RASL12	-1.36977	-0.244287	0.0646698	0.463176
ENSBTAG00000000959	zinc finger SWIM-type containing 1 [Source:VGNC Symbol;Acc:VGNC:37381]	ZSWIM1	1.15751	3.19179	0.0646184	0.463176
ENSBTAG00000051855	#NA	#NA	1.2815	2.00022	0.0645762	0.463176
ENSBTAG00000048011	#NA	#NA	1.40446	-0.089601	0.0646479	0.463176
ENSBTAG00000011997	zinc finger MIZ-type containing 2 [Source:VGNC Symbol;Acc:VGNC:37196]	ZMIZ2	1.14185	6.81388	0.0648009	0.463864
ENSBTAG00000017124	G protein signaling modulator 2 [Source:VGNC Symbol;Acc:VGNC:29615]	GPSM2	-1.2048	4.64809	0.0648952	0.464288
ENSBTAG00000006253	filamin C [Source:VGNC Symbol;Acc:VGNC:29035]	FLNC	1.15877	9.24635	0.0650395	0.465069
ENSBTAG00000013580	lysine demethylase 3A [Source:VGNC Symbol;Acc:VGNC:30525]	KDM3A	1.20524	7.3117	0.0650816	0.46512
ENSBTAG00000009982	immunoglobulin superfamily member 8 [Source:VGNC Symbol;Acc:VGNC:30096]	IGSF8	-1.18433	5.59657	0.0653611	0.466865
ENSBTAG00000048329	#NA	#NA	1.27191	2.14598	0.0656469	0.468654
ENSBTAG00000049668	#NA	#NA	-1.49589	-0.0913445	0.0656964	0.468755
ENSBTAG00000010798	solute carrier family 23 member 1 [Source:VGNC Symbol;Acc:VGNC:34733]	SLC23A1	-1.24435	2.06272	0.0659627	0.470401
ENSBTAG00000026696	doublecortin domain containing 2B [Source:VGNC Symbol;Acc:VGNC:27911]	DCDC2B	-1.52436	-0.532318	0.0664363	0.473524
ENSBTAG00000047658	PHD finger protein 7 [Source:VGNC Symbol;Acc:VGNC:32827]	PHF7	1.26313	1.59344	0.0665306	0.473941
ENSBTAG00000012720	ankyrin repeat domain 2 [Source:VGNC Symbol;Acc:VGNC:25915]	ANKRD2	1.22388	1.74544	0.0667955	0.475572
ENSBTAG00000006368	NEDD4 binding protein 3 [Source:VGNC Symbol;Acc:VGNC:31853]	N4BP3	1.25698	4.30127	0.066872	0.475862
ENSBTAG00000000960	#NA	#NA	2.35777	-0.862696	0.0671116	0.47731
ENSBTAG00000051655	#NA	#NA	-1.87564	-0.789566	0.0674901	0.479745
ENSBTAG00000000532	exonuclease 5 [Source:VGNC Symbol;Acc:VGNC:59180]	EXO5	-1.13611	5.47693	0.0675732	0.480078
ENSBTAG00000004885	discoidin domain receptor tyrosine kinase 2 [Source:VGNC Symbol;Acc:VGNC:27953]	DDR2	-1.13439	4.41555	0.06772	0.480605
ENSBTAG00000019639	sorting nexin 16 [Source:VGNC Symbol;Acc:VGNC:35096]	SNX16	1.21381	3.63514	0.0677189	0.480605
ENSBTAG00000012426	INO80 complex subunit C [Source:VGNC Symbol;Acc:VGNC:97279]	INO80C	-1.15658	3.41156	0.0684897	0.485807
ENSBTAG00000010361	delta like canonical Notch ligand 4 [Source:VGNC Symbol;Acc:VGNC:28096]	DLL4	1.75485	-0.925051	0.0685299	0.485833
ENSBTAG00000052787	family with sequence similarity 71 member A [Source:NCBI gene (formerly Entrezgene);Acc:616153]	FAM71A	2.15229	-0.87902	0.0686298	0.486281
ENSBTAG00000021260	polypeptide N-acetylgalactosaminyltransferase 11 [Source:VGNC Symbol;Acc:VGNC:29224]	GALNT11	-1.15537	4.57023	0.0687805	0.487088
ENSBTAG00000011962	phospholipase A2 group III [Source:VGNC Symbol;Acc:VGNC:32959]	PLA2G3	1.29871	2.0825	0.0692708	0.490298
ENSBTAG00000007002	alpha-L-iduronidase [Source:VGNC Symbol;Acc:VGNC:30037]	IDUA	-1.28053	4.97266	0.0693349	0.49049
ENSBTAG00000048558	#NA	#NA	1.47387	-0.168097	0.0694	0.490688
ENSBTAG00000042758	Small nucleolar RNA SNORD29 [Source:RFAM;Acc:RF00070]	SNORD29	-1.38238	0.603407	0.0696283	0.49204
ENSBTAG00000003033	growth arrest and DNA damage inducible gamma [Source:VGNC Symbol;Acc:VGNC:29208]	GADD45G	-1.25992	2.91541	0.0697162	0.492399
ENSBTAG00000013133	TBC1 domain family member 10C [Source:VGNC Symbol;Acc:VGNC:35625]	TBC1D10C	1.27466	1.25085	0.0699923	0.494085
ENSBTAG00000040056	leukotriene B4 receptor 2 [Source:VGNC Symbol;Acc:VGNC:31070]	LTB4R2	1.55284	2.74505	0.0701519	0.494948
ENSBTAG00000024561	H3.3 histone A [Source:VGNC Symbol;Acc:VGNC:83611]	H3-3A	-1.15383	4.44789	0.0702238	0.495192
ENSBTAG00000013469	SRC kinase signaling inhibitor 1 [Source:VGNC Symbol;Acc:VGNC:35270]	SRCIN1	1.36655	0.121685	0.0702643	0.495214
ENSBTAG00000006214	lysyl oxidase like 2 [Source:VGNC Symbol;Acc:VGNC:30953]	LOXL2	1.1032	9.67978	0.0705969	0.497029
ENSBTAG00000001110	solute carrier family 16 member 5 [Source:VGNC Symbol;Acc:VGNC:34691]	SLC16A5	1.30743	4.32285	0.0705896	0.497029
ENSBTAG00000016627	WASP family member 1 [Source:VGNC Symbol;Acc:VGNC:36865]	WASF1	-1.36983	0.1236	0.0710833	0.499131
ENSBTAG00000018172	2-oxoglutarate and iron dependent oxygenase domain containing 3 [Source:VGNC Symbol;Acc:VGNC:32410]	OGFOD3	-1.22088	2.14785	0.0710162	0.499131
ENSBTAG00000011648	trimethyllysine hydroxylase, epsilon [Source:VGNC Symbol;Acc:VGNC:36134]	TMLHE	-1.17683	2.27675	0.0710515	0.499131
ENSBTAG00000008654	hook microtubule tethering protein 2 [Source:VGNC Symbol;Acc:VGNC:29906]	HOOK2	1.18468	4.72681	0.0709988	0.499131
ENSBTAG00000002027	family with sequence similarity 167 member B [Source:VGNC Symbol;Acc:VGNC:28751]	FAM167B	2.74666	-0.658849	0.0710838	0.499131
ENSBTAG00000031658	semaphorin 6B [Source:VGNC Symbol;Acc:VGNC:34442]	SEMA6B	1.29389	4.2579	0.071318	0.500245
ENSBTAG00000017740	tubulin alpha like 3 [Source:VGNC Symbol;Acc:VGNC:36505]	TUBAL3	2.23712	-0.850044	0.0712968	0.500245
ENSBTAG00000053103	trichohyalin [Source:NCBI gene (formerly Entrezgene);Acc:613296]	0	1.41649	0.249587	0.0713889	0.500478
ENSBTAG00000005164	granzyme K [Source:VGNC Symbol;Acc:VGNC:29733]	GZMK	1.91598	-0.0798187	0.0714534	0.500665
ENSBTAG00000006443	PR/SET domain 11 [Source:VGNC Symbol;Acc:VGNC:54473]	PRDM11	-1.26719	2.1122	0.0719061	0.503448
ENSBTAG00000043602	#NA	#NA	1.45116	-0.874413	0.0719266	0.503448
ENSBTAG00000004782	protein tyrosine phosphatase receptor type C associated protein [Source:VGNC Symbol;Acc:VGNC:33547]	PTPRCAP	-1.30858	2.40548	0.0720531	0.504067
ENSBTAG00000000728	zinc finger protein 597 [Source:HGNC Symbol;Acc:HGNC:26573]	ZNF597	1.35161	-0.480675	0.0721955	0.504797
ENSBTAG00000005092	receptor tyrosine kinase like orphan receptor 2 [Source:VGNC Symbol;Acc:VGNC:34087]	ROR2	-1.18673	5.35298	0.0723929	0.505833
ENSBTAG00000006878	TATA-box binding protein associated factor 1 [Source:NCBI gene (formerly Entrezgene);Acc:785085]	TAF1L	1.16448	6.95627	0.07242	0.505833
ENSBTAG00000006590	nudix hydrolase 16 like 1 [Source:VGNC Symbol;Acc:VGNC:32331]	NUDT16L1	-1.23118	3.98037	0.0726799	0.507181
ENSBTAG00000006039	Rho GDP dissociation inhibitor beta [Source:VGNC Symbol;Acc:VGNC:26102]	ARHGDIB	1.45597	-0.350807	0.0726896	0.507181
ENSBTAG00000016560	DnaJ heat shock protein family (Hsp40) member C4 [Source:VGNC Symbol;Acc:VGNC:53656]	DNAJC4	-1.2359	3.46139	0.0727715	0.507485
ENSBTAG00000006015	DNA polymerase eta [Source:VGNC Symbol;Acc:VGNC:33124]	POLH	1.16952	6.97829	0.0728235	0.507581
ENSBTAG00000023734	par-6 family cell polarity regulator alpha [Source:VGNC Symbol;Acc:VGNC:32583]	PARD6A	1.24094	1.77827	0.0730249	0.508717
ENSBTAG00000005410	regulator of G protein signaling 7 [Source:VGNC Symbol;Acc:VGNC:33923]	RGS7	-1.27088	0.939589	0.0735361	0.512009
ENSBTAG00000004048	melanin concentrating hormone receptor 1 [Source:VGNC Symbol;Acc:VGNC:31305]	MCHR1	-1.72791	-1.32292	0.0739968	0.514468
ENSBTAG00000039581	homeobox D4 [Source:VGNC Symbol;Acc:VGNC:97278]	HOXD4	-1.29892	0.909512	0.0740057	0.514468
ENSBTAG00000002615	LON peptidase N-terminal domain and ring finger 3 [Source:VGNC Symbol;Acc:VGNC:30950]	LONRF3	1.22999	2.30303	0.0739786	0.514468
ENSBTAG00000037558	chemokine (C-X-C motif) ligand 1 (melanoma growth stimulating activity, alpha) [Source:NCBI gene (formerly Entrezgene);Acc:281212]	GRO1	1.31837	7.57109	0.0741221	0.515007
ENSBTAG00000039556	WD repeat domain, phosphoinositide interacting 1 [Source:VGNC Symbol;Acc:VGNC:36942]	WIPI1	-1.1337	5.29209	0.0741668	0.515047
ENSBTAG00000003484	CXXC motif containing zinc binding protein [Source:VGNC Symbol;Acc:VGNC:54904]	CZIB	-1.11414	4.85563	0.0743849	0.516291
ENSBTAG00000026896	forkhead box F2 [Source:VGNC Symbol;Acc:VGNC:29085]	FOXF2	-1.19767	1.94685	0.0745307	0.517033
ENSBTAG00000043550	cytochrome b [Source:NCBI gene (formerly Entrezgene);Acc:3283889]	CYTB	-1.42248	10.9558	0.0748279	0.518644
ENSBTAG00000001898	coiled-coil domain containing 112 [Source:VGNC Symbol;Acc:VGNC:26834]	CCDC112	1.23285	4.39376	0.0748413	0.518644
ENSBTAG00000002938	cadherin like and PC-esterase domain containing 1 [Source:VGNC Symbol;Acc:VGNC:27651]	CPED1	-1.20831	3.10604	0.0749375	0.519039
ENSBTAG00000050807	#NA	#NA	1.38308	-0.780087	0.0751309	0.520107
ENSBTAG00000005154	APC down-regulated 1 [Source:VGNC Symbol;Acc:VGNC:26007]	APCDD1	-1.30379	1.2168	0.0752653	0.520765
ENSBTAG00000040298	glutathione S-transferase theta 1 [Source:NCBI gene (formerly Entrezgene);Acc:517724]	GSTT1	-1.35611	5.47073	0.0755025	0.522134
ENSBTAG00000003705	family with sequence similarity 83 member G [Source:VGNC Symbol;Acc:VGNC:28838]	FAM83G	1.28041	5.03372	0.0757586	0.523631
ENSBTAG00000053885	#NA	#NA	-1.43392	0.363221	0.0759272	0.52433
ENSBTAG00000021955	NPC intracellular cholesterol transporter 2 [Source:VGNC Symbol;Acc:VGNC:32196]	NPC2	1.11879	6.04273	0.0759388	0.52433
ENSBTAG00000031851	selectin P ligand [Source:VGNC Symbol;Acc:VGNC:34425]	SELPLG	1.7715	0.777794	0.0762722	0.526358
ENSBTAG00000003261	aurora kinase C [Source:NCBI gene (formerly Entrezgene);Acc:618599]	AURKC	1.20638	2.05636	0.0763601	0.52669
ENSBTAG00000021421	signal sequence receptor subunit 4 [Source:VGNC Symbol;Acc:VGNC:35322]	SSR4	-1.102	7.09437	0.0765537	0.527476
ENSBTAG00000000892	cyclic GMP-AMP synthase [Source:VGNC Symbol;Acc:VGNC:31271]	CGAS	1.21441	4.97132	0.076515	0.527476
ENSBTAG00000021242	coenzyme Q7, hydroxylase [Source:VGNC Symbol;Acc:VGNC:27615]	COQ7	-1.13815	3.39844	0.076968	0.530055
ENSBTAG00000005353	desmin [Source:VGNC Symbol;Acc:VGNC:28013]	DES	1.26229	0.706488	0.0771489	0.531025
ENSBTAG00000000868	ZFP1 zinc finger protein [Source:VGNC Symbol;Acc:VGNC:37159]	ZFP1	-1.2535	1.38422	0.0772572	0.531494
ENSBTAG00000023416	protein phosphatase 2 regulatory subunit B''alpha [Source:VGNC Symbol;Acc:VGNC:33258]	PPP2R3A	-1.23153	5.15152	0.0773205	0.531654
ENSBTAG00000015470	synaptophysin like 2 [Source:VGNC Symbol;Acc:VGNC:54496]	SYPL2	-1.45921	-0.843443	0.0774892	0.532537
ENSBTAG00000015776	major facilitator superfamily domain containing 14A [Source:VGNC Symbol;Acc:VGNC:54453]	MFSD14A	1.13243	6.7872	0.0777812	0.534267
ENSBTAG00000006879	homeobox C11 [Source:VGNC Symbol;Acc:VGNC:56207]	HOXC11	-1.34773	-0.261874	0.0779144	0.534905
ENSBTAG00000005674	neuraminidase 1 [Source:VGNC Symbol;Acc:VGNC:50230]	NEU1	1.2218	5.47303	0.078038	0.535275
ENSBTAG00000019280	crystallin beta B1 [Source:VGNC Symbol;Acc:VGNC:27736]	CRYBB1	1.30142	0.32614	0.0780492	0.535275
ENSBTAG00000019321	coiled-coil domain containing 57 [Source:VGNC Symbol;Acc:VGNC:26901]	CCDC57	-1.1327	3.8125	0.0782996	0.536231
ENSBTAG00000023947	arginine vasopressin induced 1 [Source:VGNC Symbol;Acc:VGNC:26357]	AVPI1	1.2751	6.38321	0.0783113	0.536231
ENSBTAG00000016334	#NA	#NA	1.31661	-0.703619	0.0783504	0.536231
ENSBTAG00000034368	serine protease 33 [Source:HGNC Symbol;Acc:HGNC:30405]	PRSS33	1.49148	0.475641	0.0783204	0.536231
ENSBTAG00000050087	UFM1 specific peptidase 1 (inactive) [Source:NCBI gene (formerly Entrezgene);Acc:527939]	UFSP1	1.16899	1.71102	0.0787674	0.538528
ENSBTAG00000011358	immediate early response 3 [Source:VGNC Symbol;Acc:VGNC:30039]	IER3	1.20418	8.64936	0.0787353	0.538528
ENSBTAG00000048631	TIAM Rac1 associated GEF 1 [Source:NCBI gene (formerly Entrezgene);Acc:536517]	0	-1.29255	3.01527	0.0790472	0.540163
ENSBTAG00000000362	SPG11 vesicle trafficking associated, spatacsin [Source:VGNC Symbol;Acc:VGNC:35207]	SPG11	-1.14601	5.33406	0.0794726	0.54279
ENSBTAG00000031573	nicotinamide riboside kinase 2 [Source:NCBI gene (formerly Entrezgene);Acc:780788]	NMRK2	1.75189	-0.939374	0.0795652	0.543142
ENSBTAG00000014599	leucine rich repeat containing 66 [Source:VGNC Symbol;Acc:VGNC:31024]	LRRC66	-1.27788	0.768664	0.0797695	0.544129
ENSBTAG00000008631	coronin 1A [Source:VGNC Symbol;Acc:VGNC:27620]	CORO1A	-1.20411	2.34215	0.0797968	0.544129
ENSBTAG00000047000	#NA	#NA	1.27856	3.80437	0.0798329	0.544129
ENSBTAG00000045628	chromosome 10 C15orf61 homolog [Source:VGNC Symbol;Acc:VGNC:52613]	C10H15orf61	1.38554	1.16779	0.0798969	0.544285
ENSBTAG00000020647	RAS like family 11 member B [Source:VGNC Symbol;Acc:VGNC:33755]	RASL11B	-1.17288	3.20265	0.0801454	0.545697
ENSBTAG00000019695	RLF zinc finger [Source:VGNC Symbol;Acc:VGNC:33990]	RLF	1.12842	6.64551	0.0801896	0.545718
ENSBTAG00000005729	F-box and leucine rich repeat protein 4 [Source:VGNC Symbol;Acc:VGNC:59171]	FBXL4	-1.1734	2.19108	0.0804123	0.546952
ENSBTAG00000017776	chromodomain helicase DNA binding protein 2 [Source:VGNC Symbol;Acc:VGNC:27278]	CHD2	1.16518	6.35446	0.0805683	0.547732
ENSBTAG00000001842	glutathione S-transferase mu 3 [Source:VGNC Symbol;Acc:VGNC:29686]	GSTM3	-1.17203	3.57912	0.0807561	0.548728
ENSBTAG00000015537	RAS protein activator like 2 [Source:VGNC Symbol;Acc:VGNC:33738]	RASAL2	1.24648	4.65746	0.0809407	0.5497
ENSBTAG00000012851	solute carrier family 5 member 1 [Source:VGNC Symbol;Acc:VGNC:49970]	SLC5A1	-1.33402	0.935534	0.0810849	0.55032
ENSBTAG00000005934	tweety family member 3 [Source:VGNC Symbol;Acc:VGNC:36502]	TTYH3	-1.23596	8.27858	0.081115	0.55032
ENSBTAG00000023182	WNK lysine deficient protein kinase 3 [Source:VGNC Symbol;Acc:VGNC:36951]	WNK3	-1.28264	0.931217	0.0811638	0.550369
ENSBTAG00000021105	interleukin 1 receptor associated kinase 4 [Source:VGNC Symbol;Acc:VGNC:30268]	IRAK4	-1.13423	5.12828	0.0814463	0.55179
ENSBTAG00000054451	#NA	#NA	1.21797	0.697762	0.0814566	0.55179
ENSBTAG00000023659	metallothionein 2A [Source:NCBI gene (formerly Entrezgene);Acc:404070]	MT2A	-1.27061	7.13276	0.0818262	0.55401
ENSBTAG00000000566	coiled-coil domain containing 14 [Source:VGNC Symbol;Acc:VGNC:26851]	CCDC14	-1.19312	3.92304	0.0818895	0.554155
ENSBTAG00000034918	interferon induced protein with tetratricopeptide repeats 2 [Source:VGNC Symbol;Acc:VGNC:30049]	IFIT2	1.37573	-0.135175	0.0821091	0.555357
ENSBTAG00000049754	family with sequence similarity 177 member B [Source:NCBI gene (formerly Entrezgene);Acc:100847316]	FAM177B	1.20102	1.82957	0.0823281	0.555987
ENSBTAG00000011112	potassium two pore domain channel subfamily K member 5 [Source:VGNC Symbol;Acc:VGNC:30475]	KCNK5	1.34763	-0.569907	0.0822927	0.555987
ENSBTAG00000003638	#NA	#NA	1.75875	-0.836555	0.0822707	0.555987
ENSBTAG00000001956	histidine triad nucleotide binding protein 3 [Source:VGNC Symbol;Acc:VGNC:29856]	HINT3	1.22193	2.68768	0.0823965	0.556166
ENSBTAG00000004641	pleckstrin homology domain containing A6 [Source:VGNC Symbol;Acc:VGNC:59357]	PLEKHA6	-1.1019	6.86765	0.0828615	0.55902
ENSBTAG00000015345	BCL2 interacting protein like [Source:VGNC Symbol;Acc:VGNC:26535]	BNIPL	1.25293	0.0751481	0.082908	0.559049
ENSBTAG00000007596	GTP binding protein overexpressed in skeletal muscle [Source:VGNC Symbol;Acc:VGNC:29315]	GEM	-1.1779	5.92636	0.0830284	0.559541
ENSBTAG00000025263	#NA	#NA	1.38051	-0.437941	0.0830654	0.559541
ENSBTAG00000053296	egl-9 family hypoxia inducible factor 1 [Source:NCBI gene (formerly Entrezgene);Acc:534075]	EGLN1	1.151	7.0959	0.0832075	0.560213
ENSBTAG00000018829	SPRY domain containing 7 [Source:VGNC Symbol;Acc:VGNC:35247]	SPRYD7	1.22272	5.78429	0.0833418	0.560833
ENSBTAG00000049233	transmembrane protein 123 [Source:NCBI gene (formerly Entrezgene);Acc:100300021]	0	-1.26023	5.83287	0.0835992	0.562279
ENSBTAG00000023731	melanocortin 1 receptor [Source:NCBI gene (formerly Entrezgene);Acc:281298]	MC1R	1.56793	0.509029	0.0836825	0.562554
ENSBTAG00000039888	MAGE family member D2 [Source:VGNC Symbol;Acc:VGNC:56926]	MAGED2	-1.12288	7.38654	0.0840566	0.564782
ENSBTAG00000015217	distal-less homeobox 1 [Source:VGNC Symbol;Acc:VGNC:28098]	DLX1	-1.11091	4.04178	0.0843027	0.566148
ENSBTAG00000006507	ADAM metallopeptidase with thrombospondin type 1 motif 3 [Source:VGNC Symbol;Acc:VGNC:25626]	ADAMTS3	-1.15382	4.35813	0.0844651	0.566951
ENSBTAG00000006173	coiled-coil domain containing 116 [Source:VGNC Symbol;Acc:VGNC:53895]	CCDC116	1.60197	0.325914	0.084713	0.568328
ENSBTAG00000033766	keratin 16 [Source:VGNC Symbol;Acc:VGNC:50397]	KRT16	1.34936	1.66508	0.0847845	0.56852
ENSBTAG00000054495	#NA	#NA	1.22335	2.21697	0.084829	0.56853
ENSBTAG00000005183	mevalonate kinase [Source:VGNC Symbol;Acc:VGNC:31768]	MVK	1.15562	5.80998	0.0850756	0.569895
ENSBTAG00000009020	cysteine rich transmembrane BMP regulator 1 [Source:VGNC Symbol;Acc:VGNC:27710]	CRIM1	1.08147	8.94359	0.0854496	0.571822
ENSBTAG00000008493	aquaporin 3 [Source:VGNC Symbol;Acc:VGNC:56935]	AQP3	1.47607	-0.658836	0.0854324	0.571822
ENSBTAG00000004342	coiled-coil domain containing 87 [Source:VGNC Symbol;Acc:VGNC:26926]	CCDC87	1.22208	1.03897	0.0855181	0.571991
ENSBTAG00000011647	solute carrier family 25 member 15 [Source:VGNC Symbol;Acc:VGNC:54486]	SLC25A15	1.09156	5.62142	0.0859097	0.57432
ENSBTAG00000010423	LIF receptor subunit alpha [Source:VGNC Symbol;Acc:VGNC:30881]	LIFR	-1.50271	-0.0320012	0.0860748	0.574555
ENSBTAG00000033563	zinc finger protein 529 [Source:HGNC Symbol;Acc:HGNC:29328]	ZNF529	1.24202	0.428485	0.0860694	0.574555
ENSBTAG00000052822	chromosome 3 C1orf162 homolog [Source:NCBI gene (formerly Entrezgene);Acc:100296588]	0	1.51945	-0.831106	0.0860676	0.574555
ENSBTAG00000002853	histidine rich calcium binding protein [Source:VGNC Symbol;Acc:VGNC:29952]	HRC	1.23314	1.14442	0.0864716	0.576913
ENSBTAG00000009124	fasciculation and elongation protein zeta 1 [Source:VGNC Symbol;Acc:VGNC:28957]	FEZ1	-1.10106	4.98815	0.0865329	0.577031
ENSBTAG00000006910	asparaginase and isoaspartyl peptidase 1 [Source:VGNC Symbol;Acc:VGNC:26223]	ASRGL1	1.09321	8.57537	0.0869683	0.579643
ENSBTAG00000012210	complement C5 [Source:VGNC Symbol;Acc:VGNC:49997]	C5	-1.31991	0.791509	0.0870471	0.579876
ENSBTAG00000047319	#NA	#NA	-1.36322	4.2257	0.0873737	0.581468
ENSBTAG00000004896	actin binding LIM protein family member 3 [Source:VGNC Symbol;Acc:VGNC:25509]	ABLIM3	1.17629	3.47805	0.0873398	0.581468
ENSBTAG00000005129	centrosomal protein 55 [Source:VGNC Symbol;Acc:VGNC:27206]	CEP55	1.2425	6.83522	0.087688	0.583073
ENSBTAG00000014100	BAI1 associated protein 3 [Source:VGNC Symbol;Acc:VGNC:26415]	BAIAP3	1.26334	2.23843	0.0877029	0.583073
ENSBTAG00000005769	nephrocystin 3 [Source:VGNC Symbol;Acc:VGNC:32202]	NPHP3	-1.18799	3.31731	0.0881959	0.586056
ENSBTAG00000026394	UBA like domain containing 1 [Source:VGNC Symbol;Acc:VGNC:36569]	UBALD1	1.09554	5.39499	0.0883751	0.586952
ENSBTAG00000055267	#NA	#NA	1.31022	-0.301779	0.0884393	0.587085
ENSBTAG00000055143	#NA	#NA	-1.28125	-0.948292	0.089123	0.591031
ENSBTAG00000034659	ubiquitin domain containing 2 [Source:VGNC Symbol;Acc:VGNC:36621]	UBTD2	-1.17867	3.39952	0.0891011	0.591031
[truncated: 11,252 more rows]

## Sheet: QUE+AFB1 vs AFB1
Table S2. Differential expression analysis. The table reports the EdgeR glmTreat output for the test performed (“QUE+AFB1 vs AFB1”). Ensembl gene ID, gene description, gene name, log2 fold change (logFC), mean log count per millions (logCPM), nominal p-value and false discovery rate (FDR) are reported for all the genes evaluated. Genes significantly (FDR ≤ 0.05; logFC ≥ 1) upregulated by QUE trea…
Gene ID	Gene description	Gene name	logFC	logCPM	p-value	FDR
ENSBTAG00000006771	FRY microtubule binding protein [Source:VGNC Symbol;Acc:VGNC:29122]	FRY	3.24232	7.50325	2.04114e-11	5.40902e-08
ENSBTAG00000015487	lysine demethylase 4B [Source:VGNC Symbol;Acc:VGNC:30528]	KDM4B	3.40854	5.84048	2.00186e-11	5.40902e-08
ENSBTAG00000014112	exocyst complex component 4 [Source:VGNC Symbol;Acc:VGNC:28648]	EXOC4	4.77337	5.59676	2.70414e-11	5.97165e-08
ENSBTAG00000005021	semaphorin 5A [Source:VGNC Symbol;Acc:VGNC:34439]	SEMA5A	3.55631	7.7083	4.97567e-11	8.0243e-08
ENSBTAG00000007273	transferrin [Source:NCBI gene (formerly Entrezgene);Acc:280705]	TF	5.12901	5.99677	5.45047e-11	8.0243e-08
ENSBTAG00000055207	stearoyl-CoA desaturase [Source:NCBI gene (formerly Entrezgene);Acc:280924]	SCD	3.74501	11.1567	4.27091e-11	8.0243e-08
ENSBTAG00000011420	carbonic anhydrase 9 [Source:VGNC Symbol;Acc:VGNC:26659]	CA9	4.60067	7.37469	1.16178e-10	1.39942e-07
ENSBTAG00000021953	LARGE xylosyl- and glucuronyltransferase 1 [Source:VGNC Symbol;Acc:VGNC:54444]	LARGE1	3.51145	5.88446	1.34977e-10	1.49037e-07
ENSBTAG00000006187	microfibril associated protein 4 [Source:VGNC Symbol;Acc:VGNC:31424]	MFAP4	4.01737	8.2931	2.17428e-10	1.80057e-07
ENSBTAG00000011538	kinesin family member 1A [Source:VGNC Symbol;Acc:VGNC:30590]	KIF1A	3.51445	6.34901	3.13137e-10	2.44062e-07
ENSBTAG00000015505	fatty acid desaturase 2 [Source:VGNC Symbol;Acc:VGNC:28702]	FADS2	3.61593	7.47352	4.8486e-10	3.35446e-07
ENSBTAG00000010517	envoplakin [Source:VGNC Symbol;Acc:VGNC:55823]	EVPL	2.78151	6.54903	5.52675e-10	3.48711e-07
ENSBTAG00000000066	leucine rich repeat neuronal 4 [Source:VGNC Symbol;Acc:VGNC:31041]	LRRN4	2.76752	10.3812	6.13924e-10	3.69749e-07
ENSBTAG00000007431	cell migration inducing hyaluronidase 1 [Source:VGNC Symbol;Acc:VGNC:27172]	CEMIP	3.60455	6.21518	6.85673e-10	3.95007e-07
ENSBTAG00000006546	glutathione S-transferase alpha 2 [Source:NCBI gene (formerly Entrezgene);Acc:281805]	GSTA2	4.95862	3.98168	8.32989e-10	4.51695e-07
ENSBTAG00000013303	stearoyl-CoA desaturase [Source:NCBI gene (formerly Entrezgene);Acc:280924]	ACSS2	3.90118	7.60735	8.52254e-10	4.51695e-07
ENSBTAG00000017461	solute carrier family 16 member 3 [Source:VGNC Symbol;Acc:VGNC:34689]	SLC16A3	4.55205	5.76217	8.91913e-10	4.54532e-07
ENSBTAG00000021527	insulin like growth factor 1 receptor [Source:VGNC Symbol;Acc:VGNC:30077]	IGF1R	2.98553	7.68397	1.06085e-09	4.84698e-07
ENSBTAG00000037673	glutathione S-transferase mu 1 [Source:NCBI gene (formerly Entrezgene);Acc:783879]	GSTM1	3.00862	3.70398	1.11023e-09	4.90351e-07
ENSBTAG00000001592	insulin induced gene 1 [Source:VGNC Symbol;Acc:VGNC:30217]	INSIG1	4.26482	7.45403	1.5714e-09	6.56487e-07
ENSBTAG00000010128	nucleosome assembly protein 1 like 5 [Source:VGNC Symbol;Acc:VGNC:31880]	NAP1L5	4.09768	4.76516	1.69541e-09	6.80734e-07
ENSBTAG00000020700	chloride voltage-gated channel 6 [Source:VGNC Symbol;Acc:VGNC:27400]	CLCN6	3.29948	6.67646	1.86388e-09	7.26365e-07
ENSBTAG00000010244	chloride intracellular channel 5 [Source:NCBI gene (formerly Entrezgene);Acc:281696]	CLIC5	5.12908	4.52873	2.76155e-09	1.04544e-06
ENSBTAG00000008301	WNK lysine deficient protein kinase 2 [Source:VGNC Symbol;Acc:VGNC:36950]	WNK2	3.10866	6.92231	2.88217e-09	1.0608e-06
ENSBTAG00000001068	zinc finger CW-type and PWWP domain containing 1 [Source:VGNC Symbol;Acc:VGNC:37125]	ZCWPW1	5.22834	4.34871	2.96794e-09	1.06284e-06
ENSBTAG00000052866	T-lymphocyte surface antigen Ly-9 [Source:NCBI gene (formerly Entrezgene);Acc:784007]	0	3.33388	5.70467	3.26938e-09	1.13998e-06
ENSBTAG00000012432	farnesyl-diphosphate farnesyltransferase 1 [Source:VGNC Symbol;Acc:VGNC:56966]	FDFT1	3.00713	7.90767	3.71459e-09	1.23046e-06
ENSBTAG00000001173	plexin A2 [Source:VGNC Symbol;Acc:VGNC:58398]	PLXNA2	2.62174	7.78869	3.92944e-09	1.26988e-06
ENSBTAG00000003610	DENN domain containing 1A [Source:VGNC Symbol;Acc:VGNC:27993]	DENND1A	2.35666	5.94786	4.0526e-09	1.27314e-06
ENSBTAG00000020312	nuclear receptor coactivator 2 [Source:VGNC Symbol;Acc:VGNC:50226]	NCOA2	2.95711	5.42886	4.92723e-09	1.4508e-06
ENSBTAG00000017490	phospholipase D1 [Source:VGNC Symbol;Acc:VGNC:50244]	PLD1	3.66657	6.27953	6.62913e-09	1.75672e-06
ENSBTAG00000002922	GRB2 associated binding protein 2 [Source:NCBI gene (formerly Entrezgene);Acc:529346]	GAB2	2.8616	5.94361	6.97895e-09	1.81316e-06
ENSBTAG00000013099	aldolase, fructose-bisphosphate C [Source:VGNC Symbol;Acc:VGNC:25823]	ALDOC	3.18017	5.24097	7.32164e-09	1.83297e-06
ENSBTAG00000007689	lipin 1 [Source:VGNC Symbol;Acc:VGNC:30966]	LPIN1	4.12313	5.46593	7.94115e-09	1.83351e-06
ENSBTAG00000012991	prune homolog 2 with BCH domain [Source:VGNC Symbol;Acc:VGNC:33429]	PRUNE2	6.64389	3.73052	8.01361e-09	1.83351e-06
ENSBTAG00000025099	ring finger protein 145 [Source:VGNC Symbol;Acc:VGNC:34028]	RNF145	2.19226	8.65441	9.02695e-09	2.02724e-06
ENSBTAG00000006262	LIM zinc finger domain containing 2 [Source:VGNC Symbol;Acc:VGNC:30891]	LIMS2	3.34169	5.67304	9.40122e-09	2.0761e-06
ENSBTAG00000014835	secreted protein acidic and cysteine rich [Source:VGNC Symbol;Acc:VGNC:35171]	SPARC	2.36367	12.4173	9.73004e-09	2.11349e-06
ENSBTAG00000009830	pleckstrin homology domain containing B1 [Source:VGNC Symbol;Acc:VGNC:33009]	PLEKHB1	2.78662	4.07602	1.03438e-08	2.17259e-06
ENSBTAG00000040477	chromodomain helicase DNA binding protein 5 [Source:VGNC Symbol;Acc:VGNC:59327]	CHD5	4.00687	4.51099	1.0658e-08	2.17259e-06
ENSBTAG00000013856	single stranded DNA binding protein 2 [Source:VGNC Symbol;Acc:VGNC:50023]	SSBP2	3.15211	5.16064	1.20184e-08	2.35426e-06
ENSBTAG00000015980	fatty acid synthase [Source:VGNC Symbol;Acc:VGNC:28871]	FASN	2.56772	10.7018	1.20168e-08	2.35426e-06
ENSBTAG00000014265	sterol regulatory element binding transcription factor 2 [Source:VGNC Symbol;Acc:VGNC:35275]	SREBF2	2.49475	9.06409	1.29398e-08	2.41481e-06
ENSBTAG00000000939	kinesin family member 16B [Source:VGNC Symbol;Acc:VGNC:30585]	KIF16B	2.42392	5.14328	1.37112e-08	2.45505e-06
ENSBTAG00000004231	glycoprotein M6A [Source:VGNC Symbol;Acc:VGNC:97275]	GPM6A	3.43848	8.03951	1.34314e-08	2.45505e-06
ENSBTAG00000009065	mitogen-activated protein kinase kinase kinase 5 [Source:VGNC Symbol;Acc:VGNC:31198]	MAP3K5	2.98444	5.79633	1.36933e-08	2.45505e-06
ENSBTAG00000015311	protein tyrosine phosphatase receptor type R [Source:VGNC Symbol;Acc:VGNC:33557]	PTPRR	4.50957	5.93199	1.48787e-08	2.59399e-06
ENSBTAG00000008428	uridine phosphorylase 1 [Source:VGNC Symbol;Acc:VGNC:36688]	UPP1	5.09641	3.85905	1.57188e-08	2.69547e-06
ENSBTAG00000026371	sorting nexin 29 [Source:VGNC Symbol;Acc:VGNC:35106]	SNX29	3.4376	3.76715	1.58677e-08	2.69547e-06
ENSBTAG00000006392	tetratricopeptide repeat domain 7B [Source:VGNC Symbol;Acc:VGNC:36481]	TTC7B	2.4713	3.85887	1.61652e-08	2.71126e-06
ENSBTAG00000019818	castor zinc finger 1 [Source:VGNC Symbol;Acc:VGNC:50113]	CASZ1	4.67814	1.57236	1.65755e-08	2.74532e-06
ENSBTAG00000030581	TBC1 domain family member 5 [Source:VGNC Symbol;Acc:VGNC:53608]	TBC1D5	4.54539	4.80815	1.71127e-08	2.76516e-06
ENSBTAG00000030775	poly(rC) binding protein 3 [Source:VGNC Symbol;Acc:VGNC:53597]	PCBP3	3.07786	3.91729	1.69082e-08	2.76516e-06
ENSBTAG00000000177	mesothelin [Source:NCBI gene (formerly Entrezgene);Acc:516237]	MSLN	3.45266	9.25135	1.93614e-08	2.983e-06
ENSBTAG00000008893	anoctamin 10 [Source:VGNC Symbol;Acc:VGNC:54405]	ANO10	3.02004	3.63783	1.91942e-08	2.983e-06
ENSBTAG00000054287	C1q and TNF related 2 [Source:NCBI gene (formerly Entrezgene);Acc:539842]	C1QTNF2	5.12967	3.82707	1.92642e-08	2.983e-06
ENSBTAG00000000743	#NA	#NA	9.28094	3.14632	2.07485e-08	3.15997e-06
ENSBTAG00000007998	transmembrane and coiled-coil domains 4 [Source:VGNC Symbol;Acc:VGNC:35931]	TMCO4	3.3324	3.83673	2.11274e-08	3.18111e-06
ENSBTAG00000004277	EvC ciliary complex subunit 2 [Source:VGNC Symbol;Acc:VGNC:28635]	EVC2	3.25084	5.07382	2.14976e-08	3.20049e-06
ENSBTAG00000005514	trio Rho guanine nucleotide exchange factor [Source:VGNC Symbol;Acc:VGNC:36356]	TRIO	1.93875	8.11832	2.33662e-08	3.44002e-06
ENSBTAG00000000536	zinc finger protein 395 [Source:VGNC Symbol;Acc:VGNC:37266]	ZNF395	2.85341	6.59801	2.50463e-08	3.56842e-06
ENSBTAG00000015716	endoplasmic reticulum oxidoreductase 1 alpha [Source:VGNC Symbol;Acc:VGNC:28594]	ERO1A	2.78641	8.07923	2.49266e-08	3.56842e-06
ENSBTAG00000033747	SIL1 nucleotide exchange factor [Source:VGNC Symbol;Acc:VGNC:34622]	SIL1	2.85902	4.84078	2.49831e-08	3.56842e-06
ENSBTAG00000008575	cingulin like 1 [Source:VGNC Symbol;Acc:VGNC:27259]	CGNL1	3.63265	4.48453	2.59322e-08	3.61688e-06
ENSBTAG00000021183	mitogen-activated protein kinase kinase kinase 21 [Source:VGNC Symbol;Acc:VGNC:55989]	MAP3K21	2.28664	7.13288	2.59324e-08	3.61688e-06
ENSBTAG00000000625	SMAD family member 6 [Source:VGNC Symbol;Acc:VGNC:34979]	SMAD6	2.79801	6.35504	2.67909e-08	3.65958e-06
ENSBTAG00000018373	dihydropyrimidinase like 2 [Source:VGNC Symbol;Acc:VGNC:28195]	DPYSL2	2.47969	9.03112	2.6548e-08	3.65958e-06
ENSBTAG00000032642	#NA	#NA	8.02567	2.00123	2.9508e-08	3.9896e-06
ENSBTAG00000007881	interferon-induced protein with tetratricopeptide repeats 1 [Source:NCBI gene (formerly Entrezgene);Acc:100139670]	IFIT1	2.8369	4.12607	3.04645e-08	4.07731e-06
ENSBTAG00000013066	insulin like growth factor 2 [Source:VGNC Symbol;Acc:VGNC:30078]	IGF2	2.01927	12.0561	3.1332e-08	4.13561e-06
ENSBTAG00000007305	VPS41 subunit of HOPS complex [Source:VGNC Symbol;Acc:VGNC:36823]	VPS41	2.4232	6.08217	3.39472e-08	4.40814e-06
ENSBTAG00000009907	mitogen-activated protein kinase 4 [Source:VGNC Symbol;Acc:VGNC:31220]	MAPK4	4.10875	4.4194	3.4267e-08	4.40814e-06
ENSBTAG00000011839	3-hydroxy-3-methylglutaryl-CoA synthase 1 [Source:VGNC Symbol;Acc:VGNC:29880]	HMGCS1	5.35086	10.8173	3.46406e-08	4.41335e-06
ENSBTAG00000050000	#NA	#NA	6.01694	5.28551	3.79659e-08	4.79094e-06
ENSBTAG00000004459	transmembrane protein 45A [Source:NCBI gene (formerly Entrezgene);Acc:509461]	TMEM45A	3.42868	5.27162	4.35852e-08	5.2982e-06
ENSBTAG00000005903	LDL receptor related protein 5 [Source:VGNC Symbol;Acc:VGNC:97281]	LRP5	2.47803	5.37009	4.44701e-08	5.35662e-06
ENSBTAG00000010620	ATPase H+ transporting V1 subunit B1 [Source:VGNC Symbol;Acc:VGNC:26317]	ATP6V1B1	3.42048	5.45674	4.52204e-08	5.39793e-06
ENSBTAG00000016465	7-dehydrocholesterol reductase [Source:VGNC Symbol;Acc:VGNC:28034]	DHCR7	3.02243	8.55579	4.59993e-08	5.44189e-06
ENSBTAG00000001219	#NA	#NA	3.38832	2.76441	4.72161e-08	5.53238e-06
ENSBTAG00000047650	neurexophilin 4 [Source:VGNC Symbol;Acc:VGNC:32383]	NXPH4	3.19859	3.89956	4.80169e-08	5.53238e-06
ENSBTAG00000001823	stanniocalcin 2 [Source:VGNC Symbol;Acc:VGNC:35378]	STC2	4.01252	5.32704	5.15424e-08	5.83707e-06
ENSBTAG00000021430	uroplakin 3B [Source:NCBI gene (formerly Entrezgene);Acc:282115]	UPK3B	4.21604	6.66475	5.12687e-08	5.83707e-06
ENSBTAG00000000599	cyclin I [Source:VGNC Symbol;Acc:VGNC:26971]	CCNI	2.02874	7.99564	5.34491e-08	5.97216e-06
ENSBTAG00000031886	H2B clustered histone 15 [Source:VGNC Symbol;Acc:VGNC:83587]	H2BC15	2.87201	5.10137	5.39462e-08	5.97216e-06
ENSBTAG00000019455	myosin VB [Source:VGNC Symbol;Acc:VGNC:31827]	MYO5B	2.25278	4.9589	5.51115e-08	5.98719e-06
ENSBTAG00000026842	zinc finger RANBP2-type containing 3 [Source:VGNC Symbol;Acc:VGNC:37373]	ZRANB3	2.97758	4.33475	5.51273e-08	5.98719e-06
ENSBTAG00000004556	solute carrier family 2 member 3 [Source:NCBI gene (formerly Entrezgene);Acc:282358]	SLC2A3	2.76551	9.94657	5.67659e-08	6.11502e-06
ENSBTAG00000017804	BCL2 interacting protein 3 [Source:VGNC Symbol;Acc:VGNC:26533]	BNIP3	3.67193	7.7623	6.00373e-08	6.36395e-06
ENSBTAG00000007878	Rho GTPase activating protein 22 [Source:VGNC Symbol;Acc:VGNC:26081]	ARHGAP22	3.45128	3.45563	6.11263e-08	6.37735e-06
ENSBTAG00000002485	tensin 1 [Source:VGNC Symbol;Acc:VGNC:36207]	TNS1	2.07744	9.64242	6.35856e-08	6.41008e-06
ENSBTAG00000006532	CDK5 regulatory subunit associated protein 2 [Source:VGNC Symbol;Acc:VGNC:27131]	CDK5RAP2	2.22563	6.33848	6.31846e-08	6.41008e-06
ENSBTAG00000055183	histidine rich carboxyl terminus 1 [Source:NCBI gene (formerly Entrezgene);Acc:100847747]	HRCT1	2.99972	4.56393	6.30394e-08	6.41008e-06
ENSBTAG00000019839	latent transforming growth factor beta binding protein 1 [Source:VGNC Symbol;Acc:VGNC:31071]	LTBP1	4.49879	2.89255	6.51617e-08	6.49167e-06
ENSBTAG00000009412	sialic acid acetylesterase [Source:VGNC Symbol;Acc:VGNC:34613]	SIAE	3.0614	3.60233	6.78797e-08	6.69275e-06
ENSBTAG00000050426	multivesicular body subunit 12B [Source:VGNC Symbol;Acc:VGNC:102829]	MVB12B	2.63346	3.9125	6.81903e-08	6.69275e-06
ENSBTAG00000000711	N-myc downstream regulated 1 [Source:VGNC Symbol;Acc:VGNC:53868]	NDRG1	2.60397	8.92717	7.03372e-08	6.80268e-06
ENSBTAG00000013801	PBX homeobox 1 [Source:VGNC Symbol;Acc:VGNC:32607]	PBX1	3.47009	4.92231	7.00607e-08	6.80268e-06
ENSBTAG00000023259	oxysterol binding protein like 1A [Source:VGNC Symbol;Acc:VGNC:32460]	OSBPL1A	2.28998	4.6107	7.30963e-08	6.96781e-06
ENSBTAG00000002402	insulin like growth factor 2 receptor [Source:VGNC Symbol;Acc:VGNC:30082]	IGF2R	2.46102	9.75664	7.85283e-08	7.43215e-06
ENSBTAG00000009806	inversin [Source:VGNC Symbol;Acc:VGNC:30236]	INVS	1.95104	5.77139	8.12446e-08	7.52791e-06
ENSBTAG00000010293	par-3 family cell polarity regulator beta [Source:NCBI gene (formerly Entrezgene);Acc:535378]	PARD3B	4.80709	3.59925	8.1159e-08	7.52791e-06
ENSBTAG00000019313	zinc finger MIZ-type containing 1 [Source:VGNC Symbol;Acc:VGNC:37195]	ZMIZ1	2.68013	7.27312	8.05113e-08	7.52791e-06
ENSBTAG00000015527	myosin ID [Source:VGNC Symbol;Acc:VGNC:31819]	MYO1D	2.16928	8.53403	8.20468e-08	7.54945e-06
ENSBTAG00000020799	exocyst complex component 6B [Source:VGNC Symbol;Acc:VGNC:28651]	EXOC6B	2.63472	4.56115	8.40359e-08	7.67914e-06
ENSBTAG00000005482	transmembrane protein 135 [Source:VGNC Symbol;Acc:VGNC:56288]	TMEM135	2.7877	5.02031	8.51423e-08	7.72695e-06
ENSBTAG00000007765	transcription factor CP2 like 1 [Source:VGNC Symbol;Acc:VGNC:35785]	TFCP2L1	2.5638	5.10082	8.67933e-08	7.82321e-06
ENSBTAG00000004885	discoidin domain receptor tyrosine kinase 2 [Source:VGNC Symbol;Acc:VGNC:27953]	DDR2	2.48872	4.41555	8.96927e-08	8.02992e-06
ENSBTAG00000012307	dystrobrevin alpha [Source:VGNC Symbol;Acc:VGNC:28231]	DTNA	4.8809	2.94118	9.09839e-08	8.03691e-06
ENSBTAG00000014564	xyloside xylosyltransferase 1 [Source:VGNC Symbol;Acc:VGNC:53613]	XXYLT1	2.39614	4.88171	9.05561e-08	8.03691e-06
ENSBTAG00000001335	growth hormone receptor [Source:VGNC Symbol;Acc:VGNC:50184]	GHR	3.11989	4.46931	9.45802e-08	8.24466e-06
ENSBTAG00000020614	protein kinase C epsilon [Source:VGNC Symbol;Acc:VGNC:33330]	PRKCE	3.43692	2.91455	1.00267e-07	8.68328e-06
ENSBTAG00000003068	methylsterol monooxygenase 1 [Source:VGNC Symbol;Acc:VGNC:31701]	MSMO1	3.4994	8.27035	1.02643e-07	8.83131e-06
ENSBTAG00000020644	glypican 4 [Source:VGNC Symbol;Acc:VGNC:29526]	GPC4	3.37015	2.47782	1.13198e-07	9.55333e-06
ENSBTAG00000001124	galactosylceramidase [Source:VGNC Symbol;Acc:VGNC:29217]	GALC	2.41126	4.29731	1.17756e-07	9.87511e-06
ENSBTAG00000008739	sterile alpha motif domain containing 11 [Source:VGNC Symbol;Acc:VGNC:59361]	SAMD11	3.08382	3.1419	1.23645e-07	1.03037e-05
ENSBTAG00000021764	glycine receptor beta [Source:VGNC Symbol;Acc:VGNC:29415]	GLRB	3.31846	1.78879	1.29293e-07	1.06406e-05
ENSBTAG00000039819	rabphilin 3A like (without C2 domains) [Source:NCBI gene (formerly Entrezgene);Acc:617294]	RPH3AL	4.2796	2.34629	1.36116e-07	1.11329e-05
ENSBTAG00000004249	tetratricopeptide repeat, ankyrin repeat and coiled-coil containing 2 [Source:VGNC Symbol;Acc:VGNC:35592]	TANC2	2.98224	4.32877	1.38855e-07	1.12185e-05
ENSBTAG00000005827	FIG4 phosphoinositide 5-phosphatase [Source:VGNC Symbol;Acc:VGNC:29008]	FIG4	2.41331	4.45623	1.38318e-07	1.12185e-05
ENSBTAG00000001444	tenascin XB [Source:VGNC Symbol;Acc:VGNC:36211]	TNXB	2.93617	7.81028	1.44017e-07	1.1565e-05
ENSBTAG00000013557	endoplasmic reticulum aminopeptidase 1 [Source:VGNC Symbol;Acc:VGNC:28560]	ERAP1	2.90797	5.00881	1.46803e-07	1.16406e-05
ENSBTAG00000020049	#NA	#NA	6.52863	0.591894	1.46938e-07	1.16406e-05
ENSBTAG00000053833	#NA	#NA	5.58179	2.67194	1.5861e-07	1.21479e-05
ENSBTAG00000004078	potassium voltage-gated channel subfamily H member 2 [Source:VGNC Symbol;Acc:VGNC:96697]	KCNH2	2.85267	4.55096	1.64089e-07	1.24239e-05
ENSBTAG00000031335	BRISC and BRCA1 A complex member 2 [Source:VGNC Symbol;Acc:VGNC:26399]	BABAM2	2.72546	5.04233	1.63682e-07	1.24239e-05
ENSBTAG00000004895	actin filament associated protein 1 like 2 [Source:VGNC Symbol;Acc:VGNC:25708]	AFAP1L2	2.35237	5.67615	1.80789e-07	1.29888e-05
ENSBTAG00000008389	HtrA serine peptidase 1 [Source:VGNC Symbol;Acc:VGNC:30004]	HTRA1	2.50467	8.5788	1.77383e-07	1.29888e-05
ENSBTAG00000016943	NIMA related kinase 7 [Source:VGNC Symbol;Acc:VGNC:31998]	NEK7	2.00629	6.98214	1.8126e-07	1.29888e-05
ENSBTAG00000021013	tubulin beta 4A class IVa [Source:VGNC Symbol;Acc:VGNC:36507]	TUBB4A	2.68211	5.45909	1.81354e-07	1.29888e-05
ENSBTAG00000023963	rhomboid domain containing 1 [Source:VGNC Symbol;Acc:VGNC:33930]	RHBDD1	2.54097	3.19653	1.80232e-07	1.29888e-05
ENSBTAG00000046684	forkhead box N3 [Source:VGNC Symbol;Acc:VGNC:55115]	FOXN3	2.63442	6.65832	1.77661e-07	1.29888e-05
ENSBTAG00000010452	podocalyxin like [Source:VGNC Symbol;Acc:VGNC:53665]	PODXL	2.11757	10.1305	1.84358e-07	1.31331e-05
ENSBTAG00000018901	cap binding complex dependent translation initiation factor [Source:VGNC Symbol;Acc:VGNC:27797]	CTIF	2.53781	5.13432	1.86688e-07	1.31575e-05
ENSBTAG00000047664	G protein subunit alpha z [Source:VGNC Symbol;Acc:VGNC:58379]	GNAZ	2.6402	3.85792	1.86387e-07	1.31575e-05
ENSBTAG00000048906	AHNAK nucleoprotein 2 [Source:NCBI gene (formerly Entrezgene);Acc:527701]	AHNAK2	2.68693	5.728	2.01078e-07	1.40816e-05
ENSBTAG00000007840	3-hydroxy-3-methylglutaryl-CoA reductase [Source:VGNC Symbol;Acc:VGNC:29879]	HMGCR	2.86131	8.90041	2.14391e-07	1.47972e-05
ENSBTAG00000021911	protein tyrosine phosphatase receptor type G [Source:VGNC Symbol;Acc:VGNC:33551]	PTPRG	3.13236	4.81055	2.20446e-07	1.4979e-05
ENSBTAG00000030669	FGGY carbohydrate kinase domain containing [Source:VGNC Symbol;Acc:VGNC:28991]	FGGY	3.56778	1.93845	2.24898e-07	1.52036e-05
ENSBTAG00000008650	calcium/calmodulin dependent protein kinase ID [Source:VGNC Symbol;Acc:VGNC:58595]	CAMK1D	2.96303	3.64964	2.30856e-07	1.54487e-05
ENSBTAG00000019781	cytoplasmic linker associated protein 1 [Source:VGNC Symbol;Acc:VGNC:27389]	CLASP1	2.01325	6.93239	2.3615e-07	1.5645e-05
ENSBTAG00000050790	chromosome 3 C1orf226 homolog [Source:NCBI gene (formerly Entrezgene);Acc:783439]	C3H1orf226	2.3464	4.97766	2.34988e-07	1.5645e-05
ENSBTAG00000000604	glycoprotein nmb [Source:VGNC Symbol;Acc:VGNC:29541]	GPNMB	6.83652	1.4254	2.47234e-07	1.62978e-05
ENSBTAG00000015805	signal induced proliferation associated 1 like 1 [Source:VGNC Symbol;Acc:VGNC:34628]	SIPA1L1	1.97257	6.98686	2.49816e-07	1.63865e-05
ENSBTAG00000019834	ADP ribosylation factor like GTPase 15 [Source:HGNC Symbol;Acc:HGNC:25945]	ARL15	3.8245	2.07246	2.5426e-07	1.65144e-05
ENSBTAG00000012193	tetratricopeptide repeat domain 28 [Source:VGNC Symbol;Acc:VGNC:36467]	TTC28	2.08068	5.18282	2.56722e-07	1.6593e-05
ENSBTAG00000031503	NDUFA4 mitochondrial complex associated like 2 [Source:VGNC Symbol;Acc:VGNC:31948]	NDUFA4L2	5.49906	3.3996	2.6751e-07	1.71232e-05
ENSBTAG00000007830	pleckstrin homology domain containing M3 [Source:VGNC Symbol;Acc:VGNC:54470]	PLEKHM3	3.47736	1.86612	2.81216e-07	1.76228e-05
ENSBTAG00000030599	SPARC related modular calcium binding 1 [Source:VGNC Symbol;Acc:VGNC:35026]	SMOC1	2.99829	4.818	2.86744e-07	1.78374e-05
ENSBTAG00000011677	H1.2 linker histone, cluster member [Source:VGNC Symbol;Acc:VGNC:83558]	H1-2	3.36104	3.80844	2.99455e-07	1.84548e-05
ENSBTAG00000012312	receptor tyrosine kinase like orphan receptor 1 [Source:VGNC Symbol;Acc:VGNC:55673]	ROR1	3.07892	3.78232	3.3543e-07	2.02021e-05
ENSBTAG00000013107	SH3 and multiple ankyrin repeat domains 1 [Source:VGNC Symbol;Acc:VGNC:34585]	SHANK1	2.77086	3.97201	3.57899e-07	2.12653e-05
ENSBTAG00000020638	TIMP metallopeptidase inhibitor 3 [Source:VGNC Symbol;Acc:VGNC:35872]	TIMP3	2.40963	8.08028	3.56703e-07	2.12653e-05
ENSBTAG00000013755	integrin subunit beta 5 [Source:VGNC Symbol;Acc:VGNC:30330]	ITGB5	2.27376	5.67774	3.74863e-07	2.21738e-05
ENSBTAG00000053347	#NA	#NA	7.32304	1.53555	3.77973e-07	2.22584e-05
ENSBTAG00000012219	chondroitin sulfate proteoglycan 4 [Source:VGNC Symbol;Acc:VGNC:57158]	CSPG4	2.88636	6.20647	3.79729e-07	2.22629e-05
ENSBTAG00000051466	unc-51 like kinase 4 [Source:NCBI gene (formerly Entrezgene);Acc:100336480]	ULK4	2.89575	3.50535	3.89937e-07	2.27606e-05
ENSBTAG00000006978	hydroxysteroid 17-beta dehydrogenase 4 [Source:VGNC Symbol;Acc:VGNC:29975]	HSD17B4	2.41382	6.74211	4.13877e-07	2.4052e-05
ENSBTAG00000005630	von Willebrand factor A domain containing 7 [Source:VGNC Symbol;Acc:VGNC:36855]	VWA7	2.34588	4.31284	4.1954e-07	2.42747e-05
ENSBTAG00000013127	lysophosphatidylcholine acyltransferase 3 [Source:VGNC Symbol;Acc:VGNC:30963]	LPCAT3	1.85085	7.0732	4.43772e-07	2.55651e-05
ENSBTAG00000008541	microsomal glutathione S-transferase 1 [Source:VGNC Symbol;Acc:VGNC:31451]	MGST1	3.20456	6.18954	4.59658e-07	2.6252e-05
ENSBTAG00000054745	#NA	#NA	2.45986	12.1477	4.65129e-07	2.64505e-05
ENSBTAG00000014920	semaphorin 3E [Source:VGNC Symbol;Acc:VGNC:34430]	SEMA3E	4.76202	3.37341	4.76285e-07	2.69691e-05
ENSBTAG00000006208	adenylate cyclase 7 [Source:VGNC Symbol;Acc:VGNC:25648]	ADCY7	2.11982	4.33312	5.30675e-07	2.95439e-05
ENSBTAG00000019592	methyl-CpG binding domain protein 5 [Source:VGNC Symbol;Acc:VGNC:31277]	MBD5	2.53001	4.67476	5.50834e-07	3.04106e-05
ENSBTAG00000010677	LIM and calponin homology domains 1 [Source:VGNC Symbol;Acc:VGNC:30887]	LIMCH1	2.81051	6.88364	5.56132e-07	3.05757e-05
ENSBTAG00000013290	dysferlin [Source:VGNC Symbol;Acc:VGNC:28282]	DYSF	2.92578	4.54749	5.62392e-07	3.0718e-05
ENSBTAG00000010082	collagen type XV alpha 1 chain [Source:VGNC Symbol;Acc:VGNC:27556]	COL15A1	3.26608	3.56706	5.67777e-07	3.08322e-05
ENSBTAG00000049487	#NA	#NA	6.50415	0.681372	5.81399e-07	3.11884e-05
ENSBTAG00000050386	O-6-methylguanine-DNA methyltransferase [Source:NCBI gene (formerly Entrezgene);Acc:616091]	MGMT	3.68212	3.03415	5.80555e-07	3.11884e-05
ENSBTAG00000000473	ATPase phospholipid transporting 10D (putative) [Source:VGNC Symbol;Acc:VGNC:55156]	ATP10D	3.00736	4.38185	6.01587e-07	3.18841e-05
ENSBTAG00000051621	SLX4 interacting protein [Source:VGNC Symbol;Acc:VGNC:57024]	SLX4IP	2.13134	4.60293	6.00927e-07	3.18841e-05
ENSBTAG00000020632	NAD(P)H quinone dehydrogenase 1 [Source:VGNC Symbol;Acc:VGNC:57053]	NQO1	2.55279	4.70738	6.08492e-07	3.21216e-05
ENSBTAG00000044121	nucleotide binding protein like [Source:VGNC Symbol;Acc:VGNC:32317]	NUBPL	3.33527	1.87686	6.22573e-07	3.26051e-05
ENSBTAG00000000656	nuclear factor of activated T cells 1 [Source:VGNC Symbol;Acc:VGNC:32030]	NFATC1	2.31606	5.18336	6.25916e-07	3.26511e-05
ENSBTAG00000031696	ankyrin repeat domain 44 [Source:VGNC Symbol;Acc:VGNC:55324]	ANKRD44	2.74176	4.31506	6.65099e-07	3.42901e-05
ENSBTAG00000002474	mitotic arrest deficient 1 like 1 [Source:VGNC Symbol;Acc:VGNC:31130]	MAD1L1	2.07003	4.52249	6.69394e-07	3.43524e-05
ENSBTAG00000009020	cysteine rich transmembrane BMP regulator 1 [Source:VGNC Symbol;Acc:VGNC:27710]	CRIM1	1.75488	8.94359	6.81926e-07	3.46373e-05
ENSBTAG00000013955	trafficking protein particle complex 9 [Source:VGNC Symbol;Acc:VGNC:36294]	TRAPPC9	2.87235	4.68077	6.82289e-07	3.46373e-05
ENSBTAG00000009477	pirin [Source:VGNC Symbol;Acc:VGNC:32915]	PIR	2.92787	4.01377	7.30048e-07	3.63801e-05
ENSBTAG00000010659	cut like homeobox 1 [Source:VGNC Symbol;Acc:VGNC:27839]	CUX1	2.17848	8.2743	7.33094e-07	3.63801e-05
ENSBTAG00000018164	fibronectin type III domain containing 4 [Source:VGNC Symbol;Acc:VGNC:29064]	FNDC4	2.92542	3.3258	7.27124e-07	3.63801e-05
ENSBTAG00000012433	DENN domain containing 1B [Source:NCBI gene (formerly Entrezgene);Acc:515939]	DENND1B	2.19266	4.53362	7.63019e-07	3.74671e-05
ENSBTAG00000019246	sterol-C5-desaturase [Source:VGNC Symbol;Acc:VGNC:34312]	SC5D	3.15159	8.18518	7.63481e-07	3.74671e-05
ENSBTAG00000047998	collagen type V alpha 1 chain [Source:VGNC Symbol;Acc:VGNC:58369]	COL5A1	2.27882	11.2081	7.60938e-07	3.74671e-05
ENSBTAG00000012855	lipoprotein lipase [Source:VGNC Symbol;Acc:VGNC:30969]	LPL	4.29719	3.52632	7.72669e-07	3.76392e-05
ENSBTAG00000016355	UV radiation resistance associated [Source:VGNC Symbol;Acc:VGNC:36751]	UVRAG	2.10952	4.82688	7.98109e-07	3.84544e-05
ENSBTAG00000024269	transforming growth factor beta receptor 3 [Source:VGNC Symbol;Acc:VGNC:49979]	TGFBR3	2.7225	5.04851	8.14537e-07	3.91037e-05
ENSBTAG00000018546	LPS responsive beige-like anchor protein [Source:VGNC Symbol;Acc:VGNC:30972]	LRBA	2.33419	4.89973	8.3983e-07	3.97419e-05
ENSBTAG00000043976	ring finger protein, transmembrane 2 [Source:VGNC Symbol;Acc:VGNC:34075]	RNFT2	2.25974	3.55013	8.37056e-07	3.97419e-05
ENSBTAG00000039319	cytochrome P450, family 4, subfamily F, polypeptide 2 [Source:NCBI gene (formerly Entrezgene);Acc:507615]	CYP4F2	4.33493	3.14128	8.45647e-07	3.98748e-05
ENSBTAG00000007244	nidogen 1 [Source:VGNC Symbol;Acc:VGNC:55991]	NID1	2.13705	6.9393	9.02535e-07	4.24064e-05
ENSBTAG00000009451	Jun dimerization protein 2 [Source:VGNC Symbol;Acc:VGNC:30374]	JDP2	2.25442	6.63477	9.19922e-07	4.30706e-05
ENSBTAG00000021217	collagen type XI alpha 1 chain [Source:VGNC Symbol;Acc:VGNC:50080]	COL11A1	2.06625	8.6396	9.31395e-07	4.34542e-05
ENSBTAG00000005498	squalene epoxidase [Source:VGNC Symbol;Acc:VGNC:35264]	SQLE	2.77675	9.04649	9.7143e-07	4.49101e-05
ENSBTAG00000020116	MHC Class I JSP.1 [Source:NCBI gene (formerly Entrezgene);Acc:407173]	JSP.1	1.8393	5.2477	9.70629e-07	4.49101e-05
ENSBTAG00000031461	sorting nexin 7 [Source:VGNC Symbol;Acc:VGNC:35113]	SNX7	3.02329	3.22472	9.75319e-07	4.49101e-05
ENSBTAG00000005339	vascular endothelial growth factor A [Source:VGNC Symbol;Acc:VGNC:55927]	VEGFA	2.05225	8.39117	1.00201e-06	4.54681e-05
ENSBTAG00000012938	jumonji and AT-rich interaction domain containing 2 [Source:VGNC Symbol;Acc:VGNC:30371]	JARID2	3.22544	2.07512	1.00099e-06	4.54681e-05
ENSBTAG00000013176	SPARC related modular calcium binding 2 [Source:VGNC Symbol;Acc:VGNC:35027]	SMOC2	3.33852	5.20349	9.96684e-07	4.54681e-05
ENSBTAG00000017165	matrilin 2 [Source:VGNC Symbol;Acc:VGNC:31265]	MATN2	2.84527	5.75609	1.01578e-06	4.59355e-05
ENSBTAG00000001224	ATPase phospholipid transporting 9B (putative) [Source:NCBI gene (formerly Entrezgene);Acc:510301]	ATP9B	2.18611	4.81339	1.0424e-06	4.6979e-05
ENSBTAG00000011307	dynamin 1 [Source:VGNC Symbol;Acc:VGNC:50145]	DNM1	2.89183	2.08151	1.06577e-06	4.78694e-05
ENSBTAG00000023795	VAC14 component of PIKFYVE complex [Source:VGNC Symbol;Acc:VGNC:36755]	VAC14	2.07859	6.02473	1.13348e-06	5.02294e-05
ENSBTAG00000021872	RAS guanyl releasing protein 1 [Source:VGNC Symbol;Acc:VGNC:33747]	RASGRP1	3.2789	2.35941	1.19657e-06	5.26729e-05
ENSBTAG00000003779	zinc finger C4H2-type containing [Source:VGNC Symbol;Acc:VGNC:37114]	ZC4H2	3.62488	1.66777	1.20615e-06	5.29188e-05
ENSBTAG00000018971	RAD51 paralog B [Source:VGNC Symbol;Acc:VGNC:33685]	RAD51B	2.73091	2.15893	1.22509e-06	5.33961e-05
ENSBTAG00000015766	zinc finger protein, FOG family member 1 [Source:VGNC Symbol;Acc:VGNC:58429]	ZFPM1	2.21848	5.8808	1.23449e-06	5.36295e-05
ENSBTAG00000018112	transducin beta like 1 X-linked [Source:NCBI gene (formerly Entrezgene);Acc:515972]	TBL1X	1.82946	7.87029	1.25463e-06	5.43264e-05
ENSBTAG00000017764	histone deacetylase 4 [Source:VGNC Symbol;Acc:VGNC:50611]	HDAC4	2.71468	3.94899	1.26746e-06	5.45253e-05
ENSBTAG00000009076	adducin 2 [Source:VGNC Symbol;Acc:VGNC:25654]	ADD2	2.89116	3.10603	1.33572e-06	5.7276e-05
ENSBTAG00000026461	calcium voltage-gated channel subunit alpha1 H [Source:VGNC Symbol;Acc:VGNC:26678]	CACNA1H	2.32938	6.2586	1.34505e-06	5.74901e-05
ENSBTAG00000032787	nuclear RNA export factor 3 [Source:NCBI gene (formerly Entrezgene);Acc:785244]	0	4.36457	1.76583	1.35958e-06	5.79243e-05
ENSBTAG00000000052	PBX/knotted 1 homeobox 2 [Source:VGNC Symbol;Acc:VGNC:32949]	PKNOX2	2.80511	4.06835	1.37152e-06	5.82456e-05
ENSBTAG00000004075	isopentenyl-diphosphate delta isomerase 1 [Source:NCBI gene (formerly Entrezgene);Acc:514293]	IDI1	3.34566	8.241	1.43557e-06	6.07708e-05
ENSBTAG00000009475	plexin domain containing 2 [Source:VGNC Symbol;Acc:VGNC:33058]	PLXDC2	3.03397	6.75557	1.47114e-06	6.18813e-05
ENSBTAG00000000920	dynein axonemal heavy chain 17 [Source:VGNC Symbol;Acc:VGNC:28124]	DNAH17	4.37456	1.48128	1.48553e-06	6.20923e-05
ENSBTAG00000013306	zinc finger and BTB domain containing 7C [Source:VGNC Symbol;Acc:VGNC:37091]	ZBTB7C	3.04498	4.73557	1.48337e-06	6.20923e-05
ENSBTAG00000001324	solute carrier organic anion transporter family member 2A1 [Source:VGNC Symbol;Acc:VGNC:34951]	SLCO2A1	4.10592	2.60042	1.53921e-06	6.39325e-05
ENSBTAG00000003217	cell adhesion molecule 3 [Source:VGNC Symbol;Acc:VGNC:26696]	CADM3	3.21919	3.40591	1.53475e-06	6.39325e-05
ENSBTAG00000031849	transmembrane protein 119 [Source:VGNC Symbol;Acc:VGNC:35955]	TMEM119	3.83022	3.17168	1.54886e-06	6.41323e-05
ENSBTAG00000012291	TBC1 domain family member 22A [Source:VGNC Symbol;Acc:VGNC:35636]	TBC1D22A	2.17051	4.10082	1.56128e-06	6.44453e-05
ENSBTAG00000011964	DIS3 like 3'-5' exoribonuclease 2 [Source:VGNC Symbol;Acc:VGNC:28074]	DIS3L2	2.45767	3.73287	1.59087e-06	6.52397e-05
ENSBTAG00000017834	proline and arginine rich end leucine rich repeat protein [Source:VGNC Symbol;Acc:VGNC:33309]	PRELP	2.71477	6.46767	1.59529e-06	6.52397e-05
ENSBTAG00000013391	ANKH inorganic pyrophosphate transport regulator [Source:VGNC Symbol;Acc:VGNC:25901]	ANKH	1.9109	6.91536	1.61711e-06	6.57262e-05
ENSBTAG00000007204	keratin 80 [Source:VGNC Symbol;Acc:VGNC:30742]	KRT80	2.49219	6.36432	1.65466e-06	6.70467e-05
ENSBTAG00000001139	acetylcholinesterase (Cartwright blood group) [Source:NCBI gene (formerly Entrezgene);Acc:540446]	ACHE	3.96328	4.41687	1.68453e-06	6.74319e-05
ENSBTAG00000014841	glucosylceramidase beta [Source:VGNC Symbol;Acc:VGNC:50183]	GBA	2.08832	6.33309	1.68108e-06	6.74319e-05
ENSBTAG00000047930	ubiquitin conjugating enzyme E2 E2 [Source:NCBI gene (formerly Entrezgene);Acc:784326]	UBE2E2	2.73215	2.74989	1.68078e-06	6.74319e-05
ENSBTAG00000003512	myosin heavy chain 7B [Source:VGNC Symbol;Acc:VGNC:50024]	MYH7B	3.23732	2.4347	1.70929e-06	6.80124e-05
ENSBTAG00000010716	Fraser extracellular matrix complex subunit 1 [Source:VGNC Symbol;Acc:VGNC:59334]	FRAS1	2.86296	5.76175	1.70504e-06	6.80124e-05
ENSBTAG00000045862	fermitin family member 3 [Source:NCBI gene (formerly Entrezgene);Acc:525159]	FERMT3	4.64107	2.34544	1.72135e-06	6.82872e-05
ENSBTAG00000011187	family with sequence similarity 13 member A [Source:VGNC Symbol;Acc:VGNC:28731]	FAM13A	2.44133	5.84577	1.73814e-06	6.87472e-05
ENSBTAG00000043971	notch receptor 3 [Source:VGNC Symbol;Acc:VGNC:32178]	NOTCH3	2.66838	5.65053	1.76229e-06	6.94951e-05
ENSBTAG00000037377	abhydrolase domain containing 14B [Source:VGNC Symbol;Acc:VGNC:25493]	ABHD14B	1.79008	7.09481	1.83162e-06	7.15899e-05
ENSBTAG00000006326	aldehyde dehydrogenase 1 family member L2 [Source:VGNC Symbol;Acc:VGNC:25812]	ALDH1L2	2.70093	5.5902	1.84214e-06	7.17893e-05
ENSBTAG00000014400	E2F transcription factor 2 [Source:VGNC Symbol;Acc:VGNC:54420]	E2F2	2.14723	5.41608	1.90035e-06	7.29932e-05
ENSBTAG00000017181	mono-ADP ribosylhydrolase 1 [Source:VGNC Symbol;Acc:VGNC:56272]	MACROD1	2.22228	3.9597	1.90609e-06	7.29932e-05
ENSBTAG00000020346	coiled-coil domain containing 92 [Source:VGNC Symbol;Acc:VGNC:26933]	CCDC92	2.30328	3.23268	1.88677e-06	7.29932e-05
ENSBTAG00000025403	tubulin tyrosine ligase like 5 [Source:VGNC Symbol;Acc:VGNC:36493]	TTLL5	2.63249	4.70309	1.96084e-06	7.46585e-05
ENSBTAG00000021487	circadian associated repressor of transcription [Source:VGNC Symbol;Acc:VGNC:27358]	CIART	2.9279	4.56475	1.9745e-06	7.47488e-05
ENSBTAG00000016294	zinc finger protein 438 [Source:VGNC Symbol;Acc:VGNC:37276]	ZNF438	2.7726	2.56767	2.00152e-06	7.53411e-05
ENSBTAG00000010692	staphylococcal nuclease and tudor domain containing 1 [Source:VGNC Symbol;Acc:VGNC:35063]	SND1	1.75739	7.6567	2.0534e-06	7.68573e-05
ENSBTAG00000017839	TIAM Rac1 associated GEF 1 [Source:VGNC Symbol;Acc:VGNC:56334]	TIAM1	4.17018	2.28046	2.05232e-06	7.68573e-05
ENSBTAG00000015905	Rho GTPase activating protein 32 [Source:VGNC Symbol;Acc:VGNC:26090]	ARHGAP32	1.78543	5.83583	2.09217e-06	7.78686e-05
ENSBTAG00000000727	ring finger protein 169 [Source:VGNC Symbol;Acc:VGNC:34034]	RNF169	2.46285	4.56974	2.12418e-06	7.83995e-05
ENSBTAG00000013960	phosphoserine aminotransferase 1 [Source:VGNC Symbol;Acc:VGNC:55075]	PSAT1	2.47279	6.05883	2.11955e-06	7.83995e-05
ENSBTAG00000010635	RAB3A, member RAS oncogene family [Source:VGNC Symbol;Acc:VGNC:33649]	RAB3A	2.54225	3.31706	2.18567e-06	8.02219e-05
ENSBTAG00000000120	ubiquitin specific peptidase 43 [Source:VGNC Symbol;Acc:VGNC:36730]	USP43	2.76008	4.14938	2.24104e-06	8.20271e-05
ENSBTAG00000002084	unc-5 netrin receptor C [Source:VGNC Symbol;Acc:VGNC:36672]	UNC5C	2.33588	6.91416	2.29422e-06	8.32625e-05
ENSBTAG00000000529	BTB domain containing 9 [Source:VGNC Symbol;Acc:VGNC:54397]	BTBD9	1.89359	4.55802	2.31673e-06	8.36423e-05
ENSBTAG00000005108	slit guidance ligand 2 [Source:VGNC Symbol;Acc:VGNC:34960]	SLIT2	2.79495	4.56631	2.38451e-06	8.53914e-05
ENSBTAG00000019806	yippee like 2 [Source:VGNC Symbol;Acc:VGNC:37035]	YPEL2	2.5593	3.89429	2.38084e-06	8.53914e-05
ENSBTAG00000000959	zinc finger SWIM-type containing 1 [Source:VGNC Symbol;Acc:VGNC:37381]	ZSWIM1	2.18232	3.19179	2.39106e-06	8.53951e-05
ENSBTAG00000002522	synaptotagmin 5 [Source:VGNC Symbol;Acc:VGNC:35544]	SYT5	2.59055	2.99978	2.40439e-06	8.56403e-05
ENSBTAG00000013048	NIPA like domain containing 3 [Source:VGNC Symbol;Acc:VGNC:32083]	NIPAL3	2.2836	3.93586	2.42888e-06	8.605e-05
ENSBTAG00000019644	exostosin glycosyltransferase 2 [Source:VGNC Symbol;Acc:VGNC:28666]	EXT2	1.75779	7.13031	2.4231e-06	8.605e-05
ENSBTAG00000022360	SRY-box transcription factor 5 [Source:VGNC Symbol;Acc:VGNC:35149]	SOX5	4.1539	3.42032	2.52707e-06	8.90522e-05
ENSBTAG00000007644	G protein subunit gamma 7 [Source:VGNC Symbol;Acc:VGNC:29468]	GNG7	3.23051	2.64012	2.56837e-06	8.95549e-05
ENSBTAG00000017537	prostaglandin I2 synthase [Source:VGNC Symbol;Acc:VGNC:33509]	PTGIS	3.0934	4.20033	2.56142e-06	8.95549e-05
ENSBTAG00000030885	scavenger receptor cysteine rich family member with 5 domains [Source:VGNC Symbol;Acc:VGNC:35310]	SSC5D	3.19696	3.11453	2.56548e-06	8.95549e-05
ENSBTAG00000001847	centlein [Source:VGNC Symbol;Acc:VGNC:56940]	CNTLN	3.01884	5.06391	2.63505e-06	9.16388e-05
ENSBTAG00000012809	PHD finger protein 24 [Source:VGNC Symbol;Acc:VGNC:32824]	PHF24	2.72444	3.74942	2.66518e-06	9.2088e-05
ENSBTAG00000027809	RAB GTPase activating protein 1-like [Source:NCBI gene (formerly Entrezgene);Acc:527428]	RABGAP1L	2.43174	2.93381	2.66881e-06	9.2088e-05
ENSBTAG00000008690	solute carrier family 6 member 9 [Source:NCBI gene (formerly Entrezgene);Acc:282368]	SLC6A9	2.33535	4.18561	2.73542e-06	9.23321e-05
ENSBTAG00000010498	solute carrier family 40 member 1 [Source:VGNC Symbol;Acc:VGNC:34872]	SLC40A1	2.47546	3.14622	2.71873e-06	9.23321e-05
ENSBTAG00000011246	forkhead box P2 [Source:VGNC Symbol;Acc:VGNC:53644]	FOXP2	3.63696	3.34429	2.7042e-06	9.23321e-05
ENSBTAG00000013439	Rho guanine nucleotide exchange factor 26 [Source:VGNC Symbol;Acc:VGNC:26113]	ARHGEF26	2.24133	3.62692	2.71564e-06	9.23321e-05
ENSBTAG00000017860	homeodomain interacting protein kinase 2 [Source:VGNC Symbol;Acc:VGNC:58380]	HIPK2	1.88364	5.83518	2.69135e-06	9.23321e-05
ENSBTAG00000032996	prolyl 4-hydroxylase subunit alpha 1 [Source:VGNC Symbol;Acc:VGNC:32535]	P4HA1	2.41813	8.27611	2.73575e-06	9.23321e-05
ENSBTAG00000039242	zinc finger protein 10 [Source:VGNC Symbol;Acc:VGNC:52850]	ZNF10	4.07762	2.01317	2.72735e-06	9.23321e-05
ENSBTAG00000045832	PH domain and leucine rich repeat protein phosphatase 1 [Source:VGNC Symbol;Acc:VGNC:32840]	PHLPP1	1.98626	4.35335	2.68905e-06	9.23321e-05
ENSBTAG00000012630	peptidase domain containing associated with muscle regeneration 1 [Source:VGNC Symbol;Acc:VGNC:32562]	PAMR1	3.25915	2.38478	2.89546e-06	9.73726e-05
ENSBTAG00000002663	BCAS3 microtubule associated cell migration factor [Source:VGNC Symbol;Acc:VGNC:26438]	BCAS3	2.75636	3.51394	3.08525e-06	0.000102971
ENSBTAG00000054953	#NA	#NA	3.1301	2.28207	3.14494e-06	0.0001047
ENSBTAG00000027151	Rho GTPase activating protein 26 [Source:VGNC Symbol;Acc:VGNC:26084]	ARHGAP26	4.27678	1.90043	3.16655e-06	0.000105155
ENSBTAG00000021182	dedicator of cytokinesis 4 [Source:VGNC Symbol;Acc:VGNC:28158]	DOCK4	2.46687	5.31527	3.21118e-06	0.00010637
ENSBTAG00000020468	mitochondrial calcium uptake family member 3 [Source:VGNC Symbol;Acc:VGNC:31463]	MICU3	3.37945	0.558249	3.23859e-06	0.000107011
ENSBTAG00000020626	ERCC excision repair 6 like 2 [Source:VGNC Symbol;Acc:VGNC:56964]	ERCC6L2	2.18082	5.33973	3.49343e-06	0.000114859
ENSBTAG00000039684	caveolae associated protein 1 [Source:VGNC Symbol;Acc:VGNC:26802]	CAVIN1	1.69453	10.7641	3.60792e-06	0.000118037
ENSBTAG00000006999	#NA	#NA	5.99658	0.997418	3.87325e-06	0.000125466
ENSBTAG00000012314	low density lipoprotein receptor [Source:VGNC Symbol;Acc:VGNC:55214]	LDLR	2.1909	9.67916	3.85437e-06	0.000125466
ENSBTAG00000045498	sulfotransferase family 2B member 1 [Source:VGNC Symbol;Acc:VGNC:35468]	SULT2B1	3.76079	1.30319	3.90628e-06	0.000125932
ENSBTAG00000017753	amyloid beta precursor protein [Source:VGNC Symbol;Acc:VGNC:26038]	APP	1.88474	10.28	4.17878e-06	0.000133419
ENSBTAG00000000838	coiled-coil domain containing 88C [Source:VGNC Symbol;Acc:VGNC:55038]	CCDC88C	1.8367	4.90365	4.21828e-06	0.000134034
ENSBTAG00000035437	stromal antigen 1 [Source:VGNC Symbol;Acc:VGNC:35353]	STAG1	2.9956	5.43864	4.21627e-06	0.000134034
ENSBTAG00000009037	polypeptide N-acetylgalactosaminyltransferase 12 [Source:VGNC Symbol;Acc:VGNC:29225]	GALNT12	2.14156	3.09465	4.26432e-06	0.000135173
ENSBTAG00000015115	acid phosphatase 4 [Source:VGNC Symbol;Acc:VGNC:52175]	ACP4	2.52236	2.13014	4.28489e-06	0.000135501
ENSBTAG00000001286	engulfment and cell motility 3 [Source:VGNC Symbol;Acc:VGNC:28440]	ELMO3	2.16138	5.32916	4.40297e-06	0.000138573
ENSBTAG00000015611	TBC1 domain family member 9B [Source:VGNC Symbol;Acc:VGNC:35647]	TBC1D9B	1.7344	6.66599	4.3961e-06	0.000138573
ENSBTAG00000043961	multiple PDZ domain crumbs cell polarity complex component [Source:VGNC Symbol;Acc:VGNC:31572]	MPDZ	2.37688	6.00884	4.42316e-06	0.000138879
ENSBTAG00000019916	calmin [Source:VGNC Symbol;Acc:VGNC:27452]	CLMN	1.98338	4.36627	4.67909e-06	0.000145782
ENSBTAG00000040190	coiled-coil domain containing 88B [Source:VGNC Symbol;Acc:VGNC:26928]	CCDC88B	3.71251	4.84742	4.68703e-06	0.000145782
ENSBTAG00000018638	coiled-coil and C2 domain containing 2A [Source:VGNC Symbol;Acc:VGNC:26826]	CC2D2A	2.52282	3.78978	4.77286e-06	0.000147726
ENSBTAG00000021497	cadherin related 23 [Source:NCBI gene (formerly Entrezgene);Acc:784716]	CDH23	2.55943	4.04983	4.78299e-06	0.000147726
ENSBTAG00000014178	Ral GTPase activating protein catalytic subunit alpha 2 [Source:VGNC Symbol;Acc:VGNC:33702]	RALGAPA2	4.61089	1.40586	4.80954e-06	0.000148201
ENSBTAG00000004905	keratin 19 [Source:VGNC Symbol;Acc:VGNC:30720]	KRT19	2.00504	11.7155	4.8787e-06	0.000149983
ENSBTAG00000047416	hephaestin [Source:VGNC Symbol;Acc:VGNC:29812]	HEPH	2.19767	3.34606	4.98992e-06	0.000152694
ENSBTAG00000044087	#NA	#NA	2.59794	1.7976	5.20872e-06	0.000157211
ENSBTAG00000009665	utrophin [Source:VGNC Symbol;Acc:VGNC:36749]	UTRN	3.09444	7.37067	5.2853e-06	0.00015916
ENSBTAG00000000736	LDL receptor related protein 8 [Source:VGNC Symbol;Acc:VGNC:30994]	LRP8	2.3465	5.84703	5.35684e-06	0.000160584
ENSBTAG00000046552	gamma-glutamylamine cyclotransferase [Source:VGNC Symbol;Acc:VGNC:29338]	GGACT	2.2936	3.7232	5.4452e-06	0.000162498
ENSBTAG00000002792	fucosyltransferase 11 [Source:VGNC Symbol;Acc:VGNC:29149]	FUT11	1.95076	4.98246	5.49846e-06	0.000162986
ENSBTAG00000005453	FYVE, RhoGEF and PH domain containing 4 [Source:VGNC Symbol;Acc:VGNC:28967]	FGD4	2.8241	3.14868	5.48648e-06	0.000162986
ENSBTAG00000010630	abhydrolase domain containing 18 [Source:VGNC Symbol;Acc:VGNC:25499]	ABHD18	2.23221	5.57557	5.47588e-06	0.000162986
ENSBTAG00000011970	folliculin interacting protein 2 [Source:VGNC Symbol;Acc:VGNC:29069]	FNIP2	2.17529	4.82745	5.62994e-06	0.000165037
ENSBTAG00000013596	nuclear receptor subfamily 1 group H member 4 [Source:VGNC Symbol;Acc:VGNC:32232]	NR1H4	5.37311	2.00933	5.6233e-06	0.000165037
ENSBTAG00000006160	sulfite oxidase [Source:VGNC Symbol;Acc:VGNC:35477]	SUOX	1.98967	5.31257	5.7238e-06	0.000166827
ENSBTAG00000017263	MAX interactor 1, dimerization protein [Source:VGNC Symbol;Acc:VGNC:31773]	MXI1	2.46136	4.07071	5.75565e-06	0.000166827
ENSBTAG00000049490	#NA	#NA	3.3719	3.69686	5.75713e-06	0.000166827
ENSBTAG00000019071	COMM domain containing 10 [Source:VGNC Symbol;Acc:VGNC:27582]	COMMD10	2.36615	4.57079	5.84919e-06	0.000168482
ENSBTAG00000001992	cytochrome P450, family 51, subfamily A, polypeptide 1 [Source:NCBI gene (formerly Entrezgene);Acc:505060]	CYP51A1	2.56189	8.82181	5.98427e-06	0.000171999
ENSBTAG00000019915	gelsolin [Source:VGNC Symbol;Acc:VGNC:29680]	GSN	2.42286	8.25892	6.01909e-06	0.000172626
ENSBTAG00000018936	lanosterol synthase [Source:VGNC Symbol;Acc:VGNC:31065]	LSS	2.41199	7.21321	6.04146e-06	0.000172637
ENSBTAG00000010581	membrane associated guanylate kinase, WW and PDZ domain containing 1 [Source:VGNC Symbol;Acc:VGNC:31147]	MAGI1	2.82906	6.26453	6.10925e-06	0.000174081
ENSBTAG00000002631	sodium channel epithelial 1 subunit alpha [Source:VGNC Symbol;Acc:VGNC:49961]	SCNN1A	3.10692	2.90968	6.16811e-06	0.000175381
ENSBTAG00000012708	serpin family I member 1 [Source:VGNC Symbol;Acc:VGNC:34481]	SERPINI1	2.37151	2.71844	6.20187e-06	0.000175633
ENSBTAG00000017533	leucine rich repeat containing 1 [Source:VGNC Symbol;Acc:VGNC:30998]	LRRC1	1.82125	6.59284	6.20348e-06	0.000175633
ENSBTAG00000052382	H2B clustered histone 4 [Source:VGNC Symbol;Acc:VGNC:83556]	H2BC4	3.84137	2.98003	6.33996e-06	0.000178733
ENSBTAG00000005976	hydroxysteroid 17-beta dehydrogenase 7 [Source:VGNC Symbol;Acc:VGNC:29976]	HSD17B7	2.18915	5.44852	6.36267e-06	0.000178992
ENSBTAG00000003221	activating transcription factor 7 interacting protein [Source:VGNC Symbol;Acc:VGNC:26246]	ATF7IP	2.55112	7.12976	6.41329e-06	0.000179275
ENSBTAG00000024482	RAB GTPase activating protein 1 like [Source:NCBI gene (formerly Entrezgene);Acc:540101]	0	3.32983	4.02552	6.45226e-06	0.000179606
ENSBTAG00000054085	selenoprotein P [Source:NCBI gene (formerly Entrezgene);Acc:282066]	SELENOP	2.65234	2.42339	6.48298e-06	0.000180083
ENSBTAG00000009231	NAD(P) dependent steroid dehydrogenase-like [Source:VGNC Symbol;Acc:VGNC:56932]	NSDHL	2.60134	7.02094	6.53239e-06	0.000181076
ENSBTAG00000014614	actin alpha 2, smooth muscle [Source:NCBI gene (formerly Entrezgene);Acc:515610]	ACTA2	2.72084	9.11266	6.55205e-06	0.000181242
ENSBTAG00000018744	alpha-1,6-mannosylglycoprotein 6-beta-N-acetylglucosaminyltransferase [Source:VGNC Symbol;Acc:VGNC:54620]	MGAT5	2.10699	4.58465	6.57373e-06	0.000181462
ENSBTAG00000018909	cAMP responsive element binding protein 5 [Source:NCBI gene (formerly Entrezgene);Acc:534129]	CREB5	2.41774	5.26265	6.69733e-06	0.000183346
ENSBTAG00000021143	DNA methyltransferase 3 alpha [Source:VGNC Symbol;Acc:VGNC:28146]	DNMT3A	1.62921	6.35127	6.69676e-06	0.000183346
ENSBTAG00000017819	phosphomevalonate kinase [Source:VGNC Symbol;Acc:VGNC:33078]	PMVK	2.12269	4.61013	6.79688e-06	0.000185688
ENSBTAG00000002367	host cell factor C1 regulator 1 [Source:VGNC Symbol;Acc:VGNC:29772]	HCFC1R1	1.78131	5.88937	7.20693e-06	0.000194484
ENSBTAG00000008654	hook microtubule tethering protein 2 [Source:VGNC Symbol;Acc:VGNC:29906]	HOOK2	2.27003	4.72681	7.16823e-06	0.000194484
ENSBTAG00000012451	major histocompatibility complex, class II, DM beta [Source:NCBI gene (formerly Entrezgene);Acc:282491]	BOLA-DMB	4.14188	2.13781	7.19193e-06	0.000194484
ENSBTAG00000052359	#NA	#NA	2.89837	2.87293	7.19851e-06	0.000194484
ENSBTAG00000011619	Ras interacting protein 1 [Source:VGNC Symbol;Acc:VGNC:33751]	RASIP1	2.02425	4.53903	7.34737e-06	0.000197871
ENSBTAG00000010120	HECT and RLD domain containing E3 ubiquitin protein ligase 3 [Source:VGNC Symbol;Acc:VGNC:50190]	HERC3	2.55529	4.70558	7.37983e-06	0.000198091
ENSBTAG00000015829	ectonucleotide pyrophosphatase/phosphodiesterase family member 5 [Source:VGNC Symbol;Acc:VGNC:58979]	ENPP5	2.78894	3.00361	7.47671e-06	0.000199731
ENSBTAG00000018563	secreted frizzled related protein 2 [Source:VGNC Symbol;Acc:VGNC:34521]	SFRP2	2.38942	10.78	7.50749e-06	0.000200149
ENSBTAG00000023843	Ral GEF with PH domain and SH3 binding motif 1 [Source:VGNC Symbol;Acc:VGNC:33704]	RALGPS1	3.47185	3.21818	7.52353e-06	0.000200174
ENSBTAG00000001919	zinc finger protein 652 [Source:VGNC Symbol;Acc:VGNC:37322]	ZNF652	2.57624	3.74436	7.57471e-06	0.00020073
ENSBTAG00000003675	adhesion G protein-coupled receptor L1 [Source:VGNC Symbol;Acc:VGNC:25671]	ADGRL1	2.66048	4.39005	7.5732e-06	0.00020073
ENSBTAG00000031252	CD82 molecule [Source:VGNC Symbol;Acc:VGNC:27049]	CD82	1.84516	7.1084	7.73927e-06	0.000204274
ENSBTAG00000053073	#NA	#NA	4.7722	1.31528	7.73828e-06	0.000204274
ENSBTAG00000010954	ADP-ribosyltransferase 3 (inactive) [Source:VGNC Symbol;Acc:VGNC:26180]	ART3	3.32737	3.29467	7.85144e-06	0.000206452
ENSBTAG00000000987	otogelin [Source:VGNC Symbol;Acc:VGNC:32485]	OTOG	4.02144	3.98788	8.10695e-06	0.000212707
ENSBTAG00000014334	zinc finger FYVE-type containing 26 [Source:VGNC Symbol;Acc:VGNC:37176]	ZFYVE26	2.52594	7.40508	8.18504e-06	0.000214332
ENSBTAG00000011518	retinoic acid receptor beta [Source:VGNC Symbol;Acc:VGNC:58402]	RARB	2.87392	3.774	8.20683e-06	0.000214478
ENSBTAG00000001808	lactamase beta 2 [Source:VGNC Symbol;Acc:VGNC:30765]	LACTB2	2.53419	3.89256	8.3536e-06	0.000217884
ENSBTAG00000016092	spermatogenesis associated serine rich 2 like [Source:VGNC Symbol;Acc:VGNC:35194]	SPATS2L	2.33034	7.74734	8.50259e-06	0.000220901
ENSBTAG00000025136	#NA	#NA	4.93268	1.75165	8.5737e-06	0.000222119
ENSBTAG00000054881	renalase, FAD dependent amine oxidase [Source:NCBI gene (formerly Entrezgene);Acc:534778]	RNLS	2.59964	1.78317	8.58302e-06	0.000222119
ENSBTAG00000010564	ELOVL fatty acid elongase 6 [Source:VGNC Symbol;Acc:VGNC:28452]	ELOVL6	3.01582	5.82072	8.66407e-06	0.000223779
ENSBTAG00000008285	oxidation resistance 1 [Source:VGNC Symbol;Acc:VGNC:55069]	OXR1	2.09767	4.97864	8.74352e-06	0.000225056
ENSBTAG00000018453	ankyrin repeat domain 37 [Source:VGNC Symbol;Acc:VGNC:25928]	ANKRD37	2.72587	1.91471	8.74747e-06	0.000225056
ENSBTAG00000016515	ephrin A5 [Source:VGNC Symbol;Acc:VGNC:28358]	EFNA5	2.32736	4.49613	8.86114e-06	0.000227539
ENSBTAG00000045588	bone marrow stromal antigen 2 [Source:NCBI gene (formerly Entrezgene);Acc:100298356]	0	2.63905	1.02073	8.8915e-06	0.000227877
ENSBTAG00000012501	FTO alpha-ketoglutarate dependent dioxygenase [Source:VGNC Symbol;Acc:VGNC:29138]	FTO	1.76851	6.37875	9.04232e-06	0.000230849
ENSBTAG00000043987	lysine demethylase 4C [Source:VGNC Symbol;Acc:VGNC:30529]	KDM4C	2.18157	4.03103	9.34072e-06	0.000238009
ENSBTAG00000002103	phospholipase C gamma 2 [Source:VGNC Symbol;Acc:VGNC:32989]	PLCG2	2.28015	2.67454	9.51416e-06	0.000241499
ENSBTAG00000003051	FER tyrosine kinase [Source:VGNC Symbol;Acc:VGNC:28948]	FER	2.92567	4.76114	9.59666e-06	0.000242895
ENSBTAG00000019409	N-acetylglucosamine-1-phosphate transferase subunits alpha and beta [Source:VGNC Symbol;Acc:VGNC:29479]	GNPTAB	2.16197	8.10389	9.60579e-06	0.000242895
ENSBTAG00000048312	#NA	#NA	4.1491	2.05062	9.63486e-06	0.000243166
ENSBTAG00000013861	solute carrier family 8 member A1 [Source:VGNC Symbol;Acc:VGNC:34935]	SLC8A1	2.8551	3.56618	9.73144e-06	0.000245136
ENSBTAG00000052247	tubulin polymerization promoting protein [Source:NCBI gene (formerly Entrezgene);Acc:280968]	TPPP	2.65207	4.61425	9.76428e-06	0.000245497
ENSBTAG00000008248	dystrophin [Source:NCBI gene (formerly Entrezgene);Acc:537655]	0	2.70249	4.31566	9.80487e-06	0.000246041
ENSBTAG00000046512	xin actin binding repeat containing 1 [Source:VGNC Symbol;Acc:VGNC:36985]	XIRP1	2.7782	3.48673	9.86528e-06	0.000246168
ENSBTAG00000009924	major histocompatibility complex, class I-related [Source:VGNC Symbol;Acc:VGNC:31595]	MR1	2.3607	3.54197	9.97756e-06	0.00024757
ENSBTAG00000003667	talin 2 [Source:VGNC Symbol;Acc:VGNC:35898]	TLN2	1.98079	5.84136	1.02876e-05	0.000253838
ENSBTAG00000047254	ATP binding cassette subfamily A member 2 [Source:VGNC Symbol;Acc:VGNC:25457]	ABCA2	2.3673	7.51128	1.02742e-05	0.000253838
ENSBTAG00000019107	growth arrest specific 7 [Source:VGNC Symbol;Acc:VGNC:29262]	GAS7	2.19103	3.69737	1.03112e-05	0.000253948
ENSBTAG00000004398	inner mitochondrial membrane peptidase subunit 2 [Source:VGNC Symbol;Acc:VGNC:57350]	IMMP2L	2.94021	2.81458	1.04698e-05	0.000256423
ENSBTAG00000054576	#NA	#NA	2.43409	3.48604	1.04519e-05	0.000256423
ENSBTAG00000032821	sciellin [Source:VGNC Symbol;Acc:VGNC:34329]	SCEL	4.99194	6.06832	1.06045e-05	0.000259244
ENSBTAG00000009209	BEN domain containing 5 [Source:VGNC Symbol;Acc:VGNC:26468]	BEND5	4.03803	0.941539	1.08813e-05	0.000264791
ENSBTAG00000026266	myosin, light chain 12B, regulatory [Source:NCBI gene (formerly Entrezgene);Acc:614055]	MYL12B	2.00068	5.98706	1.08914e-05	0.000264791
ENSBTAG00000021708	centrosomal protein 128 [Source:VGNC Symbol;Acc:VGNC:53080]	CEP128	2.49924	4.24392	1.12748e-05	0.000272116
ENSBTAG00000012180	Bcl2 modifying factor [Source:VGNC Symbol;Acc:VGNC:26513]	BMF	1.8416	4.64586	1.13861e-05	0.000274302
ENSBTAG00000020698	methylenetetrahydrofolate reductase [Source:VGNC Symbol;Acc:VGNC:31731]	MTHFR	2.03483	5.12304	1.14486e-05	0.000274809
ENSBTAG00000048480	#NA	#NA	5.09862	0.753653	1.14403e-05	0.000274809
ENSBTAG00000005681	malic enzyme 1 [Source:VGNC Symbol;Acc:VGNC:31339]	ME1	1.99715	6.27288	1.2013e-05	0.000287315
ENSBTAG00000003455	ankyrin repeat domain 6 [Source:VGNC Symbol;Acc:VGNC:53781]	ANKRD6	1.7904	4.58394	1.21619e-05	0.000290352
ENSBTAG00000004287	EvC ciliary complex subunit 1 [Source:VGNC Symbol;Acc:VGNC:28634]	EVC	1.92569	4.82633	1.2441e-05	0.00029648
ENSBTAG00000036028	brain expressed X-linked 2 [Source:NCBI gene (formerly Entrezgene);Acc:768028]	BEX2	4.34258	0.466159	1.25027e-05	0.000296883
ENSBTAG00000037650	retrotransposon Gag like 9 [Source:VGNC Symbol;Acc:VGNC:34202]	RTL9	3.3454	1.75304	1.24994e-05	0.000296883
ENSBTAG00000031890	dedicator of cytokinesis 1 [Source:VGNC Symbol;Acc:VGNC:28154]	DOCK1	1.79116	6.64674	1.282e-05	0.000303331
ENSBTAG00000012335	ubiquitin like modifier activating enzyme 7 [Source:VGNC Symbol;Acc:VGNC:36566]	UBA7	2.29846	4.5249	1.28617e-05	0.000303774
ENSBTAG00000014119	protein kinase C zeta [Source:VGNC Symbol;Acc:VGNC:33336]	PRKCZ	1.7804	5.21095	1.29588e-05	0.000305523
ENSBTAG00000005729	F-box and leucine rich repeat protein 4 [Source:VGNC Symbol;Acc:VGNC:59171]	FBXL4	2.50226	2.19108	1.3098e-05	0.000307059
ENSBTAG00000054797	#NA	#NA	3.18842	3.47051	1.31166e-05	0.000307059
ENSBTAG00000015235	hemicentin 1 [Source:VGNC Symbol;Acc:VGNC:29872]	HMCN1	2.09649	6.25987	1.33117e-05	0.000311076
ENSBTAG00000007865	glucosamine-6-phosphate deaminase 1 [Source:VGNC Symbol;Acc:VGNC:29476]	GNPDA1	1.81102	6.07662	1.33869e-05	0.000312283
ENSBTAG00000010906	ribosomal protein S6 kinase A5 [Source:VGNC Symbol;Acc:VGNC:34144]	RPS6KA5	2.33781	3.48309	1.35315e-05	0.000315101
ENSBTAG00000018178	nuclear prelamin A recognition factor [Source:VGNC Symbol;Acc:VGNC:55858]	NARF	1.60239	6.53054	1.35566e-05	0.000315132
ENSBTAG00000009181	inositol polyphosphate-5-phosphatase A [Source:VGNC Symbol;Acc:VGNC:30210]	INPP5A	1.60489	5.18796	1.38179e-05	0.000319243
ENSBTAG00000051913	uronyl 2-sulfotransferase [Source:NCBI gene (formerly Entrezgene);Acc:535975]	UST	2.15994	5.39094	1.38298e-05	0.000319243
ENSBTAG00000044062	RNA binding motif single stranded interacting protein 3 [Source:VGNC Symbol;Acc:VGNC:33811]	RBMS3	3.8775	3.85099	1.43303e-05	0.000329647
ENSBTAG00000008121	R-spondin 3 [Source:NCBI gene (formerly Entrezgene);Acc:534650]	RSPO3	2.65585	4.51262	1.44202e-05	0.000330568
ENSBTAG00000018438	Ras related GTP binding D [Source:VGNC Symbol;Acc:VGNC:34161]	RRAGD	1.83014	3.73404	1.4521e-05	0.000332166
ENSBTAG00000051909	#NA	#NA	2.38352	1.98899	1.45401e-05	0.000332166
ENSBTAG00000024911	#NA	#NA	7.646	-0.110972	1.46442e-05	0.000333969
ENSBTAG00000010163	sodium channel epithelial 1 subunit gamma [Source:VGNC Symbol;Acc:VGNC:34358]	SCNN1G	3.02504	4.71716	1.48657e-05	0.000338437
ENSBTAG00000020136	calcium/calmodulin dependent serine protein kinase [Source:VGNC Symbol;Acc:VGNC:26776]	CASK	2.0834	5.8252	1.52801e-05	0.000346679
ENSBTAG00000031871	NFKB activating protein like [Source:VGNC Symbol;Acc:VGNC:54230]	NKAPL	2.73589	4.4159	1.52683e-05	0.000346679
ENSBTAG00000030282	zinc finger BED-type containing 8 [Source:VGNC Symbol;Acc:VGNC:37055]	ZBED8	1.76396	6.02852	1.53687e-05	0.0003475
ENSBTAG00000021133	teneurin transmembrane protein 3 [Source:VGNC Symbol;Acc:VGNC:35743]	TENM3	2.77752	3.35164	1.55548e-05	0.000349916
ENSBTAG00000008125	potassium voltage-gated channel subfamily A regulatory beta subunit 2 [Source:VGNC Symbol;Acc:VGNC:30428]	KCNAB2	1.8502	4.11945	1.59122e-05	0.000357349
ENSBTAG00000054442	#NA	#NA	2.2223	1.89019	1.65511e-05	0.00037107
ENSBTAG00000002580	myosin heavy chain 14 [Source:VGNC Symbol;Acc:VGNC:31796]	MYH14	2.50036	2.50179	1.65946e-05	0.000371417
ENSBTAG00000003075	dishevelled segment polarity protein 2 [Source:VGNC Symbol;Acc:VGNC:28265]	DVL2	1.58696	5.53766	1.6798e-05	0.000375334
ENSBTAG00000007962	ATPase phospholipid transporting 9A (putative) [Source:NCBI gene (formerly Entrezgene);Acc:516579]	ATP9A	1.63643	5.78235	1.68415e-05	0.000375674
ENSBTAG00000039302	angiopoietin like 6 [Source:VGNC Symbol;Acc:VGNC:25894]	ANGPTL6	2.50466	1.84944	1.68919e-05	0.000376164
ENSBTAG00000008734	peptidase M20 domain containing 1 [Source:VGNC Symbol;Acc:VGNC:33066]	PM20D1	1.67096	4.85271	1.71157e-05	0.000380509
ENSBTAG00000011971	neuropilin 2 [Source:VGNC Symbol;Acc:VGNC:32267]	NRP2	1.49466	7.32179	1.75932e-05	0.000389815
ENSBTAG00000008827	SPARC (osteonectin), cwcv and kazal like domains proteoglycan 2 [Source:VGNC Symbol;Acc:VGNC:35226]	SPOCK2	2.38933	3.07881	1.78636e-05	0.000395146
ENSBTAG00000020455	inositol 1,4,5-trisphosphate receptor type 1 [Source:VGNC Symbol;Acc:VGNC:30346]	ITPR1	2.0781	4.9312	1.79546e-05	0.000396498
ENSBTAG00000052330	#NA	#NA	2.67213	1.59368	1.80962e-05	0.000398958
ENSBTAG00000051719	#NA	#NA	2.45481	1.7286	1.83793e-05	0.000404528
ENSBTAG00000001164	acyl-CoA dehydrogenase family, member 10 [Source:NCBI gene (formerly Entrezgene);Acc:511425]	ACAD10	2.03263	4.69907	1.8462e-05	0.000405675
ENSBTAG00000006282	POU class 2 homeobox associating factor 1 [Source:VGNC Symbol;Acc:VGNC:33173]	POU2AF1	3.58022	2.23098	1.87068e-05	0.000409694
ENSBTAG00000014124	MLLT3 super elongation complex subunit [Source:VGNC Symbol;Acc:VGNC:31503]	MLLT3	2.68603	3.43832	1.90559e-05	0.000415965
ENSBTAG00000006167	BTB (POZ) domain containing 8 [Source:NCBI gene (formerly Entrezgene);Acc:520456]	BTBD8	2.92696	3.2773	1.92034e-05	0.000417274
ENSBTAG00000020269	#NA	#NA	4.35894	0.0301346	1.91761e-05	0.000417274
ENSBTAG00000034998	SUMO interacting motifs containing 1 [Source:VGNC Symbol;Acc:VGNC:54482]	SIMC1	2.13174	6.43242	1.92104e-05	0.000417274
ENSBTAG00000006214	lysyl oxidase like 2 [Source:VGNC Symbol;Acc:VGNC:30953]	LOXL2	1.58938	9.67978	1.96044e-05	0.000425137
ENSBTAG00000000087	hydroxysteroid 17-beta dehydrogenase 12 [Source:VGNC Symbol;Acc:VGNC:54883]	HSD17B12	1.95166	6.86798	2.06527e-05	0.000445681
ENSBTAG00000010856	solute carrier family 8 member A2 [Source:VGNC Symbol;Acc:VGNC:34936]	SLC8A2	4.16662	0.871934	2.07364e-05	0.00044676
ENSBTAG00000040496	potassium voltage-gated channel subfamily B member 2 [Source:VGNC Symbol;Acc:VGNC:30431]	KCNB2	4.25492	2.68119	2.09214e-05	0.000449284
ENSBTAG00000003220	atypical chemokine receptor 1 [Source:VGNC Symbol;Acc:VGNC:58436]	ACKR1	2.88519	1.34143	2.09974e-05	0.000450187
ENSBTAG00000008997	endoglin [Source:VGNC Symbol;Acc:VGNC:102821]	ENG	2.75411	3.65377	2.14354e-05	0.000457835
ENSBTAG00000037413	transmembrane protein 164 [Source:VGNC Symbol;Acc:VGNC:35989]	TMEM164	1.82092	4.47303	2.14578e-05	0.000457835
ENSBTAG00000010742	polycystin 2 like 1, transient receptor potential cation channel [Source:VGNC Symbol;Acc:VGNC:32936]	PKD2L1	2.50803	2.459	2.16699e-05	0.000461618
ENSBTAG00000003128	spermatogenesis associated 6 [Source:VGNC Symbol;Acc:VGNC:35189]	SPATA6	2.19632	3.69207	2.20416e-05	0.000468782
ENSBTAG00000000128	fibroblast growth factor 18 [Source:VGNC Symbol;Acc:VGNC:28974]	FGF18	2.62964	2.03478	2.21788e-05	0.000470944
ENSBTAG00000048659	#NA	#NA	4.15963	0.530184	2.24695e-05	0.000475592
ENSBTAG00000005738	ATPase phospholipid transporting 8B1 [Source:VGNC Symbol;Acc:VGNC:26330]	ATP8B1	2.02584	6.07588	2.27158e-05	0.000480039
ENSBTAG00000008022	prostaglandin F2 receptor inhibitor [Source:VGNC Symbol;Acc:VGNC:33508]	PTGFRN	1.81148	6.74443	2.2832e-05	0.000481727
ENSBTAG00000002233	copine 2 [Source:VGNC Symbol;Acc:VGNC:27659]	CPNE2	1.60015	7.60594	2.31218e-05	0.000486291
ENSBTAG00000007288	cyclin dependent kinase 19 [Source:VGNC Symbol;Acc:VGNC:27122]	CDK19	2.12744	5.22377	2.30983e-05	0.000486291
ENSBTAG00000004645	ADAMTS like 3 [Source:VGNC Symbol;Acc:VGNC:58360]	ADAMTSL3	2.53851	1.41477	2.32429e-05	0.000486523
ENSBTAG00000021574	transcription factor 7 like 2 [Source:VGNC Symbol;Acc:VGNC:55976]	TCF7L2	1.94068	6.87457	2.32245e-05	0.000486523
ENSBTAG00000023562	potassium two pore domain channel subfamily K member 6 [Source:VGNC Symbol;Acc:VGNC:30476]	KCNK6	1.94914	4.23316	2.3207e-05	0.000486523
ENSBTAG00000020315	DENN domain containing 5B [Source:VGNC Symbol;Acc:VGNC:28002]	DENND5B	2.01509	5.26364	2.35858e-05	0.000492586
ENSBTAG00000031950	RAB3A interacting protein [Source:VGNC Symbol;Acc:VGNC:56227]	RAB3IP	4.00042	0.573704	2.36069e-05	0.000492586
ENSBTAG00000016498	phosphatase and actin regulator 2 [Source:VGNC Symbol;Acc:VGNC:32805]	PHACTR2	2.66363	3.11632	2.3684e-05	0.000493417
ENSBTAG00000018225	signal induced proliferation associated 1 like 3 [Source:VGNC Symbol;Acc:VGNC:53042]	SIPA1L3	1.65495	6.12118	2.37891e-05	0.000494829
ENSBTAG00000003948	farnesyl diphosphate synthase [Source:NCBI gene (formerly Entrezgene);Acc:281156]	FDPS	1.97185	7.24042	2.41849e-05	0.000502273
ENSBTAG00000013495	WD repeat and FYVE domain containing 3 [Source:VGNC Symbol;Acc:VGNC:36877]	WDFY3	1.89175	6.64432	2.43084e-05	0.000504047
ENSBTAG00000000803	zinc finger protein 667 [Source:VGNC Symbol;Acc:VGNC:37325]	ZNF667	1.95564	3.5365	2.48739e-05	0.000514164
ENSBTAG00000050658	#NA	#NA	5.17494	0.0963605	2.48655e-05	0.000514164
ENSBTAG00000001497	muscle RAS oncogene homolog [Source:VGNC Symbol;Acc:VGNC:31597]	MRAS	1.56372	7.45154	2.49527e-05	0.000514721
ENSBTAG00000002037	ataxin 7 like 1 [Source:VGNC Symbol;Acc:VGNC:26343]	ATXN7L1	2.72015	2.74989	2.49993e-05	0.000514721
ENSBTAG00000014636	zinc finger homeobox 3 [Source:VGNC Symbol;Acc:VGNC:37157]	ZFHX3	2.23526	4.97966	2.50174e-05	0.000514721
ENSBTAG00000014750	erythrocyte membrane protein band 4.1 like 4A [Source:VGNC Symbol;Acc:VGNC:28523]	EPB41L4A	2.30936	5.66132	2.5325e-05	0.000520242
ENSBTAG00000014945	IQ motif and Sec7 domain ArfGEF 2 [Source:VGNC Symbol;Acc:VGNC:30262]	IQSEC2	1.79088	4.17892	2.61579e-05	0.000536521
ENSBTAG00000049137	#NA	#NA	2.80156	2.37036	2.62222e-05	0.000537007
ENSBTAG00000010399	thioredoxin domain containing 16 [Source:VGNC Symbol;Acc:VGNC:36537]	TXNDC16	2.32385	2.5042	2.63847e-05	0.000539502
ENSBTAG00000003490	engulfment and cell motility 1 [Source:VGNC Symbol;Acc:VGNC:28438]	ELMO1	3.32798	3.74765	2.69462e-05	0.000550133
ENSBTAG00000014619	WASP family member 3 [Source:VGNC Symbol;Acc:VGNC:36867]	WASF3	3.91523	0.63866	2.70812e-05	0.00055204
ENSBTAG00000020931	chimerin 2 [Source:VGNC Symbol;Acc:VGNC:50060]	CHN2	1.75763	5.7682	2.75064e-05	0.000558988
ENSBTAG00000010462	roundabout guidance receptor 2 [Source:VGNC Symbol;Acc:VGNC:34079]	ROBO2	3.55909	3.99013	2.77875e-05	0.000563836
ENSBTAG00000016845	polypeptide N-acetylgalactosaminyltransferase 7 [Source:VGNC Symbol;Acc:VGNC:29235]	GALNT7	2.42782	3.07311	2.78429e-05	0.000564096
ENSBTAG00000004805	integrin alpha FG-GAP repeat containing 1 [Source:VGNC Symbol;Acc:VGNC:30308]	ITFG1	1.94508	6.16388	2.79445e-05	0.00056529
ENSBTAG00000024081	extracellular matrix protein 2 [Source:VGNC Symbol;Acc:VGNC:28312]	ECM2	2.88183	4.66634	2.83109e-05	0.000570959
ENSBTAG00000008083	SEL1L adaptor subunit of ERAD E3 ubiquitin ligase [Source:VGNC Symbol;Acc:VGNC:49962]	SEL1L	1.67033	8.13041	2.84264e-05	0.000572417
ENSBTAG00000000146	FERM, ARH/RhoGEF and pleckstrin domain protein 1 [Source:VGNC Symbol;Acc:VGNC:28865]	FARP1	2.03538	4.49545	2.85149e-05	0.000573328
ENSBTAG00000004262	#NA	#NA	4.70805	-0.270263	2.88006e-05	0.000578195
ENSBTAG00000004757	latent transforming growth factor beta binding protein 4 [Source:VGNC Symbol;Acc:VGNC:31074]	LTBP4	2.077	8.19251	2.91268e-05	0.000583859
ENSBTAG00000016836	pyruvate dehydrogenase kinase 1 [Source:VGNC Symbol;Acc:VGNC:32703]	PDK1	2.49039	5.91486	3.00264e-05	0.00059827
ENSBTAG00000018598	heat shock protein family B (small) member 6 [Source:NCBI gene (formerly Entrezgene);Acc:534551]	HSPB6	2.61607	6.08582	3.02825e-05	0.000602467
ENSBTAG00000000015	FAD dependent oxidoreductase domain containing 2 [Source:VGNC Symbol;Acc:VGNC:29107]	FOXRED2	1.86783	4.68447	3.0515e-05	0.000606182
ENSBTAG00000005745	heparanase [Source:VGNC Symbol;Acc:VGNC:29948]	HPSE	4.36182	0.673751	3.06835e-05	0.000607708
ENSBTAG00000047532	triple QxxK/R motif containing [Source:VGNC Symbol;Acc:VGNC:36361]	TRIQK	2.58446	2.90965	3.06693e-05	0.000607708
ENSBTAG00000005183	mevalonate kinase [Source:VGNC Symbol;Acc:VGNC:31768]	MVK	2.01228	5.80998	3.09144e-05	0.000610456
ENSBTAG00000031669	catenin alpha 2 [Source:NCBI gene (formerly Entrezgene);Acc:527492]	CTNNA2	4.38349	1.86727	3.10759e-05	0.000611757
ENSBTAG00000032079	synaptotagmin 9 [Source:VGNC Symbol;Acc:VGNC:35545]	SYT9	2.26707	2.38385	3.10475e-05	0.000611757
ENSBTAG00000020569	calcium voltage-gated channel auxiliary subunit alpha2delta 1 [Source:VGNC Symbol;Acc:VGNC:26679]	CACNA2D1	2.91946	3.11923	3.12201e-05	0.000612839
ENSBTAG00000001507	chloride voltage-gated channel 5 [Source:VGNC Symbol;Acc:VGNC:27399]	CLCN5	2.24895	3.72652	3.15534e-05	0.000617797
ENSBTAG00000054065	#NA	#NA	8.23636	0.09796	3.1693e-05	0.00061937
ENSBTAG00000005034	calpain 5 [Source:VGNC Symbol;Acc:VGNC:26748]	CAPN5	1.75079	5.85573	3.18341e-05	0.000621211
ENSBTAG00000001941	semaphorin 4D [Source:VGNC Symbol;Acc:VGNC:34436]	SEMA4D	2.11403	3.63895	3.21247e-05	0.000625959
ENSBTAG00000002303	golgi glycoprotein 1 [Source:VGNC Symbol;Acc:VGNC:29398]	GLG1	1.49899	8.90325	3.26012e-05	0.000633382
ENSBTAG00000043948	hyperpolarization activated cyclic nucleotide gated potassium channel 1 [Source:VGNC Symbol;Acc:VGNC:29776]	HCN1	3.8828	0.331739	3.34074e-05	0.000648094
ENSBTAG00000012348	leucine rich repeat containing 71 [Source:VGNC Symbol;Acc:VGNC:31025]	LRRC71	1.95565	3.51754	3.34946e-05	0.000648835
ENSBTAG00000002015	ribosomal protein S6 kinase A6 [Source:VGNC Symbol;Acc:VGNC:34145]	RPS6KA6	2.22013	5.12725	3.3752e-05	0.000652867
ENSBTAG00000018347	interleukin 33 [Source:VGNC Symbol;Acc:VGNC:30155]	IL33	4.39304	2.84738	3.39093e-05	0.000654954
ENSBTAG00000019427	KIAA0232 [Source:VGNC Symbol;Acc:VGNC:30547]	KIAA0232	1.76535	6.49682	3.42e-05	0.000658649
ENSBTAG00000017023	inositol polyphosphate-5-phosphatase J [Source:VGNC Symbol;Acc:VGNC:53909]	INPP5J	2.32149	3.24729	3.56369e-05	0.000685326
ENSBTAG00000013912	thioredoxin reductase 1 [Source:VGNC Symbol;Acc:VGNC:36545]	TXNRD1	1.53177	8.26218	3.60542e-05	0.000691344
ENSBTAG00000018517	very low density lipoprotein receptor [Source:VGNC Symbol;Acc:VGNC:36803]	VLDLR	2.09434	4.13145	3.61947e-05	0.000693034
ENSBTAG00000044007	Kruppel like factor 12 [Source:VGNC Symbol;Acc:VGNC:30628]	KLF12	5.48911	2.3011	3.70486e-05	0.000706323
ENSBTAG00000011644	thrombospondin type 1 domain containing 4 [Source:NCBI gene (formerly Entrezgene);Acc:540939]	THSD4	3.38686	2.8027	3.7296e-05	0.000710017
ENSBTAG00000054812	#NA	#NA	4.48238	1.42527	3.83326e-05	0.000726619
ENSBTAG00000007814	WW domain containing transcription regulator 1 [Source:VGNC Symbol;Acc:VGNC:36980]	WWTR1	1.49644	5.58166	3.84259e-05	0.000727347
ENSBTAG00000031777	glycerophosphodiester phosphodiesterase domain containing 5 [Source:VGNC Symbol;Acc:VGNC:29313]	GDPD5	1.9255	5.90299	3.85511e-05	0.000727639
ENSBTAG00000009960	flotillin 1 [Source:VGNC Symbol;Acc:VGNC:29036]	FLOT1	1.65638	6.91762	3.87056e-05	0.000729515
ENSBTAG00000004266	DEAD-box helicase 25 [Source:VGNC Symbol;Acc:VGNC:27961]	DDX25	2.03975	2.72497	3.88227e-05	0.000729647
ENSBTAG00000007036	solute carrier family 17 member 7 [Source:VGNC Symbol;Acc:VGNC:34702]	SLC17A7	2.32	2.16209	3.92732e-05	0.000737068
ENSBTAG00000008966	tetraspanin 7 [Source:NCBI gene (formerly Entrezgene);Acc:615596]	TSPAN7	1.78565	5.33683	4.06024e-05	0.000759861
ENSBTAG00000015662	interphotoreceptor matrix proteoglycan 2 [Source:VGNC Symbol;Acc:VGNC:30190]	IMPG2	1.97426	2.89297	4.06689e-05	0.000760033
ENSBTAG00000013900	tripartite motif containing 21 [Source:VGNC Symbol;Acc:VGNC:36319]	TRIM21	1.86217	3.50341	4.07401e-05	0.00076029
ENSBTAG00000017350	piccolo presynaptic cytomatrix protein [Source:VGNC Symbol;Acc:VGNC:32633]	PCLO	4.56233	2.47785	4.13198e-05	0.000770025
ENSBTAG00000031737	transmembrane protein 102 [Source:VGNC Symbol;Acc:VGNC:35943]	TMEM102	3.78364	1.61197	4.15088e-05	0.000772461
ENSBTAG00000017719	A-kinase anchoring protein 6 [Source:VGNC Symbol;Acc:VGNC:25787]	AKAP6	3.27434	3.97405	4.16934e-05	0.000773722
ENSBTAG00000002313	inositol 1,4,5-trisphosphate receptor type 2 [Source:VGNC Symbol;Acc:VGNC:30347]	ITPR2	2.53624	3.64929	4.20132e-05	0.000778566
ENSBTAG00000010178	protein tyrosine phosphatase receptor type D [Source:VGNC Symbol;Acc:VGNC:33548]	PTPRD	7.37253	1.22601	4.21536e-05	0.000780078
ENSBTAG00000001293	cilia and flagella associated protein 91 [Source:VGNC Symbol;Acc:VGNC:31126]	CFAP91	2.76017	1.18166	4.24113e-05	0.000783752
ENSBTAG00000013921	#NA	#NA	3.40058	0.00245799	4.28509e-05	0.000790773
ENSBTAG00000054931	calcium voltage-gated channel auxiliary subunit gamma 4 [Source:NCBI gene (formerly Entrezgene);Acc:519331]	CACNG4	6.52813	0.38492	4.34075e-05	0.00079993
ENSBTAG00000001822	sorting nexin 10 [Source:VGNC Symbol;Acc:VGNC:35091]	SNX10	1.81174	6.56803	4.3587e-05	0.000801845
ENSBTAG00000017285	fibroblast growth factor 19 [Source:VGNC Symbol;Acc:VGNC:28975]	FGF19	2.62476	1.2113	4.36325e-05	0.000801845
ENSBTAG00000021187	inhibitor of DNA binding 2 [Source:VGNC Symbol;Acc:VGNC:59229]	ID2	1.74827	7.1892	4.41281e-05	0.000808709
ENSBTAG00000040253	adrenoceptor alpha 1B [Source:VGNC Symbol;Acc:VGNC:25694]	ADRA1B	3.46981	0.6495	4.47644e-05	0.000819238
ENSBTAG00000049049	#NA	#NA	3.5102	-0.482801	4.50592e-05	0.000823497
ENSBTAG00000016334	#NA	#NA	6.66753	-0.703619	4.55524e-05	0.000830719
ENSBTAG00000049105	#NA	#NA	1.94168	4.02514	4.55798e-05	0.000830719
ENSBTAG00000002417	RAB30, member RAS oncogene family [Source:VGNC Symbol;Acc:VGNC:33639]	RAB30	1.85012	3.54347	4.57271e-05	0.000832258
ENSBTAG00000000977	cell adhesion molecule 1 [Source:VGNC Symbol;Acc:VGNC:26694]	CADM1	2.04174	5.17043	4.618e-05	0.000839348
ENSBTAG00000002982	PITPNM family member 3 [Source:VGNC Symbol;Acc:VGNC:52807]	PITPNM3	3.66194	2.82885	4.73165e-05	0.000858827
ENSBTAG00000001950	retinol dehydrogenase 11 [Source:VGNC Symbol;Acc:VGNC:55139]	RDH11	1.60608	6.33944	4.81447e-05	0.000870283
ENSBTAG00000009607	LARGE xylosyl- and glucuronyltransferase 2 [Source:VGNC Symbol;Acc:VGNC:30789]	LARGE2	1.75513	4.32491	4.81419e-05	0.000870283
ENSBTAG00000015513	dedicator of cytokinesis 5 [Source:VGNC Symbol;Acc:VGNC:28159]	DOCK5	1.85259	6.64416	4.83913e-05	0.000873548
ENSBTAG00000019164	Rho related BTB domain containing 1 [Source:VGNC Symbol;Acc:VGNC:33945]	RHOBTB1	2.41543	3.40902	4.92049e-05	0.000887027
ENSBTAG00000001609	mitogen-activated protein kinase kinase 6 [Source:VGNC Symbol;Acc:VGNC:31187]	MAP2K6	5.05265	0.760386	5.02284e-05	0.000900782
ENSBTAG00000005124	jade family PHD finger 3 [Source:VGNC Symbol;Acc:VGNC:30360]	JADE3	1.63606	6.98497	5.02164e-05	0.000900782
ENSBTAG00000024560	stum, mechanosensory transduction mediator homolog [Source:VGNC Symbol;Acc:VGNC:35429]	STUM	4.84271	0.519	5.02398e-05	0.000900782
ENSBTAG00000011857	protein phosphatase, Mg2+/Mn2+ dependent 1H [Source:VGNC Symbol;Acc:VGNC:33214]	PPM1H	1.899	3.49461	5.11812e-05	0.00091642
ENSBTAG00000000951	Janus kinase and microtubule interacting protein 3 [Source:VGNC Symbol;Acc:VGNC:30369]	JAKMIP3	2.09948	3.75684	5.12537e-05	0.00091648
ENSBTAG00000004427	oxysterol binding protein like 8 [Source:VGNC Symbol;Acc:VGNC:32466]	OSBPL8	2.10883	5.59215	5.2886e-05	0.000943121
ENSBTAG00000017289	MCF.2 cell line derived transforming sequence like [Source:VGNC Symbol;Acc:VGNC:31302]	MCF2L	3.58983	0.494241	5.28824e-05	0.000943121
ENSBTAG00000018069	TNF superfamily member 15 [Source:VGNC Symbol;Acc:VGNC:36174]	TNFSF15	2.98544	1.5707	5.35282e-05	0.000953292
ENSBTAG00000019867	copper metabolism domain containing 1 [Source:VGNC Symbol;Acc:VGNC:27581]	COMMD1	1.96142	3.94068	5.46051e-05	0.000969534
ENSBTAG00000034633	endoplasmic reticulum oxidoreductase 1 beta [Source:VGNC Symbol;Acc:VGNC:28595]	ERO1B	1.84177	2.57354	5.46598e-05	0.000969534
ENSBTAG00000000074	nuclear factor I A [Source:VGNC Symbol;Acc:VGNC:32038]	NFIA	2.01006	5.52587	5.53285e-05	0.000980084
ENSBTAG00000003727	SH3 domain containing kinase binding protein 1 [Source:VGNC Symbol;Acc:VGNC:34577]	SH3KBP1	2.43856	5.54233	5.55632e-05	0.000982928
ENSBTAG00000051831	chromodomain helicase DNA binding protein 2 [Source:NCBI gene (formerly Entrezgene);Acc:535026]	CHD2	1.93374	6.66606	5.59609e-05	0.000987326
ENSBTAG00000030667	outer dynein arm docking complex subunit 1 [Source:VGNC Symbol;Acc:VGNC:26836]	ODAD1	2.14326	2.59133	5.60449e-05	0.000987493
ENSBTAG00000020527	isocitrate dehydrogenase (NADP(+)) 1 [Source:NCBI gene (formerly Entrezgene);Acc:281235]	IDH1	1.88272	6.19989	5.65509e-05	0.000995085
ENSBTAG00000005733	chromodomain helicase DNA binding protein 6 [Source:VGNC Symbol;Acc:VGNC:27281]	CHD6	1.75041	5.99755	5.70207e-05	0.00100069
ENSBTAG00000000746	lysine acetyltransferase 2B [Source:VGNC Symbol;Acc:VGNC:30399]	KAT2B	1.90712	6.13114	5.73268e-05	0.00100222
ENSBTAG00000005650	src kinase associated phosphoprotein 2 [Source:VGNC Symbol;Acc:VGNC:34646]	SKAP2	1.86654	6.54122	5.72483e-05	0.00100222
ENSBTAG00000013556	unc-13 homolog D [Source:VGNC Symbol;Acc:VGNC:36666]	UNC13D	2.60735	5.97782	5.73344e-05	0.00100222
ENSBTAG00000016140	PPFIA binding protein 2 [Source:VGNC Symbol;Acc:VGNC:58399]	PPFIBP2	2.00192	3.60953	5.82732e-05	0.00101729
ENSBTAG00000010353	ATPase copper transporting beta [Source:VGNC Symbol;Acc:VGNC:26328]	ATP7B	1.85382	4.68532	5.8665e-05	0.00102278
ENSBTAG00000055140	C-type lectin domain family 2, member B [Source:NCBI gene (formerly Entrezgene);Acc:100297496]	0	2.65023	4.34643	5.96837e-05	0.00103781
ENSBTAG00000015321	transcriptional regulating factor 1 [Source:VGNC Symbol;Acc:VGNC:36302]	TRERF1	2.05735	4.37401	6.06562e-05	0.00105334
ENSBTAG00000025748	#NA	#NA	4.77824	2.21292	6.08092e-05	0.00105461
ENSBTAG00000038617	SH3 domain containing 21 [Source:VGNC Symbol;Acc:VGNC:34571]	SH3D21	1.62707	5.68765	6.09827e-05	0.00105624
ENSBTAG00000019947	#NA	#NA	6.44524	-1.06764	6.11397e-05	0.00105757
ENSBTAG00000051882	#NA	#NA	6.19588	-0.987015	6.16179e-05	0.00106307
ENSBTAG00000011742	TRAF2 and NCK interacting kinase [Source:VGNC Symbol;Acc:VGNC:36179]	TNIK	1.83223	5.03727	6.19616e-05	0.00106761
ENSBTAG00000030369	intermediate filament family orphan 1 [Source:VGNC Symbol;Acc:VGNC:30042]	IFFO1	2.44183	3.69837	6.21571e-05	0.00106959
ENSBTAG00000002515	dynein axonemal assembly factor 3 [Source:NCBI gene (formerly Entrezgene);Acc:104968460]	TNNI3	1.7591	4.02682	6.26639e-05	0.00107691
ENSBTAG00000004907	misshapen like kinase 1 [Source:VGNC Symbol;Acc:VGNC:31479]	MINK1	1.45147	8.27473	6.27727e-05	0.00107738
ENSBTAG00000016229	Kruppel like factor 9 [Source:VGNC Symbol;Acc:VGNC:30632]	KLF9	1.96689	6.31949	6.33747e-05	0.0010849
ENSBTAG00000001405	glucuronic acid epimerase [Source:VGNC Symbol;Acc:VGNC:29394]	GLCE	1.57478	7.00678	6.37827e-05	0.00109048
ENSBTAG00000038117	autophagy related 10 [Source:VGNC Symbol;Acc:VGNC:26248]	ATG10	3.35824	1.38339	6.42862e-05	0.00109767
ENSBTAG00000003359	ELOVL fatty acid elongase 5 [Source:VGNC Symbol;Acc:VGNC:28451]	ELOVL5	1.61077	8.55475	6.47427e-05	0.00110404
ENSBTAG00000032092	cadherin 11 [Source:VGNC Symbol;Acc:VGNC:27092]	CDH11	1.82021	8.96041	6.59003e-05	0.00112234
ENSBTAG00000020766	ATP binding cassette subfamily A member 7 [Source:VGNC Symbol;Acc:VGNC:25461]	ABCA7	1.99748	3.3592	6.74222e-05	0.00114531
ENSBTAG00000000184	eukaryotic translation initiation factor 2 alpha kinase 3 [Source:VGNC Symbol;Acc:VGNC:28382]	EIF2AK3	1.55465	6.33216	6.76053e-05	0.00114695
ENSBTAG00000025263	#NA	#NA	4.55385	-0.437941	6.78891e-05	0.00114883
ENSBTAG00000000539	leucine rich repeat containing 28 [Source:VGNC Symbol;Acc:VGNC:31007]	LRRC28	1.91877	3.6752	6.82103e-05	0.00115279
ENSBTAG00000017769	RIB43A domain with coiled-coils 1 [Source:VGNC Symbol;Acc:VGNC:33957]	RIBC1	2.41902	2.1658	6.90579e-05	0.00116414
ENSBTAG00000027425	coiled-coil domain containing 190 [Source:VGNC Symbol;Acc:VGNC:26883]	CCDC190	2.94778	2.86907	6.95504e-05	0.00116972
ENSBTAG00000048856	chromosome 16 C1orf115 homolog [Source:VGNC Symbol;Acc:VGNC:52640]	C16H1orf115	2.39223	1.87315	6.98954e-05	0.0011723
ENSBTAG00000048354	#NA	#NA	4.4414	-0.653788	7.01576e-05	0.00117521
ENSBTAG00000008916	cytoplasmic FMR1 interacting protein 2 [Source:VGNC Symbol;Acc:VGNC:50267]	CYFIP2	1.97563	3.11641	7.08805e-05	0.00118432
ENSBTAG00000013524	c-Maf inducing protein [Source:VGNC Symbol;Acc:VGNC:52187]	CMIP	1.54403	6.68664	7.08801e-05	0.00118432
ENSBTAG00000009357	interleukin 34 [Source:VGNC Symbol;Acc:VGNC:30156]	IL34	2.82375	0.658308	7.18148e-05	0.00119842
ENSBTAG00000000244	#NA	#NA	4.169	0.038395	7.20849e-05	0.00120142
ENSBTAG00000000799	islet cell autoantigen 1 [Source:VGNC Symbol;Acc:VGNC:30023]	ICA1	2.93854	2.56932	7.23638e-05	0.00120286
ENSBTAG00000010158	nitric oxide synthase 1 adaptor protein [Source:VGNC Symbol;Acc:VGNC:55636]	NOS1AP	2.71492	3.2402	7.37842e-05	0.00122358
ENSBTAG00000049375	#NA	#NA	3.25605	1.90847	7.4617e-05	0.00123467
ENSBTAG00000013918	adhesion G protein-coupled receptor L3 [Source:VGNC Symbol;Acc:VGNC:53686]	ADGRL3	4.08839	1.01395	7.52796e-05	0.00124216
ENSBTAG00000038715	#NA	#NA	4.01236	-0.195358	7.52127e-05	0.00124216
ENSBTAG00000031069	sorting nexin 24 [Source:VGNC Symbol;Acc:VGNC:35103]	SNX24	2.3502	4.33937	7.63087e-05	0.00125601
ENSBTAG00000025398	ubiquitin D [Source:NCBI gene (formerly Entrezgene);Acc:504548]	0	2.69199	0.358762	7.64065e-05	0.00125606
ENSBTAG00000000218	mitogen-activated protein kinase kinase 5 [Source:VGNC Symbol;Acc:VGNC:31186]	MAP2K5	1.9426	3.79551	7.68343e-05	0.00126153
ENSBTAG00000013095	forkhead box N1 [Source:VGNC Symbol;Acc:VGNC:29095]	FOXN1	1.80284	3.91182	7.73609e-05	0.0012686
ENSBTAG00000001078	sarcalumenin [Source:NCBI gene (formerly Entrezgene);Acc:513912]	SRL	2.58704	4.68012	7.75224e-05	0.00126968
ENSBTAG00000014156	antagonist of mitotic exit network 1 homolog [Source:VGNC Symbol;Acc:VGNC:52604]	AMN1	2.54659	2.17968	7.78204e-05	0.00127195
ENSBTAG00000018566	secreted frizzled related protein 5 [Source:VGNC Symbol;Acc:VGNC:34523]	SFRP5	2.88044	1.60317	7.78532e-05	0.00127195
ENSBTAG00000021829	GM2 ganglioside activator [Source:VGNC Symbol;Acc:VGNC:29431]	GM2A	2.54738	1.87574	8.03074e-05	0.00130882
ENSBTAG00000031178	solute carrier family 9 member A9 [Source:VGNC Symbol;Acc:VGNC:34947]	SLC9A9	6.09097	-0.0302267	8.08442e-05	0.00131595
ENSBTAG00000025589	CDK5 regulatory subunit associated protein 1 like 1 [Source:VGNC Symbol;Acc:VGNC:27137]	CDKAL1	2.21025	3.77792	8.11554e-05	0.0013194
ENSBTAG00000044001	LIM domain containing preferred translocation partner in lipoma [Source:NCBI gene (formerly Entrezgene);Acc:524132]	LPP	2.07079	4.79295	8.19861e-05	0.00133127
ENSBTAG00000014100	BAI1 associated protein 3 [Source:VGNC Symbol;Acc:VGNC:26415]	BAIAP3	2.97078	2.23843	8.31223e-05	0.00134642
ENSBTAG00000016504	ArfGAP with GTPase domain, ankyrin repeat and PH domain 1 [Source:VGNC Symbol;Acc:VGNC:59176]	AGAP1	2.56529	3.88867	8.40043e-05	0.00135739
ENSBTAG00000052204	#NA	#NA	1.79322	4.21849	8.4403e-05	0.00136217
ENSBTAG00000026283	aspartate beta-hydroxylase [Source:VGNC Symbol;Acc:VGNC:26219]	ASPH	2.25795	5.16164	8.50588e-05	0.00136912
ENSBTAG00000018152	myeloid associated differentiation marker [Source:NCBI gene (formerly Entrezgene);Acc:506295]	MYADM	1.65002	8.58739	8.5404e-05	0.00137164
ENSBTAG00000007808	ANTXR cell adhesion molecule 1 [Source:VGNC Symbol;Acc:VGNC:25961]	ANTXR1	1.96895	5.68687	8.59365e-05	0.00137852
ENSBTAG00000010531	cytochrome P450, family 1, subfamily B, polypeptide 1 [Source:NCBI gene (formerly Entrezgene);Acc:511470]	CYP1B1	2.41257	6.53472	8.69302e-05	0.00139115
ENSBTAG00000018105	activin A receptor type 2B [Source:VGNC Symbol;Acc:VGNC:25596]	ACVR2B	2.26114	2.74091	8.8767e-05	0.00141877
ENSBTAG00000017746	slit guidance ligand 3 [Source:VGNC Symbol;Acc:VGNC:34961]	SLIT3	2.60334	4.98673	8.97814e-05	0.00143153
ENSBTAG00000015894	WW domain containing oxidoreductase [Source:VGNC Symbol;Acc:VGNC:36977]	WWOX	2.02446	3.29493	9.08065e-05	0.00144614
ENSBTAG00000002348	solute carrier family 4 member 4 [Source:VGNC Symbol;Acc:VGNC:34894]	SLC4A4	2.77209	4.31194	9.37063e-05	0.00148696
ENSBTAG00000003219	F-box and leucine rich repeat protein 7 [Source:VGNC Symbol;Acc:VGNC:52778]	FBXL7	2.23494	4.29258	9.40513e-05	0.00149065
ENSBTAG00000007492	ADAMTS like 2 [Source:VGNC Symbol;Acc:VGNC:25631]	ADAMTSL2	4.33094	1.57544	9.4651e-05	0.00149836
ENSBTAG00000006256	protein tyrosine phosphatase receptor type O [Source:VGNC Symbol;Acc:VGNC:33555]	PTPRO	3.29366	3.23635	9.50041e-05	0.00150215
ENSBTAG00000007584	inositol polyphosphate-1-phosphatase [Source:VGNC Symbol;Acc:VGNC:30208]	INPP1	1.82023	3.44344	9.55522e-05	0.0015081
ENSBTAG00000012022	TBC1 domain family member 2B [Source:VGNC Symbol;Acc:VGNC:35640]	TBC1D2B	1.65315	7.12688	9.56076e-05	0.0015081
ENSBTAG00000010587	SH3 domain binding glutamate rich protein like [Source:VGNC Symbol;Acc:VGNC:34564]	SH3BGRL	2.23354	5.52265	9.71028e-05	0.00152442
ENSBTAG00000001063	homeobox A4 [Source:VGNC Symbol;Acc:VGNC:29912]	HOXA4	2.33303	3.61611	9.82582e-05	0.00154074
ENSBTAG00000020829	protein tyrosine phosphatase receptor type K [Source:VGNC Symbol;Acc:VGNC:33552]	PTPRK	2.80169	4.14699	9.86712e-05	0.00154538
ENSBTAG00000005028	HIRA interacting protein 3 [Source:VGNC Symbol;Acc:VGNC:29862]	HIRIP3	2.26233	5.20119	0.000100164	0.00156692
ENSBTAG00000030674	adenylate kinase 4 [Source:VGNC Symbol;Acc:VGNC:25773]	AK4	1.84276	4.71401	0.000101206	0.00157948
ENSBTAG00000005845	mannose phosphate isomerase [Source:VGNC Symbol;Acc:VGNC:50218]	MPI	1.62336	5.82471	0.000101873	0.00158615
ENSBTAG00000012729	Cdc42 guanine nucleotide exchange factor 9 [Source:VGNC Symbol;Acc:VGNC:26122]	ARHGEF9	3.69046	2.32406	0.000102115	0.00158806
ENSBTAG00000016549	capping protein regulator and myosin 1 linker 1 [Source:VGNC Symbol;Acc:VGNC:26768]	CARMIL1	1.50406	6.75086	0.000103139	0.0016021
ENSBTAG00000004653	adhesion G protein-coupled receptor A3 [Source:VGNC Symbol;Acc:VGNC:25657]	ADGRA3	1.44957	6.10605	0.000103956	0.00161101
ENSBTAG00000013662	collagen type VIII alpha 1 chain [Source:VGNC Symbol;Acc:VGNC:27574]	COL8A1	1.76864	7.4401	0.000105285	0.0016261
ENSBTAG00000015537	RAS protein activator like 2 [Source:VGNC Symbol;Acc:VGNC:33738]	RASAL2	2.38942	4.65746	0.000105298	0.0016261
ENSBTAG00000008401	6-phosphofructo-2-kinase/fructose-2,6-biphosphatase 3 [Source:VGNC Symbol;Acc:VGNC:32771]	PFKFB3	1.8462	6.23738	0.000107176	0.00165126
ENSBTAG00000009139	low density lipoprotein receptor class A domain containing 4 [Source:VGNC Symbol;Acc:VGNC:30829]	LDLRAD4	2.33972	3.72649	0.000107652	0.00165667
ENSBTAG00000001899	potassium voltage-gated channel subfamily H member 7 [Source:VGNC Symbol;Acc:VGNC:30449]	KCNH7	4.08467	-0.309569	0.000111229	0.00169791
ENSBTAG00000012629	zinc finger protein 362 [Source:VGNC Symbol;Acc:VGNC:37258]	ZNF362	2.02226	3.67205	0.000113044	0.00172362
ENSBTAG00000040427	Rho GTPase activating protein 19 [Source:NCBI gene (formerly Entrezgene);Acc:526945]	0	1.71609	5.30748	0.000115746	0.00175876
ENSBTAG00000054738	#NA	#NA	2.07742	2.86778	0.000117994	0.00178677
ENSBTAG00000022847	HEAT repeat containing 5A [Source:VGNC Symbol;Acc:VGNC:29794]	HEATR5A	1.45658	6.50516	0.000118293	0.00178924
ENSBTAG00000002728	AT-rich interaction domain 1B [Source:VGNC Symbol;Acc:VGNC:26124]	ARID1B	1.49768	6.29271	0.000119904	0.00180948
ENSBTAG00000015493	#NA	#NA	4.00374	1.56499	0.000120094	0.00181028
ENSBTAG00000015296	protein tyrosine phosphatase receptor type B [Source:VGNC Symbol;Acc:VGNC:33545]	PTPRB	4.90315	0.172282	0.00012058	0.00181556
ENSBTAG00000034075	solute carrier family 7 member 11 [Source:VGNC Symbol;Acc:VGNC:34926]	SLC7A11	3.71779	0.948021	0.000121163	0.00182226
ENSBTAG00000031561	arginine and serine rich coiled-coil 1 [Source:VGNC Symbol;Acc:VGNC:53602]	RSRC1	2.16491	5.19313	0.000121455	0.00182458
ENSBTAG00000013420	fibronectin type III and SPRY domain containing 1 like [Source:VGNC Symbol;Acc:VGNC:29130]	FSD1L	2.19999	3.36647	0.000122311	0.00183536
ENSBTAG00000003183	netrin 4 [Source:VGNC Symbol;Acc:VGNC:32306]	NTN4	1.81121	6.71854	0.00012482	0.00186456
ENSBTAG00000009773	kringle containing transmembrane protein 1 [Source:VGNC Symbol;Acc:VGNC:53911]	KREMEN1	1.59855	5.91023	0.000124763	0.00186456
ENSBTAG00000013658	ELKS/RAB6-interacting/CAST family member 1 [Source:VGNC Symbol;Acc:VGNC:28566]	ERC1	1.8005	7.13834	0.000124647	0.00186456
ENSBTAG00000044726	7SK RNA [Source:RFAM;Acc:RF00100]	7SK	2.93222	0.87018	0.000124445	0.00186456
ENSBTAG00000013706	multiple EGF like domains 9 [Source:VGNC Symbol;Acc:VGNC:31377]	MEGF9	1.86817	3.48721	0.000126767	0.00188938
ENSBTAG00000005596	insulin like growth factor binding protein 2 [Source:VGNC Symbol;Acc:VGNC:30084]	IGFBP2	2.36895	8.26068	0.000127016	0.00189097
ENSBTAG00000003791	lysophosphatidic acid receptor 3 [Source:VGNC Symbol;Acc:VGNC:30957]	LPAR3	2.28384	5.66035	0.00013005	0.00192963
ENSBTAG00000018460	ADAM metallopeptidase with thrombospondin type 1 motif 16 [Source:VGNC Symbol;Acc:VGNC:25620]	ADAMTS16	6.50565	-0.0312608	0.00013202	0.00195449
ENSBTAG00000053238	kalirin RhoGEF kinase [Source:NCBI gene (formerly Entrezgene);Acc:540675]	0	3.95641	1.58073	0.000132445	0.0019586
ENSBTAG00000002395	HPS3 biogenesis of lysosomal organelles complex 2 subunit 1 [Source:VGNC Symbol;Acc:VGNC:29944]	HPS3	1.58206	4.26561	0.000132816	0.00196134
ENSBTAG00000013300	potassium calcium-activated channel subfamily M alpha 1 [Source:VGNC Symbol;Acc:VGNC:30479]	KCNMA1	2.38036	3.91447	0.000133966	0.00197228
ENSBTAG00000003877	zinc finger CCHC-type containing 24 [Source:VGNC Symbol;Acc:VGNC:54513]	ZCCHC24	1.69987	3.9973	0.000134199	0.00197351
ENSBTAG00000002880	sorbin and SH3 domain containing 1 [Source:VGNC Symbol;Acc:VGNC:55972]	SORBS1	2.15649	3.91604	0.000136841	0.00200348
ENSBTAG00000000905	RAB6B, member RAS oncogene family [Source:VGNC Symbol;Acc:VGNC:50013]	RAB6B	1.69712	4.99308	0.000137331	0.00200843
ENSBTAG00000017616	adenylosuccinate synthase 1 [Source:VGNC Symbol;Acc:VGNC:25701]	ADSS1	2.15617	2.96283	0.000138969	0.00203015
ENSBTAG00000008172	egl-9 family hypoxia inducible factor 3 [Source:VGNC Symbol;Acc:VGNC:28367]	EGLN3	1.96084	3.33827	0.000140135	0.00204492
ENSBTAG00000017815	syntaxin 8 [Source:VGNC Symbol;Acc:VGNC:35444]	STX8	1.71096	3.72443	0.000141573	0.00206363
ENSBTAG00000005208	C-type lectin domain containing 16A [Source:VGNC Symbol;Acc:VGNC:27426]	CLEC16A	1.78931	5.0097	0.000145831	0.00211855
ENSBTAG00000031184	cyclin dependent kinase inhibitor 1C [Source:VGNC Symbol;Acc:VGNC:27144]	CDKN1C	2.9168	2.54326	0.00014598	0.00211855
ENSBTAG00000010667	phosphoinositide-3-kinase interacting protein 1 [Source:VGNC Symbol;Acc:VGNC:32893]	PIK3IP1	2.18702	3.71805	0.000146288	0.0021207
ENSBTAG00000004432	chordin like 1 [Source:VGNC Symbol;Acc:VGNC:84868]	CHRDL1	1.82345	4.32337	0.000147266	0.00213254
ENSBTAG00000021307	BCL2 interacting protein 3 like [Source:VGNC Symbol;Acc:VGNC:26534]	BNIP3L	1.79145	5.45713	0.000148191	0.00214359
ENSBTAG00000017776	chromodomain helicase DNA binding protein 2 [Source:VGNC Symbol;Acc:VGNC:27278]	CHD2	1.82749	6.35446	0.000152171	0.00219637
ENSBTAG00000018300	TNF receptor superfamily member 19 [Source:VGNC Symbol;Acc:VGNC:53840]	TNFRSF19	1.74939	4.62789	0.000155397	0.00223563
ENSBTAG00000044185	SRY-box transcription factor 6 [Source:VGNC Symbol;Acc:VGNC:35150]	SOX6	3.2061	1.72996	0.000156481	0.00224878
ENSBTAG00000008336	hippocalcin [Source:VGNC Symbol;Acc:VGNC:29936]	HPCA	1.713	3.70992	0.000158421	0.00227418
ENSBTAG00000018707	LIM domain binding 3 [Source:VGNC Symbol;Acc:VGNC:30823]	LDB3	3.51815	-0.0270983	0.000161064	0.00230464
ENSBTAG00000002309	chondroitin sulfate proteoglycan 5 [Source:VGNC Symbol;Acc:VGNC:27770]	CSPG5	2.17686	3.79444	0.000164705	0.0023466
ENSBTAG00000049641	ecto-NOX disulfide-thiol exchanger 2 [Source:NCBI gene (formerly Entrezgene);Acc:100848511]	ENOX2	2.34307	1.71273	0.000166233	0.00236108
ENSBTAG00000009974	t-SNARE domain containing 1 [Source:VGNC Symbol;Acc:VGNC:36423]	TSNARE1	2.53631	2.94672	0.00016923	0.00240074
ENSBTAG00000003923	G protein-coupled bile acid receptor 1 [Source:VGNC Symbol;Acc:VGNC:29521]	GPBAR1	3.17813	1.75384	0.000171971	0.00243441
ENSBTAG00000003696	BICD family like cargo adaptor 1 [Source:VGNC Symbol;Acc:VGNC:56814]	BICDL1	2.58874	1.99752	0.000175854	0.00248409
ENSBTAG00000001151	amyloid beta precursor like protein 1 [Source:VGNC Symbol;Acc:VGNC:26019]	APLP1	1.81993	5.61066	0.000178102	0.00251315
ENSBTAG00000011185	tetratricopeptide repeat domain 23 [Source:VGNC Symbol;Acc:VGNC:36461]	TTC23	3.0398	1.67807	0.000185455	0.0026081
ENSBTAG00000048631	TIAM Rac1 associated GEF 1 [Source:NCBI gene (formerly Entrezgene);Acc:536517]	0	3.37118	3.01527	0.000185618	0.0026081
ENSBTAG00000017697	cardiotrophin 1 [Source:VGNC Symbol;Acc:VGNC:27793]	CTF1	2.12224	4.46713	0.000186299	0.0026149
ENSBTAG00000009845	inositol-tetrakisphosphate 1-kinase [Source:VGNC Symbol;Acc:VGNC:30343]	ITPK1	1.8962	4.41743	0.000186506	0.00261503
ENSBTAG00000025443	folliculin interacting protein 1 [Source:VGNC Symbol;Acc:VGNC:29068]	FNIP1	1.86027	6.61974	0.000192217	0.00269226
ENSBTAG00000001128	ring finger protein 165 [Source:VGNC Symbol;Acc:VGNC:34032]	RNF165	3.74271	0.305233	0.000193401	0.00270598
ENSBTAG00000011140	family with sequence similarity 162 member A [Source:VGNC Symbol;Acc:VGNC:28744]	FAM162A	1.6776	6.35649	0.000194456	0.00271215
ENSBTAG00000008419	#NA	#NA	3.31355	-0.333224	0.000196735	0.00273817
ENSBTAG00000004011	galactokinase 2 [Source:VGNC Symbol;Acc:VGNC:29220]	GALK2	1.65039	3.80701	0.000198413	0.00275285
ENSBTAG00000007163	solute carrier family 44 member 1 [Source:VGNC Symbol;Acc:VGNC:56984]	SLC44A1	1.43398	6.43366	0.000198293	0.00275285
ENSBTAG00000013485	zinc finger FYVE-type containing 19 [Source:VGNC Symbol;Acc:VGNC:37175]	ZFYVE19	1.66804	3.23261	0.000198324	0.00275285
ENSBTAG00000017103	mitogen-activated protein kinase kinase kinase 13 [Source:VGNC Symbol;Acc:VGNC:31191]	MAP3K13	2.21061	3.68272	0.000199807	0.00276929
ENSBTAG00000007066	transmembrane O-mannosyltransferase targeting cadherins 4 [Source:VGNC Symbol;Acc:VGNC:36148]	TMTC4	1.49295	4.83546	0.000201205	0.00278284
ENSBTAG00000007429	sphingolipid transporter 2 [Source:NCBI gene (formerly Entrezgene);Acc:613889]	SPNS2	2.29321	1.58952	0.00020332	0.00280623
ENSBTAG00000003955	#NA	#NA	7.17346	-0.574171	0.000206032	0.00284072
ENSBTAG00000050417	apolipoprotein L3 [Source:NCBI gene (formerly Entrezgene);Acc:788334]	0	2.41993	0.836765	0.000207009	0.00284825
ENSBTAG00000002178	periplakin [Source:VGNC Symbol;Acc:VGNC:33208]	PPL	1.7092	6.65929	0.000210921	0.00289907
ENSBTAG00000021867	beaded filament structural protein 1 [Source:VGNC Symbol;Acc:VGNC:26478]	BFSP1	1.92664	2.99467	0.000213595	0.00293278
ENSBTAG00000001061	protein kinase C alpha [Source:VGNC Symbol;Acc:VGNC:33327]	PRKCA	1.70014	6.28844	0.000214528	0.00294254
ENSBTAG00000018361	R3H domain containing 2 [Source:NCBI gene (formerly Entrezgene);Acc:613499]	R3HDM2	1.93389	7.32249	0.000215529	0.00294787
ENSBTAG00000046838	#NA	#NA	4.78385	1.42142	0.000215584	0.00294787
ENSBTAG00000002531	Rho GTPase activating protein 10 [Source:VGNC Symbol;Acc:VGNC:26074]	ARHGAP10	1.45243	6.23296	0.000218554	0.00297619
ENSBTAG00000014551	TNF alpha induced protein 8 [Source:VGNC Symbol;Acc:VGNC:36157]	TNFAIP8	1.87604	3.93025	0.000218478	0.00297619
ENSBTAG00000055250	#NA	#NA	4.00919	-0.608458	0.000218351	0.00297619
ENSBTAG00000013160	GDNF family receptor alpha 4 [Source:VGNC Symbol;Acc:VGNC:56187]	GFRA4	2.55029	1.95458	0.000220654	0.00299863
ENSBTAG00000001100	interleukin 22 receptor subunit alpha 1 [Source:VGNC Symbol;Acc:VGNC:30144]	IL22RA1	2.45005	2.3871	0.000221587	0.00300741
ENSBTAG00000046220	hypoxanthine-guanine phosphoribosyltransferase [Source:NCBI gene (formerly Entrezgene);Acc:510369]	0	2.7033	1.01091	0.000221981	0.00300741
ENSBTAG00000048329	#NA	#NA	2.24401	2.14598	0.000221921	0.00300741
ENSBTAG00000015467	family with sequence similarity 184 member A [Source:VGNC Symbol;Acc:VGNC:28765]	FAM184A	3.56298	-0.298416	0.000225208	0.0030449
ENSBTAG00000014081	NBAS subunit of NRZ tethering complex [Source:VGNC Symbol;Acc:VGNC:81691]	NBAS	1.47041	5.44257	0.000228318	0.00307753
ENSBTAG00000050122	#NA	#NA	2.7987	1.54888	0.00023058	0.00309856
ENSBTAG00000047749	#NA	#NA	6.07004	-0.472096	0.000231725	0.0031108
ENSBTAG00000007335	tumor protein D52 [Source:NCBI gene (formerly Entrezgene);Acc:540235]	TPD52	1.76831	6.48251	0.000232273	0.00311499
ENSBTAG00000014091	Rho guanine nucleotide exchange factor 3 [Source:VGNC Symbol;Acc:VGNC:26115]	ARHGEF3	1.67902	5.04978	0.000232513	0.00311507
ENSBTAG00000009174	hydroxysteroid 17-beta dehydrogenase 14 [Source:VGNC Symbol;Acc:VGNC:29972]	HSD17B14	2.77781	0.731031	0.000233289	0.0031223
ENSBTAG00000014126	unk like zinc finger [Source:VGNC Symbol;Acc:VGNC:58618]	UNKL	1.55401	4.85407	0.000240784	0.00320964
ENSBTAG00000016546	poly(ADP-ribose) polymerase family member 12 [Source:NCBI gene (formerly Entrezgene);Acc:513185]	PARP12	1.5022	4.94893	0.0002425	0.00322927
ENSBTAG00000002179	CDAN1 interacting nuclease 1 [Source:VGNC Symbol;Acc:VGNC:52611]	CDIN1	1.69809	3.86127	0.000245927	0.00327162
ENSBTAG00000001649	zinc finger protein, FOG family member 2 [Source:VGNC Symbol;Acc:VGNC:54515]	ZFPM2	2.26656	4.92828	0.000247678	0.00328174
ENSBTAG00000005519	ring finger protein 38 [Source:VGNC Symbol;Acc:VGNC:34064]	RNF38	2.03128	4.96407	0.000247312	0.00328174
ENSBTAG00000032097	F-box protein 21 [Source:VGNC Symbol;Acc:VGNC:28898]	FBXO21	1.43586	8.5232	0.000247165	0.00328174
ENSBTAG00000000496	#NA	#NA	4.57682	-0.0583868	0.000250122	0.0033042
ENSBTAG00000004879	forkhead box O4 [Source:VGNC Symbol;Acc:VGNC:29100]	FOXO4	1.95662	5.18261	0.000252386	0.00332748
ENSBTAG00000050709	diaphanous related formin 2 [Source:NCBI gene (formerly Entrezgene);Acc:112445004]	0	2.53817	4.89289	0.000253885	0.00334391
ENSBTAG00000036262	1,4-alpha-glucan branching enzyme 1 [Source:VGNC Symbol;Acc:VGNC:53570]	GBE1	2.05529	5.56297	0.000256284	0.00337216
ENSBTAG00000014250	zinc finger CCCH-type containing, antiviral 1 like [Source:VGNC Symbol;Acc:VGNC:37112]	ZC3HAV1L	2.07222	5.90759	0.000256934	0.00337735
ENSBTAG00000049965	#NA	#NA	4.90155	-0.659874	0.000257484	0.00338123
ENSBTAG00000000942	signal induced proliferation associated 1 like 2 [Source:VGNC Symbol;Acc:VGNC:34629]	SIPA1L2	2.94972	1.95512	0.000258677	0.00338683
ENSBTAG00000049198	#NA	#NA	3.73126	-0.671822	0.000260829	0.00341164
ENSBTAG00000010023	family with sequence similarity 107 member B [Source:VGNC Symbol;Acc:VGNC:57007]	FAM107B	1.87683	5.07808	0.000261139	0.00341232
ENSBTAG00000001257	ATP/GTP binding protein 1 [Source:VGNC Symbol;Acc:VGNC:25744]	AGTPBP1	2.78264	1.73708	0.000262252	0.00341887
ENSBTAG00000053455	#NA	#NA	3.27046	-0.397666	0.000264145	0.00343804
ENSBTAG00000054498	#NA	#NA	3.09834	-0.0417686	0.000266329	0.00346306
ENSBTAG00000021741	ribosomal protein S6 kinase A2 [Source:VGNC Symbol;Acc:VGNC:34141]	RPS6KA2	2.41465	3.21887	0.000269729	0.00350383
ENSBTAG00000006599	inhibin subunit beta E [Source:VGNC Symbol;Acc:VGNC:30203]	INHBE	3.05567	2.51607	0.000274368	0.00355365
ENSBTAG00000009611	PHD finger protein 21A [Source:VGNC Symbol;Acc:VGNC:32821]	PHF21A	1.83426	5.05505	0.000276579	0.00357878
ENSBTAG00000003185	ArfGAP with SH3 domain, ankyrin repeat and PH domain 1 [Source:VGNC Symbol;Acc:VGNC:26184]	ASAP1	1.82718	6.13133	0.000278998	0.00360305
ENSBTAG00000013664	filamin A interacting protein 1 like [Source:VGNC Symbol;Acc:VGNC:29013]	FILIP1L	2.37157	7.51612	0.000280045	0.00361304
ENSBTAG00000006121	#NA	#NA	4.32818	-0.10817	0.000280522	0.00361568
ENSBTAG00000054933	#NA	#NA	3.40198	0.277956	0.000288702	0.00369952
ENSBTAG00000053558	notum, palmitoleoyl-protein carboxylesterase [Source:NCBI gene (formerly Entrezgene);Acc:525682]	NOTUM	1.92697	2.7261	0.000289772	0.00370964
ENSBTAG00000008551	#NA	#NA	4.95066	0.0778801	0.000298052	0.00380234
ENSBTAG00000016191	zinc finger protein 32 [Source:VGNC Symbol;Acc:VGNC:37247]	ZNF32	2.20664	1.94552	0.000297791	0.00380234
ENSBTAG00000016240	ring finger protein 157 [Source:VGNC Symbol;Acc:VGNC:34031]	RNF157	1.50619	5.24396	0.00029816	0.00380234
ENSBTAG00000055120	oligophrenin 1 [Source:NCBI gene (formerly Entrezgene);Acc:525644]	OPHN1	2.95613	2.21369	0.00030299	0.0038528
ENSBTAG00000048125	ectonucleoside triphosphate diphosphohydrolase 2 [Source:VGNC Symbol;Acc:VGNC:28509]	ENTPD2	2.41968	1.27976	0.000308371	0.00391747
ENSBTAG00000005017	zinc finger protein 169 [Source:VGNC Symbol;Acc:VGNC:37214]	ZNF169	2.685	0.614964	0.000311162	0.00394914
ENSBTAG00000052187	#NA	#NA	5.01162	-0.823142	0.000311695	0.00395211
ENSBTAG00000049411	dehydrogenase/reductase X-linked [Source:NCBI gene (formerly Entrezgene);Acc:513482]	0	1.87693	2.92695	0.000312046	0.00395279
ENSBTAG00000002938	cadherin like and PC-esterase domain containing 1 [Source:VGNC Symbol;Acc:VGNC:27651]	CPED1	2.16643	3.10604	0.000313521	0.00396768
ENSBTAG00000018077	#NA	#NA	2.80322	-0.409857	0.000315209	0.00398523
ENSBTAG00000015403	tripeptidyl peptidase 1 [Source:VGNC Symbol;Acc:VGNC:36256]	TPP1	1.94805	7.79365	0.000315566	0.00398594
ENSBTAG00000000140	epoxide hydrolase 1 [Source:VGNC Symbol;Acc:VGNC:28541]	EPHX1	2.2401	3.77863	0.000316795	0.00399385
ENSBTAG00000020605	smoothelin like 2 [Source:VGNC Symbol;Acc:VGNC:35037]	SMTNL2	1.70465	5.54822	0.000320111	0.00402417
ENSBTAG00000019993	#NA	#NA	4.58184	0.0278501	0.000328187	0.00411399
ENSBTAG00000018404	protein kinase cGMP-dependent 1 [Source:VGNC Symbol;Acc:VGNC:33340]	PRKG1	5.78528	0.910903	0.000329385	0.0041251
ENSBTAG00000022991	neurobeachin [Source:VGNC Symbol;Acc:VGNC:31893]	NBEA	2.25435	3.18162	0.000330439	0.00413439
ENSBTAG00000005280	adenosine deaminase [Source:VGNC Symbol;Acc:VGNC:25600]	ADA	1.52057	3.12646	0.000334679	0.00417955
ENSBTAG00000047676	proline dehydrogenase (oxidase) 1 [Source:NCBI gene (formerly Entrezgene);Acc:505094]	PRODH	2.19394	6.65696	0.000335994	0.00419202
ENSBTAG00000016486	sorbin and SH3 domain containing 2 [Source:HGNC Symbol;Acc:HGNC:24098]	SORBS2	2.14249	3.95635	0.000336976	0.00419962
ENSBTAG00000018520	sodium voltage-gated channel alpha subunit 1 [Source:VGNC Symbol;Acc:VGNC:34345]	SCN1A	2.82334	2.00535	0.000337237	0.00419962
ENSBTAG00000006064	break repair meiotic recombinase recruitment factor 1 [Source:VGNC Symbol;Acc:VGNC:52729]	BRME1	2.38816	1.94024	0.000348076	0.00431836
ENSBTAG00000054238	#NA	#NA	2.23104	1.4751	0.000348515	0.00431976
ENSBTAG00000016470	NAD synthetase 1 [Source:VGNC Symbol;Acc:VGNC:31865]	NADSYN1	1.69319	4.64229	0.000349206	0.00431981
ENSBTAG00000049814	#NA	#NA	1.74672	3.68107	0.000350279	0.00432543
ENSBTAG00000005807	mitochondrial calcium uptake 1 [Source:VGNC Symbol;Acc:VGNC:31461]	MICU1	1.55795	5.88905	0.000354393	0.00437216
ENSBTAG00000005163	S100 calcium binding protein A1 [Source:VGNC Symbol;Acc:VGNC:34236]	S100A1	2.0896	1.98045	0.000355383	0.00437455
ENSBTAG00000023464	#NA	#NA	3.2371	1.54677	0.000363652	0.00446975
ENSBTAG00000016109	dehydrogenase/reductase 12 [Source:VGNC Symbol;Acc:VGNC:28041]	DHRS12	2.08675	1.97255	0.000365816	0.00449218
ENSBTAG00000047709	#NA	#NA	4.84945	-1.14122	0.000366917	0.00450152
ENSBTAG00000012687	insulin receptor [Source:VGNC Symbol;Acc:VGNC:30221]	INSR	2.43172	1.54358	0.000369209	0.00452546
ENSBTAG00000002076	staufen double-stranded RNA binding protein 2 [Source:NCBI gene (formerly Entrezgene);Acc:100125233]	STAU2	1.46726	5.51298	0.000369902	0.00452976
ENSBTAG00000009153	MLX interacting protein like [Source:VGNC Symbol;Acc:VGNC:31510]	MLXIPL	3.16271	1.01628	0.000373234	0.00456635
ENSBTAG00000015715	#NA	#NA	2.71359	1.19933	0.000376743	0.00460502
ENSBTAG00000015776	major facilitator superfamily domain containing 14A [Source:VGNC Symbol;Acc:VGNC:54453]	MFSD14A	1.56794	6.7872	0.000377917	0.00461512
ENSBTAG00000014455	PDZ domain containing 2 [Source:VGNC Symbol;Acc:VGNC:32725]	PDZD2	4.78473	0.712984	0.000379634	0.00462755
ENSBTAG00000009867	#NA	#NA	5.07322	-0.374275	0.000381727	0.00464805
ENSBTAG00000047357	ring finger protein 208 [Source:VGNC Symbol;Acc:VGNC:34049]	RNF208	2.53657	2.33377	0.000382017	0.00464805
ENSBTAG00000006132	DENN domain containing 3 [Source:VGNC Symbol;Acc:VGNC:27998]	DENND3	1.49354	6.4923	0.000388272	0.0047155
ENSBTAG00000007353	distal-less homeobox 4 [Source:VGNC Symbol;Acc:VGNC:28100]	DLX4	1.76825	4.44198	0.000390303	0.00473581
ENSBTAG00000034712	RAB33A, member RAS oncogene family [Source:VGNC Symbol;Acc:VGNC:33642]	RAB33A	2.53552	1.2882	0.00039157	0.00474685
ENSBTAG00000015788	coiled-coil domain containing 171 [Source:VGNC Symbol;Acc:VGNC:26868]	CCDC171	2.40279	1.09155	0.000392113	0.00474909
ENSBTAG00000005261	Fc fragment of IgG binding protein [Source:NCBI gene (formerly Entrezgene);Acc:534348]	0	2.53329	1.46016	0.000393275	0.00475636
ENSBTAG00000015985	G protein-coupled receptor 20 [Source:VGNC Symbol;Acc:VGNC:29579]	GPR20	6.31783	-0.654756	0.000393452	0.00475636
ENSBTAG00000031778	H2B clustered histone 5 [Source:VGNC Symbol;Acc:VGNC:83560]	H2BC5	2.41662	3.18654	0.000398369	0.00480728
ENSBTAG00000048263	leucine rich repeat containing 56 [Source:VGNC Symbol;Acc:VGNC:31023]	LRRC56	2.40518	0.905888	0.000401282	0.00483802
ENSBTAG00000039055	ankyrin repeat domain 65 [Source:VGNC Symbol;Acc:VGNC:25941]	ANKRD65	2.9176	0.0827758	0.00040353	0.00485628
ENSBTAG00000008497	regulator of G protein signaling 14 [Source:VGNC Symbol;Acc:VGNC:33914]	RGS14	2.11363	2.47688	0.00040415	0.00485708
ENSBTAG00000023182	WNK lysine deficient protein kinase 3 [Source:VGNC Symbol;Acc:VGNC:36951]	WNK3	3.26794	0.931217	0.000404329	0.00485708
ENSBTAG00000038134	zinc finger DHHC-type containing 1 [Source:VGNC Symbol;Acc:VGNC:37126]	ZDHHC1	2.08091	2.83521	0.00040803	0.00489267
ENSBTAG00000004971	GRAM domain containing 1C [Source:VGNC Symbol;Acc:VGNC:29624]	GRAMD1C	1.91876	1.78134	0.000408514	0.00489404
ENSBTAG00000019062	FCH and double SH3 domains 2 [Source:VGNC Symbol;Acc:VGNC:28937]	FCHSD2	1.69623	4.28088	0.000416144	0.00496748
ENSBTAG00000033766	keratin 16 [Source:VGNC Symbol;Acc:VGNC:50397]	KRT16	2.94529	1.66508	0.000421675	0.0050272
ENSBTAG00000049048	#NA	#NA	2.37408	0.213094	0.000421905	0.0050272
ENSBTAG00000001598	microtubule associated protein 7 [Source:VGNC Symbol;Acc:VGNC:31210]	MAP7	2.33068	2.03473	0.000425146	0.00505219
ENSBTAG00000020286	GRB2 associated regulator of MAPK1 subtype 1 [Source:VGNC Symbol;Acc:VGNC:29252]	GAREM1	5.17755	0.591254	0.000426938	0.00506893
ENSBTAG00000020148	TEK receptor tyrosine kinase [Source:VGNC Symbol;Acc:VGNC:35735]	TEK	3.53858	1.11463	0.000428782	0.00508627
ENSBTAG00000010029	ELKS/RAB6-interacting/CAST family member 2 [Source:VGNC Symbol;Acc:VGNC:28567]	ERC2	4.07314	0.158424	0.000436416	0.0051722
ENSBTAG00000013103	collagen type I alpha 1 chain [Source:VGNC Symbol;Acc:VGNC:27560]	COL1A1	1.45512	12.56	0.00043882	0.00519603
ENSBTAG00000039275	endoplasmic reticulum aminopeptidase 2 [Source:VGNC Symbol;Acc:VGNC:28561]	ERAP2	1.63298	3.61575	0.000440343	0.00520941
ENSBTAG00000007053	zinc finger homeobox 2 [Source:VGNC Symbol;Acc:VGNC:37156]	ZFHX2	1.59845	3.6156	0.000445948	0.00527102
ENSBTAG00000012969	dickkopf WNT signaling pathway inhibitor 2 [Source:VGNC Symbol;Acc:VGNC:28080]	DKK2	1.98191	4.75728	0.000454921	0.00535796
ENSBTAG00000040473	protocadherin gamma subfamily A, 3 [Source:HGNC Symbol;Acc:HGNC:8701]	PCDHGA3	1.88986	2.13322	0.000462146	0.0054334
ENSBTAG00000031941	peptidase D [Source:VGNC Symbol;Acc:VGNC:32747]	PEPD	1.85491	5.06996	0.000463588	0.00543587
ENSBTAG00000035827	autophagy related 7 [Source:VGNC Symbol;Acc:VGNC:26261]	ATG7	1.64694	3.52604	0.000463361	0.00543587
ENSBTAG00000044195	sidekick cell adhesion molecule 2 [Source:VGNC Symbol;Acc:VGNC:34394]	SDK2	2.97709	0.557545	0.000469659	0.00549593
ENSBTAG00000048719	#NA	#NA	3.87514	0.386423	0.000469954	0.00549593
ENSBTAG00000007554	interferon alpha inducible protein 6 [Source:VGNC Symbol;Acc:VGNC:30047]	IFI6	2.00691	2.65689	0.000470942	0.00549806
ENSBTAG00000047491	calcium voltage-gated channel subunit alpha1 S [Source:VGNC Symbol;Acc:VGNC:59326]	CACNA1S	2.2366	2.27524	0.000474262	0.00553166
ENSBTAG00000003498	FAT atypical cadherin 2 [Source:VGNC Symbol;Acc:VGNC:58375]	FAT2	1.80175	3.37711	0.000475489	0.0055411
ENSBTAG00000014944	#NA	#NA	2.97581	0.512289	0.000479889	0.00558746
ENSBTAG00000018342	tight junction protein 3 [Source:VGNC Symbol;Acc:VGNC:35883]	TJP3	2.19797	2.00096	0.000480809	0.00559326
ENSBTAG00000013760	collagen type IV alpha 6 chain [Source:VGNC Symbol;Acc:VGNC:27567]	COL4A6	1.84879	6.18454	0.000481555	0.00559702
ENSBTAG00000000088	activated leukocyte cell adhesion molecule [Source:VGNC Symbol;Acc:VGNC:25805]	ALCAM	1.75052	7.05272	0.00048479	0.00562968
ENSBTAG00000006679	melanocyte inducing transcription factor [Source:VGNC Symbol;Acc:VGNC:31487]	MITF	7.10554	-0.166564	0.000500699	0.00580426
ENSBTAG00000021318	secretory carrier membrane protein 5 [Source:VGNC Symbol;Acc:VGNC:34319]	SCAMP5	2.19936	0.477257	0.000504493	0.00583802
ENSBTAG00000017666	ATP binding cassette subfamily C member 5 [Source:VGNC Symbol;Acc:VGNC:25474]	ABCC5	1.4083	5.74694	0.000507148	0.00585851
ENSBTAG00000026812	aldehyde oxidase 2 [Source:NCBI gene (formerly Entrezgene);Acc:531699]	AOX2	3.13721	0.759582	0.000507016	0.00585851
ENSBTAG00000039657	#NA	#NA	3.42122	1.02086	0.00050766	0.00585932
ENSBTAG00000005710	neural cell adhesion molecule 1 [Source:VGNC Symbol;Acc:VGNC:31898]	NCAM1	1.99952	8.54673	0.000510963	0.00589231
ENSBTAG00000034875	alpha kinase 1 [Source:VGNC Symbol;Acc:VGNC:25847]	ALPK1	2.36838	2.5931	0.000515442	0.00593363
ENSBTAG00000011147	ring finger protein 13 [Source:VGNC Symbol;Acc:VGNC:34020]	RNF13	1.51227	5.47335	0.000520278	0.0059841
ENSBTAG00000011397	unc-13 homolog B [Source:VGNC Symbol;Acc:VGNC:56987]	UNC13B	1.73632	4.03817	0.000525768	0.00603676
ENSBTAG00000008550	GTPase, IMAP family member 7 [Source:NCBI gene (formerly Entrezgene);Acc:100125415]	GIMAP7	2.95495	3.91761	0.000531622	0.0060987
ENSBTAG00000039335	arrestin domain containing 2 [Source:VGNC Symbol;Acc:VGNC:26172]	ARRDC2	1.69877	4.91063	0.000537187	0.00615188
ENSBTAG00000026676	syndecan 3 [Source:VGNC Symbol;Acc:VGNC:34380]	SDC3	1.64073	5.60619	0.000542111	0.00620291
ENSBTAG00000025659	zinc finger protein 618 [Source:VGNC Symbol;Acc:VGNC:37314]	ZNF618	2.23839	2.83719	0.000542765	0.00620503
ENSBTAG00000020373	CFAP20 domain containing [Source:NCBI gene (formerly Entrezgene);Acc:534800]	CFAP20DC	3.35472	1.14202	0.000544902	0.00622409
ENSBTAG00000020054	TNF receptor superfamily member 21 [Source:VGNC Symbol;Acc:VGNC:36166]	TNFRSF21	1.56115	9.13381	0.000547548	0.00624893
ENSBTAG00000053194	#NA	#NA	1.95797	0.991803	0.000548167	0.00625061
ENSBTAG00000051936	#NA	#NA	3.30356	0.503577	0.000554428	0.00631115
ENSBTAG00000020079	mitogen-activated protein kinase kinase kinase 4 [Source:VGNC Symbol;Acc:VGNC:31197]	MAP3K4	1.40476	6.87504	0.000564936	0.00640874
ENSBTAG00000048628	hedgehog acyltransferase [Source:NCBI gene (formerly Entrezgene);Acc:100336796]	HHAT	4.28641	0.903286	0.000583011	0.00658559
ENSBTAG00000033679	holocarboxylase synthetase [Source:VGNC Symbol;Acc:VGNC:50274]	HLCS	1.65226	2.98141	0.00058452	0.00659217
ENSBTAG00000012280	#NA	#NA	2.9435	0.088251	0.000595063	0.00670458
ENSBTAG00000049661	#NA	#NA	1.72954	1.78537	0.000599095	0.00673855
ENSBTAG00000003261	aurora kinase C [Source:NCBI gene (formerly Entrezgene);Acc:618599]	AURKC	1.89091	2.05636	0.000603458	0.00677611
ENSBTAG00000024470	#NA	#NA	6.51539	-1.31241	0.000609595	0.00683345
ENSBTAG00000021697	platelet derived growth factor subunit B [Source:VGNC Symbol;Acc:VGNC:32690]	PDGFB	1.93636	3.40644	0.000611607	0.0068502
ENSBTAG00000054820	#NA	#NA	3.12451	-0.382238	0.000613112	0.00685551
ENSBTAG00000013004	inter-alpha-trypsin inhibitor heavy chain 5 [Source:VGNC Symbol;Acc:VGNC:30337]	ITIH5	2.03945	6.42659	0.000616044	0.00688245
ENSBTAG00000002996	shroom family member 4 [Source:VGNC Symbol;Acc:VGNC:34610]	SHROOM4	1.78632	3.86327	0.000621616	0.00692751
ENSBTAG00000017805	calcium release activated channel regulator 2B [Source:VGNC Symbol;Acc:VGNC:56262]	CRACR2B	2.75501	0.402585	0.000621487	0.00692751
ENSBTAG00000046580	DExH-box helicase 58 [Source:VGNC Symbol;Acc:VGNC:28058]	DHX58	1.82457	3.30685	0.000621646	0.00692751
ENSBTAG00000053294	#NA	#NA	2.08896	1.02765	0.000622937	0.00693606
ENSBTAG00000015181	EPM2A glucan phosphatase, laforin [Source:VGNC Symbol;Acc:VGNC:53790]	EPM2A	4.2101	-0.642432	0.00063038	0.00701304
ENSBTAG00000048049	#NA	#NA	2.91199	-0.296243	0.000634298	0.00705071
ENSBTAG00000002028	divergent protein kinase domain 1A [Source:VGNC Symbol;Acc:VGNC:28824]	DIPK1A	1.60812	4.53835	0.000641378	0.0071216
ENSBTAG00000015187	DEAD-box helicase 41 [Source:VGNC Symbol;Acc:VGNC:27967]	DDX41	1.43146	6.6447	0.000643973	0.00714029
ENSBTAG00000018020	G protein subunit alpha transducin 1 [Source:VGNC Symbol;Acc:VGNC:29454]	GNAT1	1.78897	3.72314	0.000646523	0.00715213
ENSBTAG00000025078	leucine rich repeat containing 75A [Source:VGNC Symbol;Acc:VGNC:31028]	LRRC75A	5.96746	-0.492282	0.000647667	0.00715729
ENSBTAG00000006918	tousled like kinase 1 [Source:VGNC Symbol;Acc:VGNC:35893]	TLK1	1.69186	6.11356	0.000652355	0.00719708
ENSBTAG00000037756	tet methylcytosine dioxygenase 1 [Source:VGNC Symbol;Acc:VGNC:55994]	TET1	2.04679	3.633	0.000661109	0.00728154
ENSBTAG00000015419	Rho guanine nucleotide exchange factor 37 [Source:VGNC Symbol;Acc:VGNC:26116]	ARHGEF37	1.65022	3.04686	0.000663616	0.00730308
ENSBTAG00000014806	ATPase sarcoplasmic/endoplasmic reticulum Ca2+ transporting 3 [Source:VGNC Symbol;Acc:VGNC:26292]	ATP2A3	1.70023	3.31966	0.000670299	0.00736439
ENSBTAG00000002020	CREB3 regulatory factor [Source:VGNC Symbol;Acc:VGNC:27700]	CREBRF	1.8409	3.5441	0.000673486	0.00739328
ENSBTAG00000009617	solute carrier family 2 member 1 [Source:VGNC Symbol;Acc:VGNC:34796]	SLC2A1	1.66066	6.25323	0.000682371	0.00747768
ENSBTAG00000019866	neuropilin 1 [Source:VGNC Symbol;Acc:VGNC:32266]	NRP1	1.55122	5.8068	0.000682415	0.00747768
ENSBTAG00000002069	MHC class I heavy chain [Source:NCBI gene (formerly Entrezgene);Acc:515712]	BOLA	1.44915	6.28418	0.000693091	0.00758336
ENSBTAG00000049704	#NA	#NA	2.85129	-0.316483	0.000706495	0.00770457
ENSBTAG00000044053	solute carrier family 17 member 5 [Source:VGNC Symbol;Acc:VGNC:34700]	SLC17A5	1.3901	4.84833	0.00070812	0.00771595
ENSBTAG00000003992	LIM homeobox 4 [Source:VGNC Symbol;Acc:VGNC:30874]	LHX4	3.80612	-0.0917887	0.000714081	0.00777451
ENSBTAG00000003608	#NA	#NA	3.45528	-0.499869	0.000715477	0.00778331
ENSBTAG00000052898	#NA	#NA	2.6255	0.233762	0.000716565	0.00778875
ENSBTAG00000024426	protein phosphatase 1 regulatory subunit 9A [Source:VGNC Symbol;Acc:VGNC:33250]	PPP1R9A	2.00064	3.51552	0.000731514	0.00793822
ENSBTAG00000033680	centrosomal protein 112 [Source:VGNC Symbol;Acc:VGNC:27190]	CEP112	1.84464	3.55479	0.000733769	0.00795617
ENSBTAG00000009457	#NA	#NA	3.70793	-0.867144	0.000739405	0.00801073
ENSBTAG00000007665	natriuretic peptide receptor 3 [Source:NCBI gene (formerly Entrezgene);Acc:281358]	NPR3	1.96311	8.64477	0.000745792	0.00807247
ENSBTAG00000021790	apolipoprotein O like [Source:VGNC Symbol;Acc:VGNC:26036]	APOOL	1.98697	3.18366	0.000746323	0.00807247
ENSBTAG00000016107	phosphate cytidylyltransferase 1, choline, beta [Source:VGNC Symbol;Acc:VGNC:32653]	PCYT1B	2.24351	0.757786	0.000749808	0.00808377
ENSBTAG00000019953	cytochrome b-245 beta chain [Source:VGNC Symbol;Acc:VGNC:50265]	CYBB	4.48693	-0.137306	0.000755574	0.00813931
ENSBTAG00000026234	serine/threonine kinase 3 [Source:VGNC Symbol;Acc:VGNC:35393]	STK3	1.59282	5.65373	0.000772304	0.00829722
ENSBTAG00000039341	zinc finger protein 525 [Source:NCBI gene (formerly Entrezgene);Acc:100296121]	0	1.72924	2.75446	0.000772738	0.00829722
ENSBTAG00000006587	zinc finger protein 367 [Source:VGNC Symbol;Acc:VGNC:37260]	ZNF367	1.69798	5.62908	0.000781581	0.0083786
ENSBTAG00000007668	1-acylglycerol-3-phosphate O-acyltransferase 4 [Source:VGNC Symbol;Acc:VGNC:25737]	AGPAT4	2.11805	1.14565	0.000787149	0.00843146
ENSBTAG00000020495	SH3 and SYLF domain containing 1 [Source:VGNC Symbol;Acc:VGNC:34584]	SH3YL1	1.6557	3.60342	0.000794874	0.00850733
ENSBTAG00000003531	#NA	#NA	2.72597	0.235628	0.000796587	0.00851191
ENSBTAG00000005871	MDS1 and EVI1 complex locus [Source:VGNC Symbol;Acc:VGNC:31343]	MECOM	3.51661	-0.561524	0.000796518	0.00851191
ENSBTAG00000000207	pseudouridine 5'-phosphatase [Source:VGNC Symbol;Acc:VGNC:33568]	PUDP	1.44012	5.2054	0.000804074	0.00858499
ENSBTAG00000006610	X-ray radiation resistance associated 1 [Source:VGNC Symbol;Acc:VGNC:37010]	XRRA1	2.12916	1.10174	0.000804779	0.0085856
ENSBTAG00000013173	#NA	#NA	3.6256	-0.860669	0.000811813	0.00865368
ENSBTAG00000014391	crumbs cell polarity complex component 2 [Source:VGNC Symbol;Acc:VGNC:27689]	CRB2	2.2662	7.42549	0.000814042	0.00867047
ENSBTAG00000004165	citramalyl-CoA lyase [Source:VGNC Symbol;Acc:VGNC:27475]	CLYBL	2.07203	2.84418	0.000817356	0.00869178
ENSBTAG00000014548	niban apoptosis regulator 1 [Source:VGNC Symbol;Acc:VGNC:28726]	NIBAN1	2.01528	2.00615	0.000819945	0.00870535
ENSBTAG00000006528	Bardet-Biedl syndrome 9 [Source:NCBI gene (formerly Entrezgene);Acc:535387]	BBS9	2.39473	1.48239	0.000831733	0.00882258
ENSBTAG00000011056	iduronate 2-sulfatase [Source:NCBI gene (formerly Entrezgene);Acc:541272]	IDS	1.69309	5.10562	0.000832319	0.00882258
ENSBTAG00000019350	solute carrier family 25 member 21 [Source:VGNC Symbol;Acc:VGNC:34749]	SLC25A21	5.48888	0.309422	0.000847765	0.00896479
ENSBTAG00000000986	USH1 protein network component harmonin [Source:VGNC Symbol;Acc:VGNC:36704]	USH1C	1.58805	3.49645	0.000854973	0.00903381
ENSBTAG00000039524	#NA	#NA	2.49288	2.23205	0.000868317	0.0091602
ENSBTAG00000049665	UDP-GlcNAc:betaGal beta-1,3-N-acetylglucosaminyltransferase 9 [Source:NCBI gene (formerly Entrezgene);Acc:614717]	B3GNT9	1.80161	2.45375	0.000869033	0.00916045
ENSBTAG00000016094	solute carrier family 36 member 1 [Source:VGNC Symbol;Acc:VGNC:34838]	SLC36A1	1.48092	4.51064	0.000872231	0.00917955
ENSBTAG00000015246	#NA	#NA	6.25475	-1.15626	0.00088082	0.00926259
ENSBTAG00000012550	TAO kinase 3 [Source:VGNC Symbol;Acc:VGNC:35597]	TAOK3	1.72297	6.57238	0.000899475	0.00942947
ENSBTAG00000014882	DNA methyltransferase 3 like [Source:NCBI gene (formerly Entrezgene);Acc:613785]	0	2.22426	0.132796	0.000900247	0.00942947
ENSBTAG00000020357	golgi phosphoprotein 3 like [Source:VGNC Symbol;Acc:VGNC:29493]	GOLPH3L	1.47166	4.3946	0.000900032	0.00942947
ENSBTAG00000046612	zinc finger protein 292 [Source:VGNC Symbol;Acc:VGNC:37239]	ZNF292	1.95154	6.89978	0.00091154	0.00953268
ENSBTAG00000021940	coiled-coil domain containing 149 [Source:VGNC Symbol;Acc:VGNC:26855]	CCDC149	4.03705	0.504271	0.00091882	0.00959367
ENSBTAG00000050527	#NA	#NA	3.04526	4.13906	0.000925177	0.00965244
ENSBTAG00000001615	RUN domain containing 3A [Source:VGNC Symbol;Acc:VGNC:34218]	RUNDC3A	1.92552	1.70628	0.000936386	0.0097617
ENSBTAG00000016230	bromodomain and WD repeat domain containing 3 [Source:VGNC Symbol;Acc:VGNC:26576]	BRWD3	1.9201	5.56631	0.000937531	0.00976595
ENSBTAG00000014020	rhotekin 2 [Source:VGNC Symbol;Acc:VGNC:34198]	RTKN2	1.82301	5.35286	0.000942512	0.00981012
ENSBTAG00000049022	#NA	#NA	4.34251	-1.04808	0.000943977	0.00981766
ENSBTAG00000019855	mitogen-activated protein kinase kinase kinase 15 [Source:VGNC Symbol;Acc:VGNC:31193]	MAP3K15	1.58999	3.28554	0.000951413	0.00988723
ENSBTAG00000054832	#NA	#NA	3.71025	-0.313788	0.000960407	0.00994949
ENSBTAG00000005978	#NA	#NA	3.96923	-0.338281	0.000966942	0.0100094
ENSBTAG00000021903	KIAA0319 [Source:VGNC Symbol;Acc:VGNC:30548]	KIAA0319	1.9726	1.70057	0.000972019	0.0100541
ENSBTAG00000001492	FYN binding protein 1 [Source:VGNC Symbol;Acc:VGNC:29160]	FYB1	3.17286	0.578867	0.000983871	0.0101687
ENSBTAG00000008721	MANSC domain containing 1 [Source:VGNC Symbol;Acc:VGNC:31172]	MANSC1	1.5624	5.54424	0.000986091	0.0101837
ENSBTAG00000032774	adipogenesis regulatory factor [Source:VGNC Symbol;Acc:VGNC:25680]	ADIRF	1.65753	7.39	0.00100481	0.0103609
ENSBTAG00000010786	transforming acidic coiled-coil containing protein 2 [Source:VGNC Symbol;Acc:VGNC:35558]	TACC2	1.45265	6.03971	0.00101443	0.0104394
ENSBTAG00000038079	chromosome 16 C1orf21 homolog [Source:NCBI gene (formerly Entrezgene);Acc:781721]	C16H1orf21	2.63952	1.60496	0.00101479	0.0104394
ENSBTAG00000006893	BBX high mobility group box domain containing [Source:VGNC Symbol;Acc:VGNC:26433]	BBX	1.72763	6.93041	0.00101679	0.0104519
ENSBTAG00000010508	biliverdin reductase B [Source:VGNC Symbol;Acc:VGNC:26511]	BLVRB	1.41919	6.22802	0.00102461	0.0104997
ENSBTAG00000005866	zinc finger protein 81 [Source:VGNC Symbol;Acc:VGNC:37352]	ZNF81	1.93323	0.678365	0.00102899	0.010512
ENSBTAG00000013105	synaptotagmin 3 [Source:VGNC Symbol;Acc:VGNC:35542]	SYT3	2.46203	-0.249981	0.00102747	0.010512
ENSBTAG00000054635	#NA	#NA	1.93278	3.12025	0.0010288	0.010512
ENSBTAG00000005526	component of oligomeric golgi complex 5 [Source:VGNC Symbol;Acc:VGNC:53634]	COG5	1.59758	4.12991	0.00103145	0.010527
ENSBTAG00000011500	calsequestrin 2 [Source:VGNC Symbol;Acc:VGNC:26787]	CASQ2	3.34939	0.139519	0.00105175	0.0107115
ENSBTAG00000012265	von Willebrand factor [Source:VGNC Symbol;Acc:VGNC:36860]	VWF	1.95823	3.70292	0.00105961	0.010775
ENSBTAG00000001981	solute carrier family 6 member 17 [Source:VGNC Symbol;Acc:VGNC:50163]	SLC6A17	1.63906	6.57846	0.00106233	0.0107944
ENSBTAG00000049610	zinc finger protein 234 [Source:HGNC Symbol;Acc:HGNC:13027]	ZNF234	1.85012	2.79461	0.00106739	0.0108374
ENSBTAG00000013007	family with sequence similarity 210 member B [Source:VGNC Symbol;Acc:VGNC:28789]	FAM210B	1.49524	6.42597	0.00106886	0.0108433
ENSBTAG00000020119	ring finger protein 43 [Source:VGNC Symbol;Acc:VGNC:34068]	RNF43	1.50584	3.59567	0.0010696	0.0108433
ENSBTAG00000014062	#NA	#NA	6.00896	-1.1485	0.00109761	0.0111018
ENSBTAG00000001102	serpin family B member 10 [Source:VGNC Symbol;Acc:VGNC:56372]	SERPINB10	2.24939	4.94828	0.00110245	0.0111253
ENSBTAG00000014354	FXYD domain containing ion transport regulator 6 [Source:VGNC Symbol;Acc:VGNC:54871]	FXYD6	1.40419	7.39985	0.00110351	0.0111275
ENSBTAG00000003836	ADAM metallopeptidase domain 19 [Source:VGNC Symbol;Acc:VGNC:25608]	ADAM19	1.43811	5.44363	0.00110646	0.0111403
ENSBTAG00000044073	CD248 molecule [Source:VGNC Symbol;Acc:VGNC:27017]	CD248	2.00491	3.41213	0.00110768	0.0111441
ENSBTAG00000009384	angiotensin II receptor associated protein [Source:VGNC Symbol;Acc:VGNC:25747]	AGTRAP	1.50185	5.78335	0.00111298	0.0111889
ENSBTAG00000015164	solute carrier family 27 member 5 [Source:VGNC Symbol;Acc:VGNC:34789]	SLC27A5	2.29478	0.256191	0.00111821	0.0112287
ENSBTAG00000017644	kinesin family member 17 [Source:VGNC Symbol;Acc:VGNC:30586]	KIF17	2.12469	0.983682	0.00111864	0.0112287
ENSBTAG00000053603	#NA	#NA	2.09514	0.0689249	0.00112033	0.0112372
ENSBTAG00000007149	NYN domain and retroviral integrase containing [Source:VGNC Symbol;Acc:VGNC:32387]	NYNRIN	1.80296	4.44805	0.00113173	0.011343
ENSBTAG00000014597	zinc finger SWIM-type containing 9 [Source:VGNC Symbol;Acc:VGNC:52274]	ZSWIM9	1.87553	1.96972	0.00113414	0.0113585
ENSBTAG00000009055	ring finger protein 144B [Source:VGNC Symbol;Acc:VGNC:34027]	RNF144B	3.14044	0.555046	0.00114445	0.0114487
ENSBTAG00000018946	niban apoptosis regulator 3 [Source:VGNC Symbol;Acc:VGNC:55221]	NIBAN3	2.14438	0.862739	0.00114573	0.0114487
ENSBTAG00000052290	#NA	#NA	2.60908	0.335916	0.0011457	0.0114487
ENSBTAG00000017122	heparan sulfate proteoglycan 2 [Source:VGNC Symbol;Acc:VGNC:29988]	HSPG2	1.68175	9.95344	0.00115843	0.0115581
ENSBTAG00000005657	calcium/calmodulin dependent protein kinase II inhibitor 2 [Source:VGNC Symbol;Acc:VGNC:26724]	CAMK2N2	1.84088	2.41607	0.0011627	0.0115833
ENSBTAG00000011374	#NA	#NA	5.25173	-0.726918	0.00116782	0.0116255
ENSBTAG00000010976	KN motif and ankyrin repeat domains 1 [Source:VGNC Symbol;Acc:VGNC:56976]	KANK1	1.49248	7.77747	0.00117694	0.0116988
ENSBTAG00000006991	#NA	#NA	6.76381	-1.1602	0.00118774	0.0117941
ENSBTAG00000052148	#NA	#NA	4.27843	0.231576	0.00118831	0.0117941
ENSBTAG00000046101	zinc finger protein 470 [Source:NCBI gene (formerly Entrezgene);Acc:444866]	ZNF470	1.86567	3.04536	0.00121364	0.0120275
ENSBTAG00000044074	MLLT10 histone lysine methyltransferase DOT1L cofactor [Source:VGNC Symbol;Acc:VGNC:58389]	MLLT10	1.59291	5.50337	0.00122221	0.0121033
ENSBTAG00000052072	UDP-GlcNAc:betaGal beta-1,3-N-acetylglucosaminyltransferase like 1 [Source:NCBI gene (formerly Entrezgene);Acc:617397]	B3GNTL1	2.44875	0.681953	0.0012329	0.0122001
ENSBTAG00000050110	#NA	#NA	1.52534	3.34714	0.00123446	0.0122064
ENSBTAG00000007494	SWI/SNF related, matrix associated, actin dependent regulator of chromatin, subfamily a, member 2 [Source:VGNC Symbol;Acc:VGNC:34986]	SMARCA2	1.60811	8.21303	0.00123775	0.0122207
ENSBTAG00000006212	GTF2I repeat domain containing 1 [Source:VGNC Symbol;Acc:VGNC:29700]	GTF2IRD1	1.6773	3.30944	0.00124006	0.0122253
ENSBTAG00000015926	#NA	#NA	4.43305	-0.387794	0.00124	0.0122253
ENSBTAG00000027444	supervillin [Source:NCBI gene (formerly Entrezgene);Acc:281509]	SVIL	2.03883	5.35997	0.00129218	0.0127202
ENSBTAG00000030973	tubulin, alpha 3d [Source:NCBI gene (formerly Entrezgene);Acc:535605]	TUBA1D	2.39749	1.68043	0.00129756	0.0127636
ENSBTAG00000000130	TNF superfamily member 13 [Source:VGNC Symbol;Acc:VGNC:55879]	TNFSF13	1.655	3.34404	0.00129991	0.0127773
ENSBTAG00000015615	thymocyte selection associated [Source:VGNC Symbol;Acc:VGNC:35835]	THEMIS	4.11178	0.794213	0.00131223	0.0128698
ENSBTAG00000010395	dedicator of cytokinesis 9 [Source:VGNC Symbol;Acc:VGNC:28163]	DOCK9	1.51669	6.27638	0.00132549	0.0129806
ENSBTAG00000025062	MAGE family member E2 [Source:VGNC Symbol;Acc:VGNC:31144]	MAGEE2	3.7297	-0.447267	0.00132486	0.0129806
ENSBTAG00000000422	teashirt zinc finger homeobox 1 [Source:VGNC Symbol;Acc:VGNC:56375]	TSHZ1	1.5724	4.76535	0.00132662	0.0129821
ENSBTAG00000011733	GIPC PDZ domain containing family member 2 [Source:VGNC Symbol;Acc:VGNC:29366]	GIPC2	2.31085	1.38552	0.0013412	0.0130957
ENSBTAG00000049842	#NA	#NA	1.89694	3.64344	0.00134531	0.0131176
ENSBTAG00000013869	SH3 domain binding protein 4 [Source:VGNC Symbol;Acc:VGNC:34567]	SH3BP4	1.35887	8.16984	0.00135414	0.0131929
ENSBTAG00000014382	KN motif and ankyrin repeat domains 4 [Source:VGNC Symbol;Acc:VGNC:55243]	KANK4	1.91854	4.81065	0.00136586	0.0132778
ENSBTAG00000014803	carboxypeptidase Z [Source:VGNC Symbol;Acc:VGNC:27683]	CPZ	1.8566	2.12479	0.00136549	0.0132778
ENSBTAG00000052140	allograft inflammatory factor 1 like [Source:VGNC Symbol;Acc:VGNC:25760]	AIF1L	1.51078	7.11538	0.00136867	0.0132954
ENSBTAG00000019822	tubulin polymerization promoting protein family member 3 [Source:VGNC Symbol;Acc:VGNC:36260]	TPPP3	2.29762	3.4378	0.00137962	0.0133919
ENSBTAG00000037964	H2A.W histone [Source:VGNC Symbol;Acc:VGNC:83612]	H2AW	2.54114	1.42722	0.00139234	0.0134956
ENSBTAG00000045868	ZFP37 zinc finger protein [Source:HGNC Symbol;Acc:HGNC:12863]	ZFP37	2.45865	0.856834	0.00140841	0.0136116
ENSBTAG00000008504	synaptogyrin 3 [Source:VGNC Symbol;Acc:VGNC:35525]	SYNGR3	1.87867	3.23921	0.00142119	0.0136951
ENSBTAG00000021739	natriuretic peptide B [Source:VGNC Symbol;Acc:VGNC:32211]	NPPB	1.84308	3.4939	0.00142402	0.0137124
ENSBTAG00000003806	extracellular matrix protein 1 [Source:VGNC Symbol;Acc:VGNC:28311]	ECM1	1.47722	5.1886	0.0014349	0.0137971
ENSBTAG00000053696	#NA	#NA	3.08706	0.479681	0.0014458	0.0138817
ENSBTAG00000054572	paternally expressed 3 [Source:NCBI gene (formerly Entrezgene);Acc:444864]	PEG3	2.81988	0.513909	0.00145679	0.0139469
ENSBTAG00000000601	collagen type XI alpha 2 chain [Source:VGNC Symbol;Acc:VGNC:27554]	COL11A2	2.08275	2.76495	0.00147612	0.0141115
ENSBTAG00000048159	TGF-beta activated kinase 1 (MAP3K7) binding protein 3 [Source:VGNC Symbol;Acc:VGNC:56955]	TAB3	1.98079	5.85757	0.00147748	0.0141144
ENSBTAG00000018749	nudix hydrolase 16 [Source:VGNC Symbol;Acc:VGNC:32330]	NUDT16	1.78578	1.60027	0.00148924	0.0142063
ENSBTAG00000002356	RNA binding motif protein 47 [Source:VGNC Symbol;Acc:VGNC:33804]	RBM47	1.45137	5.89295	0.00149348	0.0142262
ENSBTAG00000052146	Myb/SANT DNA binding domain containing 3 [Source:NCBI gene (formerly Entrezgene);Acc:534309]	MSANTD3	1.9981	1.17744	0.00149275	0.0142262
ENSBTAG00000001707	ubiquitin interaction motif containing 1 [Source:VGNC Symbol;Acc:VGNC:36657]	UIMC1	1.5939	4.79123	0.00149977	0.0142758
ENSBTAG00000012228	semaphorin 4A [Source:VGNC Symbol;Acc:VGNC:34433]	SEMA4A	2.86723	2.84342	0.00151786	0.0144169
ENSBTAG00000010111	transcription factor 7 like 1 [Source:VGNC Symbol;Acc:VGNC:58419]	TCF7L1	1.50695	4.92815	0.00153708	0.014589
ENSBTAG00000017682	tet methylcytosine dioxygenase 2 [Source:VGNC Symbol;Acc:VGNC:35757]	TET2	1.68548	6.17514	0.0015486	0.0146799
ENSBTAG00000013880	WW and C2 domain containing 1 [Source:VGNC Symbol;Acc:VGNC:36974]	WWC1	1.46206	7.94047	0.00155172	0.0146859
ENSBTAG00000014187	protein phosphatase, Mg2+/Mn2+ dependent 1N (putative) [Source:NCBI gene (formerly Entrezgene);Acc:530233]	PPM1N	1.77526	1.45622	0.00155082	0.0146859
ENSBTAG00000012290	sodium channel epithelial 1 subunit beta [Source:VGNC Symbol;Acc:VGNC:34356]	SCNN1B	1.82932	4.92898	0.00156755	0.0148146
ENSBTAG00000016462	transcription factor 4 [Source:VGNC Symbol;Acc:VGNC:35694]	TCF4	1.49328	4.54962	0.00157287	0.0148331
ENSBTAG00000049318	#NA	#NA	2.58854	0.716392	0.00158595	0.0149246
ENSBTAG00000000664	solute carrier family 22 member 15 [Source:VGNC Symbol;Acc:VGNC:34723]	SLC22A15	1.86992	1.45842	0.00160412	0.0150742
ENSBTAG00000007152	OS9 endoplasmic reticulum lectin [Source:VGNC Symbol;Acc:VGNC:32455]	OS9	1.37979	7.22821	0.00160563	0.0150777
ENSBTAG00000024199	lysine methyltransferase 2C [Source:VGNC Symbol;Acc:VGNC:30692]	KMT2C	1.53083	6.72647	0.00161254	0.0151319
ENSBTAG00000005667	#NA	#NA	2.10096	0.58414	0.00161686	0.015151
ENSBTAG00000007384	cytohesin 3 [Source:VGNC Symbol;Acc:VGNC:58371]	CYTH3	1.35982	7.06752	0.00161806	0.0151515
ENSBTAG00000030864	family with sequence similarity 228 member B [Source:NCBI gene (formerly Entrezgene);Acc:100125925]	FAM228B	1.94258	1.07022	0.00162095	0.0151677
ENSBTAG00000016740	ATP citrate lyase [Source:VGNC Symbol;Acc:VGNC:25543]	ACLY	1.62074	9.04194	0.00166197	0.0155188
ENSBTAG00000013724	autophagy related 4A cysteine peptidase [Source:VGNC Symbol;Acc:VGNC:26257]	ATG4A	1.67956	3.77008	0.00169283	0.0157847
ENSBTAG00000008101	proprotein convertase subtilisin/kexin type 5 [Source:VGNC Symbol;Acc:VGNC:56979]	PCSK5	1.54692	5.09207	0.00170095	0.0158336
ENSBTAG00000008877	amyloid beta precursor protein binding family A member 1 [Source:VGNC Symbol;Acc:VGNC:26000]	APBA1	3.67963	-0.01813	0.00170927	0.0158598
ENSBTAG00000009942	phospholipase C like 2 [Source:VGNC Symbol;Acc:VGNC:32992]	PLCL2	2.73816	1.69576	0.00171604	0.0159115
ENSBTAG00000016165	keratin 7 [Source:VGNC Symbol;Acc:VGNC:30734]	KRT7	1.70983	5.58425	0.00172577	0.0159793
ENSBTAG00000021703	mediator complex subunit 12L [Source:VGNC Symbol;Acc:VGNC:53588]	MED12L	2.14947	1.54658	0.0017254	0.0159793
ENSBTAG00000004870	polypeptide N-acetylgalactosaminyltransferase 2 [Source:VGNC Symbol;Acc:VGNC:29231]	GALNT2	1.3388	7.81313	0.00174305	0.0161056
ENSBTAG00000000393	sarcospan [Source:VGNC Symbol;Acc:VGNC:35317]	SSPN	2.08015	1.43856	0.00174786	0.0161388
ENSBTAG00000000024	dymeclin [Source:VGNC Symbol;Acc:VGNC:28269]	DYM	1.425	5.90593	0.00175101	0.0161506
ENSBTAG00000000240	A-kinase anchoring protein 7 [Source:VGNC Symbol;Acc:VGNC:25788]	AKAP7	1.84022	1.80677	0.00176112	0.0162206
ENSBTAG00000011266	zinc finger and BTB domain containing 16 [Source:VGNC Symbol;Acc:VGNC:37062]	ZBTB16	1.57572	5.05805	0.00177797	0.0163371
ENSBTAG00000012020	TNF receptor associated factor 5 [Source:VGNC Symbol;Acc:VGNC:36277]	TRAF5	1.56024	4.81594	0.00178856	0.016423
ENSBTAG00000001687	#NA	#NA	4.29185	-0.716556	0.00180571	0.0165576
ENSBTAG00000006851	#NA	#NA	3.18066	-0.253539	0.00182939	0.0167399
ENSBTAG00000014913	steroid 5 alpha-reductase 3 [Source:VGNC Symbol;Acc:VGNC:35273]	SRD5A3	1.70205	3.08397	0.00183233	0.0167553
ENSBTAG00000022890	myelin basic protein [Source:VGNC Symbol;Acc:VGNC:54450]	MBP	1.81114	2.95557	0.00183917	0.0168062
ENSBTAG00000040215	eukaryotic translation initiation factor 4 gamma 3 [Source:VGNC Symbol;Acc:VGNC:28417]	EIF4G3	1.60602	8.16284	0.00186817	0.0170477
ENSBTAG00000019665	interleukin 1 receptor antagonist [Source:VGNC Symbol;Acc:VGNC:30136]	IL1RN	2.28434	0.598851	0.00187387	0.0170705
ENSBTAG00000034077	agouti signaling protein [Source:VGNC Symbol;Acc:VGNC:26214]	ASIP	1.47515	4.75707	0.00187765	0.0170871
ENSBTAG00000031041	non-homologous end joining factor 1 [Source:VGNC Symbol;Acc:VGNC:32064]	NHEJ1	1.5933	3.00647	0.00188154	0.0171025
ENSBTAG00000016878	WD repeat domain 59 [Source:VGNC Symbol;Acc:VGNC:36907]	WDR59	1.3529	4.71147	0.00188612	0.0171202
ENSBTAG00000015739	mannose receptor C type 2 [Source:VGNC Symbol;Acc:VGNC:31599]	MRC2	1.66791	7.55255	0.00189835	0.0171929
ENSBTAG00000027446	Ras suppressor protein 1 [Source:VGNC Symbol;Acc:VGNC:57022]	RSU1	1.39881	7.05632	0.0018973	0.0171929
ENSBTAG00000047004	UBAP1-MVB12-associated (UMA) domain containing 1 [Source:NCBI gene (formerly Entrezgene);Acc:100137763]	UMAD1	1.62066	2.45988	0.00193338	0.0174624
ENSBTAG00000015961	tetraspanin 2 [Source:VGNC Symbol;Acc:VGNC:36435]	TSPAN2	1.70215	3.57238	0.00194271	0.0175347
ENSBTAG00000046257	GTPase, IMAP family member 4 [Source:NCBI gene (formerly Entrezgene);Acc:510751]	GIMAP4	1.68162	5.63829	0.00195078	0.0175955
ENSBTAG00000006470	tau tubulin kinase 2 [Source:VGNC Symbol;Acc:VGNC:36452]	TTBK2	1.54249	4.47828	0.00195356	0.0176086
ENSBTAG00000053383	#NA	#NA	3.99763	-0.733203	0.0019659	0.0177078
ENSBTAG00000010957	phospholysine phosphohistidine inorganic pyrophosphate phosphatase [Source:VGNC Symbol;Acc:VGNC:30870]	LHPP	1.80688	4.24759	0.00197537	0.0177617
ENSBTAG00000047262	keratin 42 [Source:VGNC Symbol;Acc:VGNC:50431]	KRT42	1.88288	3.23268	0.00197581	0.0177617
ENSBTAG00000049733	ataxin 7 like 1 [Source:NCBI gene (formerly Entrezgene);Acc:534448]	ATXN7L1	1.58495	2.66296	0.00197725	0.0177617
ENSBTAG00000001026	beta-carotene oxygenase 1 [Source:VGNC Symbol;Acc:VGNC:26453]	BCO1	4.05363	-0.850539	0.00197951	0.01777
ENSBTAG00000016497	family with sequence similarity 168 member A [Source:VGNC Symbol;Acc:VGNC:28752]	FAM168A	1.49094	4.50804	0.00198972	0.0178375
ENSBTAG00000054988	#NA	#NA	1.75829	1.84898	0.00198928	0.0178375
ENSBTAG00000016442	mitogen-activated protein kinase kinase kinase kinase 3 [Source:VGNC Symbol;Acc:VGNC:31206]	MAP4K3	1.63436	6.55393	0.00199234	0.0178489
ENSBTAG00000019722	guanylate cyclase 2C [Source:VGNC Symbol;Acc:VGNC:29722]	GUCY2C	2.96618	2.2962	0.00200191	0.0179104
ENSBTAG00000035705	myotubularin related protein 8 [Source:VGNC Symbol;Acc:VGNC:56931]	MTMR8	2.11464	0.964665	0.00200476	0.0179238
ENSBTAG00000002205	#NA	#NA	2.50902	-0.72101	0.00201473	0.0179886
ENSBTAG00000021975	PATJ crumbs cell polarity complex component [Source:VGNC Symbol;Acc:VGNC:32592]	PATJ	1.7408	6.04651	0.00203121	0.0181114
ENSBTAG00000011463	MID1 interacting protein 1 [Source:VGNC Symbol;Acc:VGNC:31465]	MID1IP1	1.39444	5.66577	0.0020547	0.0183085
ENSBTAG00000047613	HtrA serine peptidase 3 [Source:VGNC Symbol;Acc:VGNC:59337]	HTRA3	1.71736	6.15235	0.00205617	0.0183093
ENSBTAG00000053371	#NA	#NA	3.70931	-0.991896	0.00205844	0.0183172
ENSBTAG00000004688	24-dehydrocholesterol reductase [Source:VGNC Symbol;Acc:VGNC:28033]	DHCR24	1.62984	7.52011	0.00206792	0.018389
ENSBTAG00000039708	apical junction component 1 homolog [Source:VGNC Symbol;Acc:VGNC:49537]	AJM1	2.70914	2.85111	0.00206929	0.018389
ENSBTAG00000001132	glycosyltransferase like domain containing 1 [Source:VGNC Symbol;Acc:VGNC:29690]	GTDC1	3.58624	1.58481	0.00207497	0.0184272
ENSBTAG00000038549	phylloquinone omega-hydroxylase CYP4F2 [Source:NCBI gene (formerly Entrezgene);Acc:509506]	0	3.06268	2.29605	0.00208169	0.0184745
ENSBTAG00000010652	#NA	#NA	3.19278	-0.549668	0.00208703	0.0185095
ENSBTAG00000032519	calmodulin-lysine N-methyltransferase [Source:VGNC Symbol;Acc:VGNC:26727]	CAMKMT	2.21363	1.17375	0.00209299	0.0185499
ENSBTAG00000046321	TSPO associated protein 1 [Source:VGNC Symbol;Acc:VGNC:55881]	TSPOAP1	2.21949	1.70696	0.00215149	0.0190302
ENSBTAG00000015195	NPC intracellular cholesterol transporter 1 [Source:VGNC Symbol;Acc:VGNC:32194]	NPC1	1.38242	6.52276	0.00216276	0.0191171
ENSBTAG00000008728	myocardin related transcription factor B [Source:VGNC Symbol;Acc:VGNC:31489]	MRTFB	1.69284	3.9086	0.00217631	0.0192145
ENSBTAG00000000369	epidermal growth factor receptor pathway substrate 8 [Source:VGNC Symbol;Acc:VGNC:28555]	EPS8	1.5597	5.00821	0.00220126	0.0194186
ENSBTAG00000012157	coiled-coil domain containing 158 [Source:VGNC Symbol;Acc:VGNC:26862]	CCDC158	1.78854	2.54617	0.00222469	0.0195992
ENSBTAG00000038795	STARD3 N-terminal like [Source:VGNC Symbol;Acc:VGNC:35364]	STARD3NL	1.48644	2.94867	0.00223967	0.019718
ENSBTAG00000001985	#NA	#NA	2.61074	-0.079395	0.00224145	0.0197206
ENSBTAG00000008021	#NA	#NA	1.91548	0.137065	0.00224699	0.0197562
ENSBTAG00000013882	charged multivesicular body protein 2A [Source:VGNC Symbol;Acc:VGNC:27300]	CHMP2A	1.28505	6.43183	0.00225276	0.0197789
ENSBTAG00000003494	chromosome 13 C20orf194 homolog [Source:VGNC Symbol;Acc:VGNC:49169]	C13H20orf194	1.55137	2.69383	0.0022641	0.019854
ENSBTAG00000011590	GLI pathogenesis related 1 [Source:VGNC Symbol;Acc:VGNC:29402]	GLIPR1	1.97021	1.66118	0.00228547	0.0200148
ENSBTAG00000025767	#NA	#NA	2.89361	-0.832733	0.00229576	0.0200917
ENSBTAG00000003088	LanC like 3 [Source:VGNC Symbol;Acc:VGNC:30785]	LANCL3	3.17111	-0.667653	0.00230561	0.0201646
ENSBTAG00000013462	L1 cell adhesion molecule [Source:VGNC Symbol;Acc:VGNC:30760]	L1CAM	1.75313	4.42912	0.00230883	0.0201794
ENSBTAG00000016076	trafficking kinesin protein 1 [Source:VGNC Symbol;Acc:VGNC:97320]	TRAK1	1.40275	5.99841	0.00231201	0.0201939
ENSBTAG00000054345	#NA	#NA	2.76831	-0.765558	0.00231489	0.0202057
ENSBTAG00000006939	FYVE, RhoGEF and PH domain containing 3 [Source:VGNC Symbol;Acc:VGNC:28966]	FGD3	2.13714	0.550593	0.00232758	0.0202907
ENSBTAG00000006434	synaptopodin 2 [Source:VGNC Symbol;Acc:VGNC:35531]	SYNPO2	1.70224	5.3321	0.00233994	0.0203841
ENSBTAG00000053343	#NA	#NA	6.60163	-1.37428	0.00234755	0.0204369
ENSBTAG00000019672	nucleoside-diphosphate kinase NBR-A [Source:NCBI gene (formerly Entrezgene);Acc:574091]	0	1.55516	3.86409	0.00235676	0.0204768
ENSBTAG00000009349	#NA	#NA	2.93352	-0.499856	0.00239052	0.0207293
ENSBTAG00000001857	docking protein 4 [Source:VGNC Symbol;Acc:VGNC:28168]	DOK4	1.35331	5.67458	0.00239544	0.0207584
ENSBTAG00000021928	divergent protein kinase domain 1B [Source:VGNC Symbol;Acc:VGNC:28825]	DIPK1B	2.3864	1.59257	0.00240077	0.020791
ENSBTAG00000007077	abhydrolase domain containing 1 [Source:VGNC Symbol;Acc:VGNC:25487]	ABHD1	1.6364	2.02261	0.00240734	0.0208343
ENSBTAG00000014933	trafficking kinesin protein 2 [Source:VGNC Symbol;Acc:VGNC:36281]	TRAK2	1.55048	5.53948	0.00241268	0.0208532
ENSBTAG00000018837	solute carrier family 39 member 11 [Source:VGNC Symbol;Acc:VGNC:34859]	SLC39A11	1.45252	4.0449	0.00241205	0.0208532
ENSBTAG00000048740	#NA	#NA	1.98626	-0.0495102	0.00242472	0.0209436
ENSBTAG00000008082	centrosomal protein 350 [Source:VGNC Symbol;Acc:VGNC:27203]	CEP350	1.57777	8.77809	0.00244971	0.0211319
ENSBTAG00000014458	maestro heat like repeat family member 1 [Source:VGNC Symbol;Acc:VGNC:31609]	MROH1	1.77866	6.10309	0.00244857	0.0211319
ENSBTAG00000003983	target of myb1 like 2 membrane trafficking protein [Source:VGNC Symbol;Acc:VGNC:36219]	TOM1L2	1.43724	4.76872	0.00247013	0.0212584
ENSBTAG00000012980	Ras related GTP binding B [Source:VGNC Symbol;Acc:VGNC:34159]	RRAGB	1.45037	4.35842	0.00246898	0.0212584
ENSBTAG00000046608	basic helix-loop-helix family member b9 [Source:NCBI gene (formerly Entrezgene);Acc:107131311]	0	2.95427	-0.154142	0.00246966	0.0212584
ENSBTAG00000052669	cystin 1 [Source:NCBI gene (formerly Entrezgene);Acc:100848673]	CYS1	2.39085	0.475006	0.0024724	0.0212584
ENSBTAG00000003632	cytochrome P450, family 39, subfamily A, polypeptide 1 [Source:NCBI gene (formerly Entrezgene);Acc:511195]	CYP39A1	1.70605	2.2586	0.00248336	0.0213389
ENSBTAG00000025667	astrotactin 2 [Source:NCBI gene (formerly Entrezgene);Acc:781555]	ASTN2	6.07229	-0.60215	0.00250126	0.0214372
ENSBTAG00000050646	#NA	#NA	2.4978	0.223728	0.00250127	0.0214372
ENSBTAG00000025140	double C2 domain beta [Source:VGNC Symbol;Acc:VGNC:57140]	DOC2B	1.68038	2.05589	0.00250392	0.021446
ENSBTAG00000016302	solute carrier family 25 member 27 [Source:VGNC Symbol;Acc:VGNC:34753]	SLC25A27	1.51508	2.91695	0.00251089	0.0214779
ENSBTAG00000050580	#NA	#NA	2.51553	-0.267041	0.00251003	0.0214779
ENSBTAG00000009014	uroplakin 1B [Source:VGNC Symbol;Acc:VGNC:36685]	UPK1B	1.49915	10.2468	0.0025337	0.0216285
ENSBTAG00000020407	MTSS I-BAR domain containing 1 [Source:VGNC Symbol;Acc:VGNC:31752]	MTSS1	2.17246	-0.174036	0.00253335	0.0216285
ENSBTAG00000012443	diaphanous related formin 3 [Source:VGNC Symbol;Acc:VGNC:28062]	DIAPH3	1.72998	7.33726	0.00254932	0.0217364
ENSBTAG00000014381	#NA	#NA	3.24329	-0.838239	0.0025888	0.0220164
ENSBTAG00000017788	AKT serine/threonine kinase 3 [Source:VGNC Symbol;Acc:VGNC:25800]	AKT3	1.62199	3.81943	0.00261062	0.0221877
ENSBTAG00000045711	cysteine rich tail 1 [Source:VGNC Symbol;Acc:VGNC:50272]	CYSRT1	2.78546	2.34065	0.00261392	0.0222016
ENSBTAG00000053029	zinc finger protein 26 [Source:HGNC Symbol;Acc:HGNC:13053]	ZNF26	1.72431	2.87292	0.00264202	0.0223972
ENSBTAG00000046752	proline rich transmembrane protein 2 [Source:NCBI gene (formerly Entrezgene);Acc:112444325]	0	2.23332	4.05255	0.00265759	0.022486
ENSBTAG00000000097	EF-hand calcium binding domain 14 [Source:VGNC Symbol;Acc:VGNC:28342]	EFCAB14	1.35469	6.85356	0.00266384	0.0225187
ENSBTAG00000043996	sterile alpha motif domain containing 12 [Source:VGNC Symbol;Acc:VGNC:34267]	SAMD12	2.97581	1.57182	0.00266486	0.0225187
ENSBTAG00000003509	pleckstrin homology domain containing A2 [Source:VGNC Symbol;Acc:VGNC:33004]	PLEKHA2	1.31567	7.08826	0.00268406	0.0226377
ENSBTAG00000010637	arylsulfatase G [Source:VGNC Symbol;Acc:VGNC:55034]	ARSG	1.5872	4.55479	0.00270328	0.0227708
ENSBTAG00000050754	#NA	#NA	3.68333	-0.887506	0.00272143	0.0229091
ENSBTAG00000009207	lysine methyltransferase 2E (inactive) [Source:VGNC Symbol;Acc:VGNC:30694]	KMT2E	1.62737	8.11044	0.00274002	0.0230509
ENSBTAG00000001877	high mobility group nucleosome binding domain 5 [Source:VGNC Symbol;Acc:VGNC:56709]	HMGN5	1.80369	2.67103	0.00275249	0.0231265
ENSBTAG00000011928	zinc finger and BTB domain containing 20 [Source:VGNC Symbol;Acc:VGNC:37065]	ZBTB20	1.81623	1.49101	0.0027583	0.0231606
ENSBTAG00000003384	centrosomal protein 162 [Source:VGNC Symbol;Acc:VGNC:27195]	CEP162	1.63913	4.72431	0.00284282	0.02381
ENSBTAG00000011124	#NA	#NA	4.23531	-1.08566	0.00284983	0.0238536
ENSBTAG00000020028	retinol binding protein 1 [Source:VGNC Symbol;Acc:VGNC:33812]	RBP1	2.18187	2.95741	0.00285274	0.0238629
ENSBTAG00000054686	CRACD like [Source:VGNC Symbol;Acc:VGNC:102819]	CRACDL	1.61316	3.43809	0.00286703	0.0239673
ENSBTAG00000032148	transmembrane protein 117 [Source:VGNC Symbol;Acc:VGNC:35954]	TMEM117	2.45424	0.234792	0.00288059	0.0240654
ENSBTAG00000011957	cAMP responsive element binding protein like 2 [Source:VGNC Symbol;Acc:VGNC:27699]	CREBL2	1.50158	5.79759	0.00288289	0.0240695
ENSBTAG00000005083	TUB like protein 4 [Source:VGNC Symbol;Acc:VGNC:36522]	TULP4	1.47138	5.12132	0.00288678	0.0240868
ENSBTAG00000011048	spermatogenesis associated 6 like [Source:VGNC Symbol;Acc:VGNC:35190]	SPATA6L	2.19549	0.685158	0.00289386	0.0241306
ENSBTAG00000001567	leucine rich repeat kinase 1 [Source:VGNC Symbol;Acc:VGNC:31037]	LRRK1	1.30476	6.45576	0.00293309	0.0244117
ENSBTAG00000023784	transmembrane protein 88B [Source:VGNC Symbol;Acc:VGNC:36121]	TMEM88B	1.68846	1.7069	0.00294979	0.0245199
ENSBTAG00000018033	phosphatidylinositol-5-phosphate 4-kinase type 2 alpha [Source:VGNC Symbol;Acc:VGNC:32906]	PIP4K2A	1.65522	6.5428	0.00299085	0.02483
ENSBTAG00000054959	#NA	#NA	3.24911	-0.838861	0.00300172	0.024858
ENSBTAG00000009545	protein phosphatase with EF-hand domain 1 [Source:VGNC Symbol;Acc:VGNC:33190]	PPEF1	2.48118	0.0198486	0.00301048	0.0248994
ENSBTAG00000013530	dimethylarginine dimethylaminohydrolase 2 [Source:VGNC Symbol;Acc:VGNC:27940]	DDAH2	1.64248	7.25403	0.00300907	0.0248994
ENSBTAG00000044058	major facilitator superfamily domain containing 8 [Source:VGNC Symbol;Acc:VGNC:31443]	MFSD8	1.39939	3.9073	0.00302111	0.0249717
ENSBTAG00000017694	transcriptional repressor GATA binding 1 [Source:VGNC Symbol;Acc:VGNC:36395]	TRPS1	2.06012	1.61299	0.00302817	0.0249989
ENSBTAG00000018307	semaphorin 3F [Source:VGNC Symbol;Acc:VGNC:34431]	SEMA3F	1.37819	7.05717	0.00303284	0.0250218
ENSBTAG00000027246	#NA	#NA	2.42553	-0.825332	0.00304937	0.0251426
ENSBTAG00000009049	uncharacterized LOC507581 [Source:NCBI gene (formerly Entrezgene);Acc:507581]	0	1.45433	3.62598	0.00307462	0.0252879
ENSBTAG00000030474	#NA	#NA	3.20752	-0.619896	0.00307671	0.0252894
ENSBTAG00000011765	GABA type A receptor associated protein like 1 [Source:VGNC Symbol;Acc:VGNC:56201]	GABARAPL1	1.34935	8.01737	0.00308022	0.0253025
ENSBTAG00000003457	activating transcription factor 5 [Source:VGNC Symbol;Acc:VGNC:26243]	ATF5	1.65594	6.33982	0.00309714	0.02541
ENSBTAG00000001152	TLE family member 6, subcortical maternal complex member [Source:VGNC Symbol;Acc:VGNC:52895]	TLE6	1.73963	3.37592	0.00312056	0.0255705
ENSBTAG00000010763	dual specificity phosphatase 16 [Source:VGNC Symbol;Acc:VGNC:28253]	DUSP16	1.33563	5.61544	0.00312679	0.0255898
ENSBTAG00000021102	galactose mutarotase [Source:VGNC Symbol;Acc:VGNC:29221]	GALM	1.36444	7.62411	0.00312489	0.0255898
ENSBTAG00000012448	coiled-coil domain containing 91 [Source:VGNC Symbol;Acc:VGNC:26932]	CCDC91	1.75461	5.15327	0.00315706	0.0258216
ENSBTAG00000009024	potassium voltage-gated channel subfamily D member 1 [Source:VGNC Symbol;Acc:VGNC:30434]	KCND1	1.65904	2.80038	0.00316398	0.0258623
ENSBTAG00000004732	spectrin beta, erythrocytic [Source:VGNC Symbol;Acc:VGNC:35252]	SPTB	2.53629	0.712585	0.003167	0.025871
ENSBTAG00000052750	#NA	#NA	2.44346	0.126352	0.00317924	0.025955
ENSBTAG00000051886	#NA	#NA	2.00194	2.48763	0.00320928	0.0261465
ENSBTAG00000048448	#NA	#NA	3.18543	-0.0229991	0.00321652	0.0261787
ENSBTAG00000016414	vitamin D receptor [Source:VGNC Symbol;Acc:VGNC:36784]	VDR	1.78241	2.49194	0.00322249	0.0262112
ENSBTAG00000020895	lysyl oxidase like 4 [Source:VGNC Symbol;Acc:VGNC:55958]	LOXL4	2.07487	1.29346	0.00323687	0.0262797
ENSBTAG00000026247	PKHD1 like 1 [Source:NCBI gene (formerly Entrezgene);Acc:100336824]	PKHD1L1	2.80683	0.928659	0.00323402	0.0262797
ENSBTAG00000054072	adrenomedullin 2 [Source:NCBI gene (formerly Entrezgene);Acc:618896]	ADM2	1.90641	2.5026	0.00323647	0.0262797
ENSBTAG00000009598	CHM Rab escort protein [Source:VGNC Symbol;Acc:VGNC:27297]	CHM	1.53519	4.67196	0.00325045	0.0263593
ENSBTAG00000019517	elastin [Source:NCBI gene (formerly Entrezgene);Acc:280781]	ELN	1.59281	2.43368	0.00325264	0.0263593
ENSBTAG00000018138	glycerol kinase 5 [Source:VGNC Symbol;Acc:VGNC:54783]	GK5	1.97491	1.54309	0.00327197	0.0264998
ENSBTAG00000015915	suprabasin [Source:VGNC Symbol;Acc:VGNC:34310]	SBSN	2.24229	0.642719	0.00327701	0.0265244
ENSBTAG00000021097	pellino E3 ubiquitin protein ligase family member 3 [Source:VGNC Symbol;Acc:VGNC:32742]	PELI3	1.93832	1.17202	0.00328132	0.026543
ENSBTAG00000018422	receptor interacting serine/threonine kinase 3 [Source:VGNC Symbol;Acc:VGNC:52818]	RIPK3	3.20374	1.59275	0.0033123	0.0267773
ENSBTAG00000039686	acyl-CoA thioesterase 11 [Source:VGNC Symbol;Acc:VGNC:25547]	ACOT11	2.05035	0.300933	0.00331445	0.0267783
ENSBTAG00000021272	ATP binding cassette subfamily G member 1 [Source:VGNC Symbol;Acc:VGNC:25483]	ABCG1	2.81414	0.448165	0.00332683	0.026862
ENSBTAG00000008709	protein O-glucosyltransferase 3 [Source:VGNC Symbol;Acc:VGNC:30518]	POGLUT3	1.70428	3.00609	0.00333906	0.0269378
ENSBTAG00000019331	katanin catalytic subunit A1 like 2 [Source:VGNC Symbol;Acc:VGNC:30407]	KATNAL2	1.72568	1.63106	0.00334028	0.0269378
ENSBTAG00000010634	neuron derived neurotrophic factor [Source:VGNC Symbol;Acc:VGNC:31937]	NDNF	1.43475	4.73718	0.00336317	0.0270729
ENSBTAG00000037945	CASK interacting protein 1 [Source:VGNC Symbol;Acc:VGNC:26777]	CASKIN1	2.04656	0.845581	0.00335996	0.0270729
ENSBTAG00000053050	sterile alpha motif domain containing 9 [Source:NCBI gene (formerly Entrezgene);Acc:514205]	SAMD9	2.19313	2.00365	0.0033615	0.0270729
ENSBTAG00000032121	succinyl-CoA:glutarate-CoA transferase [Source:VGNC Symbol;Acc:VGNC:35462]	SUGCT	3.31295	-0.102487	0.00336705	0.0270877
ENSBTAG00000021751	#NA	#NA	3.45048	-0.744405	0.003399	0.0273282
ENSBTAG00000021880	coenzyme Q8A [Source:VGNC Symbol;Acc:VGNC:27616]	COQ8A	1.7932	5.48013	0.00343638	0.0275952
ENSBTAG00000003826	sodium voltage-gated channel beta subunit 1 [Source:VGNC Symbol;Acc:VGNC:34346]	SCN1B	2.29172	0.232001	0.0034503	0.0276808
ENSBTAG00000037721	#NA	#NA	1.85975	0.594674	0.00345122	0.0276808
ENSBTAG00000020209	tigger transposable element derived 7 [Source:VGNC Symbol;Acc:VGNC:54500]	TIGD7	1.75617	2.58284	0.0034618	0.0277489
ENSBTAG00000026384	zygote arrest 1 like [Source:NCBI gene (formerly Entrezgene);Acc:616037]	ZAR1L	1.66523	1.46192	0.00346886	0.0277886
ENSBTAG00000002070	#NA	#NA	3.57204	-0.689816	0.00347974	0.0278345
ENSBTAG00000015441	actin gamma 2, smooth muscle [Source:VGNC Symbol;Acc:VGNC:59201]	ACTG2	2.22024	2.81785	0.00348089	0.0278345
ENSBTAG00000010694	BicC family RNA binding protein 1 [Source:VGNC Symbol;Acc:VGNC:26490]	BICC1	1.5427	7.00443	0.00350392	0.0279849
ENSBTAG00000018097	poly(A)-specific ribonuclease [Source:NCBI gene (formerly Entrezgene);Acc:524155]	PARN	1.30507	5.80315	0.00352833	0.028112
ENSBTAG00000048086	#NA	#NA	3.35514	-1.31972	0.00352695	0.028112
ENSBTAG00000001839	OCIA domain containing 2 [Source:VGNC Symbol;Acc:VGNC:32396]	OCIAD2	1.37668	4.68485	0.00355632	0.028318
ENSBTAG00000053863	#NA	#NA	1.90229	0.108704	0.00356134	0.028341
ENSBTAG00000016991	ephrin B2 [Source:VGNC Symbol;Acc:VGNC:28360]	EFNB2	1.55371	4.79091	0.00357148	0.0284046
ENSBTAG00000007110	REST corepressor 3 [Source:VGNC Symbol;Acc:VGNC:33836]	RCOR3	1.44546	5.21162	0.00357598	0.0284233
ENSBTAG00000048664	cyclin dependent kinase 14 [Source:NCBI gene (formerly Entrezgene);Acc:784403]	CDK14	1.62807	7.01596	0.00362746	0.0287635
ENSBTAG00000009705	serpin family F member 1 [Source:VGNC Symbol;Acc:VGNC:34478]	SERPINF1	3.75468	-0.904822	0.00364103	0.0288538
ENSBTAG00000018072	phenylalanyl-tRNA synthetase 2, mitochondrial [Source:VGNC Symbol;Acc:VGNC:28866]	FARS2	1.34008	4.39393	0.00365569	0.0289261
ENSBTAG00000020089	ubiquitin specific peptidase 32 [Source:VGNC Symbol;Acc:VGNC:36722]	USP32	1.44134	7.0871	0.00365669	0.0289261
ENSBTAG00000020855	protein tyrosine phosphatase non-receptor type 4 [Source:VGNC Symbol;Acc:VGNC:33539]	PTPN4	1.4103	4.86709	0.00365338	0.0289261
ENSBTAG00000007778	transient receptor potential cation channel subfamily M member 3 [Source:VGNC Symbol;Acc:VGNC:55085]	TRPM3	2.40839	1.86785	0.00368404	0.0291251
ENSBTAG00000012503	beta-1,4-mannosyl-glycoprotein 4-beta-N-acetylglucosaminyltransferase [Source:VGNC Symbol;Acc:VGNC:96698]	MGAT3	1.83013	0.918364	0.00371228	0.0292712
ENSBTAG00000017567	acetyl-CoA carboxylase alpha [Source:VGNC Symbol;Acc:VGNC:25519]	ACACA	1.3304	7.16111	0.00371358	0.0292712
ENSBTAG00000017846	F11 receptor [Source:VGNC Symbol;Acc:VGNC:50010]	F11R	1.25397	5.88732	0.00371002	0.0292712
ENSBTAG00000008964	D-aminoacyl-tRNA deacylase 1 [Source:VGNC Symbol;Acc:VGNC:28228]	DTD1	1.45812	4.4462	0.0037341	0.0294155
ENSBTAG00000037888	#NA	#NA	2.67849	-0.368627	0.00376024	0.0296038
ENSBTAG00000020573	signal peptide, CUB domain and EGF like domain containing 2 [Source:VGNC Symbol;Acc:VGNC:34372]	SCUBE2	1.85918	2.45223	0.00379134	0.0298132
ENSBTAG00000008864	lymphocyte antigen 96 [Source:VGNC Symbol;Acc:VGNC:53867]	LY96	1.35572	4.86177	0.00379677	0.0298382
ENSBTAG00000053766	cytochrome P450 2J2-like [Source:NCBI gene (formerly Entrezgene);Acc:107132327]	0	2.39009	-0.492866	0.0038028	0.0298679
ENSBTAG00000010131	CBFA2/RUNX1 partner transcriptional co-repressor 2 [Source:NCBI gene (formerly Entrezgene);Acc:527740]	0	1.39093	3.55998	0.00380841	0.0298862
ENSBTAG00000012387	peptidylglycine alpha-amidating monooxygenase [Source:VGNC Symbol;Acc:VGNC:32561]	PAM	1.30601	9.0214	0.00380965	0.0298862
ENSBTAG00000039855	sulfatase modifying factor 1 [Source:VGNC Symbol;Acc:VGNC:35471]	SUMF1	1.34466	5.22908	0.00381309	0.0298955
ENSBTAG00000009026	phosphofurin acidic cluster sorting protein 1 [Source:VGNC Symbol;Acc:VGNC:32541]	PACS1	1.28433	6.33293	0.0038354	0.0300349
ENSBTAG00000050993	#NA	#NA	3.17058	0.874143	0.00383411	0.0300349
ENSBTAG00000002181	KH RNA binding domain containing, signal transduction associated 3 [Source:VGNC Symbol;Acc:VGNC:30542]	KHDRBS3	2.83337	-0.0635963	0.00385284	0.0301537
ENSBTAG00000014958	protein kinase cAMP-dependent type II regulatory subunit beta [Source:VGNC Symbol;Acc:VGNC:33326]	PRKAR2B	1.71086	4.4792	0.00386143	0.030203
ENSBTAG00000011041	zinc finger FYVE-type containing 1 [Source:VGNC Symbol;Acc:VGNC:37173]	ZFYVE1	1.34718	6.50581	0.0038757	0.0302968
ENSBTAG00000000345	claudin 15 [Source:VGNC Symbol;Acc:VGNC:27405]	CLDN15	1.81666	3.46249	0.00389201	0.0303884
ENSBTAG00000012397	deoxycytidine kinase [Source:VGNC Symbol;Acc:VGNC:27914]	DCK	1.7377	6.35815	0.00390744	0.030473
ENSBTAG00000026768	#NA	#NA	2.8266	-0.48785	0.00395056	0.0307448
ENSBTAG00000007002	alpha-L-iduronidase [Source:VGNC Symbol;Acc:VGNC:30037]	IDUA	1.81673	4.97266	0.00395955	0.0307707
ENSBTAG00000022927	Rac family small GTPase 3 [Source:VGNC Symbol;Acc:VGNC:55865]	RAC3	1.87145	3.4711	0.00397459	0.0308333
ENSBTAG00000012295	NKD inhibitor of WNT signaling pathway 1 [Source:VGNC Symbol;Acc:VGNC:32093]	NKD1	2.00272	3.01576	0.0040012	0.0310034
ENSBTAG00000019844	zinc finger protein 467 [Source:VGNC Symbol;Acc:VGNC:37281]	ZNF467	2.04771	1.82976	0.00400936	0.0310485
ENSBTAG00000018260	major facilitator superfamily domain containing 11 [Source:VGNC Symbol;Acc:VGNC:31433]	MFSD11	1.42783	6.2098	0.00406122	0.0314317
ENSBTAG00000003160	leucine rich repeats and calponin homology domain containing 4 [Source:VGNC Symbol;Acc:VGNC:30974]	LRCH4	1.26219	6.54893	0.00412971	0.0319059
ENSBTAG00000004975	coiled-coil domain containing 191 [Source:VGNC Symbol;Acc:VGNC:26884]	CCDC191	1.68168	2.62712	0.00413405	0.0319209
ENSBTAG00000032122	CD19 molecule [Source:VGNC Symbol;Acc:VGNC:27007]	CD19	1.57775	4.25836	0.00415099	0.032033
ENSBTAG00000012338	fumarylacetoacetate hydrolase [Source:VGNC Symbol;Acc:VGNC:28707]	FAH	1.57882	3.70698	0.00417858	0.0321896
ENSBTAG00000011244	testis associated actin remodelling kinase 2 [Source:VGNC Symbol;Acc:VGNC:35755]	TESK2	1.3644	3.96269	0.00418668	0.0322333
ENSBTAG00000026915	NIMA related kinase 1 [Source:VGNC Symbol;Acc:VGNC:31991]	NEK1	1.62662	4.98007	0.00420704	0.0323525
ENSBTAG00000009863	basic helix-loop-helix family member e40 [Source:VGNC Symbol;Acc:VGNC:26486]	BHLHE40	1.42727	8.79671	0.00421077	0.0323623
ENSBTAG00000007382	S-phase cyclin A associated protein in the ER [Source:VGNC Symbol;Acc:VGNC:34321]	SCAPER	1.75346	4.6454	0.00422247	0.032424
ENSBTAG00000003871	cytochrome P450 subfamily 2B [Source:NCBI gene (formerly Entrezgene);Acc:504769]	CYP2B6	3.89028	0.161991	0.00427179	0.0327743
ENSBTAG00000037996	armadillo repeat containing X-linked 3 [Source:VGNC Symbol;Acc:VGNC:50548]	ARMCX3	1.28201	6.67549	0.00433265	0.0332028
ENSBTAG00000000843	NDRG family member 2 [Source:VGNC Symbol;Acc:VGNC:50007]	NDRG2	1.35189	5.109	0.00435117	0.0333254
ENSBTAG00000003353	solute carrier family 6 member 2 [Source:VGNC Symbol;Acc:VGNC:34920]	SLC6A2	2.76106	1.32439	0.00440453	0.0336757
ENSBTAG00000008546	#NA	#NA	2.50521	-0.230572	0.00441721	0.0336949
ENSBTAG00000015904	#NA	#NA	6.82809	-0.948868	0.00441078	0.0336949
ENSBTAG00000046189	ribonuclease A family member 13 (inactive) [Source:NCBI gene (formerly Entrezgene);Acc:539741]	RNASE13	3.03715	-0.400084	0.00441212	0.0336949
ENSBTAG00000007389	interferon induced protein 35 [Source:VGNC Symbol;Acc:VGNC:30044]	IFI35	1.6587	3.87773	0.00448443	0.0341683
[truncated: 12,068 more rows]
