# Supplementary material for: Discovering the Protective Effects of Quercetin on Aflatoxin B1-Induced Toxicity in Bovine Foetal Hepatocyte-Derived Cells (BFH12)
Source: Toxins (Basel). 2023 Sep 6;15(9):555. doi: 10.3390/toxins15090555 (PMC10534839; doi:10.3390/toxins15090555)
Supplement: Supplementary file 1 [file toxins-15-00555-s001.zip › TableS3.xlsx]

## Sheet: QUE vs CTRL
Table S3. Enrichment analysis. Table reports the enriched BP terms and KEGG pathways in the list of DEGs resulted from the pair-wise comparison "QUE vs CTRL". For each BP term (or KEGG pathway): gene ratio corresponds to number of annotated DEGs/number of DEGs possessing a GO/KEGG annotation, bg ratio represents the ratio between the number of annotated genes and the number of genes having a GO/K…
Term	ID	Description	Gene Ratio	Bg Ratio	p-value	p-adjusted	q-value	gene ID	Count
BP	GO:0003008	system process	39/257	198/3544	2.78221e-09	5.09979e-06	4.53647e-06	STC1/APLN/NPPB/SLC2A1/CABP1/LDLR/TBXA2R/PTGS2/CNGA1/ADRB2/SCNN1A/HMGCR/SLC24A1/COMP/POMC/INHBA/CHRNB1/PLS1/P2RY2/RAB3A/TNNC1/GPX1/SCARB1/TFAP2A/CAMK2N1/ADH5/SCN4B/NOD2/LMCD1/COL1A2/CD36/PRKG1/PTGS1/AQP1/GJB6/SOBP/INSYN1/FABP5/SLC52A3	39
BP	GO:0001568	blood vessel development	26/257	120/3544	2.18175e-07	0.000199958	0.00017787	APLN/CHGA/LDLR/IL1A/TBXA2R/COMP/VEGFA/NR4A1/HYAL1/JUNB/PGK1/NSDHL/MFGE8/GPX1/MMP2/ENPP2/ANPEP/COL1A2/THBS2/AQP1/RNASE4/PLPP3/CHI3L1/FAP/CXCL10/HPGD	26
BP	GO:0008202	steroid metabolic process	16/257	54/3544	6.34157e-07	0.000237113	0.000210922	LDLR/INSIG1/CYP51A1/HMGCR/DHRS9/HSD3B1/PMVK/DHCR7/IDI1/NR1D1/HSD17B12/TM7SF2/FDPS/NSDHL/SCARB1/SULT1A1	16
BP	GO:0006694	steroid biosynthetic process	12/257	31/3544	6.67669e-07	0.000237113	0.000210922	INSIG1/CYP51A1/HMGCR/HSD3B1/PMVK/DHCR7/IDI1/NR1D1/HSD17B12/TM7SF2/FDPS/NSDHL	12
BP	GO:0007155	cell adhesion	31/257	177/3544	2.14382e-06	0.000392961	0.000349555	SELP/CHGA/VWF/COMP/FERMT3/SPRY4/VEGFA/HYAL1/RND1/ADGRE5/MFGE8/ALCAM/TGFB1/APOD/DSC3/COL4A3/CLDN1/NOD2/CDH3/THBS2/CD36/KITLG/PRKG1/FBLN5/HLX/OMD/CDH6/PLPP3/HEPACAM/DPP4/FAP	31
BP	GO:0051046	regulation of secretion	16/257	72/3544	3.74634e-05	0.00312138	0.0027766	STC1/CHGA/IL1A/HMGCR/INHBA/NR1D1/P2RY2/RAB3A/PFKL/TGFB1/BACE1/SCIN/AQP1/PLA2R1/RNASE4/SYT1	16
BP	GO:0048871	multicellular organismal homeostasis	14/257	63/3544	0.000115737	0.00757666	0.00673974	SLC2A1/IL1A/ALPL/ADRB2/SCNN1A/COMP/NR1D1/GPX1/CLDN1/NOD2/CD36/AQP1/ALDH1A1/FABP5	14
BP	GO:0009605	response to external stimulus	47/257	385/3544	0.000149311	0.00880659	0.00783381	SLC2A1/CHGA/LDLR/CLEC7A/TBXA2R/ALPL/PTGS2/ADRB2/SCT/POMC/BHLHE40/FOXA3/TUBB3/NR1D1/FNDC4/VEGFA/NR4A1/HYAL1/IRAK2/IRF5/ALCAM/GPX1/SCARB1/TGFB1/CAMK2N1/ADH5/GPM6A/ENPP2/COTL1/KRT5/POU2AF1/LHX9/NOD2/TIFA/CD36/PRKG1/AQP1/C2/SERPING1/CHI3L1/DPP4/CXCL10/FABP4/CXCL9/CFH/CXCL11/PTX3	47
BP	GO:0008643	carbohydrate transport	8/257	24/3544	0.000181453	0.0100789	0.0089656	SLC2A1/SLC2A3/SLC2A2/PLS1/SLC35C1/TMEM144/AQP1/FABP5	8
BP	GO:0110148	biomineralization	9/257	32/3544	0.0003068	0.0140591	0.0125061	SPP1/ALPL/ADRB2/COMP/TGFB1/TFAP2A/COL1A2/OMD/CLEC3B	9
BP	GO:0015909	long-chain fatty acid transport	5/257	110/3544	0.000359275	0.0156798	0.0139478	SLC2A1/CD36/PLA2R1/FABP5/FABP4	5
BP	GO:0050678	regulation of epithelial cell proliferation	12/257	55/3544	0.000428656	0.0174377	0.0155116	NR1D1/VEGFA/NR4A1/HYAL1/GPX1/TGFB1/SRSF6/KRT5/CLDN1/NOD2/HLX/RNASE4	12
BP	GO:0016477	cell migration	28/257	205/3544	0.000651717	0.022973	0.0204354	STC1/SELP/CHGA/TBXA2R/FERMT3/VEGFA/NR4A1/HYAL1/PRR5L/GPX1/SCARB1/TGFB1/COL3A1/APOD/GPM6A/ENPP2/KRT5/CLDN1/NOD2/PRKG1/AQP1/PLPP3/IGFBP5/DPP4/FAP/CXCL10/CXCL9/CXCL11	28
BP	GO:0030198	extracellular matrix organization	9/257	36/3544	0.000796033	0.0260559	0.0231777	COMP/TGFB1/CRISPLD2/COL1A2/FBLN5/ADAMTS2/OLFML2B/DPP4/FAP	9
BP	GO:0045229	external encapsulating structure organization	9/257	36/3544	0.000796033	0.0260559	0.0231777	COMP/TGFB1/CRISPLD2/COL1A2/FBLN5/ADAMTS2/OLFML2B/DPP4/FAP	9
BP	GO:0006954	inflammatory response	18/257	111/3544	0.000860567	0.027674	0.0246172	LDLR/CLEC7A/IL1A/PTGS2/NR1D1/FNDC4/HYAL1/IRAK2/IRF5/GPX1/TGFB1/CAMK2N1/APOD/NOD2/PTGS1/CHI3L1/FABP4/CXCL9	18
BP	GO:0007186	G protein-coupled receptor signaling pathway	15/257	85/3544	0.000950735	0.028108	0.0250032	APLN/TBXA2R/ADRB2/ACKR1/CISH/POMC/P2RY2/TGM2/ADGRD1/LPAR1/ARRB1/CXCL10/HPGD/CXCL9/CXCL11	15
BP	GO:1901700	response to oxygen-containing compound	28/257	219/3544	0.00185446	0.0409544	0.0364306	GPBAR1/LDLR/SCD/TBXA2R/ALPL/ADRB2/POMC/NR1D1/NR4A1/HYAL1/IRAK2/PFKL/ALAS1/GPX1/SCARB1/TGFB1/IGF1R/ADH5/APOD/ABAT/NOD2/COL1A2/CD36/TGM2/AQP1/FIBIN/ALDH1A1/IGFBP5	28
BP	GO:0009611	response to wounding	13/257	73/3544	0.00189483	0.0413478	0.0367805	IL1A/VWF/COMP/FERMT3/GPX1/TGFB1/SRSF6/APOD/CLDN1/PRKG1/AQP1/SERPING1/PLPP3	13
KEGG	bta05322	Systemic lupus erythematosus	24/457	51/5191	6.38559e-13	1.96676e-10	1.74764e-10	506306/615043/616776/616868/787269/104968456/104975676/522960/506900/282491/538911/407131/520120/614958/519935/515440/280691/518961/527388/527645/528329/530773/617875/617905	24
KEGG	bta04613	Neutrophil extracellular trap formation	26/457	100/5191	2.64204e-07	4.06874e-05	3.61542e-05	506306/615043/616776/616868/787269/104968456/104975676/522960/281345/506900/281486/532865/538911/520120/280958/614958/519935/280691/518961/527388/527645/528329/530773/617875/617905/286865	26
KEGG	bta04974	Protein digestion and absorption	15/457	45/5191	3.40091e-06	0.000282607	0.000251121	282598/617340/281752/510833/317711/784876/282188/513804/100139730/536818/511602/781493/523526/504220/281122	15
KEGG	bta00100	Steroid biosynthesis	9/457	17/5191	3.76401e-06	0.000282607	0.000251121	505060/525154/514745/526535/504481/282384/281767/616694/505212	9
KEGG	bta05034	Alcoholism	25/457	108/5191	4.58778e-06	0.000282607	0.000251121	506306/615043/616776/616868/787269/104968456/104975676/522960/506900/617828/538911/520120/614958/617701/519935/618399/281293/280691/518961/527388/527645/528329/530773/617875/617905	25
KEGG	bta04512	ECM-receptor interaction	15/457	58/5191	0.000100097	0.00513833	0.00456585	281499/280958/281088/107131184/282654/317711/282188/100336873/338092/281052/511602/536286/281872/523526/523755	15
KEGG	bta05150	Staphylococcus aureus infection	9/457	26/5191	0.000234965	0.0103385	0.00918662	522347/281486/282491/540702/506480/507464/100296555/515440/280816	9
KEGG	bta00010	Glycolysis / Gluconeogenesis	12/457	45/5191	0.000363623	0.0139995	0.0124397	506459/788926/504584/526006/508683/281141/507476/281274/534402/505515/508629/282873	12
KEGG	bta03320	PPAR signaling pathway	13/457	52/5191	0.000415963	0.0142352	0.0126492	407767/281758/280924/521822/533016/536628/506059/617419/514969/281052/525813/281760/281759	13
KEGG	bta04640	Hematopoietic cell lineage	10/457	34/5191	0.000478474	0.014737	0.0130951	282491/281250/521554/517359/504698/404191/281052/281885/515640/281872	10
KEGG	bta00982	Drug metabolism - cytochrome P450	9/457	29/5191	0.000592762	0.0165973	0.0147482	768055/281805/783879/505515/613498/506093/281293/788719/504401	9
KEGG	bta04514	Cell adhesion molecules	15/457	70/5191	0.000903555	0.0231913	0.0206074	511318/527275/281486/282491/407131/516017/533834/783068/407173/281614/515712/414922/281063/536286/539919	15
KEGG	bta00500	Starch and sucrose metabolism	7/457	20/5191	0.00109939	0.0260471	0.023145	788926/327664/786335/534402/280812/517397/505049	7
KEGG	bta04610	Complement and coagulation cascades	10/457	39/5191	0.00155328	0.0341721	0.0303648	522347/281376/540702/505184/280958/282521/515440/281035/100271720/280816	10
KEGG	bta04080	Neuroactive ligand-receptor interaction	16/457	84/5191	0.00230569	0.0462233	0.0410734	282143/617828/538783/540702/281605/104976311/281416/282179/317707/282638/280805/281136/532829/505889/529618/790124	16
KEGG	bta04940	Type I diabetes mellitus	6/457	17/5191	0.00240121	0.0462233	0.0410734	282491/281250/407131/407173/515712/280753	6
KEGG	bta04976	Bile secretion	9/457	35/5191	0.00259439	0.0470042	0.0417672	282356/282598/281276/407159/104976311/533016/282346/282360/282653	9

## Sheet: QUE+AFB1 vs AFB1
Table S3. Enrichment analysis. Table reports the enriched BP terms and KEGG pathways in the list of DEGs resulted from the pair-wise comparison "QUE+AFB1 vs AFB1". For each BP term (or KEGG pathway): gene ratio corresponds to number of annotated DEGs/number of DEGs possessing a GO/KEGG annotation, bg ratio represents the ratio between the number of annotated genes and the number of genes having a…
Term	ID	Description	Gene Ratio	Bg Ratio	p-value	p-adjusted	q-value	gene ID	Count
BP	GO:0003008	system process	54/455	198/3544	1.53565e-08	3.30012e-05	3.09555e-05	CABP1/PRKG1/CLIC5/MAP2K6/APLN/STC1/ATP6V1B1/GLRB/PDE2A/SCNN1A/SCNN1G/TBXA2R/HMGCR/SLC8A1/ACTA2/TPPP/RAB3A/CNGA1/KCNMA1/SCN1B/LDLR/NPR3/APP/LPCAT3/NPPB/SCNN1B/SNX10/GNAT1/ID2/PRKCA/SLC2A1/USH1C/PTGES/COL1A1/F2RL1/ADORA2B/MYO6/ADH5/F2R/P2RY1/INSYN1/ABCA4/SPX/ZC3H12A/FABP5/NTS/INHBA/PTGS2/LMCD1/CDHR1/GJB6/KCNJ5/CCL2/GJB2	54
BP	GO:0051240	positive regulation of multicellular organismal process	45/455	187/3544	1.14005e-05	0.00414236	0.00388559	APLN/LPL/SERPINF1/POU2AF1/TEK/PTGIS/TBXA2R/SEMA4A/IL34/TPPP/SCAMP5/VEGFA/DMTN/LPCAT3/PRKCA/FLOT1/LOXL2/COL1A1/LY96/SRRT/HMGB1/EXOSC3/POLR3D/C1QBP/F2RL1/STOML2/ADORA2B/GPR68/F2R/RAB7B/SPX/ZC3H12A/DIO3/NFKBIZ/FABP5/INHBA/PTGS2/EGR1/CSF2/FST/PLA2R1/IL1A/WNT2/CXCL8/IL6	45
BP	GO:0006695	cholesterol biosynthetic process	9/455	15/3544	2.15141e-05	0.00577922	0.00542098	IDI1/DHCR7/HMGCR/NSDHL/CYP51A1/LSS/PMVK/FDPS/LPCAT3	9
BP	GO:1902653	secondary alcohol biosynthetic process	9/455	15/3544	2.15141e-05	0.00577922	0.00542098	IDI1/DHCR7/HMGCR/NSDHL/CYP51A1/LSS/PMVK/FDPS/LPCAT3	9
BP	GO:0043269	regulation of ion transport	24/455	80/3544	3.4544e-05	0.00742351	0.00696335	CLIC5/CYBB/STC1/KCNB2/SLC8A1/KCNMA1/SCN1B/KCNAB2/HPCA/PM20D1/KCND1/PTGES/FXYD6/NDUFA4/ATP1B3/PSEN2/CORO1A/PPIF/PLN/F2R/P2RY1/MMP9/PLA2R1/CCL2	24
BP	GO:0009605	response to external stimulus	73/455	385/3544	0.000187329	0.028755	0.0269726	PRKG1/NR1H4/CYBB/LPL/TMEM102/SCT/POU2AF1/GPM6A/GLRB/PDE2A/PTGIS/TBXA2R/FNDC4/IL34/TMEM135/ACTA2/DPYSL2/KCNMA1/MR1/SCN1B/LDLR/VEGFA/DMTN/MVK/IFI6/TRIM21/LPCAT3/SCNN1B/BNIP3L/GNAT1/VDR/ALCAM/ID2/PRKCA/SLC2A1/PTGES/COL1A1/BHLHE40/OCIAD2/LY96/POLR3K/HMGB1/POLR3D/EIF2S1/PDE12/RPL39/PTGER4/C1QBP/F2RL1/CDC42EP2/ADORA2B/CORO1A/DCTPP1/ATAD3A/ADH5/F2R/RAB7B/SPX/ZC3H12A/CD40/NFKBIZ/CFB/C2/PTGS2/PLIN2/ARG2/C…	73
KEGG	bta00100	Steroid biosynthesis	11/798	17/5191	5.39058e-06	0.00174655	0.00158313	504481/525154/514745/281767/526535/616694/505060/615906/505212/533726/539630	11
KEGG	bta00350	Tyrosine metabolism	10/798	19/5191	0.000171285	0.0204453	0.0185323	510551/531699/280707/508724/281206/509273/286886/505515/100336082/518393	10
KEGG	bta05323	Rheumatoid arthritis	19/798	53/5191	0.000189308	0.0204453	0.0185323	282491/280939/338059/281572/538567/281839/518974/281095/281250/281043/613667/281308/112441463/281666/280828/281212/281214/280826/281735	19
KEGG	bta05322	Systemic lupus erythematosus	18/798	51/5191	0.000347653	0.0281599	0.0255251	522960/282491/506306/615043/616776/616868/787269/104968456/104975676/506900/614958/538911/519935/359715/511581/617823/286849/515440	18
KEGG	bta04514	Cell adhesion molecules	22/798	70/5191	0.000526099	0.0306294	0.0277635	532751/537808/282491/531178/529873/281941/407173/783068/514998/516017/281614/618198/281196/515712/281258/525767/527275/538846/526865/286849/281839/533834	22
KEGG	bta04080	Neuroactive ligand-receptor interaction	25/798	84/5191	0.000567212	0.0306294	0.0277635	539123/282143/104976311/407140/281198/521831/280805/538783/532829/618896/512581/282331/526525/538896/529760/526585/281963/280799/509493/280881/788867/618042/540119/281665/281135	25
KEGG	bta04613	Neutrophil extracellular trap formation	28/798	100/5191	0.000804826	0.037252	0.0337664	281112/522960/506306/615043/616776/616868/787269/104968456/104975676/506900/281345/614958/517559/538911/519935/100337091/493644/280958/504531/282001/787967/100137872/517948/282691/282479/414346/535327/286865	28
KEGG	bta04020	Calcium signaling pathway	34/798	132/5191	0.00120589	0.0448901	0.0406899	100139857/535881/407140/528555/538783/526873/337925/533929/281878/282412/100337091/286771/100337204/281603/317697/281572/540106/512313/282001/538896/282479/529760/282641/414346/100125240/526585/281350/618605/616885/282301/326285/281789/509779/281665	34
KEGG	bta02010	ABC transporters	12/798	31/5191	0.00133576	0.0448901	0.0406899	510745/107131279/100299651/511762/511769/515178/100296627/511548/524959/515333/281584/518080	12
KEGG	bta04060	Cytokine-cytokine receptor interaction	31/798	118/5191	0.0013855	0.0448901	0.0406899	507054/280805/517587/514239/508292/508044/281860/282131/514803/768037/538567/281144/537922/522155/281350/286849/522636/280840/521554/281867/281095/281250/281043/613667/281666/280828/281212/281214/280826/281735/281096	31
