# Supplementary material for: Discovering the Protective Effects of Quercetin on Aflatoxin B1-Induced Toxicity in Bovine Foetal Hepatocyte-Derived Cells (BFH12)
Source: Toxins (Basel). 2023 Sep 6;15(9):555. doi: 10.3390/toxins15090555 (PMC10534839; doi:10.3390/toxins15090555)
Supplement: Supplementary file 1 [file toxins-15-00555-s001.zip › TableS4.xlsx]

## Sheet: gseKEGG
Table S4. Over-representation analysis, GSEA. Table reports the over-represented KEGG pathways resulted from the edgeR pair-wise comparison "QUE+AFB1 vs AFB1". For each KEGG pathway, ID, description, set size, enrichment score, normalised enrichmnt score (NES), p-value, adjusted p-value (by using the Benjamini-Hochberg procedure), q-value, rank, and genes belonging to the pathway, were reported. …
KEGG ID	KEGG description	SetSize	EnrichmentScore	NES	p-value	p-adjusted	q-value	Rank	CoreEnrichment
bta03010	Ribosome	127	-0.810566	-2.14577	3.22679e-12	1.08097e-09	9.57846e-10	1763	505681/616065/512469/282877/516063/783948/515534/509816/286868/505507/513222/618609/514403/534970/508165/618702/282050/282884/538054/404137/507151/615638/505603/404142/533285/535668/510547/532842/404140/768317/326588/511051/615178/510615/112442347/286873/282688/282048/509426/506768/509163/533310/508221/286839/286884/615300/533892/614872/617901/505981/513128/399560/506358/286867/540129/326602/5350…
bta05171	Coronavirus disease - COVID-19	174	-0.697654	-1.86217	4.33104e-09	7.2545e-07	6.42818e-07	1418	505507/513222/534970/508165/618702/282050/282884/404137/507151/533953/615638/281535/505603/404142/533285/535668/507359/510547/282258/404140/768317/326588/511051/615178/510615/512943/112442347/286873/282688/282048/509426/506768/509163/533310/508221/286839/286884/615300/281534/533892/614872/513128/286867/540129/326602/535056/535327/282847/514569/512745/286853/281095/768327/767908/522155/539373/5229…
bta03040	Spliceosome	122	-0.734678	-1.94999	5.99536e-08	6.69482e-06	5.93225e-06	2354	508788/615704/507895/507180/537445/510322/617519/513868/537706/614759/534586/613304/540191/540276/574400/615136/507828/512584/510852/509905/509802/534645/507738/539950/515290/614553/531493/514932/617823/613634/533700/509591/509920
bta04657	IL-17 signaling pathway	65	-0.819569	-1.98648	1.36953e-06	9.17586e-05	8.13069e-05	545	535327/281095/282871/281073/281043/281666/281214/282023/280828/281212/281308/613667/112441463/281096/280826/281735
bta03008	Ribosome biogenesis in eukaryotes	72	-0.792382	-1.9507	1.29696e-06	9.17586e-05	8.13069e-05	1287	286811/618429/535163/510315/538548/508270/517417/512136/538915/507132/511723/530688/524743/525619/514336/512692/506152/768075/520891/531274/515362/521240/404165/782674/515057/505846/511306/513405
bta03050	Proteasome	42	-0.810346	-1.82244	0.000272013	0.0151874	0.0134575	1918	507213/282013/538204/510069/510155/510593/508448/539141/506203/519729/510029/100336105/538625/513525/515503/505050/282015/512891
bta05134	Legionellosis	44	-0.780853	-1.76515	0.000560324	0.0238812	0.0211611	321	281534/526392/511913/510767/281214/280828/281212/613667/280826
bta04064	NF-kappa B signaling pathway	70	-0.703623	-1.72655	0.000570699	0.0238812	0.0211611	1103	504939/539314/505521/526824/514735/514386/281408/518089/526392/281073/286849/281214/282023/281839/280828/281212/613667
bta04668	TNF signaling pathway	98	-0.636027	-1.62844	0.000641586	0.0238812	0.0211611	962	789216/512943/531942/514386/282122/282081/516353/535327/281095/282871/281073/286865/281043/280840/281666/281214/282023/281839/281212/613667/280826/281735
bta05142	Chagas disease	69	-0.688268	-1.67963	0.000778647	0.0252595	0.0223824	1265	533953/282488/538957/512943/281534/535327/281375/538896/281073/286865/281043/280828/281789/280826
bta04340	Hedgehog signaling pathway	47	0.801107	1.5576	0.000904819	0.0252595	0.0223824	1528	280834/282874/100336796/529947/510255/534072/512018/536011/785371
bta04360	Axon guidance	151	0.661561	1.45038	0.000888374	0.0252595	0.0223824	1944	506636/407770/533746/535644/533256/534164/616742/100337091/614055/286877/534842/785942/615883/537455/282001/539369/618227/510239/516017/531141/100139818/619066/504531/517948/613794/512018/533729/788119/530719/519843/281736/539996/523720/538797/505964/282162/508008/445419/100337226/524002/531391

## Sheet: GSEA(Hallmark)
Table S4. Over-representation analysis, GSEA. Table reports the over-represented Hallmark terms resulted from the edgeR pair-wise comparison "QUE+AFB1 vs AFB1". For each Hallmark term, description, set size, enrichment score, normalised enrichmnt score (NES), p-value, adjusted p-value (by using the Benjamini-Hochberg procedure), q-value, rank, and genes belonging to the term, were reported.
Hallmark description	SetSize	EnrichmentScore	NES	p-value	p-adjusted	q-value	Rank	CoreEnrichment
MYC_TARGETS_V1	196	-0.843702	-2.3313	6.57964e-22	3.28982e-20	2.35482e-20	1569	512584/520875/513592/282477/539141/286868/286870/510852/515363/510029/538444/509802/538357/508727/513278/505603/510824/538548/539950/512500/338071/508948/326588/511051/511969/614028/509163/520979/287016/541077/530409/519254/515503/505981/100847343/539760/613336/514932/286867/617823/534576/515376/541283/505050/511048/781917/533251/506421/514355/327694/789999/509920/539373/506152/504958/511913/2815…
OXIDATIVE_PHOSPHORYLATION	194	-0.745923	-2.0589	1.09408e-12	2.7352e-11	1.95783e-11	1608	338081/508566/287027/100295800/282477/509816/515363/287014/282149/521073/613338/281640/338040/327706/512500/327713/516084/281811/327675/282446/327714/281570/327669/338079/515696/512818/614145/288380/327690/506812/509995/767847/516325/282393/286885/100139115/517535/281306/287327/282289/540278/327704/505988/509797/515580/338053/281809/510767/281748/518758/282479/505489/510347/281275/286886
TNFA_SIGNALING_VIA_NFKB	177	-0.702239	-1.92036	3.65019e-09	6.08365e-08	4.35462e-08	1192	508861/515266/510658/100297910/540245/539314/509764/513497/789216/100336481/531942/281983/514386/281534/512062/521857/528877/520939/282081/281408/539449/525380/539364/282331/100124505/281095/618605/526525/618810/286815/522155/282641/526392/281368/507061/281375/524959/535344/522921/505455/521554/407125/541148/526233/100297981/505184/281250/281043/281867/280840/281666/520842/281214/530101/282023/28…
MYC_TARGETS_V2	57	-0.882387	-2.07261	5.77377e-09	7.21721e-08	5.166e-08	1064	100138962/541169/538915/614028/520979/530409/519254/767855/514530/522024/505988/506421/540739/506152/768075/511913/510487/516874/505875/540272/509932/515808/614103/505916/404165/614025/511676/514128/510372/513045/528990/522370/513405/509981
E2F_TARGETS	196	-0.605827	-1.67401	1.9894e-06	1.9894e-05	1.42399e-05	1684	615953/515476/613304/515338/540933/533890/527397/518622/514842/513592/280716/616369/508167/539794/513278/504652/537667/615827/509002/513497/281729/282082/613729/287016/506746/767855/512754/404170/518502/515376/533251/327694/404189/540272/614103/404165/506131/533526
CHOLESTEROL_HOMEOSTASIS	67	0.812936	1.66084	1.82548e-05	0.000152124	0.000108888	1416	280924/521822/506459/281767/504584/281152/507102/407767/514745/407159/525154/280843/526535/514293/281276/505060/615906/505212/616694/513533/100299651/281156/505792/281614/614787/515654/511940/512044/515569/511671/514865/280746
DNA_REPAIR	147	-0.616405	-1.65557	3.46352e-05	0.000247394	0.000177082	1921	616718/532936/537706/511858/784304/615637/783869/618306/507828/507659/540158/100295800/519729/613653/281568/282312/512971/616377/614731/515380/512789/509834/511969/505702/282082/508491/519017/100301247/100139115/512754/535288/516337/101907103/100124505/404189/532399/616425
INFLAMMATORY_RESPONSE	127	-0.596786	-1.57605	0.000288847	0.00180529	0.00129221	519	100336768/615978/516598/286814/513497/789216/281983/281534/282035/539364/282331/100124505/618605/286815/529760/282641/281368/281375/522921/521554/281250/281043/286849/281867/280840/281666/281839/280828/526865/281096/509732/280826/281735
ALLOGRAFT_REJECTION	108	-0.594017	-1.53697	0.00106264	0.00590357	0.00422571	931	614909/616369/281861/505149/282884/282488/281535/282258/614028/531942/515988/614712/281534/533892/281923/526585/282871/506305/767908/444990/404189/524959/504211/281043/286849/281867/280840/281839/515440/280826
UV_RESPONSE_DN	124	0.664707	1.44341	0.00274411	0.0137206	0.00982103	1682	281848/511899/510559/616740/507041/781355/787248/616091/784894/287013/281276/282123/535346/100295732/537718/282573/282001/282187/539369/100137872/282463/506945/504531/511566/404101/281801/615785/282642/616399/282188/536011/327663/535716
HEME_METABOLISM	157	0.632184	1.39876	0.00452789	0.0191927	0.0137379	1948	286798/781355/518896/617024/282368/614509/618340/528076/407215/524078/534615/282356/507456/281650/408003/523970/527711/512981/281144/506059/534582/534072/513742/525659/613425/613527/507193/506114/514209/532940/522719/514006/535530
INTERFERON_GAMMA_RESPONSE	144	-0.504677	-1.35076	0.00460625	0.0191927	0.0137379	964	513497/789216/515988/540524/282081/781648/100124505/286815/524959/533834/506604/281043/286849/404070/282023/506790/281839/514076/281496/280826
MYOGENESIS	144	0.638683	1.40467	0.00535834	0.020609	0.0147517	1682	280924/506466/537224/282077/540573/541153/539971/282564/100139730/519632/282412/540446/282021/100139857/280722/535077/537655/281156/540803/614786/286822/504625/536781/514803/618793/282187/281941/528555/281509/613989/506945/538404/280765/508832/407231/539375/100137722/508632/504242/508394/509486/282096/535716
